# Supplementary material for: Transition between fermentation and respiration determines history-dependent behavior in fluctuating carbon sources
Source: eLife journal article supplement (doi:10.7554/elife.39234), 2018-10-09
Supplement: supp [file elife-39234-supp-v1.zip]

# Figure 6-figure supplement 3

Oxygen consumption during glucose growth and lag phase.

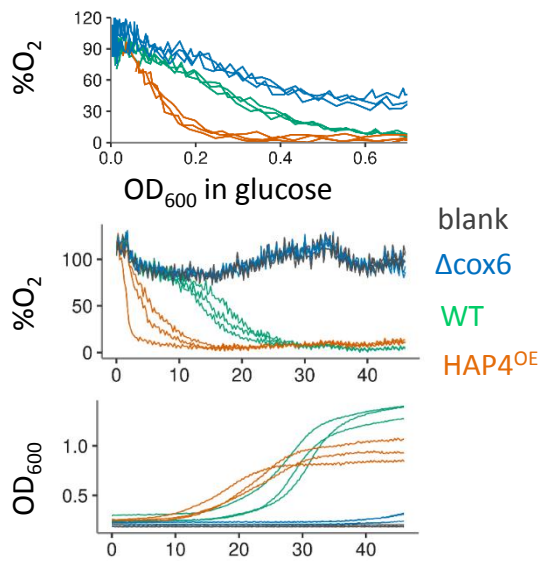

Time in maltose after growth in glucose (h)
