# Supplementary material for: Transition between fermentation and respiration determines history-dependent behavior in fluctuating carbon sources
Source: eLife journal article supplement (doi:10.7554/elife.39234), 2018-10-09
Supplement: supp [file elife-39234-supp-v1.zip]

Archive with 34 entries (34 files):
- elife_poa_e39234_Figure_4_figure_supplement_4.pdf
- elife_poa_e39234_Figure_6_figure_supplement_1.pdf
- elife_poa_e39234_Transparent_Reporting_File.pdf
- elife_poa_e39234_Figure_1_figure_supplement_3.pdf
- elife_poa_e39234_Figure_5_figure_supplement_2.pdf
- elife_poa_e39234_Figure_2_figure_supplement_2.pdf
- elife_poa_e39234_Figure_2_figure_supplement_3.pdf
- elife_poa_e39234_Figure_4_figure_supplement_6.pdf
- elife_poa_e39234_Figure_5_figure_supplement_1.pdf
- elife_poa_e39234_Figure_5_figure_supplement_3.pdf
- elife_poa_e39234_Figure_4_figure_supplement_1.pdf
- elife_poa_e39234_Figure_3_figure_supplement_5.pdf
- elife_poa_e39234_Figure_2_figure_supplement_1.pdf
- elife_poa_e39234_Figure_1_figure_supplement_4.pdf
- elife_poa_e39234_Supplementary_File_2.csv
- elife_poa_e39234_Figure_3_figure_supplement_7.pdf
- elife_poa_e39234_Figure_3_figure_supplement_4.pdf
- elife_poa_e39234_Figure_1_figure_supplement_6.pdf
- elife_poa_e39234_Figure_4_figure_supplement_3.pdf
- elife_poa_e39234_Supplementary_File_1.xlsx
- elife_poa_e39234_Figure_5_figure_supplement_4.pdf
- elife_poa_e39234_Figure_1_figure_supplement_2.pdf
- elife_poa_e39234_Figure_1_figure_supplement_1.pdf
- elife_poa_e39234_Figure_4_figure_supplement_2.pdf
- elife_poa_e39234_Figure_4_figure_supplement_5.pdf
- elife_poa_e39234_Figure_3_figure_supplement_6.pdf
- elife_poa_e39234_Supplementary_File_3.xlsx
- elife_poa_e39234_Figure_6_figure_supplement_2.pdf
- elife_poa_e39234_Figure_6_figure_supplement_3.pdf
- elife_poa_e39234_Figure_1_figure_supplement_5.pdf
- elife_poa_e39234_Figure_3_figure_supplement_3.pdf
- elife_poa_e39234_Figure_3_figure_supplement_2.pdf
- elife_poa_e39234_Figure_3_figure_supplement_1.pdf
- elife_poa_e39234_Figure_2_figure_supplement_4.pdf
