# Supplementary material for: Transition between fermentation and respiration determines history-dependent behavior in fluctuating carbon sources
Source: eLife journal article supplement (doi:10.7554/elife.39234), 2018-10-09
Supplement: supp [file elife-39234-supp-v1.zip › elife_poa_e39234_Figure_4_figure_supplement_1.pdf]

# Figure 4-figure supplement 1
