# Supplementary material for: Transition between fermentation and respiration determines history-dependent behavior in fluctuating carbon sources
Source: eLife journal article supplement (doi:10.7554/elife.39234), 2018-10-09

# Figure 5-figure supplement 4

Correlation between protein and mRNA changes during glucose growth

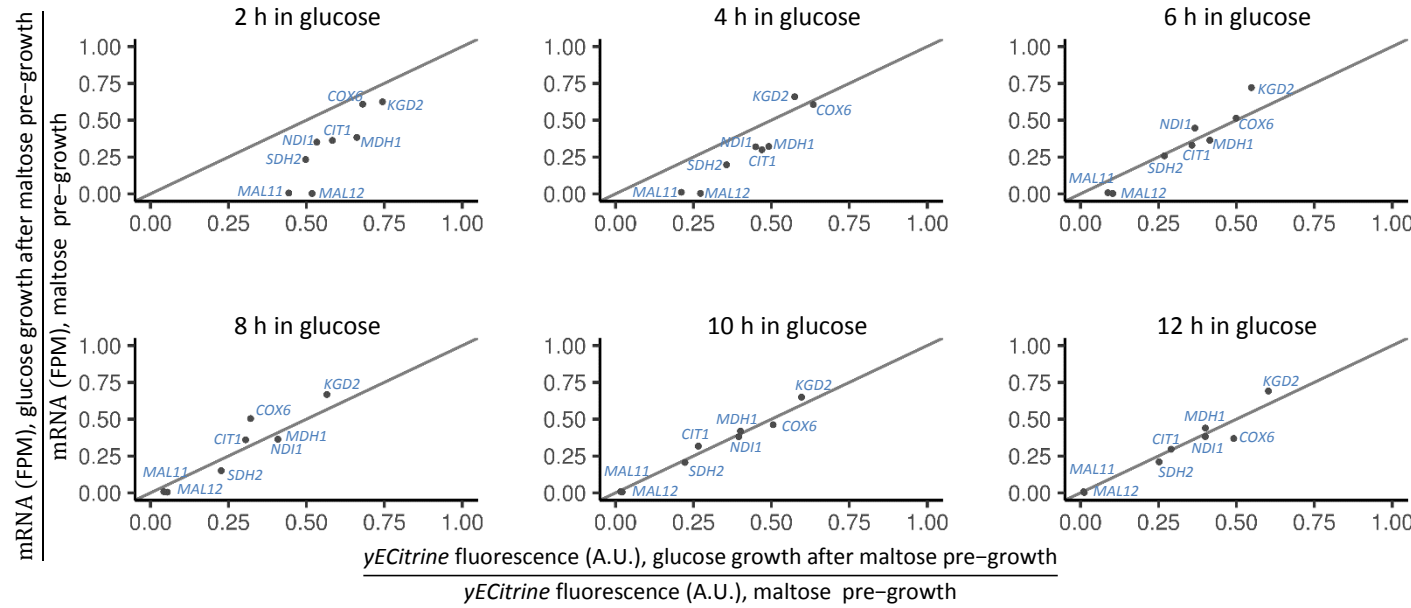

Supplement: supp [file elife-39234-supp-v1.zip › elife_poa_e39234_Figure_5_figure_supplement_4.pdf]
