# Supplementary material for: Transition between fermentation and respiration determines history-dependent behavior in fluctuating carbon sources
Source: eLife journal article supplement (doi:10.7554/elife.39234), 2018-10-09
Supplement: supp [file elife-39234-supp-v1.zip › elife_poa_e39234_Supplementary_File_1.xlsx]

## Sheet: CalculatingTimesAndPopGr
			Times are for when the measurement was taken, not the sample
			The time and population growth are taken from when the cell count happened
			The ratios are for when the cells were stopped growing, so after the spinning and the freezing
			SampleNr		1	2		3	4	5	6	7	8	9	10	11	12	13	14		15	16	17	18	19	20	21	22	23	24	25	26	27	28		29	30
			Name		StartGlu	StartGlu		Glu2Start	Glu2Start	Glu4Start	Glu4Start	Glu6Start	Glu6Start	Glu8Start	Glu8Start	Glu10Start	Glu10Start	Glu12Start	Glu12Start		EndMal	EndMal	Glu2End	Glu2End	Glu4End	Glu4End	Glu6End	Glu6End	Glu8End	Glu8End	Glu10End	Glu10End	Glu12End	Glu12End		Pool	Pool
			BiolRepl		A	B		A	B	A	B	A	B	A	B	A	B	A	B		A	B	A	B	A	B	A	B	A	B	A	B	A	B		A	B
			TypeOfRun		PreGlucose	PreGlucose		2	2	4	4	6	6	8	8	10	10	12	12		0	0	2	2	4	4	6	6	8	8	10	10	12	12		Pool	Pool
	Time		Day		0	0		1	1	1	1	1	1	1	1	1	1	1	1		1	1	1	1	1	1	1	1	1	1	1	1	1	1
	StartInTheFlask		Hour		16	16		10	10	10	10	10	10	10	10	10	10	10	10		10	10	12	12	14	14	16	16	18	18	20	20	22	22
			Min		0	0		8	8	8	8	8	8	8	8	8	8	8	8		5	5	16	16	17	17	14	14	14	14	12	12	33	33
			Normalized		0	0		18.1333	18.1333	18.1333	18.1333	18.1333	18.1333	18.1333	18.1333	18.1333	18.1333	18.1333	18.1333		18.0833	18.0833	20.2667	20.2667	22.2833	22.2833	24.2333	24.2333	26.2333	26.2333	28.2	28.2	30.55	30.55
			Cell Count		89900	122500		1.34799e+06	1.34799e+06	605690	605690	272154	272154	122287	122287	54946.9	54946.9	24689.2	24689.2		625000	625000	625000	625000	625000	625000	625000	625000	625000	625000	625000	625000	625000	625000
	Time		Day		1	1		1	1	1	1	1	1	1	1	1	1	1	1		1	1	2	2	2	2	2	2	2	2	3	3	3	3		0	0	d
	CellCount		Hour		9	9		12	12	14	14	16	16	18	18	19	19	22	22		16	16	0	0	9	9	15	15	22	22	4	4	9	9		16	16	h
			Min		41.5	41.5		3	3	4	4	0	0	1	1	58	58	21	21		40	40	53	53	16	16	33	33	24	24	27	27	7.5	7.5		0	0	m
			Normalized		17.6917	17.6917		20.05	20.05	22.0667	22.0667	24	24	26.0167	26.0167	27.9667	27.9667	30.35	30.35		24.6667	24.6667	32.8833	32.8833	41.2667	41.2667	47.55	47.55	54.4	54.4	60.45	60.45	65.125	65.125		0	0
			Cell Count		6518750	6327500		3472500	3017500	3252500	3075000	3522500	3085000	3722500	3252500	3147500	2952500	3260000	2995000		5147500	4622500	5921250	4841250	5257500	5678750	5655000	6455000	4021250	5046250	4672500	4610000	5131250	4512500		899000	1225000
			DilutionNr		0	0		1	1	1	1	1	1	1	1	1	1	1	1		2	2	2	2	2	2	2	2	2	2	2	2	2	2		0	0
	Time
	WhenTheLagStarts		Day		Absolute			1		1		1		1		1		1			1		1		1		1		1		1		1
			Hour					12		14		16		18		20		22			10		12		14		16		18		20		22
			Min					16		17		14		14		12		33			8		16		17		14		14		12		33
			Day		Normal to 29,30 start			1		1		1		1		1		1			1		1		1		1		1		1		1
			Hour					-4		-2		0		2		4		6			-6		-4		-2		0		2		4		6
			Min					16		17		14		14		12		33			8		16		17		14		14		12		33
			Normalized					20.2667	20.2667	22.2833	22.2833	24.2333	24.2333	26.2333	26.2333	28.2	28.2	30.55	30.55		18.1333	18.1333	20.2667	20.2667	22.2833	22.2833	24.2333	24.2333	26.2333	26.2333	28.2	28.2	30.55	30.55
			TimesRelToShift		NA	NA		-0.216667	-0.216667	-0.216667	-0.216667	-0.233333	-0.233333	-0.216667	-0.216667	-0.233333	-0.233333	-0.2	-0.2		6.53333	6.53333	12.6167	12.6167	18.9833	18.9833	23.3167	23.3167	28.1667	28.1667	32.25	32.25	34.575	34.575		NA	NA
	HowMuch		Dil1		72.5111	51.6531		72.5111	51.6531	72.5111	51.6531	72.5111	51.6531	72.5111	51.6531	72.5111	51.6531	72.5111	51.6531		72.5111	51.6531	72.5111	51.6531	72.5111	51.6531	72.5111	51.6531	72.5111	51.6531	72.5111	51.6531	72.5111	51.6531		1	1
	DidItGrow		Dil2		1	1		2.57606	2.23852	5.36991	5.07686	12.943	11.3355	30.4408	26.5974	57.2826	53.7337	132.041	121.308		8.236	7.396	2.57606	2.23852	5.36991	5.07686	12.943	11.3355	30.4408	26.5974	57.2826	53.7337	132.041	121.308		1	1
	FoldIncrease		Dil3		1	1		1	1	1	1	1	1	1	1	1	1	1	1		1	1	9.474	7.746	8.412	9.086	9.048	10.328	6.434	8.074	7.476	7.376	8.21	7.22		1	1
			NormToPoolStart		72.5111	51.6531		186.793	115.627	389.378	262.235	938.515	585.513	2207.3	1373.83	4153.62	2775.51	9574.46	6265.92		597.202	382.026	1769.68	895.643	3275.45	2382.67	8491.68	6047.18	14201.7	11092.3	31052.5	20472.2	78606.4	45240		1	1
			NormToGluStart		1	1		2.57606	2.23852	5.36991	5.07686	12.943	11.3355	30.4408	26.5974	57.2826	53.7337	132.041	121.308		8.236	7.396	24.4056	17.3396	45.1717	46.1283	117.109	117.073	195.856	214.747	428.244	396.34	1084.06	875.843		0.013791	0.0193599
			SampleNr		1	2		3	4	5	6	7	8	9	10	11	12	13	14		15	16	17	18	19	20	21	22	23	24	25	26	27	28		29	30
			Time		17.6917	17.6917		20.05	20.05	22.0667	22.0667	24	24	26.0167	26.0167	27.9667	27.9667	30.35	30.35		24.6667	24.6667	32.8833	32.8833	41.2667	41.2667	47.55	47.55	54.4	54.4	60.45	60.45	65.125	65.125		0	0
			FoldIncrease		1	1		2.57606	2.23852	5.36991	5.07686	12.943	11.3355	30.4408	26.5974	57.2826	53.7337	132.041	121.308		8.236	7.396	24.4056	17.3396	45.1717	46.1283	117.109	117.073	195.856	214.747	428.244	396.34	1084.06	875.843		0.013791	0.0193599
			Plot How the Population Growth Changes					12		17.6917	30.35	65.125
										1	132.041	1084.06
										1	121.308	875.843
								10		17.6917	27.9667	60.45
										1	57.2826	428.244
										1	53.7337	396.34
										17.6917	26.0167	54.4
								8		1	30.4408	195.856
										1	26.5974	214.747
								6		17.6917	24	47.55
										1	12.943	117.109
										1	11.3355	117.073
								4		17.6917	22.0667	41.2667
										1	5.36991	45.1717
										1	5.07686	46.1283
								2		17.6917	20.05	32.8833
										1	2.57606	24.4056
										1	2.23852	17.3396
								0		17.6917	24.6667
										1	8.236
										1	7.396

## Sheet: Summary
		Starting from the 2 mismatch - 3 gaps read count data
		These parameters are calculated for each knock-out:
		Counts (times a barcodes was found)
		Frequencies (multiplied by the population growth)
		Doublings on glucose
		Doublings on maltose
		Average growth rates during the lag
		Lag times (This is the final parameter assigned to each KO, in the tab "UPDN - Lags".)

## Sheet: UP - Freq
		Got the data from the 2 mismatches - 3 gaps selection procedure																																					Frequencies
		UP tags																																					UP tags
			1	2	3	4	5	6	7	8	9	10	11	12	13	14	15	16	17	18	19	20	21	22	23	24	25	26	27	28	29	30								1	2	3	4	5	6	7	8	9	10
		Sum	2826033	2676045	2880306	2281338	2039191	2493891	2282939	2417139	2553378	2858217	2631525	2586254	2268064	2510888	2210247	2059850	2599078	2684252	2534570	2720856	2574621	3126487	2715595	2418156	3022764	2725983	2653982	2571976	1937624	2370494							Sum	1	1	1	1	1	1	1	1	1	1
		YAL002W	46	61	71	45	38	49	52	70	46	75	51	52	41	50	48	29	117	147	460	441	1035	1067	3570	3013	9979	9834	12697	12325	69	105							YAL002W	1.62772e-05	2.27948e-05	2.46502e-05	1.97253e-05	1.86348e-05	1.9648e-05	2.27777e-05	2.89599e-05	1.80154e-05	2.62401e-05
		YAL004W	726	784	725	639	419	624	592	573	555	671	588	612	503	623	573	499	527	500	337	392	187	272	103	123	97	126	59	73	455	512							YAL004W	0.000256897	0.00029297	0.000251709	0.000280099	0.000205474	0.000250211	0.000259315	0.000237057	0.000217359	0.000234762
		YAL005C	872	890	1039	732	578	883	794	753	927	992	993	899	803	840	778	702	902	849	723	764	496	719	348	305	214	185	126	135	492	649							YAL005C	0.00030856	0.00033258	0.000360726	0.000320864	0.000283446	0.000354065	0.000347797	0.000311525	0.000363048	0.00034707
		YAL007C	860	803	874	620	588	752	703	784	678	842	880	743	753	851	723	642	875	828	771	760	797	964	614	583	447	385	241	281	654	790							YAL007C	0.000304314	0.00030007	0.00030344	0.00027177	0.00028835	0.000301537	0.000307936	0.00032435	0.000265531	0.000294589
		YAL008W	906	821	1015	774	593	846	637	723	741	927	923	756	760	764	782	714	884	826	674	752	705	858	572	479	370	341	208	229	558	713							YAL008W	0.000320591	0.000306796	0.000352393	0.000339275	0.000290802	0.000339229	0.000279026	0.000299114	0.000290204	0.000324328
		YAL009W	0	0	0	0	0	0	0	0	0	0	0	0	0	0	0	0	0	0	0	0	0	0	0	0	0	0	0	0	0	0							YAL009W	0	0	0	0	0	0	0	0	0	0
		YAL010C	0	0	0	0	0	0	0	0	0	0	0	0	0	0	0	0	0	0	0	0	1	0	0	0	0	0	0	0	0	0							YAL010C	0	0	0	0	0	0	0	0	0	0
		YAL011W	793	805	820	620	494	708	550	623	624	815	670	608	644	632	636	579	1088	1196	1721	1712	1837	2165	1578	1376	1146	1126	740	856	514	627							YAL011W	0.000280605	0.000300817	0.000284692	0.00027177	0.000242253	0.000283894	0.000240918	0.000257743	0.000244382	0.000285143
		YAL012W	0	0	0	0	0	0	0	0	0	0	0	0	0	0	0	0	0	0	0	0	0	0	0	0	0	0	0	0	0	0							YAL012W	0	0	0	0	0	0	0	0	0	0
		YAL013W	0	0	0	0	0	0	0	0	0	0	0	0	0	0	0	0	0	0	0	0	0	0	0	0	0	0	0	1	0	0							YAL013W	0	0	0	0	0	0	0	0	0	0
		YAL014C	991	968	1018	660	627	755	737	774	768	956	917	838	792	838	779	682	1318	1334	1548	1597	1281	1535	826	739	508	476	307	291	547	629							YAL014C	0.000350668	0.000361728	0.000353435	0.000289304	0.000307475	0.00030274	0.000322829	0.000320213	0.000300778	0.000334474
		YAL015C	761	786	761	654	499	703	563	642	614	798	693	687	574	686	583	557	761	792	648	715	659	842	579	562	409	337	164	242	428	522							YAL015C	0.000269282	0.000293717	0.000264208	0.000286674	0.000244705	0.000281889	0.000246612	0.000265603	0.000240466	0.000279195
		YAL016C-B	0	0	0	0	0	0	0	0	0	0	0	0	0	0	0	0	0	0	0	0	0	0	0	0	0	0	0	0	0	0							YAL016C-B	0	0	0	0	0	0	0	0	0	0
		YAL016W	0	0	0	0	0	0	0	0	0	0	0	0	0	0	0	0	0	0	0	0	0	0	0	0	0	0	0	0	0	0							YAL016W	0	0	0	0	0	0	0	0	0	0
		YAL017W	747	746	819	619	533	652	578	666	598	748	709	724	691	743	624	617	799	765	637	703	615	812	426	501	274	256	139	167	499	563							YAL017W	0.000264328	0.00027877	0.000284345	0.000271332	0.000261378	0.000261439	0.000253182	0.000275532	0.0002342	0.000261702
		YAL018C	881	782	858	631	549	755	678	719	745	841	816	718	772	751	608	635	836	823	659	713	698	910	549	542	337	285	182	204	481	642							YAL018C	0.000311744	0.000292222	0.000297885	0.000276592	0.000269224	0.00030274	0.000296986	0.000297459	0.00029177	0.000294239
		YAL019W	1130	1048	1109	825	703	928	771	877	840	1002	923	868	800	888	824	719	891	835	692	708	600	762	385	380	202	165	111	104	822	1093							YAL019W	0.000399854	0.000391623	0.000385029	0.00036163	0.000344745	0.000372109	0.000337723	0.000362826	0.000328976	0.000350568
		YAL020C	614	577	627	382	304	405	326	354	273	340	297	331	248	284	356	282	400	413	340	354	288	398	366	344	299	216	191	125	598	703							YAL020C	0.000217266	0.000215617	0.000217685	0.000167446	0.000149079	0.000162397	0.000142798	0.000146454	0.000106917	0.000118955
		YAL021C	0	0	0	0	0	0	0	0	0	0	0	0	0	0	0	0	0	0	0	0	0	0	0	0	0	0	0	0	0	0							YAL021C	0	0	0	0	0	0	0	0	0	0
		YAL022C	872	793	852	654	554	678	645	651	644	847	744	719	664	724	629	610	883	786	702	768	683	878	485	546	368	320	170	189	485	640							YAL022C	0.00030856	0.000296333	0.000295802	0.000286674	0.000271676	0.000271864	0.000282531	0.000269327	0.000252215	0.000296339
		YAL023C	802	803	741	631	511	651	537	582	494	593	566	534	509	477	546	550	754	856	503	482	333	340	339	290	214	196	137	166	558	704							YAL023C	0.00028379	0.00030007	0.000257264	0.000276592	0.00025059	0.000261038	0.000235223	0.000240781	0.000193469	0.000207472
		YAL024C	0	0	0	0	0	0	0	0	0	1	0	0	0	0	0	0	0	0	0	0	0	0	0	0	0	0	0	0	0	0							YAL024C	0	0	0	0	0	0	0	0	0	3.49868e-07
		YAL026C	660	627	768	552	445	604	623	539	554	681	628	648	576	566	501	459	540	460	367	427	463	613	588	478	461	349	334	376	332	436							YAL026C	0.000233543	0.000234301	0.000266638	0.000241963	0.000218224	0.000242192	0.000272894	0.000222991	0.000216967	0.00023826
		YAL027W	0	0	0	0	0	0	0	0	0	0	0	0	0	0	0	0	0	0	0	0	0	0	0	0	0	0	0	0	0	0							YAL027W	0	0	0	0	0	0	0	0	0	0
		YAL028W	849	758	884	665	514	748	642	708	649	746	764	760	680	752	668	620	849	816	745	810	610	784	482	487	290	267	177	181	460	588							YAL028W	0.000300421	0.000283254	0.000306912	0.000291496	0.000252061	0.000299933	0.000281216	0.000292908	0.000254173	0.000261002
		YAL029C	734	621	757	624	468	644	636	627	620	758	760	701	638	712	632	514	815	766	538	657	539	714	498	435	306	303	175	188	496	540							YAL029C	0.000259728	0.000232059	0.000262819	0.000273524	0.000229503	0.000258231	0.000278588	0.000259398	0.000242816	0.0002652
		YAL030W	782	749	848	664	506	715	567	650	621	780	692	781	688	699	595	600	899	765	688	743	683	911	489	518	369	373	246	240	453	663							YAL030W	0.000276713	0.000279891	0.000294413	0.000291057	0.000248138	0.000286701	0.000248364	0.000268913	0.000243207	0.000272897
		YAL031C	715	742	821	598	524	699	588	597	577	720	730	613	590	623	596	535	754	728	528	613	575	658	425	340	273	230	144	139	511	633							YAL031C	0.000253005	0.000277275	0.000285039	0.000262127	0.000256965	0.000280285	0.000257563	0.000246986	0.000225975	0.000251905
		YAL034C	828	841	869	653	570	778	735	771	755	888	879	771	734	887	662	652	939	942	808	903	783	1105	667	645	433	352	258	225	556	783							YAL034C	0.00029299	0.00031427	0.000301704	0.000286236	0.000279523	0.000311962	0.000321953	0.000318972	0.000295687	0.000310683
		YAL035W	0	0	0	0	0	0	0	0	0	0	0	0	0	0	0	0	0	0	0	0	0	0	0	0	0	0	0	0	0	0							YAL035W	0	0	0	0	0	0	0	0	0	0
		YAL036C	1078	1009	1148	867	692	946	799	809	866	1086	950	953	829	905	822	749	1008	1000	776	803	714	1020	675	588	395	373	242	196	859	969							YAL036C	0.000381453	0.000377049	0.000398569	0.00038004	0.00033935	0.000379327	0.000349987	0.000334693	0.000339159	0.000379957
		YAL037C-A	0	0	0	0	0	0	0	0	0	0	0	0	0	0	0	0	0	0	0	0	0	0	0	0	0	0	0	0	0	0							YAL037C-A	0	0	0	0	0	0	0	0	0	0
		YAL037W	703	660	843	605	511	634	574	605	572	748	741	612	616	648	572	513	741	684	519	557	499	708	428	408	302	267	142	223	531	720							YAL037W	0.000248759	0.000246633	0.000292677	0.000265195	0.00025059	0.000254221	0.00025143	0.000250296	0.000224017	0.000261702
		YAL039C	0	0	0	0	0	0	0	0	0	0	0	0	0	0	0	0	0	0	0	0	0	0	0	0	0	0	0	0	0	0							YAL039C	0	0	0	0	0	0	0	0	0	0
		YAL040C	837	874	877	577	596	726	651	657	633	793	698	610	684	743	683	611	897	884	798	814	819	1066	718	751	606	524	334	269	690	931							YAL040C	0.000296175	0.000326601	0.000304482	0.000252922	0.000292273	0.000291111	0.000285159	0.000271809	0.000247907	0.000277446
		YAL042W	836	762	963	631	524	737	672	679	665	860	766	818	696	802	679	561	839	897	703	712	732	1014	909	702	747	638	392	420	482	587							YAL042W	0.000295821	0.000284749	0.000334339	0.000276592	0.000256965	0.000295522	0.000294357	0.000280911	0.000260439	0.000300887
		YAL043C-A	585	657	742	570	472	643	634	595	524	721	716	657	608	657	552	484	646	760	564	593	542	568	600	271	550	516	312	405	364	427							YAL043C-A	0.000207004	0.000245512	0.000257612	0.000249853	0.000231464	0.00025783	0.000277712	0.000246159	0.000205218	0.000252255
		YAL044C	437	455	399	326	191	287	218	218	181	213	182	212	123	156	263	254	141	160	84	86	52	49	17	15	19	9	7	11	494	662							YAL044C	0.000154634	0.000170027	0.000138527	0.000142899	9.36646e-05	0.000115081	9.54909e-05	9.01893e-05	7.08865e-05	7.4522e-05
		YAL044W-A	0	0	0	0	0	0	0	0	0	0	0	0	0	0	0	0	0	0	0	0	0	0	0	0	0	0	0	0	0	0							YAL044W-A	0	0	0	0	0	0	0	0	0	0
		YAL045C	769	817	860	680	574	684	701	659	738	795	768	739	655	691	624	635	773	731	639	704	598	851	499	444	312	239	178	154	511	643							YAL045C	0.000272113	0.000305301	0.000298579	0.000298071	0.000281484	0.00027427	0.00030706	0.000272636	0.000289029	0.000278145
		YAL046C	0	0	0	0	0	0	0	0	0	0	0	0	0	0	0	0	0	0	0	0	0	0	0	0	0	0	0	0	0	0							YAL046C	0	0	0	0	0	0	0	0	0	0
		YAL047C	0	0	0	0	0	0	0	0	0	0	0	0	0	1	0	0	0	0	0	0	0	0	0	0	0	0	0	0	0	0							YAL047C	0	0	0	0	0	0	0	0	0	0
		YAL048C	548	567	618	435	355	502	440	458	423	576	439	445	395	470	419	419	338	360	298	263	296	442	484	425	592	484	387	403	489	656							YAL048C	0.000193911	0.00021188	0.000214561	0.000190678	0.000174089	0.000201292	0.000192734	0.00018948	0.000165663	0.000201524
		YAL049C	0	0	0	0	0	0	0	0	0	0	0	0	0	0	0	0	0	0	0	0	0	0	0	0	0	0	1	0	0	0							YAL049C	0	0	0	0	0	0	0	0	0	0
		YAL051W	602	570	581	481	411	520	443	553	507	675	573	492	472	477	464	458	599	641	549	615	610	763	372	386	193	225	150	129	620	740							YAL051W	0.000213019	0.000213001	0.000201715	0.000210841	0.000201551	0.00020851	0.000194048	0.000228783	0.00019856	0.000236161
		YAL053W	661	572	654	504	459	598	515	514	497	627	656	520	464	525	458	447	473	501	304	292	235	281	167	181	137	105	87	75	487	735							YAL053W	0.000233897	0.000213748	0.000227059	0.000220923	0.000225089	0.000239786	0.000225586	0.000212648	0.000194644	0.000219368
		YAL054C	741	633	747	567	452	625	546	545	577	753	746	637	586	616	505	520	682	671	530	586	528	731	410	383	275	244	138	128	448	611							YAL054C	0.000262205	0.000236543	0.000259347	0.000248538	0.000221657	0.000250612	0.000239165	0.000225473	0.000225975	0.000263451
		YAL055W	908	875	983	721	620	726	601	648	538	661	587	534	447	454	722	686	820	863	704	704	774	1043	826	742	687	622	333	328	412	534							YAL055W	0.000321298	0.000326975	0.000341283	0.000316043	0.000304042	0.000291111	0.000263257	0.000268086	0.000210701	0.000231263
		YAL056W	798	875	1083	696	649	868	759	733	778	1015	988	911	845	953	752	666	838	751	634	666	388	504	172	143	108	76	65	73	567	734							YAL056W	0.000282375	0.000326975	0.000376002	0.000305084	0.000318263	0.00034805	0.000332466	0.000303251	0.000304694	0.000355116
		YAL058C-A	884	934	978	686	602	847	567	602	551	650	598	585	476	530	658	677	760	761	393	433	265	316	366	340	335	217	170	163	671	814							YAL058C-A	0.000312806	0.000349023	0.000339547	0.000300701	0.000295215	0.00033963	0.000248364	0.000249055	0.000215793	0.000227415
		YAL058W	931	776	964	660	567	739	622	621	557	676	568	576	490	574	642	587	775	719	452	467	312	385	463	410	466	362	390	382	572	767							YAL058W	0.000329437	0.00028998	0.000334687	0.000289304	0.000278051	0.000296324	0.000272456	0.000256915	0.000218142	0.000236511
		YAL059W	766	759	795	635	518	630	557	532	515	651	657	562	545	554	568	501	770	746	903	969	907	1101	814	794	393	405	207	254	535	662							YAL059W	0.000271051	0.000283628	0.000276012	0.000278345	0.000254022	0.000252617	0.000243984	0.000220095	0.000201694	0.000227764
		YAL060W	830	871	940	693	643	747	680	767	792	839	917	739	756	813	722	698	967	969	982	979	839	1145	665	644	507	392	248	249	596	704							YAL060W	0.000293698	0.00032548	0.000326354	0.000303769	0.000315321	0.000299532	0.000297862	0.000317317	0.000310177	0.00029354
		YAL061W	0	0	0	0	0	0	0	0	0	0	0	0	0	0	0	0	0	0	0	0	0	0	0	0	0	0	0	0	0	0							YAL061W	0	0	0	0	0	0	0	0	0	0
		YAL062W	690	709	720	602	471	653	592	572	613	721	720	647	613	612	565	561	745	703	558	616	535	732	442	389	277	233	146	157	577	624							YAL062W	0.000244159	0.000264943	0.000249973	0.00026388	0.000230974	0.00026184	0.000259315	0.000236643	0.000240074	0.000252255
		YAL064C-A	0	0	1	0	0	0	0	0	0	0	0	0	0	0	0	0	0	0	0	0	0	0	0	0	0	0	0	0	0	0							YAL064C-A	0	0	3.47185e-07	0	0	0	0	0	0	0
		YAL065C	760	710	868	610	535	700	652	635	657	809	723	784	598	648	587	544	859	725	657	725	627	825	511	417	290	297	166	206	551	584							YAL065C	0.000268928	0.000265317	0.000301357	0.000267387	0.000262359	0.000280686	0.000285597	0.000262707	0.000257306	0.000283044
		YAL066W	726	729	833	603	466	743	605	633	577	800	787	676	643	663	601	521	780	722	601	645	584	709	451	386	318	249	156	154	567	653							YAL066W	0.000256897	0.000272417	0.000289205	0.000264319	0.000228522	0.000297928	0.000265009	0.00026188	0.000225975	0.000279895
		YAL067C	797	725	781	634	524	714	593	630	664	721	753	660	656	657	632	573	829	729	693	703	641	892	514	509	329	301	173	167	552	648							YAL067C	0.000282021	0.000270922	0.000271152	0.000277907	0.000256965	0.0002863	0.000259753	0.000260639	0.000260048	0.000252255
		YAL067W-A	0	0	0	0	0	0	0	0	0	0	0	0	0	0	0	0	0	0	0	0	0	0	0	0	0	0	0	0	0	0							YAL067W-A	0	0	0	0	0	0	0	0	0	0
		YAL068C	629	655	803	613	512	669	616	605	589	730	711	659	579	607	509	504	920	795	912	982	999	1332	828	772	375	365	169	162	497	614							YAL068C	0.000222573	0.000244764	0.00027879	0.000268702	0.00025108	0.000268256	0.000269828	0.000250296	0.000230675	0.000255404
		YAR002C-A	1070	979	1035	838	691	916	810	822	842	1024	992	927	848	962	784	694	1068	1118	1086	1091	1184	1400	935	861	632	484	253	237	592	798							YAR002C-A	0.000378623	0.000365838	0.000359337	0.000367328	0.00033886	0.000367298	0.000354806	0.000340071	0.000329759	0.000358265
		YAR002W	45	67	89	60	44	69	79	68	41	86	57	72	54	52	60	65	79	93	140	143	162	121	302	87	622	687	730	734	20	24							YAR002W	1.59234e-05	2.50369e-05	3.08995e-05	2.63004e-05	2.15772e-05	2.76676e-05	3.46045e-05	2.81324e-05	1.60572e-05	3.00887e-05
		YAR003W	218	226	242	203	171	205	196	171	168	252	212	214	142	190	138	154	58	82	63	50	59	60	53	26	57	72	25	42	215	278							YAR003W	7.71399e-05	8.4453e-05	8.40189e-05	8.89829e-05	8.38568e-05	8.22009e-05	8.58542e-05	7.07448e-05	6.57952e-05	8.81669e-05
		YAR014C	4	13	8	13	14	8	4	10	11	6	16	8	7	9	7	4	3	6	4	3	8	1	1	0	0	3	0	2	3	5							YAR014C	1.41541e-06	4.85792e-06	2.77748e-06	5.69841e-06	6.86547e-06	3.20784e-06	1.75213e-06	4.13712e-06	4.30802e-06	2.09921e-06
		YAR015W	60	59	30	41	30	39	28	30	31	26	24	28	25	24	23	23	27	30	31	31	37	23	18	10	8	3	5	6	590	682							YAR015W	2.12312e-05	2.20475e-05	1.04156e-05	1.79719e-05	1.47117e-05	1.56382e-05	1.22649e-05	1.24114e-05	1.21408e-05	9.09658e-06
		YAR018C	0	0	0	0	0	0	0	0	0	0	0	0	0	0	0	0	0	0	0	0	0	0	0	0	0	0	0	0	0	0							YAR018C	0	0	0	0	0	0	0	0	0	0
		YAR020C	871	810	831	734	572	724	669	734	697	885	829	742	755	828	607	629	846	830	732	791	737	870	556	580	390	404	223	230	481	604							YAR020C	0.000308206	0.000302685	0.000288511	0.000321741	0.000280503	0.000290309	0.000293043	0.000303665	0.000272972	0.000309634
		YAR023C	830	725	841	628	547	717	661	675	657	828	815	775	711	714	703	597	787	732	716	733	651	899	599	522	334	322	184	199	547	651							YAR023C	0.000293698	0.000270922	0.000291983	0.000275277	0.000268244	0.000287503	0.000289539	0.000279256	0.000257306	0.000289691
		YAR027W	834	748	786	646	552	665	628	721	706	867	786	708	700	700	692	635	832	764	736	753	660	864	554	502	311	239	186	182	588	696							YAR027W	0.000295113	0.000279517	0.000272888	0.000283167	0.000270696	0.000266652	0.000275084	0.000298287	0.000276496	0.000303336
		YAR028W	803	798	863	629	585	741	641	671	681	806	821	806	690	751	669	644	852	808	737	825	659	960	569	607	403	366	249	238	593	633							YAR028W	0.000284144	0.000298201	0.000299621	0.000275715	0.000286878	0.000297126	0.000280778	0.000277601	0.000266706	0.000281994
		YAR029W	863	757	858	597	573	658	641	706	626	799	826	716	630	739	651	611	850	785	657	759	607	808	514	415	246	231	117	120	561	701							YAR029W	0.000305375	0.00028288	0.000297885	0.000261689	0.000280994	0.000263845	0.000280778	0.000292081	0.000245165	0.000279545
		YAR030C	972	905	912	789	614	747	741	750	682	929	879	815	798	852	745	670	992	903	782	786	811	978	666	681	501	468	283	270	628	802							YAR030C	0.000343945	0.000338186	0.000316633	0.00034585	0.0003011	0.000299532	0.000324582	0.000310284	0.000267097	0.000325028
		YAR031W	784	711	732	566	499	612	625	623	649	749	698	721	575	657	621	502	733	713	570	727	567	733	461	424	275	242	102	150	485	596							YAR031W	0.000277421	0.000265691	0.00025414	0.0002481	0.000244705	0.0002454	0.00027377	0.000257743	0.000254173	0.000262051
		YAR035C-A	0	0	0	0	0	0	0	0	0	0	0	0	0	0	0	0	0	0	0	0	0	0	0	0	0	0	0	0	0	0							YAR035C-A	0	0	0	0	0	0	0	0	0	0
		YAR035W	914	864	935	741	594	765	657	731	758	944	879	799	719	786	695	687	882	790	676	878	698	885	550	486	371	322	198	188	604	679							YAR035W	0.000323422	0.000322865	0.000324618	0.000324809	0.000291292	0.00030675	0.000287787	0.000302424	0.000296862	0.000330276
		YAR037W	853	821	830	651	585	789	739	702	752	957	872	757	751	806	684	656	817	915	732	866	632	971	523	517	363	313	170	175	540	591							YAR037W	0.000301837	0.000306796	0.000288164	0.000285359	0.000286878	0.000316373	0.000323706	0.000290426	0.000294512	0.000334824
		YAR040C	843	841	893	711	600	852	678	676	716	907	911	886	784	761	728	699	912	894	774	823	770	973	608	573	344	318	194	233	595	690							YAR040C	0.000298298	0.00031427	0.000310037	0.000311659	0.000294234	0.000341635	0.000296986	0.000279669	0.000280413	0.000317331
		YAR042W	0	0	0	0	0	0	0	0	0	0	0	0	0	0	0	0	0	0	0	0	0	0	0	0	0	0	0	0	0	0							YAR042W	0	0	0	0	0	0	0	0	0	0
		YAR043C	834	824	907	633	540	701	627	689	704	875	831	794	703	773	637	620	737	768	528	662	613	763	503	408	342	282	203	184	579	689							YAR043C	0.000295113	0.000307917	0.000314897	0.000277469	0.000264811	0.000281087	0.000274646	0.000285048	0.000275713	0.000306135
		YAR044W	981	973	1078	784	645	801	781	831	783	998	926	848	811	925	800	698	912	943	628	747	754	1037	762	661	601	392	316	352	593	686							YAR044W	0.00034713	0.000363596	0.000374266	0.000343658	0.000316302	0.000321185	0.000342103	0.000343795	0.000306653	0.000349169
		YAR047C	786	692	798	702	633	717	652	698	717	891	834	755	666	729	693	646	888	834	763	808	687	846	584	525	334	315	180	184	603	730							YAR047C	0.000278128	0.000258591	0.000277054	0.000307714	0.000310417	0.000287503	0.000285597	0.000288771	0.000280804	0.000311733
		YAR050W	1000	868	993	717	617	817	721	778	763	903	913	858	779	731	760	723	896	882	720	788	698	877	505	388	324	273	189	227	655	808							YAR050W	0.000353853	0.000324359	0.000344755	0.000314289	0.000302571	0.000327601	0.000315821	0.000321868	0.00029882	0.000315931
		YBL001C	1040	1139	1134	911	840	1087	936	970	1181	1159	1080	1097	1049	1176	1026	953	1458	1352	1983	1954	2088	2342	2034	1847	1741	1658	1082	1180	824	1052							YBL001C	0.000368007	0.000425628	0.000393708	0.000399327	0.000411928	0.000435865	0.000409998	0.000401301	0.000462525	0.000405498
		YBL002W	1272	1263	1219	969	909	1026	919	1075	1132	1285	1205	1189	1067	1120	968	969	1203	1204	1129	1173	1179	1457	1062	814	738	626	403	364	614	826							YBL002W	0.000450101	0.000471965	0.000423219	0.000424751	0.000445765	0.000411405	0.000402551	0.000444741	0.000443334	0.000449581
		YBL003C	1038	878	946	753	686	882	840	871	957	955	1002	961	791	947	809	752	1048	1086	1240	1297	1304	1536	1043	861	649	571	346	341	552	711							YBL003C	0.000367299	0.000328096	0.000328437	0.000330069	0.000336408	0.000353664	0.000367947	0.000360343	0.000374798	0.000334124
		YBL005W	901	915	871	776	662	869	752	815	881	970	894	861	722	886	734	779	923	1008	932	930	867	1131	764	671	515	402	260	282	600	772							YBL005W	0.000318821	0.000341923	0.000302398	0.000340151	0.000324639	0.000348451	0.0003294	0.000337175	0.000345033	0.000339372
		YBL006C	0	0	0	0	0	0	0	0	0	0	0	0	0	0	0	0	0	0	0	0	0	0	0	0	0	0	0	0	0	0							YBL006C	0	0	0	0	0	0	0	0	0	0
		YBL007C	0	0	0	0	0	0	0	0	0	0	0	0	0	0	0	0	0	0	0	0	0	0	0	0	0	0	0	0	0	0							YBL007C	0	0	0	0	0	0	0	0	0	0
		YBL008W	652	591	567	469	398	507	430	477	512	510	552	524	452	430	442	443	398	489	400	464	488	601	516	444	459	306	262	199	549	712							YBL008W	0.000230712	0.000220848	0.000196854	0.000205581	0.000195175	0.000203297	0.000188354	0.000197341	0.000200519	0.000178433
		YBL008W-A	0	0	1	0	0	0	0	0	0	0	0	0	0	0	1	0	0	0	0	0	0	0	0	0	0	0	0	0	0	0							YBL008W-A	0	0	3.47185e-07	0	0	0	0	0	0	0
		YBL009W	1004	987	947	826	807	974	803	872	960	1091	952	940	906	982	840	725	922	955	821	854	787	893	562	507	375	337	195	176	621	692							YBL009W	0.000355268	0.000368828	0.000328785	0.000362068	0.000395745	0.000390554	0.00035174	0.000360757	0.000375973	0.000381706
		YBL010C	1004	948	1048	787	763	933	890	953	915	1001	966	926	831	961	784	708	1158	1081	1115	1135	1075	1319	824	796	558	479	304	269	596	730							YBL010C	0.000355268	0.000354254	0.00036385	0.000344973	0.000374168	0.000374114	0.000389848	0.000394268	0.000358349	0.000350218
		YBL011W	0	0	4	2	0	0	1	1	1	0	0	1	0	2	1	0	0	0	0	0	0	0	0	0	0	0	0	0	0	1							YBL011W	0	0	1.38874e-06	8.76679e-07	0	0	4.38032e-07	4.13712e-07	3.91638e-07	0
		YBL012C	968	954	956	771	697	872	759	722	910	918	888	871	731	870	732	671	1109	1164	1137	1241	993	1312	713	750	397	376	162	215	531	617							YBL012C	0.00034253	0.000356496	0.000331909	0.00033796	0.000341802	0.000349654	0.000332466	0.0002987	0.000356391	0.000321179
		YBL013W	973	909	1051	791	810	877	802	842	897	1009	960	959	865	904	820	742	922	1028	891	881	425	405	183	134	97	101	75	72	581	782							YBL013W	0.000344299	0.00033968	0.000364892	0.000346726	0.000397216	0.000351659	0.000351302	0.000348346	0.000351299	0.000353017
		YBL015W	1000	1026	1110	904	756	948	840	992	954	1193	1044	1031	924	938	814	804	985	1019	860	909	564	694	306	316	169	177	104	168	535	670							YBL015W	0.000353853	0.000383402	0.000385376	0.000396259	0.000370735	0.000380129	0.000367947	0.000410403	0.000373623	0.000417393
		YBL016W	0	0	1	2	0	0	2	1	1	3	0	0	2	0	0	0	0	0	1	0	2	0	0	0	0	0	0	0	0	1							YBL016W	0	0	3.47185e-07	8.76679e-07	0	0	8.76064e-07	4.13712e-07	3.91638e-07	1.04961e-06
		YBL017C	7	11	27	11	12	8	8	26	21	27	16	21	16	15	15	13	7	15	12	10	3	3	6	1	4	6	3	5	3	8							YBL017C	2.47697e-06	4.11054e-06	9.374e-06	4.82173e-06	5.88469e-06	3.20784e-06	3.50425e-06	1.07565e-05	8.2244e-06	9.44645e-06
		YBL019W	0	0	0	0	0	0	1	0	0	0	0	0	0	0	0	0	0	0	0	0	0	0	0	0	0	0	0	0	0	0							YBL019W	0	0	0	0	0	0	4.38032e-07	0	0	0
		YBL021C	0	0	0	0	0	0	0	0	0	0	0	0	0	0	0	0	0	0	0	0	0	0	0	0	0	0	0	0	0	0							YBL021C	0	0	0	0	0	0	0	0	0	0
		YBL022C	0	0	0	0	0	0	0	0	0	0	0	0	0	0	0	0	0	0	0	0	0	0	0	0	0	0	0	0	0	0							YBL022C	0	0	0	0	0	0	0	0	0	0
		YBL024W	4	1	1	3	0	4	4	1	0	1	1	1	2	3	0	0	7	0	2	4	6	3	4	7	2	4	1	0	0	0							YBL024W	1.41541e-06	3.73686e-07	3.47185e-07	1.31502e-06	0	1.60392e-06	1.75213e-06	4.13712e-07	0	3.49868e-07
		YBL025W	1	0	0	0	2	1	0	0	0	0	0	0	0	0	0	0	0	1	0	2	1	2	0	1	0	0	0	0	11	26							YBL025W	3.53853e-07	0	0	0	9.80781e-07	4.0098e-07	0	0	0	0
		YBL027W	257	250	311	228	228	213	174	150	167	211	191	196	146	169	183	133	84	113	42	47	41	39	15	19	16	2	5	4	750	894							YBL027W	9.09402e-05	9.34214e-05	0.000107975	9.99414e-05	0.000111809	8.54087e-05	7.62175e-05	6.20568e-05	6.54036e-05	7.38222e-05
		YBL028C	881	797	894	696	657	682	747	768	801	931	824	816	706	819	631	636	781	869	735	857	766	915	580	577	351	351	191	212	572	666							YBL028C	0.000311744	0.000297828	0.000310384	0.000305084	0.000322187	0.000273468	0.00032721	0.000317731	0.000313702	0.000325728
		YBL029C-A	0	0	0	0	0	0	0	0	0	0	0	0	0	0	0	0	0	0	0	0	0	0	0	0	0	0	0	0	0	0							YBL029C-A	0	0	0	0	0	0	0	0	0	0
		YBL029W	761	817	842	687	615	766	726	789	792	914	839	794	724	803	683	659	798	885	660	768	579	686	412	234	222	242	126	135	554	551							YBL029W	0.000269282	0.000305301	0.00029233	0.000301139	0.00030159	0.000307151	0.000318011	0.000326419	0.000310177	0.00031978
		YBL031W	715	638	730	571	480	586	546	615	646	739	707	728	515	622	605	522	741	754	807	902	894	976	730	628	624	629	443	411	675	761							YBL031W	0.000253005	0.000238412	0.000253445	0.000250292	0.000235387	0.000234974	0.000239165	0.000254433	0.000252998	0.000258553
		YBL032W	887	831	762	607	490	643	665	681	708	903	736	797	709	751	557	585	733	760	750	766	655	874	502	456	290	263	132	126	497	610							YBL032W	0.000313868	0.000310533	0.000264555	0.000266072	0.000240291	0.00025783	0.000291291	0.000281738	0.00027728	0.000315931
		YBL033C	0	0	0	0	0	0	0	0	0	0	0	0	0	0	0	0	0	0	0	0	0	0	0	0	0	0	0	0	0	0							YBL033C	0	0	0	0	0	0	0	0	0	0
		YBL036C	965	962	1050	822	709	869	835	821	886	933	827	882	802	996	824	737	919	846	776	851	655	937	554	561	368	464	180	262	715	875							YBL036C	0.000341468	0.000359486	0.000364545	0.000360315	0.000347687	0.000348451	0.000365757	0.000339658	0.000346991	0.000326427
		YBL037W	35	40	60	42	56	46	55	65	39	81	63	46	63	59	50	50	26	55	32	52	20	21	21	4	5	7	5	4	14	14							YBL037W	1.23849e-05	1.49474e-05	2.08311e-05	1.84102e-05	2.74619e-05	1.84451e-05	2.40918e-05	2.68913e-05	1.52739e-05	2.83393e-05
		YBL038W	238	253	245	186	147	177	170	193	199	198	187	161	180	159	149	159	20	19	9	10	8	12	10	12	9	10	17	8	427	606							YBL038W	8.4217e-05	9.45425e-05	8.50604e-05	8.15311e-05	7.20874e-05	7.09734e-05	7.44654e-05	7.98465e-05	7.7936e-05	6.9274e-05
		YBL039C	0	0	0	0	0	0	0	0	0	0	0	0	0	0	0	0	0	0	0	0	0	0	0	0	0	0	0	0	0	0							YBL039C	0	0	0	0	0	0	0	0	0	0
		YBL039W-A	0	0	0	1	0	0	0	0	0	0	0	0	0	0	0	0	0	0	0	0	0	0	0	0	0	0	0	0	0	0							YBL039W-A	0	0	0	4.38339e-07	0	0	0	0	0	0
		YBL042C	1030	933	1124	832	735	915	824	871	912	1007	982	986	799	867	864	805	1166	1137	1233	1192	1284	1486	958	732	497	422	209	230	714	826							YBL042C	0.000364468	0.000348649	0.000390236	0.000364698	0.000360437	0.000366897	0.000360938	0.000360343	0.000357174	0.000352318
		YBL043W	0	0	5	1	1	2	1	2	0	1	1	0	0	0	1	0	0	0	0	0	0	0	0	0	0	0	0	0	0	0							YBL043W	0	0	1.73593e-06	4.38339e-07	4.90391e-07	8.0196e-07	4.38032e-07	8.27424e-07	0	3.49868e-07
		YBL044W	710	549	614	494	455	550	523	486	594	586	515	504	459	509	433	388	608	530	492	489	437	528	326	349	157	172	106	102	498	649							YBL044W	0.000251236	0.000205154	0.000213172	0.00021654	0.000223128	0.000220539	0.000229091	0.000201064	0.000232633	0.000205023
		YBL045C	274	261	252	171	156	196	175	200	207	212	194	226	150	230	125	146	37	27	16	12	13	8	11	6	19	7	10	11	443	587							YBL045C	9.69557e-05	9.7532e-05	8.74907e-05	7.4956e-05	7.65009e-05	7.8592e-05	7.66556e-05	8.27424e-05	8.10691e-05	7.41721e-05
		YBL046W	664	670	860	655	611	752	679	722	850	858	828	796	722	795	639	608	764	844	708	701	587	634	415	508	301	263	147	148	552	671							YBL046W	0.000234958	0.000250369	0.000298579	0.000287112	0.000299629	0.000301537	0.000297424	0.0002987	0.000332892	0.000300187
		YBL047C	662	601	659	518	404	568	511	498	538	566	574	556	461	510	460	413	789	870	867	934	990	1190	1362	1548	1776	1576	1572	1494	445	607							YBL047C	0.000234251	0.000224585	0.000228795	0.00022706	0.000198118	0.000227757	0.000223834	0.000206029	0.000210701	0.000198026
		YBL048W	895	833	907	710	640	752	694	744	884	894	879	833	755	826	780	680	979	978	983	1158	1219	1451	1154	1048	1090	1069	603	879	572	656							YBL048W	0.000316698	0.00031128	0.000314897	0.000311221	0.00031385	0.000301537	0.000303994	0.000307802	0.000346208	0.000312782
		YBL049W	881	678	787	687	564	685	646	637	738	774	747	721	670	644	603	568	687	780	690	675	756	911	566	507	352	299	218	193	546	699							YBL049W	0.000311744	0.000253359	0.000273235	0.000301139	0.00027658	0.000274671	0.000282969	0.000263535	0.000289029	0.000270798
		YBL051C	684	608	696	449	384	505	376	435	470	522	517	483	436	431	554	447	397	429	174	239	157	232	78	48	55	45	38	53	604	720							YBL051C	0.000242035	0.000227201	0.000241641	0.000196814	0.00018831	0.000202495	0.0001647	0.000179965	0.00018407	0.000182631
		YBL052C	692	615	710	496	415	490	430	539	590	639	625	588	463	518	537	425	481	495	347	325	305	362	244	213	157	118	91	95	548	688							YBL052C	0.000244866	0.000229817	0.000246502	0.000217416	0.000203512	0.00019648	0.000188354	0.000222991	0.000231066	0.000223566
		YBL053W	773	778	911	675	616	684	679	744	795	844	822	726	705	787	686	640	733	751	623	688	532	655	439	399	263	213	158	179	574	600							YBL053W	0.000273528	0.000290728	0.000316286	0.000295879	0.000302081	0.00027427	0.000297424	0.000307802	0.000311352	0.000295289
		YBL054W	0	0	0	0	0	0	0	0	0	0	0	0	0	0	0	0	0	0	0	0	0	0	0	0	0	0	0	0	0	0							YBL054W	0	0	0	0	0	0	0	0	0	0
		YBL055C	0	0	0	0	0	0	0	0	0	0	0	0	0	0	0	0	0	0	0	0	0	0	0	0	0	0	0	0	0	0							YBL055C	0	0	0	0	0	0	0	0	0	0
		YBL056W	0	0	0	0	0	0	0	0	0	0	0	0	0	0	0	0	0	0	0	0	0	0	0	0	0	0	0	0	0	0							YBL056W	0	0	0	0	0	0	0	0	0	0
		YBL057C	833	799	834	669	596	701	673	641	792	809	753	734	691	724	651	605	791	794	724	747	664	898	562	517	428	363	200	199	712	790							YBL057C	0.000294759	0.000298575	0.000289553	0.000293249	0.000292273	0.000281087	0.000294795	0.00026519	0.000310177	0.000283044
		YBL058W	0	0	0	0	0	0	0	0	0	0	0	0	0	0	0	0	0	0	0	0	0	0	0	0	0	0	0	0	0	0							YBL058W	0	0	0	0	0	0	0	0	0	0
		YBL059W	1	1	2	1	1	4	4	1	2	3	2	3	3	2	6	1	2	1	5	3	2	3	2	4	0	1	0	1	2	2							YBL059W	3.53853e-07	3.73686e-07	6.94371e-07	4.38339e-07	4.90391e-07	1.60392e-06	1.75213e-06	4.13712e-07	7.83276e-07	1.04961e-06
		YBL060W	985	954	944	715	703	835	789	722	863	890	902	853	790	862	797	689	973	958	1000	1011	970	1212	721	721	517	448	256	282	735	845							YBL060W	0.000348545	0.000356496	0.000327743	0.000313413	0.000344745	0.000334818	0.000345607	0.0002987	0.000337984	0.000311383
		YBL061C	1032	926	976	817	753	915	878	883	926	1010	1003	962	917	880	855	789	1100	1147	1261	1230	1637	1904	1905	1782	2410	2309	2125	2222	599	689							YBL061C	0.000365176	0.000346033	0.000338853	0.000358123	0.000369264	0.000366897	0.000384592	0.000365308	0.000362657	0.000353367
		YBL062W	1062	1058	1037	764	740	950	856	961	991	1107	1036	994	918	959	905	836	1206	1246	1400	1537	1951	2321	2237	2092	2864	2321	1966	1967	595	825							YBL062W	0.000375792	0.00039536	0.000360031	0.000334891	0.000362889	0.000380931	0.000374955	0.000397577	0.000388113	0.000387304
		YBL063W	858	769	870	726	612	780	690	772	802	825	945	822	740	758	701	661	919	977	976	1001	1034	1162	734	663	519	397	333	233	660	755							YBL063W	0.000303606	0.000287364	0.000302051	0.000318234	0.000300119	0.000312764	0.000302242	0.000319386	0.000314094	0.000288641
		YBL064C	0	1	0	0	2	0	0	0	2	0	4	3	0	2	0	2	1	4	2	0	1	4	2	6	1	1	0	0	0	2							YBL064C	0	3.73686e-07	0	0	9.80781e-07	0	0	0	7.83276e-07	0
		YBL065W	722	645	718	534	458	541	510	497	489	588	514	507	399	446	557	545	644	640	650	751	822	1026	749	548	519	455	337	363	542	582							YBL065W	0.000255482	0.000241027	0.000249279	0.000234073	0.000224599	0.00021693	0.000223396	0.000205615	0.000191511	0.000205723
		YBL066C	0	0	0	0	0	0	0	0	0	0	0	0	0	0	0	0	0	0	0	0	0	0	0	0	0	0	0	0	0	0							YBL066C	0	0	0	0	0	0	0	0	0	0
		YBL067C	573	538	597	457	404	515	454	456	520	529	479	494	377	447	379	383	323	323	218	241	190	221	138	90	111	106	73	65	590	780							YBL067C	0.000202758	0.000201043	0.00020727	0.000200321	0.000198118	0.000206505	0.000198866	0.000188653	0.000203652	0.00018508
		YBL068W	895	795	920	706	577	726	711	699	699	821	736	685	683	690	662	641	891	826	904	929	920	1095	768	594	549	483	404	318	640	766							YBL068W	0.000316698	0.00029708	0.000319411	0.000309468	0.000282955	0.000291111	0.000311441	0.000289185	0.000273755	0.000287242
		YBL069W	793	753	846	673	584	758	624	652	730	847	753	763	743	810	681	633	761	797	714	671	626	776	480	383	296	272	180	138	566	737							YBL069W	0.000280605	0.000281385	0.000293719	0.000295002	0.000286388	0.000303943	0.000273332	0.00026974	0.000285896	0.000296339
		YBL070C	0	0	0	0	0	0	0	1	0	0	0	0	0	0	0	0	0	0	0	0	0	0	0	0	0	0	0	0	0	0							YBL070C	0	0	0	0	0	0	0	4.13712e-07	0	0
		YBL071C	709	636	695	502	453	555	466	538	518	551	574	528	484	488	442	469	573	548	436	462	530	649	604	633	401	379	223	200	556	703							YBL071C	0.000250882	0.000237664	0.000241294	0.000220046	0.000222147	0.000222544	0.000204123	0.000222577	0.000202869	0.000192778
		YBL071C-B	0	0	0	0	0	0	0	0	0	0	0	0	0	0	0	0	0	0	0	0	0	0	0	0	0	0	0	0	0	0							YBL071C-B	0	0	0	0	0	0	0	0	0	0
		YBL071W-A	0	0	0	0	0	0	0	0	0	0	0	0	0	0	0	0	0	0	0	0	0	0	0	0	0	0	0	0	0	0							YBL071W-A	0	0	0	0	0	0	0	0	0	0
		YBL072C	0	0	0	0	0	0	0	0	0	0	0	0	0	0	0	0	0	0	0	0	0	0	0	0	0	0	0	0	0	0							YBL072C	0	0	0	0	0	0	0	0	0	0
		YBL075C	993	974	1033	776	729	849	797	773	886	1043	952	882	809	857	750	725	848	1002	923	993	891	1065	596	561	339	270	248	263	618	788							YBL075C	0.000351376	0.00036397	0.000358642	0.000340151	0.000357495	0.000340432	0.000349111	0.0003198	0.000346991	0.000364913
		YBL078C	726	693	692	564	506	641	635	657	644	717	663	619	603	663	524	507	609	542	412	466	406	530	340	340	203	167	122	122	618	708							YBL078C	0.000256897	0.000258964	0.000240252	0.000247223	0.000248138	0.000257028	0.00027815	0.000271809	0.000252215	0.000250856
		YBL079W	118	128	103	87	34	29	23	27	11	12	12	12	5	6	35	34	48	24	55	75	98	78	150	106	187	163	147	155	443	483							YBL079W	4.17546e-05	4.78318e-05	3.57601e-05	3.81355e-05	1.66733e-05	1.16284e-05	1.00747e-05	1.11702e-05	4.30802e-06	4.19842e-06
		YBL080C	264	270	257	247	171	204	173	196	183	258	169	175	147	174	167	153	38	22	18	13	21	9	9	22	11	7	5	9	461	569							YBL080C	9.34172e-05	0.000100895	8.92266e-05	0.00010827	8.38568e-05	8.17999e-05	7.57795e-05	8.10876e-05	7.16698e-05	9.02661e-05
		YBL081W	0	0	0	0	0	0	0	0	0	0	0	0	0	0	0	0	0	0	0	0	0	0	0	0	0	0	0	0	0	0							YBL081W	0	0	0	0	0	0	0	0	0	0
		YBL082C	265	397	401	302	258	373	339	365	251	394	355	399	335	363	335	273	280	337	268	225	170	160	199	66	145	144	113	117	175	188							YBL082C	9.3771e-05	0.000148353	0.000139221	0.000132378	0.000126521	0.000149565	0.000148493	0.000151005	9.83012e-05	0.000137848
		YBL083C	0	0	0	0	0	0	0	0	0	0	0	0	0	0	0	0	0	0	0	0	0	0	0	0	0	0	0	0	0	1							YBL083C	0	0	0	0	0	0	0	0	0	0
		YBL085W	0	0	0	0	0	0	0	0	0	0	0	0	0	1	0	0	0	0	0	0	0	0	0	0	0	0	0	0	0	0							YBL085W	0	0	0	0	0	0	0	0	0	0
		YBL086C	910	837	859	746	664	748	699	789	838	895	912	842	717	768	692	660	837	867	634	646	279	253	113	81	83	75	56	76	592	768							YBL086C	0.000322006	0.000312775	0.000298232	0.000327001	0.000325619	0.000299933	0.000306184	0.000326419	0.000328193	0.000313132
		YBL087C	0	0	0	0	0	0	0	0	0	0	0	0	0	0	0	0	0	0	0	0	0	0	0	0	0	0	0	0	0	0							YBL087C	0	0	0	0	0	0	0	0	0	0
		YBL088C	896	833	839	658	603	739	645	805	782	801	820	754	633	770	703	618	876	868	860	956	1079	1326	1049	973	962	864	778	702	542	763							YBL088C	0.000317052	0.00031128	0.000291288	0.000288427	0.000295706	0.000296324	0.000282531	0.000333038	0.000306261	0.000280245
		YBL089W	504	445	478	413	323	360	395	427	421	448	366	410	422	387	376	332	302	238	202	242	95	138	66	48	61	42	28	21	654	804							YBL089W	0.000178342	0.00016629	0.000165955	0.000181034	0.000158396	0.000144353	0.000173023	0.000176655	0.00016488	0.000156741
		YBL090W	247	212	210	170	144	218	173	156	174	221	144	192	162	141	138	133	21	24	12	20	8	16	8	8	12	10	13	5	425	575							YBL090W	8.74017e-05	7.92214e-05	7.29089e-05	7.45177e-05	7.06162e-05	8.74136e-05	7.57795e-05	6.45391e-05	6.8145e-05	7.73209e-05
		YBL091C	910	822	896	688	617	729	710	650	751	720	774	727	587	728	682	599	833	854	794	905	916	1130	685	596	414	388	183	216	640	865							YBL091C	0.000322006	0.00030717	0.000311078	0.000301577	0.000302571	0.000292314	0.000311003	0.000268913	0.00029412	0.000251905
		YBL091C-A	0	0	0	0	0	0	0	0	0	0	0	0	0	0	0	0	0	0	0	0	0	0	0	0	0	0	0	0	0	0							YBL091C-A	0	0	0	0	0	0	0	0	0	0
		YBL093C	0	0	0	0	0	0	0	0	0	0	0	0	0	0	0	0	0	0	0	0	0	0	1	0	0	1	0	0	0	0							YBL093C	0	0	0	0	0	0	0	0	0	0
		YBL094C	0	0	0	0	1	0	0	0	0	0	0	0	0	1	0	0	0	0	0	0	0	0	0	0	0	0	0	0	0	0							YBL094C	0	0	0	0	4.90391e-07	0	0	0	0	0
		YBL095W	855	809	932	686	597	731	747	697	782	881	782	749	671	792	613	580	833	768	717	790	702	839	512	440	290	277	130	156	603	741							YBL095W	0.000302544	0.000302312	0.000323577	0.000300701	0.000292763	0.000293116	0.00032721	0.000288357	0.000306261	0.000308234
		YBL096C	1	2	0	1	0	0	0	2	0	1	0	2	0	3	3	0	2	1	2	0	0	0	0	0	0	0	0	0	1	5							YBL096C	3.53853e-07	7.47372e-07	0	4.38339e-07	0	0	0	8.27424e-07	0	3.49868e-07
		YBL098W	918	827	846	652	594	789	680	685	810	900	815	758	662	808	673	612	709	809	640	765	619	787	532	540	310	250	156	154	545	657							YBL098W	0.000324837	0.000309038	0.000293719	0.000285797	0.000291292	0.000316373	0.000297862	0.000283393	0.000317227	0.000314882
		YBL099W	216	158	212	140	131	174	144	128	133	170	129	118	78	89	132	101	27	23	17	20	17	8	11	9	6	6	9	2	388	452							YBL099W	7.64322e-05	5.90424e-05	7.36033e-05	6.13675e-05	6.42412e-05	6.97705e-05	6.30766e-05	5.29552e-05	5.20879e-05	5.94776e-05
		YBL100C	233	233	206	147	124	147	133	123	150	135	139	156	125	116	148	117	18	25	12	19	25	12	15	15	13	9	11	10	475	589							YBL100C	8.24477e-05	8.70688e-05	7.15202e-05	6.44359e-05	6.08084e-05	5.8944e-05	5.82582e-05	5.08866e-05	5.87457e-05	4.72322e-05
		YBL101C	1122	1008	1151	914	818	1025	922	922	1000	1120	1060	1062	1015	1142	1003	815	1111	1105	1043	1076	934	1092	689	632	411	326	244	247	657	734							YBL101C	0.000397023	0.000376675	0.00039961	0.000400642	0.000401139	0.000411004	0.000403865	0.000381443	0.000391638	0.000391853
		YBL101W-C	0	0	0	0	0	0	0	0	0	0	0	0	0	0	0	0	0	0	0	0	0	0	0	0	0	0	0	0	0	0							YBL101W-C	0	0	0	0	0	0	0	0	0	0
		YBL102W	911	806	859	696	647	754	705	744	802	896	809	822	697	772	706	633	833	835	714	752	568	810	510	487	345	256	151	197	600	685							YBL102W	0.00032236	0.000301191	0.000298232	0.000305084	0.000317283	0.000302339	0.000308812	0.000307802	0.000314094	0.000313482
		YBL103C	730	700	719	536	389	558	372	410	355	376	261	265	162	164	465	470	769	764	1022	1144	1376	1787	2664	2614	5119	4456	5621	5630	542	603							YBL103C	0.000258313	0.00026158	0.000249626	0.00023495	0.000190762	0.000223747	0.000162948	0.000169622	0.000139032	0.000131551
		YBL104C	0	0	0	0	0	0	0	0	0	0	0	0	0	0	0	0	0	0	0	0	0	0	0	0	0	0	0	0	0	0							YBL104C	0	0	0	0	0	0	0	0	0	0
		YBL106C	813	865	919	772	617	776	777	762	756	843	843	831	787	763	752	705	789	829	727	779	618	748	458	394	290	247	154	179	617	751							YBL106C	0.000287682	0.000323238	0.000319063	0.000338398	0.000302571	0.00031116	0.000340351	0.000315249	0.000296078	0.000294939
		YBL107C	905	796	982	793	619	844	699	815	808	948	916	904	804	830	701	702	883	862	742	754	693	865	565	468	341	290	151	187	639	726							YBL107C	0.000320237	0.000297454	0.000340936	0.000347603	0.000303552	0.000338427	0.000306184	0.000337175	0.000316444	0.000331675
		YBR001C	1093	1025	1087	835	821	931	892	995	1073	1183	976	1023	895	997	882	753	1061	1094	927	1061	931	1168	914	716	669	552	381	418	672	792							YBR001C	0.000386761	0.000383028	0.00037739	0.000366013	0.000402611	0.000373312	0.000390724	0.000411644	0.000420228	0.000413894
		YBR003W	255	305	303	259	213	274	242	296	210	300	240	293	225	255	187	190	49	33	20	26	20	11	10	4	12	13	9	14	299	320							YBR003W	9.02325e-05	0.000113974	0.000105197	0.00011353	0.000104453	0.000109868	0.000106004	0.000122459	8.2244e-05	0.000104961
		YBR005W	980	915	986	758	720	905	815	819	973	1028	919	880	751	889	813	717	918	933	822	867	786	890	562	493	344	285	200	193	609	758							YBR005W	0.000346776	0.000341923	0.000342325	0.000332261	0.000353081	0.000362887	0.000356996	0.00033883	0.000381064	0.000359665
		YBR006W	1151	1000	1087	903	817	942	991	933	1032	1172	1062	1039	971	992	875	821	979	1066	961	879	755	981	536	496	368	358	163	206	647	768							YBR006W	0.000407285	0.000373686	0.00037739	0.00039582	0.000400649	0.000377723	0.00043409	0.000385994	0.00040417	0.000410046
		YBR007C	917	838	826	679	669	780	713	834	796	893	808	781	713	817	700	578	715	783	537	669	565	632	388	358	254	226	147	169	523	632							YBR007C	0.000324483	0.000313149	0.000286775	0.000297632	0.000328071	0.000312764	0.000312317	0.000345036	0.000311744	0.000312433
		YBR008C	0	0	0	0	0	0	0	0	0	0	0	0	0	0	0	0	0	0	0	0	0	0	0	0	0	0	0	0	0	1							YBR008C	0	0	0	0	0	0	0	0	0	0
		YBR009C	846	816	814	644	587	712	632	690	811	860	815	728	699	797	585	590	593	660	511	544	476	616	345	370	206	214	123	120	534	676							YBR009C	0.00029936	0.000304928	0.000282609	0.00028229	0.000287859	0.000285498	0.000276836	0.000285461	0.000317618	0.000300887
		YBR010W	931	852	799	796	669	792	663	797	776	931	761	782	703	825	692	619	643	636	580	591	600	671	512	444	354	308	157	143	557	702							YBR010W	0.000329437	0.00031838	0.000277401	0.000348918	0.000328071	0.000317576	0.000290415	0.000329729	0.000303911	0.000325728
		YBR012C	801	756	818	714	585	708	641	730	807	813	798	775	712	753	591	614	747	771	652	739	591	665	448	448	286	280	190	164	548	651							YBR012C	0.000283436	0.000282506	0.000283998	0.000312974	0.000286878	0.000283894	0.000280778	0.00030201	0.000316052	0.000284443
		YBR013C	1127	1035	1173	920	798	932	889	902	1037	1098	1057	1087	796	953	907	811	1039	1073	935	976	875	1109	654	629	424	379	286	263	604	721							YBR013C	0.000398792	0.000386765	0.000407248	0.000403272	0.000391332	0.000373713	0.00038941	0.000373168	0.000406129	0.000384156
		YBR014C	1947	1666	1884	1530	1449	1698	1597	1668	1897	2126	1959	1840	1662	1912	1531	1385	1683	1780	1545	1717	1493	1759	1044	1033	722	644	380	416	1143	1468							YBR014C	0.000688952	0.000622561	0.000654097	0.000670659	0.000710576	0.000680864	0.000699537	0.000690072	0.000742937	0.00074382
		YBR015C	1	1	1	0	1	0	1	0	0	2	1	1	0	0	1	1	1	0	0	0	0	0	0	0	0	0	0	0	0	0							YBR015C	3.53853e-07	3.73686e-07	3.47185e-07	0	4.90391e-07	0	4.38032e-07	0	0	6.99737e-07
		YBR016W	2316	2283	2301	1900	1738	2119	1789	2081	2168	2359	2214	2233	1940	2281	1823	1785	2086	2124	1830	2033	1737	2062	1307	1261	872	670	521	531	1170	1448							YBR016W	0.000819523	0.000853125	0.000798873	0.000832845	0.000852299	0.000849676	0.000783639	0.000860935	0.000849071	0.00082534
		YBR017C	0	0	0	0	0	0	0	0	0	0	0	0	0	0	0	0	0	0	0	0	0	0	0	0	0	0	0	0	0	0							YBR017C	0	0	0	0	0	0	0	0	0	0
		YBR018C	2921	2798	3129	2505	2313	2661	2547	2705	3018	3313	2991	2976	2544	2831	2569	2225	2984	3080	2660	2912	2589	3059	1942	1937	1235	1090	693	718	1694	2187							YBR018C	0.0010336	0.00104557	0.00108634	0.00109804	0.00113427	0.00106701	0.00111567	0.00111909	0.00118196	0.00115911
		YBR019C	118	113	126	105	108	122	126	125	156	153	130	151	136	140	134	105	141	148	116	133	109	106	81	64	54	41	29	28	84	102							YBR019C	4.17546e-05	4.22265e-05	4.37454e-05	4.60256e-05	5.29622e-05	4.89195e-05	5.5192e-05	5.1714e-05	6.10955e-05	5.35299e-05
		YBR020W	2198	2064	2212	1732	1596	1930	1861	1939	2205	2284	2116	2031	1880	2125	1773	1739	2132	2174	1935	2094	1827	2187	1426	1199	968	780	509	540	1417	1651							YBR020W	0.000777769	0.000771287	0.000767974	0.000759204	0.000782663	0.000773891	0.000815177	0.000802188	0.000863562	0.0007991
		YBR021W	0	0	0	0	0	0	0	0	0	0	0	0	0	0	0	0	0	0	0	0	0	0	0	0	0	0	0	0	0	0							YBR021W	0	0	0	0	0	0	0	0	0	0
		YBR022W	1714	1633	1836	1419	1325	1485	1340	1589	1659	1865	1668	1678	1358	1604	1363	1226	1692	1838	1514	1645	1328	1683	1051	1003	629	664	468	491	997	1061							YBR022W	0.000606504	0.000610229	0.000637432	0.000622003	0.000649767	0.000595455	0.000586963	0.000657389	0.000649728	0.000652505
		YBR023C	6	4	5	0	5	1	3	3	2	2	1	0	1	1	2	3	4	4	1	3	3	11	5	26	0	2	7	8	0	2							YBR023C	2.12312e-06	1.49474e-06	1.73593e-06	0	2.45195e-06	4.0098e-07	1.3141e-06	1.24114e-06	7.83276e-07	6.99737e-07
		YBR024W	2289	1991	2175	1765	1539	1905	1791	1779	2011	2142	2022	2056	1813	1888	1745	1605	2133	2130	2051	2085	1419	1540	998	829	894	770	494	528	1134	1408							YBR024W	0.000809969	0.000744008	0.000755128	0.000773669	0.000754711	0.000763867	0.000784515	0.000735994	0.000787584	0.000749418
		YBR025C	1286	1103	1094	909	691	853	669	749	702	802	683	676	536	603	779	771	821	892	771	863	686	881	679	559	421	332	172	200	958	1116							YBR025C	0.000455055	0.000412175	0.000379821	0.00039845	0.00033886	0.000342036	0.000293043	0.00030987	0.00027493	0.000280595
		YBR026C	0	0	0	0	0	0	0	0	0	1	0	0	0	0	0	0	0	0	0	0	0	0	0	0	0	0	0	0	0	0							YBR026C	0	0	0	0	0	0	0	0	0	3.49868e-07
		YBR027C	3840	3570	4031	3196	2883	3241	3185	3303	3533	4157	3555	3726	3236	3458	3143	2962	3718	3828	3181	3478	2936	3678	2466	2019	1651	1266	901	820	2388	2815							YBR027C	0.0013588	0.00133406	0.0013995	0.00140093	0.0014138	0.00129958	0.00139513	0.00136649	0.00138366	0.0014544
		YBR028C	1763	1620	1787	1461	1319	1523	1411	1529	1599	1742	1631	1541	1428	1524	1399	1291	1449	1666	1448	1592	1421	1756	1067	1077	740	621	331	342	1206	1327							YBR028C	0.000623843	0.000605371	0.00062042	0.000640414	0.000646825	0.000610692	0.000618063	0.000632566	0.000626229	0.000609471
		YBR030W	1106	911	1043	872	740	928	768	855	936	1082	883	982	877	932	839	731	1002	1004	949	1061	1139	1458	1728	1686	2136	2628	2749	2520	659	798							YBR030W	0.000391361	0.000340428	0.000362114	0.000382232	0.000362889	0.000372109	0.000336408	0.000353724	0.000366573	0.000378558
		YBR031W	1573	1421	1386	1116	937	1219	1040	1063	1027	1174	1008	1042	923	977	989	884	1436	1520	1653	1606	1590	1974	1407	1201	757	562	302	285	1088	1170							YBR031W	0.000556611	0.000531008	0.000481199	0.000489187	0.000459496	0.000488794	0.000455553	0.000439776	0.000402212	0.000410746
		YBR032W	2797	2626	2690	2174	2021	2364	2163	2324	2608	2744	2571	2570	2290	2391	2158	2096	2500	2648	2182	2522	2256	2560	1557	1300	940	826	582	538	1705	1941							YBR032W	0.000989727	0.000981299	0.000933929	0.00095295	0.000991079	0.000947916	0.000947463	0.000961467	0.00102139	0.000960039
		YBR033W	2083	2123	2189	1791	1557	1941	1704	1851	1933	2192	2076	2089	1758	1973	1802	1704	2041	2070	1732	1918	1584	1920	1351	1219	749	649	385	482	1339	1573							YBR033W	0.000737076	0.000793335	0.000759989	0.000785066	0.000763538	0.000778302	0.000746406	0.000765781	0.000757036	0.000766912
		YBR034C	1949	1840	1897	1468	1336	1662	1442	1620	1651	1803	1683	1683	1360	1626	1417	1215	2735	2746	3549	4001	2920	3518	2234	1982	1903	1614	965	1139	990	1107							YBR034C	0.000689659	0.000687582	0.000658611	0.000643482	0.000655162	0.000666428	0.000631642	0.000670214	0.000646594	0.000630813
		YBR035C	846	812	777	613	612	717	627	654	703	925	753	768	619	723	569	535	666	697	533	543	252	300	150	133	82	85	55	77	601	749							YBR035C	0.00029936	0.000303433	0.000269763	0.000268702	0.000300119	0.000287503	0.000274646	0.000270568	0.000275322	0.000323628
		YBR036C	1392	1388	1220	988	805	914	726	771	777	791	694	741	744	883	1011	1009	315	323	298	291	187	145	59	71	47	47	45	40	1837	2352							YBR036C	0.000492563	0.000518676	0.000423566	0.000433079	0.000394764	0.000366496	0.000318011	0.000318972	0.000304303	0.000276746
		YBR037C	328	279	298	241	235	242	225	248	212	271	264	260	219	255	208	187	48	55	30	24	18	15	26	17	15	20	7	11	397	575							YBR037C	0.000116064	0.000104258	0.000103461	0.00010564	0.000115242	9.70371e-05	9.85572e-05	0.000102601	8.30273e-05	9.48144e-05
		YBR039W	0	0	0	0	0	1	0	0	0	0	0	0	0	0	0	0	0	0	0	0	0	0	0	0	0	0	0	0	0	0							YBR039W	0	0	0	0	0	4.0098e-07	0	0	0	0
		YBR040W	1816	1577	1870	1385	1255	1575	1501	1599	1630	1864	1617	1651	1503	1703	1389	1279	1641	1647	1370	1535	1339	1667	1075	955	609	607	372	404	1022	1189							YBR040W	0.000642597	0.000589302	0.000649237	0.0006071	0.00061544	0.000631543	0.000657486	0.000661526	0.00063837	0.000652155
		YBR041W	1346	1285	1380	1187	1002	1281	1203	1178	1355	1468	1269	1281	1106	1158	1143	1113	1526	1540	1333	1511	1405	1861	1499	1298	1328	1124	885	930	1039	1324							YBR041W	0.000476286	0.000480186	0.000479116	0.000520309	0.000491371	0.000513655	0.000526952	0.000487353	0.00053067	0.000513607
		YBR042C	0	0	0	0	0	0	0	0	0	0	0	3	0	0	0	0	0	0	0	1	0	0	0	0	0	1	1	0	0	0							YBR042C	0	0	0	0	0	0	0	0	0	0
		YBR043C	2001	1885	2166	1695	1486	1788	1741	1836	1982	2134	1985	1999	1761	2019	1686	1548	2006	2019	1767	2023	1675	2115	1401	1216	906	820	463	480	1166	1365							YBR043C	0.00070806	0.000704398	0.000752003	0.000742985	0.00072872	0.000716952	0.000762613	0.000759576	0.000776227	0.000746619
		YBR044C	797	965	1111	916	752	942	901	940	866	1160	1024	1062	878	1009	826	760	871	1055	976	992	648	572	502	114	395	386	200	241	364	386							YBR044C	0.000282021	0.000360607	0.000385723	0.000401519	0.000368774	0.000377723	0.000394667	0.00038889	0.000339159	0.000405847
		YBR045C	2121	2028	2123	1863	1592	2035	1862	1933	1959	2198	2134	2165	1751	1985	1820	1685	2067	2092	1705	2038	1735	2102	1323	1056	870	789	575	487	1282	1484							YBR045C	0.000750522	0.000757835	0.000737074	0.000816626	0.000780702	0.000815994	0.000815615	0.000799706	0.000767219	0.000769011
		YBR046C	3213	3283	3354	2657	2397	2956	2787	2870	3192	3481	3319	3176	2845	3151	2691	2477	3097	3194	2739	3006	2668	3162	1990	1894	1311	1159	757	738	1944	2256							YBR046C	0.00113693	0.00122681	0.00116446	0.00116467	0.00117547	0.0011853	0.00122079	0.00118735	0.00125011	0.00121789
		YBR047W	2093	1803	2038	1634	1552	1762	1636	1792	1954	2199	1916	2049	1706	1941	1582	1577	1830	1912	1678	1855	1509	1848	1143	1170	690	694	414	423	1189	1434							YBR047W	0.000740614	0.000673755	0.000707564	0.000716246	0.000761086	0.000706526	0.00071662	0.000741372	0.000765261	0.000769361
		YBR048W	554	513	410	338	268	284	239	242	242	260	212	182	133	173	326	273	280	328	445	459	604	722	866	749	372	286	89	71	488	669							YBR048W	0.000196035	0.000191701	0.000142346	0.000148159	0.000131425	0.000113878	0.00010469	0.000100118	9.47764e-05	9.09658e-05
		YBR050C	1907	1888	1986	1729	1409	1748	1573	1736	1772	2190	1876	1909	1687	1831	1576	1514	1795	1868	1572	1688	1437	1879	1213	1068	845	893	531	690	1145	1345							YBR050C	0.000674797	0.000705519	0.00068951	0.000757889	0.00069096	0.000700913	0.000689024	0.000718204	0.000693983	0.000766212
		YBR051W	2025	1833	2022	1576	1378	1673	1624	1647	1748	2038	1867	1853	1496	1702	1447	1369	1507	1549	1224	1373	1092	1244	775	675	480	488	243	322	1125	1379							YBR051W	0.000716552	0.000684966	0.000702009	0.000690823	0.000675758	0.000670839	0.000711364	0.000681384	0.000684583	0.000713032
		YBR052C	1642	1478	1632	1346	1209	1412	1386	1455	1520	1695	1661	1564	1232	1463	1268	1149	1479	1564	1198	1316	1041	1251	767	656	477	418	316	271	1006	1297							YBR052C	0.000581026	0.000552308	0.000566606	0.000590005	0.000592882	0.000566184	0.000607112	0.000601951	0.00059529	0.000593027
		YBR053C	1966	1895	1949	1609	1416	1734	1618	1721	1834	2099	1961	1911	1600	1749	1694	1378	1849	1937	1586	1770	1480	1844	1126	897	796	636	395	443	1178	1350							YBR053C	0.000695675	0.000708135	0.000676664	0.000705288	0.000694393	0.000695299	0.000708736	0.000711999	0.000718264	0.000734374
		YBR054W	2074	1955	2098	1609	1637	1805	1677	1887	1946	2249	2033	2005	1685	2059	1707	1629	1997	1916	1791	1872	1564	2054	1272	1076	874	806	486	508	1185	1442							YBR054W	0.000733891	0.000730556	0.000728395	0.000705288	0.000802769	0.000723769	0.000734579	0.000780675	0.000762128	0.000786854
		YBR056W	1349	1531	1656	1392	1203	1481	1395	1554	1359	1716	1583	1523	1422	1469	1345	1161	1324	1555	1222	1315	959	1022	702	315	499	497	296	324	669	742							YBR056W	0.000477348	0.000572113	0.000574939	0.000610168	0.00058994	0.000593851	0.000611054	0.000642909	0.000532236	0.000600374
		YBR056W-A	0	0	0	0	0	0	0	0	0	0	0	0	0	0	0	0	0	0	0	0	0	0	0	0	0	0	0	0	0	0							YBR056W-A	0	0	0	0	0	0	0	0	0	0
		YBR057C	1711	1519	1727	1370	1207	1518	1312	1431	1593	1580	1559	1535	1329	1410	1280	1191	1380	1480	1141	1328	1131	1453	1033	873	640	631	371	318	1034	1223							YBR057C	0.000605442	0.000567629	0.000599589	0.000600525	0.000591901	0.000608687	0.000574698	0.000592022	0.000623879	0.000552792
		YBR058C	1574	1401	1400	1235	1113	1336	1137	1212	1313	1415	1288	1306	1254	1235	1059	1080	2088	2083	2814	2957	2469	2880	1768	1993	1297	1041	650	656	1047	1285							YBR058C	0.000556964	0.000523534	0.000486059	0.000541349	0.000545805	0.000535709	0.000498042	0.000501419	0.000514221	0.000495064
		YBR058C-A	0	0	0	0	0	0	0	0	0	0	0	0	0	0	0	0	0	0	0	0	0	0	0	0	0	0	0	0	0	0							YBR058C-A	0	0	0	0	0	0	0	0	0	0
		YBR059C	2025	1976	1969	1591	1398	1827	1574	1807	1963	2129	1970	1956	1597	1883	1616	1520	2378	2438	2786	2919	3518	4341	5942	5117	8464	6185	7051	6732	1143	1436							YBR059C	0.000716552	0.000738403	0.000683608	0.000697398	0.000685566	0.00073259	0.000689462	0.000747578	0.000768786	0.00074487
		YBR061C	240	224	224	197	131	177	150	154	150	192	159	173	112	150	57	81	33	30	46	72	50	54	44	29	24	17	17	20	369	497							YBR061C	8.49247e-05	8.37056e-05	7.77695e-05	8.63528e-05	6.42412e-05	7.09734e-05	6.57048e-05	6.37117e-05	5.87457e-05	6.71747e-05
		YBR062C	0	0	0	0	0	0	0	0	0	0	0	0	0	0	0	0	0	0	0	0	0	0	0	0	0	0	0	0	0	0							YBR062C	0	0	0	0	0	0	0	0	0	0
		YBR063C	1974	1808	2039	1501	1439	1641	1641	1667	1770	2070	1938	1828	1561	1695	1519	1438	1920	2023	1857	2088	1676	2157	1352	1332	864	717	395	419	955	1220							YBR063C	0.000698506	0.000675624	0.000707911	0.000657947	0.000705672	0.000658008	0.00071881	0.000689658	0.000693199	0.000724228
		YBR064W	1930	1862	1968	1635	1512	1666	1558	1685	1866	2037	1955	1828	1691	1659	1567	1401	1781	1993	1580	1700	1451	1750	1243	1080	861	680	434	467	1201	1377							YBR064W	0.000682936	0.000695803	0.000683261	0.000716685	0.000741471	0.000668032	0.000682454	0.000697105	0.000730797	0.000712682
		YBR065C	2061	1944	1957	1603	1591	1899	1671	1821	1932	2086	1920	1847	1667	1937	1645	1494	1832	1952	1655	1800	1492	1849	1054	1111	734	675	412	465	1237	1579							YBR065C	0.000729291	0.000726445	0.000679442	0.000702658	0.000780211	0.000761461	0.000731951	0.00075337	0.000756645	0.000729826
		YBR066C	2121	2008	2179	1807	1510	1945	1848	1901	2248	2326	2246	2168	2024	2152	1730	1589	2220	2261	2222	2316	2494	2930	2389	2098	1898	1683	1063	1098	1279	1445							YBR066C	0.000750522	0.000750361	0.000756517	0.000792079	0.00074049	0.000779906	0.000809483	0.000786467	0.000880402	0.000813794
		YBR067C	2245	2368	2534	2099	1882	2279	2104	2141	2535	2582	2469	2235	2277	2486	2117	2127	2255	2338	1962	2132	1632	2072	1236	1155	823	735	502	518	1608	2039							YBR067C	0.0007944	0.000884888	0.000879768	0.000920074	0.000922915	0.000913833	0.000921619	0.000885758	0.000992802	0.00090336
		YBR068C	1939	1796	2004	1607	1424	1748	1640	1712	1863	2077	1894	1883	1578	1786	1531	1390	1810	1871	1591	1778	1420	1828	1114	1016	780	648	417	373	1022	1310							YBR068C	0.000686121	0.00067114	0.000695759	0.000704411	0.000698316	0.000700913	0.000718372	0.000708275	0.000729622	0.000726677
		YBR069C	959	892	788	726	669	828	768	738	756	838	810	813	597	695	748	690	1295	1300	1685	1750	1369	1687	1410	893	1390	1302	999	1022	537	618							YBR069C	0.000339345	0.000333328	0.000273582	0.000318234	0.000328071	0.000332011	0.000336408	0.00030532	0.000296078	0.00029319
		YBR071W	2115	1994	2056	1788	1642	1847	1857	1837	2075	2395	2151	2191	1968	2118	1744	1552	2217	2060	1811	2116	1796	2099	1254	1007	774	707	438	542	1231	1556							YBR071W	0.000748399	0.000745129	0.000713813	0.000783751	0.000805221	0.00074061	0.000813425	0.000759989	0.000812649	0.000837935
		YBR072C-A	0	0	0	0	0	0	0	0	0	0	0	0	0	0	0	0	0	0	0	0	0	0	0	0	0	0	0	0	0	0							YBR072C-A	0	0	0	0	0	0	0	0	0	0
		YBR072W	2673	2366	2599	2097	1876	2226	2130	2219	2375	2685	2550	2442	2105	2300	2038	1853	2335	2444	2046	2119	1936	2341	1628	1481	1134	947	651	604	1509	1711							YBR072W	0.000945849	0.000884141	0.000902335	0.000919197	0.000919973	0.000892581	0.000933008	0.000918027	0.00093014	0.000939397
		YBR073W	1989	1848	2013	1546	1483	1665	1559	1705	1821	1916	1868	1810	1652	1812	1484	1403	1720	1917	1684	1809	1479	1946	1285	1186	779	701	487	484	1183	1414							YBR073W	0.000703813	0.000690571	0.000698884	0.000677672	0.000727249	0.000667631	0.000682892	0.000705379	0.000713173	0.000670348
		YBR074W	0	0	0	0	0	0	0	0	0	0	0	0	0	0	0	0	0	0	0	0	0	0	0	0	0	0	0	0	0	0							YBR074W	0	0	0	0	0	0	0	0	0	0
		YBR075W	0	0	0	0	0	0	0	0	0	0	0	0	0	0	0	0	0	0	0	0	0	0	0	0	0	0	0	0	0	0							YBR075W	0	0	0	0	0	0	0	0	0	0
		YBR076W	1941	2084	2095	1564	1585	1944	1692	1826	2104	2038	1961	1961	1776	1923	1729	1536	1845	2021	1719	1812	1593	1889	1279	1075	847	691	466	486	1265	1496							YBR076W	0.000686828	0.000778761	0.000727353	0.000685563	0.000777269	0.000779505	0.00074115	0.000755439	0.000824006	0.000713032
		YBR077C	1260	1159	1111	799	781	921	921	934	966	1185	921	972	818	1000	906	830	1055	1134	2425	2329	3960	4428	5255	3747	3404	2292	1839	1439	482	585							YBR077C	0.000445855	0.000433102	0.000385723	0.000350233	0.000382995	0.000369302	0.000403427	0.000386407	0.000378322	0.000414594
		YBR078W	3837	3719	3533	2967	2876	3322	3162	3330	3467	3885	3489	3532	2927	3427	3020	3048	3736	3763	4340	4711	4556	5885	4629	4811	7008	6761	5951	6447	1663	2255							YBR078W	0.00135773	0.00138974	0.00122661	0.00130055	0.00141036	0.00133206	0.00138506	0.00137766	0.00135781	0.00135924
		YBR081C	0	0	0	0	0	0	0	0	0	0	0	0	0	0	0	0	0	0	0	0	0	0	0	0	0	0	0	0	0	0							YBR081C	0	0	0	0	0	0	0	0	0	0
		YBR082C	794	794	776	660	572	688	578	624	589	666	538	501	414	486	654	585	1531	1479	2713	2918	3071	3629	3482	2788	3363	2733	2897	2703	646	793							YBR082C	0.000280959	0.000296707	0.000269416	0.000289304	0.000280503	0.000275874	0.000253182	0.000258156	0.000230675	0.000233012
		YBR083W	1275	1140	1286	964	922	1129	966	1178	1186	1247	1105	1169	1088	1069	991	911	1070	1118	858	924	798	969	616	598	369	336	221	217	722	817							YBR083W	0.000451162	0.000426002	0.00044648	0.000422559	0.00045214	0.000452706	0.000423139	0.000487353	0.000464483	0.000436286
		YBR084C-A	467	455	409	322	253	259	253	256	212	237	177	153	137	135	218	192	301	294	409	452	421	515	592	450	406	351	158	151	532	646							YBR084C-A	0.000165249	0.000170027	0.000141999	0.000141145	0.000124069	0.000103854	0.000110822	0.00010591	8.30273e-05	8.29188e-05
		YBR084W	1057	943	1049	797	723	924	834	863	1005	1035	1042	971	831	989	742	769	941	983	666	688	387	383	166	168	146	108	75	87	565	695							YBR084W	0.000374023	0.000352386	0.000364197	0.000349356	0.000354552	0.000370505	0.000365319	0.000357034	0.000393596	0.000362114
		YBR085C-A	0	0	0	0	0	0	0	0	0	0	0	0	0	0	0	0	0	0	0	0	0	0	0	0	0	0	0	0	0	0							YBR085C-A	0	0	0	0	0	0	0	0	0	0
		YBR085W	0	0	0	0	0	0	0	0	0	0	0	0	0	0	0	0	0	0	0	0	0	0	0	0	0	0	0	0	0	0							YBR085W	0	0	0	0	0	0	0	0	0	0
		YBR086C	0	0	0	0	0	0	0	0	0	0	0	0	0	0	0	0	0	0	0	0	0	0	0	0	0	0	0	0	0	0							YBR086C	0	0	0	0	0	0	0	0	0	0
		YBR090C	1036	948	1041	792	791	931	879	837	903	1070	965	964	899	931	715	766	1026	1084	775	954	797	946	640	605	484	384	221	240	535	642							YBR090C	0.000366592	0.000354254	0.00036142	0.000347165	0.000387899	0.000373312	0.00038503	0.000346277	0.000353649	0.000374359
		YBR090C-A	998	921	894	770	700	958	762	844	953	1056	937	915	870	885	773	763	915	945	830	925	766	914	629	505	361	359	225	191	577	663							YBR090C-A	0.000353145	0.000344165	0.000310384	0.000337521	0.000343273	0.000384139	0.00033378	0.000349173	0.000373231	0.000369461
		YBR092C	905	891	920	744	750	829	743	878	894	1036	948	924	828	882	703	731	811	971	802	853	787	885	638	557	395	319	198	222	521	615							YBR092C	0.000320237	0.000332954	0.000319411	0.000326124	0.000367793	0.000332412	0.000325458	0.000363239	0.000350124	0.000362464
		YBR093C	0	0	0	0	0	0	0	0	0	0	0	0	0	0	0	0	0	0	0	0	0	0	0	0	0	0	0	0	0	0							YBR093C	0	0	0	0	0	0	0	0	0	0
		YBR094W	0	0	0	0	0	0	0	0	0	0	0	0	0	0	0	0	0	0	0	0	0	0	0	0	0	0	0	0	0	0							YBR094W	0	0	0	0	0	0	0	0	0	0
		YBR095C	0	0	0	0	0	0	0	0	0	0	0	0	0	0	0	0	0	0	0	0	0	0	0	0	0	0	0	0	0	0							YBR095C	0	0	0	0	0	0	0	0	0	0
		YBR097W	0	0	0	0	0	0	0	0	0	0	0	0	0	0	0	0	0	0	0	0	0	0	0	0	0	0	0	0	0	0							YBR097W	0	0	0	0	0	0	0	0	0	0
		YBR098W	0	0	0	0	0	0	0	0	0	0	0	0	0	0	0	0	0	0	0	0	0	0	0	0	0	0	0	0	0	0							YBR098W	0	0	0	0	0	0	0	0	0	0
		YBR099C	1533	1294	1441	1134	1086	1246	1129	1189	1192	1381	1164	1261	969	1120	1051	987	1150	1222	1009	1166	983	1230	802	734	706	616	659	570	874	1026							YBR099C	0.000542457	0.000483549	0.000500294	0.000497077	0.000532564	0.000499621	0.000494538	0.000491904	0.000466833	0.000483168
		YBR100W	1716	1599	1831	1311	1133	1442	1274	1385	1391	1708	1540	1428	1221	1434	1282	1107	1445	1631	1295	1436	1231	1621	989	986	790	688	471	510	983	1195							YBR100W	0.000607212	0.000597524	0.000635696	0.000574663	0.000555612	0.000578213	0.000558053	0.000572991	0.000544769	0.000597575
		YBR101C	0	0	0	0	0	0	0	0	0	0	0	0	0	0	0	0	0	0	0	0	0	0	0	0	0	0	0	0	0	0							YBR101C	0	0	0	0	0	0	0	0	0	0
		YBR103W	1154	1169	1109	979	906	1125	920	1052	1097	1169	999	1084	913	1067	1015	923	2580	2498	7340	7210	13955	16014	39231	34224	81763	73377	84337	84394	412	487							YBR103W	0.000408346	0.000436839	0.000385029	0.000429134	0.000444294	0.000451102	0.000402989	0.000435225	0.000429627	0.000408996
		YBR104W	913	841	884	755	619	674	657	701	752	792	735	735	669	707	693	585	735	787	625	758	618	827	491	462	252	209	128	118	515	611							YBR104W	0.000323068	0.00031427	0.000306912	0.000330946	0.000303552	0.00027026	0.000287787	0.000290012	0.000294512	0.000277096
		YBR105C	0	0	0	0	0	0	0	0	0	0	0	0	0	0	0	0	0	0	0	0	0	0	0	0	0	0	0	0	0	0							YBR105C	0	0	0	0	0	0	0	0	0	0
		YBR106W	0	0	0	0	0	0	0	0	0	0	1	0	0	0	0	0	0	0	0	0	0	0	0	0	0	0	0	0	0	0							YBR106W	0	0	0	0	0	0	0	0	0	0
		YBR107C	860	814	818	632	563	726	652	720	726	872	727	829	674	799	629	600	841	868	962	1156	1109	1343	914	878	743	624	523	520	579	746							YBR107C	0.000304314	0.00030418	0.000283998	0.00027703	0.00027609	0.000291111	0.000285597	0.000297873	0.000284329	0.000305085
		YBR108W	0	0	17	3	2	3	1	3	4	3	0	2	2	2	1	0	0	3	0	1	0	0	3	0	0	0	0	0	0	0							YBR108W	0	0	5.90215e-06	1.31502e-06	9.80781e-07	1.20294e-06	4.38032e-07	1.24114e-06	1.56655e-06	1.04961e-06
		YBR111C	1730	1634	1803	1441	1203	1548	1409	1550	1638	1687	1705	1569	1501	1496	1317	1212	1362	1445	1187	1330	1327	1562	1043	1068	799	701	499	411	1023	1183							YBR111C	0.000612166	0.000610603	0.000625975	0.000631647	0.00058994	0.000620717	0.000617187	0.000641254	0.000641503	0.000590228
		YBR111W-A	0	0	0	0	0	0	0	0	0	0	0	0	0	0	0	0	0	0	0	0	0	0	0	0	0	0	0	0	0	0							YBR111W-A	0	0	0	0	0	0	0	0	0	0
		YBR112C	0	0	0	0	0	0	0	0	0	0	0	0	0	0	0	0	0	0	0	0	0	0	0	0	0	0	0	0	0	0							YBR112C	0	0	0	0	0	0	0	0	0	0
		YBR113W	924	942	963	822	697	806	798	880	863	996	948	983	825	943	809	671	906	948	794	865	626	760	490	277	316	306	224	149	478	587							YBR113W	0.00032696	0.000352012	0.000334339	0.000360315	0.000341802	0.00032319	0.000349549	0.000364067	0.000337984	0.000348469
		YBR114W	386	429	583	459	423	551	500	605	448	652	516	540	505	588	482	421	503	578	496	550	285	263	190	41	132	147	80	96	152	136							YBR114W	0.000136587	0.000160311	0.000202409	0.000201198	0.000207435	0.00022094	0.000219016	0.000250296	0.000175454	0.000228114
		YBR115C	0	0	0	0	0	0	0	0	0	0	0	0	0	0	0	0	0	1	0	0	0	0	0	0	0	0	0	0	0	0							YBR115C	0	0	0	0	0	0	0	0	0	0
		YBR116C	970	895	928	827	698	831	790	835	988	1015	946	872	846	898	760	701	954	937	723	891	789	936	616	612	373	339	184	177	546	663							YBR116C	0.000343237	0.000334449	0.000322188	0.000362507	0.000342293	0.000333214	0.000346045	0.00034545	0.000386938	0.000355116
		YBR118W	0	0	0	0	0	0	0	0	0	0	0	0	0	0	0	0	0	0	0	0	0	0	0	0	0	0	0	0	0	0							YBR118W	0	0	0	0	0	0	0	0	0	0
		YBR119W	884	854	899	743	680	797	801	857	865	909	869	762	758	813	711	621	884	867	817	865	771	927	603	633	323	313	179	200	595	717							YBR119W	0.000312806	0.000319128	0.00031212	0.000325686	0.000333466	0.000319581	0.000350864	0.000354551	0.000338767	0.00031803
		YBR120C	319	279	312	250	183	250	217	255	226	286	218	266	209	228	173	161	33	41	22	22	17	15	21	15	18	20	10	17	464	639							YBR120C	0.000112879	0.000104258	0.000108322	0.000109585	8.97415e-05	0.000100245	9.50529e-05	0.000105497	8.85102e-05	0.000100062
		YBR121C	0	0	0	0	0	0	0	0	0	0	0	0	0	0	0	0	0	0	0	0	0	0	0	0	0	0	0	0	0	0							YBR121C	0	0	0	0	0	0	0	0	0	0
		YBR122C	0	0	0	0	0	0	0	0	0	0	0	0	0	0	0	0	0	0	0	0	0	0	0	0	0	0	0	0	0	0							YBR122C	0	0	0	0	0	0	0	0	0	0
		YBR125C	1143	1108	1250	842	788	1079	943	1008	1006	1249	1117	1097	900	1082	904	799	901	925	661	844	782	990	761	648	649	485	329	314	643	780							YBR125C	0.000404454	0.000414044	0.000433982	0.000369082	0.000386428	0.000432657	0.000413064	0.000417022	0.000393988	0.000436986
		YBR126C	1170	1034	1071	777	746	946	740	843	844	851	740	715	543	500	740	639	3086	3108	10352	11016	26399	30557	90987	73429	212174	188289	262236	232782	574	647							YBR126C	0.000414008	0.000386391	0.000371835	0.00034059	0.000365831	0.000379327	0.000324144	0.000348759	0.000330543	0.000297738
		YBR127C	0	0	0	0	0	0	0	0	0	0	0	0	0	0	0	0	0	0	0	0	0	1	0	0	2	0	1	2	0	0							YBR127C	0	0	0	0	0	0	0	0	0	0
		YBR128C	943	814	905	704	706	866	794	822	933	1018	915	817	766	936	702	729	819	838	648	685	569	776	496	502	340	310	179	239	528	661							YBR128C	0.000333683	0.00030418	0.000314203	0.000308591	0.000346216	0.000347249	0.000347797	0.000340071	0.000365398	0.000356166
		YBR129C	949	966	1002	818	739	840	850	945	917	1030	965	1023	874	963	830	721	1023	1113	991	1152	921	1170	809	709	488	479	243	270	491	606							YBR129C	0.000335806	0.00036098	0.00034788	0.000358562	0.000362399	0.000336823	0.000372327	0.000390958	0.000359132	0.000360365
		YBR130C	768	789	817	684	578	694	723	748	760	966	829	914	781	808	650	633	745	778	564	700	469	584	443	244	301	247	156	163	440	484							YBR130C	0.000271759	0.000294838	0.00028365	0.000299824	0.000283446	0.00027828	0.000316697	0.000309457	0.000297645	0.000337973
		YBR131W	435	436	367	376	303	375	319	356	359	386	349	394	316	325	340	284	399	365	355	376	303	464	367	293	323	304	217	187	510	678							YBR131W	0.000153926	0.000162927	0.000127417	0.000164816	0.000148588	0.000150367	0.000139732	0.000147282	0.000140598	0.000135049
		YBR132C	0	0	0	0	0	0	0	0	0	0	0	0	0	0	0	0	0	0	0	0	0	0	0	0	0	0	0	0	0	0							YBR132C	0	0	0	0	0	0	0	0	0	0
		YBR133C	0	0	0	0	0	0	0	0	0	0	0	0	0	0	0	0	0	0	0	0	0	0	0	0	0	0	0	0	0	0							YBR133C	0	0	0	0	0	0	0	0	0	0
		YBR134W	1103	1015	1163	1004	891	1125	1066	1136	1208	1346	1292	1233	1157	1343	1027	902	1323	1430	1574	1736	1662	2159	1312	1366	914	724	529	522	432	583							YBR134W	0.0003903	0.000379291	0.000403777	0.000440093	0.000436938	0.000451102	0.000466942	0.000469977	0.000473099	0.000470923
		YBR137W	972	925	1043	779	757	897	848	902	961	1084	1043	1006	809	940	744	700	928	955	853	945	832	984	608	590	374	359	241	200	526	654							YBR137W	0.000343945	0.000345659	0.000362114	0.000341466	0.000371226	0.000359679	0.000371451	0.000373168	0.000376364	0.000379257
		YBR138C	1032	989	1112	923	769	901	904	931	1020	1106	925	1016	856	972	889	765	930	924	832	989	822	979	508	514	318	327	177	180	618	746							YBR138C	0.000365176	0.000369575	0.00038607	0.000404587	0.00037711	0.000361283	0.000395981	0.000385166	0.000399471	0.000386955
		YBR139W	938	920	915	758	679	842	749	845	865	1028	941	811	724	759	695	662	887	859	854	869	704	893	596	543	338	344	198	196	493	672							YBR139W	0.000331914	0.000343791	0.000317675	0.000332261	0.000332975	0.000337625	0.000328086	0.000349587	0.000338767	0.000359665
		YBR141C	1250	1217	1244	1016	979	1090	1103	1135	1183	1306	1172	1193	1113	1090	1068	906	1165	1173	980	1132	952	1157	758	651	568	441	315	320	640	785							YBR141C	0.000442316	0.000454776	0.000431899	0.000445353	0.000480092	0.000437068	0.000483149	0.000469563	0.000463308	0.000456928
		YBR144C	0	0	5	1	1	7	3	1	4	5	0	2	0	2	0	0	0	0	0	1	0	1	0	0	0	0	1	0	0	0							YBR144C	0	0	1.73593e-06	4.38339e-07	4.90391e-07	2.80686e-06	1.3141e-06	4.13712e-07	1.56655e-06	1.74934e-06
		YBR145W	899	908	1001	765	636	842	783	810	896	1047	912	834	719	800	774	655	862	898	828	892	780	940	583	544	392	324	186	206	541	634							YBR145W	0.000318114	0.000339307	0.000347533	0.00033533	0.000311888	0.000337625	0.000342979	0.000335107	0.000350908	0.000366312
		YBR146W	1589	1612	1547	1005	975	1338	1252	1072	1190	1306	1462	1239	1092	1154	1013	991	796	943	736	837	924	1063	813	754	614	418	249	318	1370	1776							YBR146W	0.000562272	0.000602381	0.000537096	0.000440531	0.000478131	0.000536511	0.000548416	0.0004435	0.000466049	0.000456928
		YBR147W	1638	1589	1754	1316	1207	1608	1359	1501	1547	1769	1627	1571	1324	1524	1495	1287	1451	1452	1121	1218	1038	1287	788	764	624	488	356	312	1047	1285							YBR147W	0.000579611	0.000593787	0.000608963	0.000576854	0.000591901	0.000644776	0.000595285	0.000620982	0.000605864	0.000618917
		YBR148W	934	859	965	795	685	790	753	810	796	920	873	901	760	813	750	632	782	796	591	680	616	708	487	468	339	305	154	170	532	631							YBR148W	0.000330499	0.000320996	0.000335034	0.00034848	0.000335918	0.000316774	0.000329838	0.000335107	0.000311744	0.000321879
		YBR149W	0	0	0	0	0	0	0	0	0	0	0	0	0	0	0	0	0	0	0	0	0	0	0	0	0	0	0	0	0	0							YBR149W	0	0	0	0	0	0	0	0	0	0
		YBR150C	2	2	7	3	5	5	1	6	2	5	2	5	2	3	2	0	1	2	3	0	1	0	0	0	2	1	1	0	0	0							YBR150C	7.07706e-07	7.47372e-07	2.4303e-06	1.31502e-06	2.45195e-06	2.0049e-06	4.38032e-07	2.48227e-06	7.83276e-07	1.74934e-06
		YBR151W	979	889	926	738	692	840	775	844	879	966	926	856	745	789	722	698	914	1005	836	903	844	1088	685	683	428	346	245	224	557	684							YBR151W	0.000346422	0.000332207	0.000321494	0.000323494	0.00033935	0.000336823	0.000339475	0.000349173	0.00034425	0.000337973
		YBR156C	0	1	1	1	1	1	0	2	2	1	0	0	0	1	1	0	1	0	1	0	2	1	0	0	1	1	1	0	0	0							YBR156C	0	3.73686e-07	3.47185e-07	4.38339e-07	4.90391e-07	4.0098e-07	0	8.27424e-07	7.83276e-07	3.49868e-07
		YBR157C	1	0	0	0	0	0	0	0	0	0	0	0	0	0	0	0	0	0	0	0	0	0	0	0	1	0	0	0	0	0							YBR157C	3.53853e-07	0	0	0	0	0	0	0	0	0
		YBR158W	1073	1053	1155	905	818	951	991	940	1031	1153	1072	968	1013	1056	805	785	1097	1149	1080	1224	1063	1427	969	815	677	527	351	439	623	811							YBR158W	0.000379684	0.000393491	0.000400999	0.000396697	0.000401139	0.000381332	0.00043409	0.00038889	0.000403779	0.000403398
		YBR159W	0	0	0	1	0	0	0	0	0	0	0	0	0	0	0	0	0	0	0	0	0	0	1	0	0	0	0	0	0	0							YBR159W	0	0	0	4.38339e-07	0	0	0	0	0	0
		YBR161W	896	828	821	638	586	698	661	683	728	836	753	757	581	690	569	650	828	719	641	708	595	796	493	513	320	275	159	216	468	612							YBR161W	0.000317052	0.000309412	0.000285039	0.00027966	0.000287369	0.000279884	0.000289539	0.000282565	0.000285113	0.00029249
		YBR162C	15	11	37	20	16	23	24	25	19	34	20	26	17	16	8	9	13	16	10	9	3	4	2	3	4	1	1	2	5	5							YBR162C	5.30779e-06	4.11054e-06	1.28459e-05	8.76679e-06	7.84625e-06	9.22254e-06	1.05128e-05	1.03428e-05	7.44112e-06	1.18955e-05
		YBR162W-A	887	817	838	751	640	719	721	746	824	916	901	773	659	778	682	624	824	799	633	699	608	794	485	503	270	258	193	122	547	599							YBR162W-A	0.000313868	0.000305301	0.000290941	0.000329193	0.00031385	0.000288305	0.000315821	0.000308629	0.00032271	0.00032048
		YBR163W	320	322	263	230	166	255	212	203	179	192	152	166	114	149	179	179	39	40	26	11	13	12	16	13	8	11	12	11	404	537							YBR163W	0.000113233	0.000120327	9.13097e-05	0.000100818	8.14048e-05	0.00010225	9.28628e-05	8.39836e-05	7.01032e-05	6.71747e-05
		YBR164C	609	550	635	500	441	547	457	478	542	572	505	549	440	449	409	389	310	344	293	328	269	348	267	170	161	202	129	144	509	611							YBR164C	0.000215496	0.000205527	0.000220463	0.00021917	0.000216262	0.000219336	0.000200181	0.000197754	0.000212268	0.000200125
		YBR165W	988	946	977	786	694	815	820	833	857	983	839	862	707	783	745	681	879	895	753	864	687	940	728	698	593	446	338	311	520	604							YBR165W	0.000349607	0.000353507	0.0003392	0.000344535	0.000340331	0.000326799	0.000359186	0.000344622	0.000335634	0.000343921
		YBR166C	13	7	6	11	3	7	7	6	11	10	12	6	7	4	3	6	1	7	4	5	3	5	3	4	2	5	1	1	5	3							YBR166C	4.60009e-06	2.6158e-06	2.08311e-06	4.82173e-06	1.47117e-06	2.80686e-06	3.06622e-06	2.48227e-06	4.30802e-06	3.49868e-06
		YBR168W	388	372	340	250	170	204	140	173	155	190	124	142	85	123	165	192	170	184	239	210	316	377	445	413	419	292	143	101	642	715							YBR168W	0.000137295	0.000139011	0.000118043	0.000109585	8.33664e-05	8.17999e-05	6.13245e-05	7.15722e-05	6.07039e-05	6.6475e-05
		YBR169C	895	906	1005	799	674	857	790	861	867	994	920	891	781	873	725	763	854	923	734	770	713	848	520	504	365	328	207	195	557	763							YBR169C	0.000316698	0.000338559	0.000348921	0.000350233	0.000330523	0.00034364	0.000346045	0.000356206	0.00033955	0.000347769
		YBR170C	0	0	0	0	0	0	0	0	0	0	0	0	0	0	0	0	0	0	0	0	0	0	0	0	0	0	0	0	0	0							YBR170C	0	0	0	0	0	0	0	0	0	0
		YBR171W	560	512	405	399	316	381	343	360	361	449	381	364	257	323	362	390	258	335	337	331	482	597	1079	1016	2043	2024	2113	1956	496	560							YBR171W	0.000198158	0.000191327	0.00014061	0.000174897	0.000154963	0.000152773	0.000150245	0.000148936	0.000141381	0.000157091
		YBR172C	631	799	870	692	598	703	665	724	652	854	697	779	657	721	661	649	751	827	960	945	600	598	376	94	238	219	131	149	333	323							YBR172C	0.000223281	0.000298575	0.000302051	0.000303331	0.000293254	0.000281889	0.000291291	0.000299528	0.000255348	0.000298788
		YBR173C	511	548	503	412	320	366	302	366	272	272	212	174	181	206	283	305	520	578	1055	938	937	932	588	533	365	195	98	88	560	668							YBR173C	0.000180819	0.00020478	0.000174634	0.000180596	0.000156925	0.000146759	0.000132286	0.000151419	0.000106526	9.51642e-05
		YBR174C	356	321	339	281	245	313	242	275	298	301	312	287	208	281	218	230	114	103	90	86	102	117	130	97	119	97	78	76	480	646							YBR174C	0.000125972	0.000119953	0.000117696	0.000123173	0.000120146	0.000125507	0.000106004	0.000113771	0.000116708	0.00010531
		YBR175W	315	292	264	257	199	238	224	239	224	287	225	209	176	180	225	206	79	121	62	69	89	113	89	99	97	115	71	48	422	540							YBR175W	0.000111464	0.000109116	9.16569e-05	0.000112653	9.75877e-05	9.54332e-05	9.81191e-05	9.88772e-05	8.77269e-05	0.000100412
		YBR176W	743	685	729	607	493	607	529	600	735	758	686	669	586	676	550	533	681	688	631	637	531	702	415	396	306	236	135	168	486	540							YBR176W	0.000262913	0.000255975	0.000253098	0.000266072	0.000241763	0.000243395	0.000231719	0.000248227	0.000287854	0.0002652
		YBR177C	732	730	757	577	619	687	617	667	664	821	750	781	694	751	634	586	730	724	652	735	650	774	531	455	338	326	143	183	520	607							YBR177C	0.00025902	0.000272791	0.000262819	0.000252922	0.000303552	0.000275473	0.000270266	0.000275946	0.000260048	0.000287242
		YBR178W	840	905	891	716	673	856	689	691	835	899	825	818	788	806	755	794	842	817	876	813	581	782	392	325	331	267	177	193	675	775							YBR178W	0.000297236	0.000338186	0.000309342	0.000313851	0.000330033	0.000343239	0.000301804	0.000285875	0.000327018	0.000314532
		YBR179C	338	344	306	244	196	268	182	200	185	234	168	152	125	143	192	202	30	40	13	20	9	17	24	8	16	7	6	12	453	627							YBR179C	0.000119602	0.000128548	0.000106239	0.000106955	9.61165e-05	0.000107463	7.97218e-05	8.27424e-05	7.2453e-05	8.18692e-05
		YBR180W	906	791	813	766	624	827	751	732	869	981	824	920	776	785	640	758	819	888	743	900	703	871	498	477	341	281	210	225	548	687							YBR180W	0.000320591	0.000295585	0.000282262	0.000335768	0.000306004	0.00033161	0.000328962	0.000302837	0.000340333	0.000343221
		YBR181C	0	0	0	0	0	0	0	0	0	0	0	0	0	0	0	0	0	0	0	0	0	0	0	0	0	0	0	0	0	0							YBR181C	0	0	0	0	0	0	0	0	0	0
		YBR182C	811	886	848	750	637	830	792	766	886	918	836	908	758	874	760	728	897	879	736	906	814	953	665	583	513	456	321	365	598	711							YBR182C	0.000286975	0.000331086	0.000294413	0.000328754	0.000312379	0.000332813	0.000346921	0.000316904	0.000346991	0.000321179
		YBR182C-A	0	0	0	0	0	0	0	0	0	0	0	0	0	0	0	0	0	0	0	0	0	0	0	0	0	0	0	0	0	0							YBR182C-A	0	0	0	0	0	0	0	0	0	0
		YBR183W	718	707	722	584	590	660	662	670	725	816	737	735	658	654	638	552	687	727	638	717	600	740	446	429	266	258	128	181	465	540							YBR183W	0.000254066	0.000264196	0.000250668	0.00025599	0.00028933	0.000264647	0.000289977	0.000277187	0.000283938	0.000285493
		YBR184W	796	723	843	662	565	733	664	782	806	862	763	865	728	766	699	611	794	874	713	839	616	842	491	389	300	251	153	179	581	638							YBR184W	0.000281667	0.000270175	0.000292677	0.000290181	0.000277071	0.000293918	0.000290853	0.000323523	0.00031566	0.000301587
		YBR185C	806	838	789	685	586	794	690	720	745	855	803	701	700	714	584	590	568	626	384	407	249	299	150	131	138	112	66	91	552	621							YBR185C	0.000285205	0.000313149	0.000273929	0.000300262	0.000287369	0.000318378	0.000302242	0.000297873	0.00029177	0.000299138
		YBR186W	812	818	788	680	589	661	674	766	780	869	802	778	727	786	662	631	820	841	887	976	862	1083	632	617	431	318	225	234	547	606							YBR186W	0.000287329	0.000305675	0.000273582	0.000298071	0.00028884	0.000265048	0.000295233	0.000316904	0.000305478	0.000304036
		YBR187W	446	636	659	507	465	600	556	531	551	618	586	635	546	595	523	503	477	470	382	363	197	184	95	29	65	80	60	41	397	382							YBR187W	0.000157818	0.000237664	0.000228795	0.000222238	0.000228032	0.000240588	0.000243546	0.000219681	0.000215793	0.000216219
		YBR188C	0	3	1	2	4	0	1	0	0	2	1	1	2	0	1	2	3	1	3	0	2	1	0	5	0	1	0	0	0	0							YBR188C	0	1.12106e-06	3.47185e-07	8.76679e-07	1.96156e-06	0	4.38032e-07	0	0	6.99737e-07
		YBR189W	371	350	284	208	150	196	134	134	104	112	91	98	64	74	156	159	220	182	288	307	329	340	161	132	43	47	26	15	608	695							YBR189W	0.000131279	0.00013079	9.86006e-05	9.11746e-05	7.35586e-05	7.8592e-05	5.86963e-05	5.54374e-05	4.07304e-05	3.91853e-05
		YBR191W	0	0	0	0	0	0	0	0	0	0	0	0	0	0	0	0	0	0	0	0	0	0	0	0	0	0	0	0	0	0							YBR191W	0	0	0	0	0	0	0	0	0	0
		YBR194W	0	0	0	0	0	0	0	0	0	0	0	0	0	0	0	0	0	0	0	0	0	0	0	0	0	0	0	0	0	0							YBR194W	0	0	0	0	0	0	0	0	0	0
		YBR195C	0	0	1	0	3	3	0	0	1	2	1	0	0	1	0	0	0	0	0	0	0	0	0	0	0	0	0	0	1	1							YBR195C	0	0	3.47185e-07	0	1.47117e-06	1.20294e-06	0	0	3.91638e-07	6.99737e-07
		YBR196C-A	0	0	0	0	0	0	0	0	0	0	1	0	0	0	0	0	0	0	0	0	0	0	0	0	0	0	0	0	0	0							YBR196C-A	0	0	0	0	0	0	0	0	0	0
		YBR196C-B	0	0	0	0	0	0	0	0	0	0	0	0	0	0	0	0	0	0	0	0	0	0	0	0	0	0	0	0	0	0							YBR196C-B	0	0	0	0	0	0	0	0	0	0
		YBR197C	963	841	942	693	688	803	747	723	841	941	903	910	751	869	717	638	929	991	995	1077	959	1105	766	606	438	452	236	261	533	583							YBR197C	0.00034076	0.00031427	0.000327049	0.000303769	0.000337389	0.000321987	0.00032721	0.000299114	0.000329368	0.000329226
		YBR199W	907	871	933	759	706	853	753	837	927	928	880	893	760	899	747	712	936	900	802	862	769	932	600	599	421	355	226	204	524	631							YBR199W	0.000320945	0.00032548	0.000323924	0.000332699	0.000346216	0.000342036	0.000329838	0.000346277	0.000363048	0.000324678
		YBR200W	136	116	80	68	45	64	46	52	15	30	13	21	2	6	57	37	11	12	11	5	13	5	6	4	0	1	0	0	400	457							YBR200W	4.8124e-05	4.33476e-05	2.77748e-05	2.98071e-05	2.20676e-05	2.56627e-05	2.01495e-05	2.1513e-05	5.87457e-06	1.04961e-05
		YBR200W-A	0	0	0	0	0	0	0	0	0	0	0	0	0	0	0	0	0	0	0	0	0	0	0	0	0	0	0	0	0	0							YBR200W-A	0	0	0	0	0	0	0	0	0	0
		YBR201W	0	0	0	0	0	0	0	0	0	0	0	0	0	0	0	0	0	0	0	0	0	0	0	0	0	0	0	0	0	0							YBR201W	0	0	0	0	0	0	0	0	0	0
		YBR203W	0	0	0	0	0	0	0	0	0	0	0	0	0	0	0	0	0	0	0	0	0	0	0	0	0	0	0	0	0	0							YBR203W	0	0	0	0	0	0	0	0	0	0
		YBR204C	806	697	738	658	589	648	664	639	663	795	761	652	677	695	619	560	715	763	695	725	553	674	421	389	279	217	145	132	477	637							YBR204C	0.000285205	0.000260459	0.000256223	0.000288427	0.00028884	0.000259835	0.000290853	0.000264362	0.000259656	0.000278145
		YBR205W	855	809	893	703	634	721	665	746	717	891	834	878	744	793	734	620	777	923	770	741	651	772	507	457	303	308	196	205	511	651							YBR205W	0.000302544	0.000302312	0.000310037	0.000308152	0.000310908	0.000289106	0.000291291	0.000308629	0.000280804	0.000311733
		YBR206W	829	767	852	706	571	676	694	793	782	957	812	838	733	783	654	625	810	768	700	820	756	865	578	572	385	371	274	219	525	571							YBR206W	0.000293344	0.000286617	0.000295802	0.000309468	0.000280013	0.000271062	0.000303994	0.000328074	0.000306261	0.000334824
		YBR207W	919	859	922	754	671	838	736	842	879	990	909	925	827	893	709	707	928	931	779	842	876	1059	829	708	564	474	268	316	486	618							YBR207W	0.000325191	0.000320996	0.000320105	0.000330508	0.000329052	0.000336021	0.000322391	0.000348346	0.00034425	0.00034637
		YBR208C	776	732	826	672	524	747	647	709	727	844	802	718	621	738	621	531	737	819	634	780	644	804	543	488	305	317	168	221	456	647							YBR208C	0.00027459	0.000273538	0.000286775	0.000294564	0.000256965	0.000299532	0.000283407	0.000293322	0.000284721	0.000295289
		YBR209W	952	1016	1041	862	707	911	763	855	945	932	942	916	929	1033	918	894	994	902	883	883	735	915	563	557	381	321	202	189	750	919							YBR209W	0.000336868	0.000379665	0.00036142	0.000377848	0.000346706	0.000365293	0.000334218	0.000353724	0.000370098	0.000326077
		YBR210W	727	677	701	584	531	601	539	595	646	713	632	647	569	630	569	483	689	655	526	664	491	625	371	276	225	185	109	106	417	505							YBR210W	0.000257251	0.000252985	0.000243377	0.00025599	0.000260397	0.000240989	0.000236099	0.000246159	0.000252998	0.000249456
		YBR212W	667	624	634	552	457	645	562	579	632	618	708	639	555	615	531	508	528	657	655	733	537	652	373	426	274	241	134	142	420	498							YBR212W	0.00023602	0.00023318	0.000220116	0.000241963	0.000224108	0.000258632	0.000246174	0.000239539	0.000247515	0.000216219
		YBR213W	7	4	4	3	6	6	4	2	1	6	3	7	6	7	7	4	8	8	6	1	3	4	1	1	5	2	2	2	2	4							YBR213W	2.47697e-06	1.49474e-06	1.38874e-06	1.31502e-06	2.94234e-06	2.40588e-06	1.75213e-06	8.27424e-07	3.91638e-07	2.09921e-06
		YBR214W	715	711	721	559	497	623	541	561	703	778	685	663	559	629	541	565	626	667	472	565	382	508	282	263	173	169	100	110	494	611							YBR214W	0.000253005	0.000265691	0.000250321	0.000245032	0.000243724	0.00024981	0.000236975	0.000232093	0.000275322	0.000272198
		YBR215W	67	102	108	86	69	97	102	109	72	115	92	103	75	101	77	82	48	60	46	74	33	25	24	3	16	20	17	13	38	30							YBR215W	2.37081e-05	3.8116e-05	3.7496e-05	3.76972e-05	3.38369e-05	3.8895e-05	4.46792e-05	4.50946e-05	2.81979e-05	4.02349e-05
		YBR216C	0	1	1	0	0	1	2	1	0	0	2	1	3	4	2	1	1	0	0	0	1	0	0	0	0	0	0	0	0	1							YBR216C	0	3.73686e-07	3.47185e-07	0	0	4.0098e-07	8.76064e-07	4.13712e-07	0	0
		YBR217W	762	799	807	655	580	682	614	659	800	793	763	750	665	745	669	585	711	796	699	778	792	1006	732	727	489	463	308	380	456	592							YBR217W	0.000269636	0.000298575	0.000280179	0.000287112	0.000284427	0.000273468	0.000268952	0.000272636	0.00031331	0.000277446
		YBR218C	0	0	0	0	0	0	0	0	0	0	0	0	0	0	0	0	0	0	0	0	0	0	0	0	0	0	0	0	0	0							YBR218C	0	0	0	0	0	0	0	0	0	0
		YBR219C	910	893	907	681	652	777	712	795	857	891	912	830	743	947	831	816	859	779	688	773	666	760	466	424	381	340	192	209	661	896							YBR219C	0.000322006	0.000333701	0.000314897	0.000298509	0.000319735	0.000311561	0.000311879	0.000328901	0.000335634	0.000311733
		YBR220C	716	741	736	633	537	620	628	671	701	733	704	646	562	629	571	610	708	696	511	586	474	561	319	233	218	205	97	173	438	497							YBR220C	0.000253359	0.000276901	0.000255528	0.000277469	0.00026334	0.000248607	0.000275084	0.000277601	0.000274538	0.000256454
		YBR221C	0	0	1	0	0	0	1	0	0	1	0	0	0	0	0	0	0	0	0	0	0	0	0	0	0	0	0	0	0	0							YBR221C	0	0	3.47185e-07	0	0	0	4.38032e-07	0	0	3.49868e-07
		YBR221W-A	0	0	0	0	0	0	0	0	0	0	0	0	0	0	0	0	0	0	0	0	0	0	0	0	0	0	0	0	0	0							YBR221W-A	0	0	0	0	0	0	0	0	0	0
		YBR222C	0	0	0	0	0	0	0	0	0	0	0	0	0	0	0	0	0	0	0	0	0	0	0	0	0	0	0	0	0	0							YBR222C	0	0	0	0	0	0	0	0	0	0
		YBR223C	892	767	965	703	651	741	732	792	857	893	895	853	713	895	687	728	815	790	671	704	447	568	253	250	163	184	111	88	560	680							YBR223C	0.000315637	0.000286617	0.000335034	0.000308152	0.000319244	0.000297126	0.000320639	0.00032766	0.000335634	0.000312433
		YBR224W	639	645	718	557	457	618	509	539	651	622	663	647	482	537	511	475	684	661	590	621	611	817	878	875	911	795	678	734	556	633							YBR224W	0.000226112	0.000241027	0.000249279	0.000244155	0.000224108	0.000247806	0.000222958	0.000222991	0.000254956	0.000217618
		YBR225W	0	0	0	2	0	0	1	0	0	1	0	0	1	1	1	2	1	1	7	4	10	1	21	11	103	35	52	58	6	4							YBR225W	0	0	0	8.76679e-07	0	0	4.38032e-07	0	0	3.49868e-07
		YBR226C	729	667	760	578	505	685	620	574	624	742	709	620	615	683	570	495	623	703	491	579	548	733	992	939	1274	1026	1024	1066	604	636							YBR226C	0.000257959	0.000249248	0.000263861	0.00025336	0.000247647	0.000274671	0.00027158	0.000237471	0.000244382	0.000259602
		YBR227C	713	633	625	615	496	617	527	603	583	693	594	688	562	662	528	510	541	531	388	434	230	289	131	166	115	110	74	88	590	712							YBR227C	0.000252297	0.000236543	0.000216991	0.000269579	0.000243234	0.000247405	0.000230843	0.000249468	0.000228325	0.000242459
		YBR228W	781	751	786	654	547	705	655	672	671	796	797	754	649	697	578	551	747	752	654	713	551	749	434	361	242	249	155	141	565	687							YBR228W	0.000276359	0.000280638	0.000272888	0.000286674	0.000268244	0.000282691	0.000286911	0.000278015	0.000262789	0.000278495
		YBR229C	792	665	749	621	544	669	546	614	647	752	752	636	565	636	570	584	686	681	508	590	536	703	571	604	500	394	360	300	494	638							YBR229C	0.000280252	0.000248501	0.000260042	0.000272209	0.000266772	0.000268256	0.000239165	0.000254019	0.00025339	0.000263101
		YBR230C	859	873	937	643	612	756	713	708	826	958	842	829	747	812	681	645	868	885	832	851	740	865	480	530	386	312	185	167	657	714							YBR230C	0.00030396	0.000326228	0.000325313	0.000281852	0.000300119	0.000303141	0.000312317	0.000292908	0.000323493	0.000335174
		YBR230W-A	0	0	0	0	0	0	0	0	0	0	0	0	0	0	0	0	0	0	0	0	0	0	0	0	0	0	0	0	0	0							YBR230W-A	0	0	0	0	0	0	0	0	0	0
		YBR231C	616	575	574	419	417	529	417	497	510	513	468	470	373	464	440	393	732	803	1454	1382	1216	1365	579	638	378	339	274	228	641	764							YBR231C	0.000217973	0.000214869	0.000199284	0.000183664	0.000204493	0.000212118	0.000182659	0.000205615	0.000199735	0.000179483
		YBR232C	906	744	843	717	590	766	766	754	724	869	784	764	733	764	670	607	865	867	756	924	792	930	695	661	498	420	328	291	455	530							YBR232C	0.000320591	0.000278022	0.000292677	0.000314289	0.00028933	0.000307151	0.000335532	0.000311939	0.000283546	0.000304036
		YBR233W	0	0	0	0	0	0	0	0	0	0	0	0	0	1	0	0	0	0	0	0	0	0	0	0	0	0	0	0	0	1							YBR233W	0	0	0	0	0	0	0	0	0	0
		YBR235W	795	695	654	611	515	693	544	616	626	749	642	698	575	678	561	517	762	715	565	632	507	654	410	432	288	269	147	144	496	635							YBR235W	0.000281313	0.000259712	0.000227059	0.000267825	0.000252551	0.000277879	0.000238289	0.000254847	0.000245165	0.000262051
		YBR238C	566	519	546	464	406	524	394	473	437	530	508	396	386	418	419	395	620	603	617	624	611	774	746	622	613	531	366	383	444	547							YBR238C	0.000200281	0.000193943	0.000189563	0.000203389	0.000199099	0.000210113	0.000172585	0.000195686	0.000171146	0.00018543
		YBR239C	768	599	656	527	432	538	491	540	560	638	532	559	489	524	475	443	611	567	464	481	394	545	291	322	145	129	76	97	382	511							YBR239C	0.000271759	0.000223838	0.000227754	0.000231005	0.000211849	0.000215727	0.000215074	0.000223405	0.000219317	0.000223216
		YBR240C	704	610	650	565	477	636	592	602	581	722	708	665	525	649	534	466	626	698	564	565	465	608	379	344	239	187	125	131	504	619							YBR240C	0.000249112	0.000227948	0.00022567	0.000247662	0.000233916	0.000255023	0.000259315	0.000249055	0.000227542	0.000252605
		YBR241C	789	741	741	581	563	654	645	644	667	730	680	649	602	671	559	512	660	696	611	625	496	724	492	438	256	248	201	157	542	728							YBR241C	0.00027919	0.000276901	0.000257264	0.000254675	0.00027609	0.000262241	0.000282531	0.000266431	0.000261223	0.000255404
		YBR242W	739	677	750	584	600	650	643	635	681	732	708	675	612	645	536	542	686	619	610	653	618	794	482	540	434	400	306	298	513	735							YBR242W	0.000261497	0.000252985	0.000260389	0.00025599	0.000294234	0.000260637	0.000281654	0.000262707	0.000266706	0.000256104
		YBR244W	719	697	757	547	565	690	613	595	624	772	658	683	596	703	586	522	662	731	595	673	563	768	422	415	313	222	166	200	489	608							YBR244W	0.00025442	0.000260459	0.000262819	0.000239772	0.000277071	0.000276676	0.000268514	0.000246159	0.000244382	0.000270098
		YBR245C	494	523	494	456	371	440	397	449	476	505	523	472	427	368	407	393	414	426	506	525	638	727	795	730	818	787	453	572	560	715							YBR245C	0.000174803	0.000195438	0.00017151	0.000199883	0.000181935	0.000176431	0.000173899	0.000185757	0.00018642	0.000176684
		YBR246W	677	637	663	540	465	541	482	494	535	577	491	515	406	524	500	416	584	632	770	786	1085	1462	1526	1459	1468	1318	800	904	568	682							YBR246W	0.000239558	0.000238038	0.000230184	0.000236703	0.000228032	0.00021693	0.000211131	0.000204374	0.000209526	0.000201874
		YBR248C	0	0	0	0	0	0	0	0	0	0	0	0	0	0	0	0	0	0	0	0	0	0	0	0	0	0	0	0	0	0							YBR248C	0	0	0	0	0	0	0	0	0	0
		YBR249C	0	0	0	0	0	0	0	0	0	0	0	0	0	0	0	0	0	0	0	0	0	0	0	0	0	0	0	0	0	0							YBR249C	0	0	0	0	0	0	0	0	0	0
		YBR250W	820	770	870	679	662	733	694	771	751	843	849	787	755	828	648	681	869	875	722	807	725	906	609	611	425	380	260	239	581	768							YBR250W	0.000290159	0.000287738	0.000302051	0.000297632	0.000324639	0.000293918	0.000303994	0.000318972	0.00029412	0.000294939
		YBR251W	26	28	29	19	14	13	3	14	6	10	5	11	3	6	10	6	2	3	3	2	1	1	0	0	0	0	0	0	137	159							YBR251W	9.20018e-06	1.04632e-05	1.00684e-05	8.32845e-06	6.86547e-06	5.21274e-06	1.3141e-06	5.79197e-06	2.34983e-06	3.49868e-06
		YBR255W	1210	1038	1241	972	779	989	977	941	1041	1058	1114	1027	920	1069	959	804	1343	1306	1298	1525	1502	1752	1315	1166	979	909	609	683	585	687							YBR255W	0.000428162	0.000387886	0.000430857	0.000426066	0.000382014	0.000396569	0.000427957	0.000389303	0.000407695	0.000370161
		YBR258C	839	787	882	670	632	715	659	673	727	814	737	788	675	749	676	584	733	840	655	680	494	649	389	354	231	240	120	186	620	728							YBR258C	0.000296883	0.000294091	0.000306217	0.000293687	0.000309927	0.000286701	0.000288663	0.000278428	0.000284721	0.000284793
		YBR259W	817	846	884	686	653	772	631	805	783	933	860	783	682	825	693	672	894	883	772	784	658	798	535	462	351	316	173	177	639	723							YBR259W	0.000289098	0.000316138	0.000306912	0.000300701	0.000320225	0.000309556	0.000276398	0.000333038	0.000306653	0.000326427
		YBR260C	0	0	0	0	0	0	0	0	0	0	0	0	0	0	0	0	0	0	0	0	0	0	0	0	0	0	0	0	0	0							YBR260C	0	0	0	0	0	0	0	0	0	0
		YBR261C	672	663	751	547	470	625	523	529	623	604	666	558	532	543	539	512	711	757	777	827	727	898	654	637	617	529	359	369	535	697							YBR261C	0.000237789	0.000247754	0.000260736	0.000239772	0.000230484	0.000250612	0.000229091	0.000218854	0.000243991	0.000211321
		YBR262C	833	730	824	683	510	723	617	692	750	875	821	820	649	790	638	660	858	771	784	838	774	902	706	655	470	381	245	227	625	713							YBR262C	0.000294759	0.000272791	0.000286081	0.000299386	0.000250099	0.000289908	0.000270266	0.000286289	0.000293729	0.000306135
		YBR263W	673	650	730	601	540	677	587	650	689	710	666	660	625	636	556	572	677	717	593	660	572	762	472	445	294	301	193	234	497	611							YBR263W	0.000238143	0.000242896	0.000253445	0.000263442	0.000264811	0.000271463	0.000257125	0.000268913	0.000269839	0.000248407
		YBR264C	887	1003	1044	764	703	973	887	862	914	955	878	918	887	970	889	905	1004	985	904	966	804	944	630	654	493	453	261	265	725	994							YBR264C	0.000313868	0.000374807	0.000362461	0.000334891	0.000344745	0.000390153	0.000388534	0.00035662	0.000357957	0.000334124
		YBR266C	65	74	43	31	21	35	20	9	15	22	16	15	9	8	24	22	32	31	44	45	52	45	50	34	61	43	42	45	285	266							YBR266C	2.30004e-05	2.76527e-05	1.4929e-05	1.35885e-05	1.02982e-05	1.40343e-05	8.76064e-06	3.72341e-06	5.87457e-06	7.69711e-06
		YBR267W	61	46	36	34	12	30	13	22	13	14	7	15	8	2	12	11	18	17	23	20	6	15	6	7	0	1	1	0	217	347							YBR267W	2.1585e-05	1.71895e-05	1.24987e-05	1.49035e-05	5.88469e-06	1.20294e-05	5.69441e-06	9.10167e-06	5.09129e-06	4.89816e-06
		YBR268W	0	0	0	0	0	0	0	0	0	0	0	0	0	0	0	0	0	0	0	0	0	0	0	0	0	0	0	0	0	0							YBR268W	0	0	0	0	0	0	0	0	0	0
		YBR269C	0	0	0	0	0	0	0	0	0	0	0	0	0	0	0	0	0	0	0	0	0	0	0	0	0	0	0	0	0	0							YBR269C	0	0	0	0	0	0	0	0	0	0
		YBR270C	1027	894	1024	772	745	848	847	909	847	1032	985	905	826	834	741	727	847	893	836	801	726	863	606	504	336	286	192	216	670	734							YBR270C	0.000363407	0.000334075	0.000355518	0.000338398	0.000365341	0.000340031	0.000371013	0.000376064	0.000331717	0.000361064
		YBR271W	817	754	929	663	628	784	743	725	810	862	873	831	712	859	662	698	833	917	752	881	667	879	494	291	285	285	166	181	524	629							YBR271W	0.000289098	0.000281759	0.000322535	0.000290619	0.000307965	0.000314368	0.000325458	0.000299941	0.000317227	0.000301587
		YBR272C	0	0	0	0	1	0	0	0	0	0	0	0	0	0	0	0	0	0	0	0	0	0	0	0	0	0	0	0	0	0							YBR272C	0	0	0	0	4.90391e-07	0	0	0	0	0
		YBR273C	1151	1091	1226	972	873	996	1027	1110	1165	1341	1066	1233	1045	1188	995	988	1478	1371	1901	2167	2670	3162	3668	2729	3315	3157	1468	1786	587	740							YBR273C	0.000407285	0.000407691	0.000425649	0.000426066	0.000428111	0.000399376	0.000449859	0.000459221	0.000456258	0.000469174
		YBR274W	0	0	0	0	0	0	0	0	0	0	0	0	0	0	0	0	0	0	0	0	0	0	0	0	0	0	0	0	0	0							YBR274W	0	0	0	0	0	0	0	0	0	0
		YBR275C	962	908	938	730	738	769	717	778	864	922	853	843	785	842	767	620	906	1093	1123	1149	963	1095	733	583	464	423	271	221	637	663							YBR275C	0.000340406	0.000339307	0.00032566	0.000319988	0.000361908	0.000308353	0.000314069	0.000321868	0.000338375	0.000322579
		YBR276C	895	809	930	677	590	832	692	746	800	875	944	869	715	841	649	575	768	781	673	786	802	1143	1074	1036	998	1015	741	682	357	495							YBR276C	0.000316698	0.000302312	0.000322882	0.000296756	0.00028933	0.000333615	0.000303118	0.000308629	0.00031331	0.000306135
		YBR277C	776	737	712	598	494	621	581	577	580	705	663	600	518	524	568	529	538	582	397	391	388	459	426	396	359	284	229	242	516	587							YBR277C	0.00027459	0.000275406	0.000247196	0.000262127	0.000242253	0.000249008	0.000254497	0.000238712	0.00022715	0.000246657
		YBR278W	0	0	0	0	0	0	0	0	0	0	0	0	0	0	0	0	0	0	0	0	0	0	0	0	0	0	0	0	0	0							YBR278W	0	0	0	0	0	0	0	0	0	0
		YBR279W	0	0	0	0	0	0	0	0	0	0	0	0	0	0	0	0	0	0	0	0	0	0	0	0	0	0	0	0	0	0							YBR279W	0	0	0	0	0	0	0	0	0	0
		YBR280C	1054	908	1051	736	728	863	782	856	866	1080	969	921	848	891	815	742	935	954	785	855	676	772	483	420	308	330	202	167	576	734							YBR280C	0.000372961	0.000339307	0.000364892	0.000322618	0.000357004	0.000346046	0.000342541	0.000354138	0.000339159	0.000377858
		YBR281C	0	0	0	0	0	0	0	0	0	0	0	0	0	0	0	0	0	0	0	0	0	0	0	0	0	0	0	0	0	0							YBR281C	0	0	0	0	0	0	0	0	0	0
		YBR282W	0	0	0	0	0	0	0	0	0	0	0	0	0	0	0	0	0	0	0	0	0	0	0	0	0	0	0	0	0	0							YBR282W	0	0	0	0	0	0	0	0	0	0
		YBR283C	0	0	0	0	0	0	0	0	0	0	0	0	0	1	0	0	0	0	0	0	0	0	0	0	0	0	0	0	0	0							YBR283C	0	0	0	0	0	0	0	0	0	0
		YBR284W	0	0	0	0	0	0	0	0	0	0	0	0	0	0	0	0	0	0	0	0	0	0	0	0	0	0	0	0	0	0							YBR284W	0	0	0	0	0	0	0	0	0	0
		YBR285W	0	0	0	0	0	0	0	0	0	0	0	0	0	0	0	0	0	0	0	0	0	0	0	0	0	0	0	0	0	0							YBR285W	0	0	0	0	0	0	0	0	0	0
		YBR286W	0	0	0	0	0	0	0	0	0	0	0	0	0	1	0	0	0	0	0	0	0	0	0	0	0	0	0	0	0	0							YBR286W	0	0	0	0	0	0	0	0	0	0
		YBR287W	826	794	919	704	672	783	738	730	828	842	814	771	759	798	735	682	734	736	611	670	620	773	368	413	256	231	174	154	613	658							YBR287W	0.000292283	0.000296707	0.000319063	0.000308591	0.000329542	0.000313967	0.000323268	0.00030201	0.000324276	0.000294589
		YBR288C	0	0	0	2	0	0	0	0	0	0	0	0	0	0	0	0	0	0	0	0	0	0	0	0	0	0	0	0	0	1							YBR288C	0	0	0	8.76679e-07	0	0	0	0	0	0
		YBR289W	0	0	0	0	0	0	0	0	0	0	0	0	0	0	0	0	0	0	0	0	0	0	0	0	0	0	0	0	0	0							YBR289W	0	0	0	0	0	0	0	0	0	0
		YBR290W	0	0	0	0	0	0	0	0	0	0	0	0	0	0	0	0	0	0	0	0	0	0	0	0	0	1	0	0	0	0							YBR290W	0	0	0	0	0	0	0	0	0	0
		YBR291C	836	738	858	622	500	582	522	526	388	536	387	353	292	318	646	595	864	750	1153	1175	1702	2124	2406	2202	2424	1876	1685	1495	559	729							YBR291C	0.000295821	0.00027578	0.000297885	0.000272647	0.000245195	0.00023337	0.000228653	0.000217613	0.000151956	0.000187529
		YBR292C	0	0	0	0	0	0	0	0	0	0	0	0	0	0	1	0	0	2	0	0	0	0	0	0	0	0	0	0	0	1							YBR292C	0	0	0	0	0	0	0	0	0	0
		YBR293W	0	0	1	0	0	0	0	0	0	0	0	0	0	0	0	0	0	0	0	0	0	0	0	0	0	0	0	0	0	0							YBR293W	0	0	3.47185e-07	0	0	0	0	0	0	0
		YBR294W	866	850	969	687	607	791	725	798	801	938	875	864	698	763	657	604	807	841	815	764	625	854	513	494	283	245	194	172	582	788							YBR294W	0.000306437	0.000317633	0.000336423	0.000301139	0.000297667	0.000317175	0.000317573	0.000330142	0.000313702	0.000328177
		YBR295W	1	0	0	0	0	0	0	0	1	0	0	0	0	0	0	0	0	0	0	0	0	0	0	0	0	0	0	0	1	0							YBR295W	3.53853e-07	0	0	0	0	0	0	0	3.91638e-07	0
		YBR296C	0	0	0	0	0	0	0	0	0	0	0	0	0	0	0	0	0	0	0	0	0	0	0	0	0	0	0	0	0	0							YBR296C	0	0	0	0	0	0	0	0	0	0
		YBR296C-A	0	0	0	0	0	0	0	0	0	0	0	0	0	0	0	0	0	0	0	0	0	0	0	0	0	0	0	0	0	0							YBR296C-A	0	0	0	0	0	0	0	0	0	0
		YBR297W	0	0	0	0	0	0	0	0	0	0	0	0	0	1	0	1	0	0	0	0	0	0	0	0	0	0	0	0	0	0							YBR297W	0	0	0	0	0	0	0	0	0	0
		YBR298C	0	0	0	0	0	0	0	0	0	0	0	0	0	0	0	0	0	0	0	0	0	0	0	0	0	0	0	0	0	0							YBR298C	0	0	0	0	0	0	0	0	0	0
		YBR299W	1	0	0	0	0	0	0	0	0	0	0	0	0	0	0	0	0	0	0	0	0	0	0	0	0	0	0	0	0	0							YBR299W	3.53853e-07	0	0	0	0	0	0	0	0	0
		YBR300C	0	0	0	0	0	0	0	0	0	0	0	0	0	0	0	0	0	0	0	0	0	0	0	1	0	0	0	0	0	0							YBR300C	0	0	0	0	0	0	0	0	0	0
		YBR301W	0	0	0	0	0	0	0	0	0	0	0	0	0	0	0	0	0	0	0	0	0	0	0	0	0	0	0	0	1	0							YBR301W	0	0	0	0	0	0	0	0	0	0
		YCL001W	916	851	904	710	676	822	769	780	872	987	872	940	795	989	774	694	906	908	737	825	757	920	494	471	271	293	153	191	566	681							YCL001W	0.000324129	0.000318007	0.000313856	0.000311221	0.000331504	0.000329605	0.000336846	0.000322696	0.000341508	0.00034532
		YCL001W-A	0	0	0	0	0	0	0	0	0	0	0	0	0	0	0	0	0	0	0	0	0	0	0	0	0	0	0	0	0	0							YCL001W-A	0	0	0	0	0	0	0	0	0	0
		YCL001W-B	0	0	0	0	0	0	0	0	0	0	0	0	0	0	0	0	0	0	0	0	0	0	0	0	0	0	0	0	0	0							YCL001W-B	0	0	0	0	0	0	0	0	0	0
		YCL002C	0	0	0	0	0	0	1	0	0	0	0	0	0	0	0	0	0	0	0	0	0	0	0	0	0	0	1	0	0	0							YCL002C	0	0	0	0	0	0	4.38032e-07	0	0	0
		YCL005W	0	0	0	0	0	0	0	0	0	0	0	0	0	0	0	0	0	0	0	0	0	0	0	0	0	0	0	0	0	0							YCL005W	0	0	0	0	0	0	0	0	0	0
		YCL005W-A	0	0	0	0	0	0	0	0	0	0	0	0	0	0	0	0	0	0	0	0	0	0	0	0	0	0	0	0	0	0							YCL005W-A	0	0	0	0	0	0	0	0	0	0
		YCL006C	2058	1978	2226	1734	1490	1957	1881	1718	1989	2174	2018	2064	1721	1975	1647	1591	2110	2108	1713	1723	1572	1860	1177	1018	758	671	414	400	1217	1473							YCL006C	0.000728229	0.000739151	0.000772835	0.00076008	0.000730682	0.000784718	0.000823938	0.000710758	0.000778968	0.000760614
		YCL007C	0	0	0	0	0	0	0	0	0	0	0	0	0	0	0	0	0	0	0	0	0	0	0	0	0	0	0	0	0	1							YCL007C	0	0	0	0	0	0	0	0	0	0
		YCL008C	347	318	283	209	150	224	197	207	169	188	175	178	110	152	153	165	339	349	576	615	411	504	179	173	76	102	30	27	721	877							YCL008C	0.000122787	0.000118832	9.82534e-05	9.16129e-05	7.35586e-05	8.98195e-05	8.62923e-05	8.56384e-05	6.61868e-05	6.57753e-05
		YCL009C	600	652	652	455	327	460	379	428	452	454	431	409	365	355	508	405	599	634	874	786	919	1183	1088	938	843	672	441	418	615	785							YCL009C	0.000212312	0.000243643	0.000226365	0.000199444	0.000160358	0.000184451	0.000166014	0.000177069	0.00017702	0.00015884
		YCL010C	686	610	644	500	427	542	465	526	474	582	518	453	416	418	492	448	308	359	189	203	170	229	155	159	120	88	60	47	640	828							YCL010C	0.000242743	0.000227948	0.000223587	0.00021917	0.000209397	0.000217331	0.000203685	0.000217613	0.000185636	0.000203623
		YCL011C	768	628	653	524	530	641	576	574	594	693	618	545	529	602	552	493	714	768	718	756	722	830	499	427	327	358	202	317	487	577							YCL011C	0.000271759	0.000234675	0.000226712	0.00022969	0.000259907	0.000257028	0.000252306	0.000237471	0.000232633	0.000242459
		YCL012C	0	0	0	0	0	0	1	0	0	1	0	0	1	0	0	0	0	0	0	1	0	0	1	0	0	0	0	1	0	0							YCL012C	0	0	0	0	0	0	4.38032e-07	0	0	3.49868e-07
		YCL012W	932	920	1066	713	676	925	749	838	896	1016	944	896	841	876	830	744	939	981	732	945	800	1026	584	632	487	475	304	406	578	769							YCL012W	0.000329791	0.000343791	0.0003701	0.000312536	0.000331504	0.000370906	0.000328086	0.000346691	0.000350908	0.000355466
		YCL013W	971	939	1007	758	739	882	812	752	915	1012	988	938	819	932	709	770	969	971	807	850	761	1067	619	563	454	430	285	270	699	817							YCL013W	0.000343591	0.000350891	0.000349616	0.000332261	0.000362399	0.000353664	0.000355682	0.000311112	0.000358349	0.000354067
		YCL014W	0	0	0	0	0	0	0	0	0	0	0	0	0	0	0	0	0	0	0	0	0	0	0	0	0	0	0	0	0	0							YCL014W	0	0	0	0	0	0	0	0	0	0
		YCL016C	0	0	1	1	0	1	0	0	0	0	0	0	0	0	0	0	0	0	0	0	0	0	0	0	0	0	0	0	0	0							YCL016C	0	0	3.47185e-07	4.38339e-07	0	4.0098e-07	0	0	0	0
		YCL021W-A	0	0	0	0	0	0	0	0	0	0	0	0	0	0	0	0	0	0	0	0	0	0	0	0	0	0	0	0	0	0							YCL021W-A	0	0	0	0	0	0	0	0	0	0
		YCL022C	1153	979	1104	830	796	949	921	907	941	1040	1028	951	882	1016	950	830	961	1035	865	876	821	1041	665	544	488	464	216	287	610	877							YCL022C	0.000407992	0.000365838	0.000383293	0.000363822	0.000390351	0.00038053	0.000403427	0.000375237	0.000368531	0.000363863
		YCL023C	1938	2002	2204	1524	1358	1769	1554	1765	1837	2018	1985	1892	1723	1875	1704	1529	1962	1817	1586	1678	1383	1789	1020	1016	752	697	382	443	1283	1541							YCL023C	0.000685767	0.000748119	0.000765196	0.000668029	0.00066595	0.000709333	0.000680701	0.000730202	0.000719439	0.000706035
		YCL024W	943	837	1027	765	597	821	753	795	795	910	934	823	768	861	730	670	931	900	803	833	728	910	594	507	397	310	254	227	627	741							YCL024W	0.000333683	0.000312775	0.000356559	0.00033533	0.000292763	0.000329204	0.000329838	0.000328901	0.000311352	0.00031838
		YCL025C	1064	1177	1167	880	808	1043	950	975	1076	1117	1135	1009	1033	1130	1070	957	1205	1124	1000	1079	874	1378	782	695	522	462	315	255	723	1032							YCL025C	0.000376499	0.000439828	0.000405165	0.000385739	0.000396236	0.000418222	0.00041613	0.000403369	0.000421403	0.000390803
		YCL026C	1012	925	1031	814	738	905	880	884	861	1046	1033	955	823	947	831	752	832	861	656	754	413	500	166	165	115	104	80	95	497	637							YCL026C	0.000358099	0.000345659	0.000357948	0.000356808	0.000361908	0.000362887	0.000385468	0.000365722	0.0003372	0.000365962
		YCL026C-A	952	829	937	713	654	732	725	733	820	919	882	802	665	787	667	644	866	796	773	731	739	880	571	551	345	309	202	205	473	538							YCL026C-A	0.000336868	0.000309786	0.000325313	0.000312536	0.000320715	0.000293517	0.000317573	0.000303251	0.000321143	0.000321529
		YCL026C-B	0	0	0	0	0	0	0	0	0	0	0	0	0	0	0	0	0	0	0	0	0	0	0	0	0	0	0	0	0	0							YCL026C-B	0	0	0	0	0	0	0	0	0	0
		YCL027W	883	835	883	728	672	811	750	809	749	930	856	852	767	882	835	692	830	833	730	827	657	721	498	213	331	319	158	213	429	451							YCL027W	0.000312452	0.000312028	0.000306565	0.000319111	0.000329542	0.000325195	0.000328524	0.000334693	0.000293337	0.000325378
		YCL028W	929	915	1018	792	703	869	767	793	905	966	881	882	806	883	745	676	955	908	894	906	816	1054	731	688	470	454	296	327	579	688							YCL028W	0.000328729	0.000341923	0.000353435	0.000347165	0.000344745	0.000348451	0.00033597	0.000328074	0.000354432	0.000337973
		YCL029C	701	755	663	582	533	661	517	572	545	648	596	581	529	572	687	608	712	756	571	638	672	737	619	522	672	588	462	511	568	642							YCL029C	0.000248051	0.000282133	0.000230184	0.000255113	0.000261378	0.000265048	0.000226462	0.000236643	0.000213443	0.000226715
		YCL030C	0	0	0	0	0	0	0	0	0	0	0	0	0	0	0	0	0	0	0	0	0	0	0	0	0	0	0	0	0	0							YCL030C	0	0	0	0	0	0	0	0	0	0
		YCL032W	1190	1090	1250	951	913	1132	999	1060	1162	1337	1315	1307	1146	1289	1002	938	1063	1012	900	943	686	919	329	316	157	206	101	122	549	690							YCL032W	0.000421085	0.000407318	0.000433982	0.000416861	0.000447727	0.000453909	0.000437594	0.000438535	0.000455083	0.000467774
		YCL033C	0	0	0	0	0	0	0	0	0	0	0	0	0	0	0	0	0	0	0	0	0	0	0	0	0	0	0	0	0	0							YCL033C	0	0	0	0	0	0	0	0	0	0
		YCL034W	0	0	1	0	1	0	0	0	0	0	0	0	0	0	0	0	0	0	0	0	0	0	0	0	0	0	1	0	0	0							YCL034W	0	0	3.47185e-07	0	4.90391e-07	0	0	0	0	0
		YCL035C	900	795	939	666	688	816	740	833	867	936	872	937	754	758	680	696	912	910	762	793	749	917	563	506	398	294	194	192	499	666							YCL035C	0.000318468	0.00029708	0.000326007	0.000291934	0.000337389	0.0003272	0.000324144	0.000344622	0.00033955	0.000327477
		YCL036W	215	309	360	280	270	387	364	354	246	451	369	377	332	411	310	290	201	275	207	211	65	42	25	5	20	22	15	13	52	54							YCL036W	7.60784e-05	0.000115469	0.000124987	0.000122735	0.000132405	0.000155179	0.000159444	0.000146454	9.6343e-05	0.000157791
		YCL037C	927	938	933	658	540	687	617	583	536	668	550	529	508	526	628	579	855	857	735	821	639	845	728	475	529	424	202	215	651	818							YCL037C	0.000328022	0.000350517	0.000323924	0.000288427	0.000264811	0.000275473	0.000270266	0.000241194	0.000209918	0.000233712
		YCL038C	787	754	798	636	555	662	619	658	615	707	703	716	569	688	605	544	623	616	506	532	497	574	329	272	217	202	143	134	513	637							YCL038C	0.000278482	0.000281759	0.000277054	0.000278784	0.000272167	0.000265449	0.000271142	0.000272223	0.000240857	0.000247357
		YCL039W	819	769	829	615	596	721	631	661	671	806	815	696	646	722	641	582	689	692	561	619	512	712	416	354	239	283	152	190	489	582							YCL039W	0.000289806	0.000287364	0.000287817	0.000269579	0.000292273	0.000289106	0.000276398	0.000273464	0.000262789	0.000281994
		YCL040W	0	0	0	0	0	0	0	0	0	0	0	0	0	0	0	0	0	0	0	0	0	0	0	0	0	0	0	0	0	0							YCL040W	0	0	0	0	0	0	0	0	0	0
		YCL042W	0	0	3	2	0	0	0	1	0	0	0	0	0	1	0	0	1	0	0	1	0	0	0	0	0	0	0	0	0	0							YCL042W	0	0	1.04156e-06	8.76679e-07	0	0	0	4.13712e-07	0	0
		YCL044C	0	0	0	0	0	0	0	0	0	0	0	0	0	0	0	0	0	0	0	0	0	0	0	0	0	0	0	0	0	0							YCL044C	0	0	0	0	0	0	0	0	0	0
		YCL045C	1031	1098	989	848	773	904	785	896	980	1133	954	963	904	1012	899	906	1133	1141	1150	1121	1217	1575	889	802	572	518	324	323	641	833							YCL045C	0.000364822	0.000410307	0.000343366	0.000371712	0.000379072	0.000362486	0.000343855	0.000370686	0.000383805	0.000396401
		YCL046W	4	7	1	6	6	6	3	4	3	5	2	8	1	6	5	1	6	5	6	4	8	4	5	4	6	5	2	0	2	3							YCL046W	1.41541e-06	2.6158e-06	3.47185e-07	2.63004e-06	2.94234e-06	2.40588e-06	1.3141e-06	1.65485e-06	1.17491e-06	1.74934e-06
		YCL047C	867	839	880	626	559	730	661	644	756	852	754	787	680	711	602	610	769	717	686	757	642	821	462	480	276	303	165	151	540	658							YCL047C	0.00030679	0.000313522	0.000305523	0.0002744	0.000274128	0.000292715	0.000289539	0.000266431	0.000296078	0.000298088
		YCL048W	913	787	805	660	653	764	716	811	750	858	848	758	725	785	722	599	814	806	693	788	707	937	582	566	362	313	192	192	609	690							YCL048W	0.000323068	0.000294091	0.000279484	0.000289304	0.000320225	0.000306349	0.000313631	0.000335521	0.000293729	0.000300187
		YCL049C	974	869	1066	758	652	914	868	823	868	1088	989	930	803	897	802	741	957	1024	783	888	737	999	638	584	424	374	206	243	600	747							YCL049C	0.000344653	0.000324733	0.0003701	0.000332261	0.000319735	0.000366496	0.000380212	0.000340485	0.000339942	0.000380657
		YCL050C	956	966	1076	697	695	857	908	789	829	1011	923	911	792	906	762	711	798	807	631	736	463	665	262	274	152	208	128	89	557	777							YCL050C	0.000338283	0.00036098	0.000373571	0.000305522	0.000340821	0.00034364	0.000397733	0.000326419	0.000324668	0.000353717
		YCL051W	1121	930	1082	810	676	945	911	890	1015	1037	974	1089	881	978	798	766	1178	1211	1116	1196	1068	1412	862	810	580	517	301	294	531	607							YCL051W	0.000396669	0.000347528	0.000375655	0.000355055	0.000331504	0.000378926	0.000399047	0.000368204	0.000397513	0.000362814
		YCL055W	948	932	1006	846	650	848	817	814	850	985	914	890	847	891	785	791	930	936	773	868	739	856	529	441	348	289	185	181	652	776							YCL055W	0.000335453	0.000348275	0.000349268	0.000370835	0.000318754	0.000340031	0.000357872	0.000336762	0.000332892	0.00034462
		YCL056C	0	0	0	0	0	0	0	0	0	0	0	0	0	0	0	0	0	0	0	0	0	0	0	0	0	0	0	0	0	0							YCL056C	0	0	0	0	0	0	0	0	0	0
		YCL057C-A	0	0	0	0	0	0	0	0	0	0	0	0	0	0	0	0	0	0	0	0	0	0	0	0	0	0	0	0	0	0							YCL057C-A	0	0	0	0	0	0	0	0	0	0
		YCL057W	962	934	1013	712	650	803	879	801	798	973	916	851	733	847	756	725	910	912	835	848	862	999	585	527	359	311	194	208	669	735							YCL057W	0.000340406	0.000349023	0.000351699	0.000312098	0.000318754	0.000321987	0.00038503	0.000331384	0.000312527	0.000340422
		YCL058C	19	22	16	14	4	13	4	4	1	2	3	1	0	0	4	2	2	2	3	3	3	0	0	1	5	0	1	2	191	192							YCL058C	6.72321e-06	8.22109e-06	5.55497e-06	6.13675e-06	1.96156e-06	5.21274e-06	1.75213e-06	1.65485e-06	3.91638e-07	6.99737e-07
		YCL060C	0	0	0	0	0	0	0	0	0	0	0	0	0	0	0	0	0	0	0	0	0	0	0	0	0	0	0	0	0	0							YCL060C	0	0	0	0	0	0	0	0	0	0
		YCL061C	0	0	0	0	0	0	0	0	0	0	0	0	0	0	0	0	0	0	0	0	0	0	0	0	0	0	0	0	0	0							YCL061C	0	0	0	0	0	0	0	0	0	0
		YCL062W	745	696	829	571	591	593	561	594	581	649	614	559	551	609	579	516	595	612	596	584	597	692	385	373	194	199	89	144	610	892							YCL062W	0.00026362	0.000260085	0.000287817	0.000250292	0.000289821	0.000237781	0.000245736	0.000245745	0.000227542	0.000227065
		YCL063W	835	740	826	561	557	631	537	529	573	647	674	676	597	611	591	520	579	577	585	499	537	630	398	291	231	191	94	135	661	721							YCL063W	0.000295467	0.000276527	0.000286775	0.000245908	0.000273148	0.000253018	0.000235223	0.000218854	0.000224409	0.000226365
		YCL064C	910	854	1022	688	640	783	708	739	784	777	821	822	753	873	784	723	1000	943	1122	1103	1007	1173	1053	969	993	759	484	454	644	811							YCL064C	0.000322006	0.000319128	0.000354823	0.000301577	0.00031385	0.000313967	0.000310127	0.000305733	0.000307044	0.000271848
		YCL069W	907	952	981	798	657	757	704	727	733	942	910	855	753	851	759	636	855	800	757	804	670	920	510	472	321	331	208	152	595	705							YCL069W	0.000320945	0.000355749	0.000340589	0.000349795	0.000322187	0.000303542	0.000308374	0.000300769	0.000287071	0.000329576
		YCL074W	1012	895	1072	847	688	846	829	800	818	986	928	861	744	849	776	760	955	928	892	900	833	1007	657	668	443	408	224	243	504	741							YCL074W	0.000358099	0.000334449	0.000372183	0.000371273	0.000337389	0.000339229	0.000363128	0.00033097	0.00032036	0.00034497
		YCL075W	1020	972	1064	814	705	893	849	771	895	918	933	936	782	832	827	774	980	998	857	871	791	959	650	563	369	311	172	152	645	758							YCL075W	0.00036093	0.000363223	0.000369405	0.000356808	0.000345725	0.000358075	0.000371889	0.000318972	0.000350516	0.000321179
		YCL076W	1040	890	1066	712	712	892	796	807	821	936	904	833	786	900	780	708	929	963	782	908	834	967	635	629	378	330	231	224	625	804							YCL076W	0.000368007	0.00033258	0.0003701	0.000312098	0.000349158	0.000357674	0.000348673	0.000333866	0.000321535	0.000327477
		YCR001W	833	876	941	727	652	836	738	870	786	940	921	862	779	890	740	690	857	897	751	819	585	772	413	270	241	244	141	154	510	587							YCR001W	0.000294759	0.000327349	0.000326701	0.000318673	0.000319735	0.000335219	0.000323268	0.00035993	0.000307828	0.000328876
		YCR002C	0	0	0	0	0	0	0	0	0	0	0	0	0	0	0	0	0	0	0	0	0	0	0	0	0	0	0	0	0	0							YCR002C	0	0	0	0	0	0	0	0	0	0
		YCR003W	334	317	345	261	191	311	245	234	249	265	257	291	223	210	223	180	41	21	21	25	24	15	16	18	19	21	16	18	488	643							YCR003W	0.000118187	0.000118458	0.000119779	0.000114407	9.36646e-05	0.000124705	0.000107318	9.68087e-05	9.75179e-05	9.27151e-05
		YCR004C	859	716	835	605	546	698	645	708	665	891	730	705	625	666	583	528	687	720	561	599	505	650	361	438	268	281	148	140	492	653							YCR004C	0.00030396	0.000267559	0.0002899	0.000265195	0.000267753	0.000279884	0.000282531	0.000292908	0.000260439	0.000311733
		YCR005C	831	793	888	658	594	795	713	728	673	860	793	707	618	751	703	556	756	733	607	654	542	690	363	267	225	179	151	110	534	708							YCR005C	0.000294052	0.000296333	0.000308301	0.000288427	0.000291292	0.000318779	0.000312317	0.000301183	0.000263572	0.000300887
		YCR006C	79	143	164	137	100	167	136	144	92	205	158	151	162	157	141	123	102	173	100	84	58	42	39	8	21	29	16	11	29	23							YCR006C	2.79544e-05	5.34371e-05	5.69384e-05	6.00525e-05	4.90391e-05	6.69636e-05	5.95723e-05	5.95746e-05	3.60307e-05	7.1723e-05
		YCR007C	855	816	916	688	598	728	693	777	784	957	949	783	733	788	671	679	859	831	738	768	681	860	572	388	361	321	177	249	575	727							YCR007C	0.000302544	0.000304928	0.000318022	0.000301577	0.000293254	0.000291913	0.000303556	0.000321454	0.000307044	0.000334824
		YCR008W	1395	1420	1549	1212	1096	1322	1211	1294	1357	1537	1474	1436	1415	1515	1310	1280	2239	2272	3211	3255	3563	4381	4826	4434	5111	4196	3509	3671	585	802							YCR008W	0.000493625	0.000530634	0.00053779	0.000531267	0.000537468	0.000530095	0.000530457	0.000535344	0.000531453	0.000537748
		YCR009C	0	0	0	0	0	0	0	0	0	0	0	0	0	0	0	0	0	0	0	0	0	0	0	0	0	0	0	0	0	0							YCR009C	0	0	0	0	0	0	0	0	0	0
		YCR010C	838	840	893	699	621	783	806	693	748	827	771	732	740	779	699	665	851	922	789	847	727	889	568	452	296	268	186	152	594	738							YCR010C	0.000296529	0.000313896	0.000310037	0.000306399	0.000304533	0.000313967	0.000353054	0.000286703	0.000292945	0.000289341
		YCR011C	796	761	845	682	592	733	661	702	730	836	763	775	659	761	597	594	768	792	715	796	745	894	550	509	347	306	219	225	593	696							YCR011C	0.000281667	0.000284375	0.000293372	0.000298947	0.000290311	0.000293918	0.000289539	0.000290426	0.000285896	0.00029249
		YCR014C	987	958	1104	871	683	985	851	901	945	1121	1044	968	862	974	898	749	1014	1030	793	918	828	1067	694	548	476	334	232	271	610	785							YCR014C	0.000349253	0.000357991	0.000383293	0.000381793	0.000334937	0.000394965	0.000372765	0.000372755	0.000370098	0.000392203
		YCR015C	991	1010	1126	785	703	973	870	899	891	1111	1029	945	856	950	840	802	1109	1054	987	983	829	1093	747	713	511	461	297	270	669	793							YCR015C	0.000350668	0.000377423	0.000390931	0.000344096	0.000344745	0.000390153	0.000381088	0.000371927	0.00034895	0.000388704
		YCR016W	861	850	949	704	588	730	649	628	682	741	721	692	583	706	654	555	723	757	729	789	588	793	434	458	244	221	155	127	618	811							YCR016W	0.000304667	0.000317633	0.000329479	0.000308591	0.00028835	0.000292715	0.000284283	0.000259811	0.000267097	0.000259253
		YCR017C	598	594	664	464	454	516	503	589	512	624	576	553	527	577	476	491	506	596	465	488	578	754	621	618	534	425	347	393	678	776							YCR017C	0.000211604	0.000221969	0.000230531	0.000203389	0.000222637	0.000206906	0.00022033	0.000243677	0.000200519	0.000218318
		YCR019W	1065	1082	1291	1033	916	1093	1075	1069	1146	1280	1135	1168	1128	1166	991	980	1009	917	786	801	439	564	202	168	127	120	72	108	726	945							YCR019W	0.000376853	0.000404328	0.000448216	0.000452804	0.000449198	0.000438271	0.000470884	0.000442258	0.000448817	0.000447832
		YCR020C	1524	1502	1722	1203	1170	1352	1289	1392	1400	1538	1468	1436	1314	1431	1323	1192	1477	1452	1263	1198	1041	1387	854	664	474	402	304	265	1123	1520							YCR020C	0.000539272	0.000561276	0.000597853	0.000527322	0.000573757	0.000542125	0.000564623	0.000575887	0.000548293	0.000538098
		YCR020C-A	0	0	0	1	1	0	0	0	0	0	1	2	0	0	1	0	0	0	0	0	0	0	0	0	0	0	0	0	1	0							YCR020C-A	0	0	0	4.38339e-07	4.90391e-07	0	0	0	0	0
		YCR020W-B	0	0	0	0	0	0	0	0	0	0	0	0	0	0	0	0	0	0	0	0	0	0	0	0	0	0	0	0	0	0							YCR020W-B	0	0	0	0	0	0	0	0	0	0
		YCR021C	978	899	1074	802	677	852	794	768	862	946	946	804	768	875	728	728	842	919	799	856	710	901	602	595	428	375	256	224	664	842							YCR021C	0.000346068	0.000335944	0.000372877	0.000351548	0.000331994	0.000341635	0.000347797	0.000317731	0.000337592	0.000330976
		YCR022C	922	900	1061	745	687	845	821	859	858	994	893	1006	773	884	735	677	927	843	714	803	691	954	526	578	397	356	157	222	613	731							YCR022C	0.000326252	0.000336317	0.000368364	0.000326563	0.000336898	0.000338828	0.000359624	0.000355379	0.000336025	0.000347769
		YCR023C	871	767	950	721	586	764	783	758	803	913	826	789	703	837	727	624	863	792	710	720	629	802	491	472	315	249	176	190	607	698							YCR023C	0.000308206	0.000286617	0.000329826	0.000316043	0.000287369	0.000306349	0.000342979	0.000313594	0.000314485	0.00031943
		YCR024C	0	0	0	0	0	0	0	0	0	0	0	0	0	0	0	0	0	0	0	0	0	0	0	0	0	0	0	0	0	0							YCR024C	0	0	0	0	0	0	0	0	0	0
		YCR024C-A	0	0	0	0	0	0	0	0	0	0	0	0	0	0	0	0	0	0	0	0	0	0	0	0	0	0	0	0	0	0							YCR024C-A	0	0	0	0	0	0	0	0	0	0
		YCR025C	973	965	1034	761	689	917	783	863	775	936	829	830	680	777	648	616	1018	1084	1144	1020	764	879	436	300	216	206	124	98	413	445							YCR025C	0.000344299	0.000360607	0.00035899	0.000333576	0.000337879	0.000367699	0.000342979	0.000357034	0.000303519	0.000327477
		YCR026C	0	0	0	0	0	0	0	0	0	0	0	0	0	0	0	0	0	0	0	0	0	0	0	0	0	0	0	0	0	0							YCR026C	0	0	0	0	0	0	0	0	0	0
		YCR027C	966	874	1088	727	690	806	820	749	814	932	914	903	780	917	761	690	770	800	601	599	603	732	438	387	303	253	154	180	585	798							YCR027C	0.000341822	0.000326601	0.000377738	0.000318673	0.000338369	0.00032319	0.000359186	0.00030987	0.000318793	0.000326077
		YCR028C	1056	1098	952	670	549	683	569	578	472	498	420	347	273	331	642	684	905	982	728	838	396	425	343	221	329	275	249	261	925	1055							YCR028C	0.000373669	0.000410307	0.00033052	0.000293687	0.000269224	0.000273869	0.00024924	0.000239126	0.000184853	0.000174234
		YCR028C-A	0	0	0	0	0	0	0	0	0	0	0	0	0	0	0	0	0	0	0	0	0	0	0	0	0	0	0	0	0	0							YCR028C-A	0	0	0	0	0	0	0	0	0	0
		YCR030C	1115	965	1139	897	781	963	884	1001	960	1236	1079	1007	1013	1073	877	792	1173	1204	1132	1209	1007	1216	687	782	578	412	235	258	580	728							YCR030C	0.000394546	0.000360607	0.000395444	0.00039319	0.000382995	0.000386144	0.00038722	0.000414126	0.000375973	0.000432437
		YCR031C	749	737	738	492	351	486	369	420	348	416	342	364	294	333	428	421	634	610	941	1037	1421	1673	2317	1919	1017	872	291	299	556	630							YCR031C	0.000265036	0.000275406	0.000256223	0.000215663	0.000172127	0.000194876	0.000161634	0.000173759	0.00013629	0.000145545
		YCR032W	913	915	1010	742	630	824	746	800	758	955	937	839	786	899	691	662	851	779	642	693	601	773	562	543	402	323	190	221	583	744							YCR032W	0.000323068	0.000341923	0.000350657	0.000325248	0.000308946	0.000330407	0.000326772	0.00033097	0.000296862	0.000334124
		YCR033W	2287	2138	2288	1747	1543	1982	1777	1945	1941	2200	1977	2019	1749	1817	1743	1642	4341	4526	11385	11132	24873	28880	78491	70640	180345	162169	216098	209474	844	1085							YCR033W	0.000809262	0.00079894	0.00079436	0.000765779	0.000756673	0.000794742	0.000778383	0.00080467	0.000760169	0.000769711
		YCR034W	88	92	89	70	55	43	32	40	23	35	17	25	8	14	54	33	39	25	39	31	25	29	25	16	13	11	7	11	402	517							YCR034W	3.11391e-05	3.43791e-05	3.08995e-05	3.06837e-05	2.69715e-05	1.72421e-05	1.4017e-05	1.65485e-05	9.00768e-06	1.22454e-05
		YCR036W	921	804	913	636	563	696	667	646	704	857	751	756	726	712	634	586	774	744	576	713	625	883	485	546	306	277	204	213	605	708							YCR036W	0.000325899	0.000300443	0.00031698	0.000278784	0.00027609	0.000279082	0.000292167	0.000267258	0.000275713	0.000299837
		YCR037C	892	854	965	759	608	817	673	803	848	966	938	865	832	825	781	695	922	923	779	789	709	886	588	569	353	353	226	210	534	729							YCR037C	0.000315637	0.000319128	0.000335034	0.000332699	0.000298157	0.000327601	0.000294795	0.000332211	0.000332109	0.000337973
		YCR043C	0	0	0	0	0	0	0	0	0	0	0	0	0	0	0	0	0	0	0	0	0	0	0	0	0	0	0	0	0	0							YCR043C	0	0	0	0	0	0	0	0	0	0
		YCR044C	87	76	90	44	27	41	38	35	32	42	21	31	22	26	25	20	9	22	9	12	8	8	25	4	21	13	8	5	258	393							YCR044C	3.07852e-05	2.84001e-05	3.12467e-05	1.92869e-05	1.32405e-05	1.64402e-05	1.66452e-05	1.44799e-05	1.25324e-05	1.46945e-05
		YCR045C	0	0	0	0	0	0	0	0	0	0	0	0	0	0	0	0	0	0	0	0	0	0	0	0	0	0	0	0	0	0							YCR045C	0	0	0	0	0	0	0	0	0	0
		YCR046C	0	0	0	0	0	0	0	0	0	0	0	0	0	0	0	0	0	0	0	0	0	0	0	0	0	0	0	0	0	0							YCR046C	0	0	0	0	0	0	0	0	0	0
		YCR047C	0	0	0	0	0	0	0	0	0	0	0	0	0	0	0	0	0	0	0	0	0	0	0	0	0	0	0	0	0	0							YCR047C	0	0	0	0	0	0	0	0	0	0
		YCR048W	846	782	900	712	699	828	738	781	771	964	847	881	740	791	721	650	817	887	721	831	713	919	581	464	315	317	160	205	465	577							YCR048W	0.00029936	0.000292222	0.000312467	0.000312098	0.000342783	0.000332011	0.000323268	0.000323109	0.000301953	0.000337273
		YCR049C	963	941	1003	745	715	823	813	806	909	1044	961	965	858	874	749	711	892	918	789	869	726	939	631	548	373	328	219	217	589	729							YCR049C	0.00034076	0.000351638	0.000348227	0.000326563	0.000350629	0.000330006	0.00035612	0.000333452	0.000355999	0.000365263
		YCR050C	0	0	0	0	0	0	0	0	0	0	1	0	0	0	0	0	0	0	0	0	0	0	0	0	0	0	1	0	0	0							YCR050C	0	0	0	0	0	0	0	0	0	0
		YCR051W	914	858	947	751	586	758	672	696	786	846	681	716	591	758	731	619	1008	1061	1039	1147	1040	1349	985	822	641	553	270	299	596	760							YCR051W	0.000323422	0.000320622	0.000328785	0.000329193	0.000287369	0.000303943	0.000294357	0.000287944	0.000307828	0.000295989
		YCR053W	788	709	707	628	510	615	655	585	654	784	731	671	614	650	544	480	705	654	495	640	570	773	468	389	267	224	192	131	414	516							YCR053W	0.000278836	0.000264943	0.00024546	0.000275277	0.000250099	0.000246603	0.000286911	0.000242022	0.000256131	0.000274297
		YCR059C	937	867	1029	835	648	870	804	918	871	1081	1045	946	848	943	781	692	923	965	831	842	723	962	692	533	416	357	211	278	542	737							YCR059C	0.00033156	0.000323986	0.000357254	0.000366013	0.000317773	0.000348852	0.000352178	0.000379788	0.000341117	0.000378208
		YCR060W	2040	1710	1946	1418	1281	1641	1478	1625	1661	1891	1808	1763	1575	1722	1368	1372	1646	1727	1446	1693	1481	1924	1262	1228	791	710	418	445	1052	1387							YCR060W	0.00072186	0.000639003	0.000675623	0.000621565	0.00062819	0.000658008	0.000647411	0.000672282	0.000650511	0.000661601
		YCR061W	0	0	0	0	0	0	0	0	0	0	0	0	0	1	0	0	0	0	0	0	0	0	0	0	0	0	0	0	0	0							YCR061W	0	0	0	0	0	0	0	0	0	0
		YCR062W	0	0	0	0	0	0	0	0	0	0	0	0	0	0	0	0	0	1	0	0	0	0	0	0	0	0	0	0	0	0							YCR062W	0	0	0	0	0	0	0	0	0	0
		YCR063W	0	0	0	0	0	0	0	0	0	0	0	0	0	0	0	0	0	0	0	0	0	0	0	0	0	0	0	0	0	0							YCR063W	0	0	0	0	0	0	0	0	0	0
		YCR064C	0	0	0	0	0	0	0	0	0	0	0	0	0	0	0	0	0	0	0	0	0	0	0	0	0	0	0	0	0	0							YCR064C	0	0	0	0	0	0	0	0	0	0
		YCR065W	767	666	750	615	588	668	684	680	691	892	750	747	686	738	591	503	866	906	926	930	807	1046	732	648	546	480	310	265	458	570							YCR065W	0.000271405	0.000248875	0.000260389	0.000269579	0.00028835	0.000267855	0.000299614	0.000281324	0.000270622	0.000312083
		YCR066W	0	0	0	0	0	0	0	0	0	0	0	0	0	0	0	0	0	0	0	0	0	0	0	0	0	0	0	0	0	0							YCR066W	0	0	0	0	0	0	0	0	0	0
		YCR067C	970	892	1072	747	675	902	799	882	832	969	898	897	909	939	757	740	789	870	743	790	693	956	618	545	438	321	212	177	542	696							YCR067C	0.000343237	0.000333328	0.000372183	0.000327439	0.000331014	0.000361684	0.000349987	0.000364894	0.000325843	0.000339023
		YCR068W	894	877	964	704	642	830	864	767	875	933	890	844	831	917	717	644	949	896	753	801	805	938	622	569	371	373	207	189	658	794							YCR068W	0.000316345	0.000327722	0.000334687	0.000308591	0.000314831	0.000332813	0.00037846	0.000317317	0.000342683	0.000326427
		YCR069W	1036	904	1047	791	725	880	885	789	964	977	1006	877	810	833	756	703	935	914	800	878	799	970	597	583	358	299	209	170	519	664							YCR069W	0.000366592	0.000337812	0.000363503	0.000346726	0.000355533	0.000352862	0.000387658	0.000326419	0.000377539	0.000341821
		YCR071C	0	0	0	0	0	0	0	0	0	0	0	0	0	0	0	0	0	0	0	0	0	0	0	0	0	0	0	0	0	0							YCR071C	0	0	0	0	0	0	0	0	0	0
		YCR073C	911	818	1039	734	660	839	791	742	808	901	944	832	775	863	709	656	810	794	654	716	647	859	559	440	346	245	253	160	529	679							YCR073C	0.00032236	0.000305675	0.000360726	0.000321741	0.000323658	0.000336422	0.000346483	0.000306974	0.000316444	0.000315231
		YCR073W-A	79	89	152	112	102	156	151	147	80	181	125	136	113	119	108	106	82	124	91	92	22	26	17	4	10	14	10	12	30	30							YCR073W-A	2.79544e-05	3.3258e-05	5.27722e-05	4.9094e-05	5.00198e-05	6.25529e-05	6.61428e-05	6.08157e-05	3.1331e-05	6.33262e-05
		YCR075C	822	810	899	690	658	897	804	818	806	1076	903	959	862	887	746	750	975	947	783	881	760	946	577	672	468	406	236	218	552	631							YCR075C	0.000290867	0.000302685	0.00031212	0.000302454	0.000322677	0.000359679	0.000352178	0.000338417	0.00031566	0.000376458
		YCR075W-A	0	0	0	0	0	0	0	0	0	0	0	0	0	0	0	0	0	0	0	0	0	0	0	0	0	0	0	0	0	0							YCR075W-A	0	0	0	0	0	0	0	0	0	0
		YCR076C	866	724	738	561	541	602	616	567	653	775	666	617	598	608	501	475	647	660	551	598	552	790	406	448	252	214	136	143	485	539							YCR076C	0.000306437	0.000270549	0.000256223	0.000245908	0.000265301	0.00024139	0.000269828	0.000234575	0.00025574	0.000271148
		YCR077C	0	0	0	0	0	0	0	0	0	0	0	0	0	0	0	0	0	0	0	0	0	0	0	0	0	0	0	0	0	0							YCR077C	0	0	0	0	0	0	0	0	0	0
		YCR079W	692	652	703	556	531	657	555	594	590	706	660	644	665	664	578	552	506	602	461	536	483	569	346	206	456	445	485	530	547	671							YCR079W	0.000244866	0.000243643	0.000244071	0.000243717	0.000260397	0.000263444	0.000243108	0.000245745	0.000231066	0.000247007
		YCR081W	0	0	0	0	0	0	0	0	0	0	0	0	0	0	0	0	0	0	0	0	0	0	0	0	0	0	0	0	0	0							YCR081W	0	0	0	0	0	0	0	0	0	0
		YCR082W	846	840	1001	728	616	854	734	786	705	905	866	797	731	837	770	665	918	916	750	830	650	788	545	336	397	343	273	273	447	492							YCR082W	0.00029936	0.000313896	0.000347533	0.000319111	0.000302081	0.000342437	0.000321515	0.000325178	0.000276105	0.000316631
		YCR083W	931	856	984	771	688	837	771	780	776	940	935	817	791	883	764	703	915	936	863	864	924	1119	656	770	430	476	265	276	511	687							YCR083W	0.000329437	0.000319875	0.00034163	0.00033796	0.000337389	0.00033562	0.000337723	0.000322696	0.000303911	0.000328876
		YCR084C	0	0	0	0	0	0	0	0	0	0	0	0	0	0	0	0	0	0	0	0	0	0	0	0	0	0	0	0	0	0							YCR084C	0	0	0	0	0	0	0	0	0	0
		YCR085W	862	727	864	657	506	693	628	632	700	802	778	732	639	687	632	593	826	822	658	629	600	839	511	490	271	274	177	177	552	652							YCR085W	0.000305021	0.00027167	0.000299968	0.000287989	0.000248138	0.000277879	0.000275084	0.000261466	0.000274147	0.000280595
		YCR086W	0	0	0	0	0	0	0	0	0	0	0	0	0	0	0	0	0	0	0	0	0	0	0	0	0	0	0	0	0	0							YCR086W	0	0	0	0	0	0	0	0	0	0
		YCR087C-A	816	802	901	667	549	714	709	691	723	791	809	762	643	721	620	564	787	839	704	728	690	830	533	437	328	311	174	182	519	649							YCR087C-A	0.000288744	0.000299696	0.000312814	0.000292372	0.000269224	0.0002863	0.000310565	0.000285875	0.000283154	0.000276746
		YCR087W	857	832	1025	637	654	892	757	758	749	900	854	760	758	776	769	668	836	801	799	817	603	789	433	379	244	214	125	116	676	817							YCR087W	0.000303252	0.000310907	0.000355865	0.000279222	0.000320715	0.000357674	0.00033159	0.000313594	0.000293337	0.000314882
		YCR088W	947	923	1003	749	684	823	807	829	877	986	902	876	851	809	783	681	1151	1220	1115	1183	1140	1543	1267	1222	1157	952	721	663	532	701							YCR088W	0.000335099	0.000344912	0.000348227	0.000328316	0.000335427	0.000330006	0.000353492	0.000342967	0.000343467	0.00034497
		YCR089W	0	0	0	0	0	0	0	0	0	0	0	0	0	0	0	0	0	0	0	0	0	0	0	0	0	0	0	0	0	0							YCR089W	0	0	0	0	0	0	0	0	0	0
		YCR090C	780	751	769	610	557	684	671	639	722	828	808	762	674	670	633	497	729	839	680	740	599	762	517	469	319	287	169	148	539	611							YCR090C	0.000276005	0.000280638	0.000266986	0.000267387	0.000273148	0.00027427	0.000293919	0.000264362	0.000282763	0.000289691
		YCR091W	817	770	919	653	632	749	759	710	775	958	849	806	751	752	718	654	833	904	706	716	680	840	478	524	329	305	206	160	559	736							YCR091W	0.000289098	0.000287738	0.000319063	0.000286236	0.000309927	0.000300334	0.000332466	0.000293736	0.000303519	0.000335174
		YCR092C	737	674	825	619	509	597	567	634	584	674	679	642	560	588	520	500	686	661	552	582	387	542	340	323	205	186	102	125	586	721							YCR092C	0.00026079	0.000251864	0.000286428	0.000271332	0.000249609	0.000239385	0.000248364	0.000262294	0.000228717	0.000235811
		YCR094W	372	391	347	261	251	275	227	246	220	245	238	221	203	238	183	169	143	142	118	110	101	128	66	107	72	59	65	68	455	615							YCR094W	0.000131633	0.000146111	0.000120473	0.000114407	0.000123088	0.000110269	9.94332e-05	0.000101773	8.61604e-05	8.57178e-05
		YCR095C	937	862	939	690	622	755	662	671	729	796	786	742	656	694	672	625	884	882	940	906	728	873	363	387	174	134	61	53	605	757							YCR095C	0.00033156	0.000322117	0.000326007	0.000302454	0.000305023	0.00030274	0.000289977	0.000277601	0.000285504	0.000278495
		YCR095W-A	0	0	0	0	0	0	0	0	0	0	0	0	0	0	0	0	0	0	0	0	0	0	0	0	0	0	0	0	0	0							YCR095W-A	0	0	0	0	0	0	0	0	0	0
		YCR098C	908	810	928	686	602	780	717	803	778	872	782	801	749	767	749	627	822	844	720	742	654	892	494	464	307	276	234	175	653	758							YCR098C	0.000321298	0.000302685	0.000322188	0.000300701	0.000295215	0.000312764	0.000314069	0.000332211	0.000304694	0.000305085
		YCR099C	0	0	0	0	0	0	0	0	0	0	0	0	0	0	0	0	0	0	0	0	1	0	0	0	0	0	0	0	0	0							YCR099C	0	0	0	0	0	0	0	0	0	0
		YCR100C	0	0	0	0	0	0	0	0	0	0	0	0	0	0	0	0	0	0	0	0	0	1	0	0	0	0	0	0	0	0							YCR100C	0	0	0	0	0	0	0	0	0	0
		YCR101C	701	686	760	590	595	626	624	651	611	727	750	679	559	636	586	530	714	707	673	628	564	710	405	364	287	218	162	112	608	684							YCR101C	0.000248051	0.000256348	0.000263861	0.00025862	0.000291782	0.000251013	0.000273332	0.000269327	0.000239291	0.000254354
		YCR102C	737	779	892	649	583	679	679	633	646	802	731	682	642	744	651	616	746	705	711	752	614	820	386	422	267	235	113	157	703	817							YCR102C	0.00026079	0.000291101	0.000309689	0.000284482	0.000285898	0.000272265	0.000297424	0.00026188	0.000252998	0.000280595
		YCR102W-A	1006	910	1132	834	736	901	816	847	870	1009	966	922	855	858	849	790	1055	998	877	933	785	1013	610	585	388	366	179	192	644	792							YCR102W-A	0.000355976	0.000340054	0.000393014	0.000365575	0.000360927	0.000361283	0.000357434	0.000350414	0.000340725	0.000353017
		YCR105W	737	715	813	615	551	689	547	604	620	776	714	692	602	635	539	519	737	722	621	670	621	767	491	560	335	276	203	190	522	686							YCR105W	0.00026079	0.000267185	0.000282262	0.000269579	0.000270205	0.000276275	0.000239603	0.000249882	0.000242816	0.000271498
		YCR106W	781	742	827	579	455	715	558	704	647	826	755	689	649	725	643	603	722	736	654	666	617	866	495	470	366	271	203	185	598	732							YCR106W	0.000276359	0.000277275	0.000287122	0.000253798	0.000223128	0.000286701	0.000244422	0.000291253	0.00025339	0.000288991
		YCR107W	654	583	677	454	421	477	463	533	527	568	569	525	537	464	501	419	563	546	508	566	516	763	525	517	348	328	191	254	402	552							YCR107W	0.00023142	0.000217859	0.000235044	0.000199006	0.000206454	0.000191267	0.000202809	0.000220509	0.000206393	0.000198725
		YDL001W	749	671	553	457	387	436	398	469	474	519	469	476	425	415	457	437	396	424	393	454	566	761	771	740	552	549	314	388	510	593							YDL001W	0.000265036	0.000250743	0.000191993	0.000200321	0.000189781	0.000174827	0.000174337	0.000194031	0.000185636	0.000181582
		YDL002C	919	798	832	590	567	570	550	575	583	636	581	562	394	495	511	502	777	820	1459	1561	1621	1934	1068	1041	406	352	169	165	484	609							YDL002C	0.000325191	0.000298201	0.000288858	0.00025862	0.000278051	0.000228559	0.000240918	0.000237885	0.000228325	0.000222516
		YDL006W	348	293	257	203	219	226	217	207	202	227	197	190	170	186	125	122	35	43	28	34	29	36	35	23	35	43	19	20	661	833							YDL006W	0.000123141	0.00010949	8.92266e-05	8.89829e-05	0.000107396	9.06214e-05	9.50529e-05	8.56384e-05	7.91109e-05	7.94201e-05
		YDL009C	1312	1168	1184	963	899	1071	974	989	1072	1160	1167	1153	907	957	935	877	1453	1490	2483	2804	4401	5285	6365	5231	5316	5116	3249	3913	528	737							YDL009C	0.000464255	0.000436465	0.000411067	0.000422121	0.000440861	0.000429449	0.000426643	0.000409161	0.000419836	0.000405847
		YDL010W	1286	1301	1249	1056	1012	1179	1047	1250	1335	1433	1325	1237	1127	1365	1095	1063	1177	1230	1053	1116	961	1156	875	669	516	493	292	299	761	947							YDL010W	0.000455055	0.000486165	0.000433634	0.000462886	0.000496275	0.000472755	0.000458619	0.00051714	0.000522837	0.000501362
		YDL011C	1144	1114	1163	973	852	1022	1006	1009	1120	1282	1098	1147	985	1101	959	835	1043	1079	911	1064	872	1100	780	707	547	493	267	333	574	606							YDL011C	0.000404808	0.000416286	0.000403777	0.000426504	0.000417813	0.000409801	0.00044066	0.000417436	0.000438635	0.000448531
		YDL012C	1308	1262	1313	1040	1035	1161	1083	1165	1290	1444	1284	1221	1162	1296	1074	1062	1331	1210	1107	1211	1000	1226	771	689	543	501	263	305	662	894							YDL012C	0.00046284	0.000471591	0.000455854	0.000455873	0.000507554	0.000465538	0.000474388	0.000481975	0.000505213	0.00050521
		YDL013W	79	76	46	44	41	52	27	43	23	36	26	13	11	17	26	37	31	26	39	28	23	35	28	26	30	14	26	22	260	377							YDL013W	2.79544e-05	2.84001e-05	1.59705e-05	1.92869e-05	2.0106e-05	2.0851e-05	1.18269e-05	1.77896e-05	9.00768e-06	1.25953e-05
		YDL018C	1190	1060	1107	921	830	1032	945	949	1110	1212	1163	1166	986	1056	897	918	1081	1249	982	1081	900	1156	728	666	500	491	234	294	542	713							YDL018C	0.000421085	0.000396107	0.000384334	0.00040371	0.000407024	0.000413811	0.00041394	0.000392613	0.000434718	0.000424041
		YDL019C	1243	1117	1368	1053	949	1189	1174	1052	1191	1440	1333	1231	1135	1230	1009	960	1164	1176	1037	1140	814	905	688	397	472	591	271	292	438	461							YDL019C	0.000439839	0.000417407	0.00047495	0.000461571	0.000465381	0.000476765	0.000514249	0.000435225	0.000466441	0.000503811
		YDL020C	936	853	876	665	594	704	575	632	528	688	492	520	368	386	624	601	1717	1751	3797	4061	4892	5766	7773	5857	9910	7773	5496	4429	834	1077							YDL020C	0.000331206	0.000318754	0.000304134	0.000291496	0.000291292	0.00028229	0.000251868	0.000261466	0.000206785	0.00024071
		YDL021W	0	0	929	981	1091	1435	1369	1615	1598	2102	1733	1864	1464	1917	0	0	75	108	92	98	76	116	109	111	95	76	78	98	0	0							YDL021W	0	0	0.000322535	0.000430011	0.000535016	0.000575406	0.000599666	0.000668145	0.000625838	0.000735424
		YDL022W	963	934	974	798	744	814	742	833	931	942	920	845	811	853	818	732	884	930	720	800	711	906	562	520	387	314	221	211	631	818							YDL022W	0.00034076	0.000349023	0.000338159	0.000349795	0.000364851	0.000326398	0.00032502	0.000344622	0.000364615	0.000329576
		YDL023C	1797	1676	1840	1425	1441	1628	1525	1542	1665	1952	1655	1729	1527	1532	1516	1341	1724	1735	1516	1536	1557	1927	1200	876	676	640	367	419	1094	1322							YDL023C	0.000635874	0.000626297	0.000638821	0.000624633	0.000706653	0.000652795	0.000667999	0.000637944	0.000652077	0.000682943
		YDL024C	990	884	1017	810	738	884	787	851	1000	1051	925	975	810	917	789	738	883	951	821	856	718	821	579	485	383	272	171	179	564	692							YDL024C	0.000350314	0.000330338	0.000353087	0.000355055	0.000361908	0.000354466	0.000344731	0.000352069	0.000391638	0.000367712
		YDL025C	1172	1029	1151	924	879	1049	931	1067	1058	1250	1118	1106	914	1082	922	889	1092	1197	1219	1283	962	1212	698	679	316	312	187	172	632	817							YDL025C	0.000414716	0.000384523	0.00039961	0.000405025	0.000431053	0.000420628	0.000407808	0.000441431	0.000414353	0.000437336
		YDL026W	0	0	0	0	0	0	0	0	0	0	0	0	0	0	0	0	0	0	0	0	0	0	0	0	0	0	1	0	0	1							YDL026W	0	0	0	0	0	0	0	0	0	0
		YDL027C	1161	1033	1265	945	892	1005	966	999	1122	1193	1207	1138	906	1152	997	915	1134	1193	981	1124	887	1106	737	648	435	406	262	277	664	815							YDL027C	0.000410823	0.000386017	0.000439189	0.000414231	0.000437428	0.000402985	0.000423139	0.000413299	0.000439418	0.000417393
		YDL032W	334	301	296	188	160	267	218	258	244	241	189	206	155	209	185	169	67	44	25	27	21	9	17	8	9	4	8	5	484	650							YDL032W	0.000118187	0.000112479	0.000102767	8.24078e-05	7.84625e-05	0.000107062	9.54909e-05	0.000106738	9.55597e-05	8.43183e-05
		YDL033C	305	299	316	243	216	260	227	242	242	290	244	255	213	216	187	206	43	49	26	25	22	20	17	10	16	15	16	12	446	545							YDL033C	0.000107925	0.000111732	0.000109711	0.000106516	0.000105924	0.000104255	9.94332e-05	0.000100118	9.47764e-05	0.000101462
		YDL034W	0	0	0	0	0	0	0	0	0	0	0	0	0	0	0	0	0	0	0	0	0	0	0	0	0	0	1	0	0	0							YDL034W	0	0	0	0	0	0	0	0	0	0
		YDL035C	969	1007	1038	751	703	856	791	856	907	1031	964	872	722	756	774	735	1024	1119	1500	1645	2410	3129	6831	5037	14464	11894	16805	14892	523	716							YDL035C	0.000342883	0.000376302	0.000360378	0.000329193	0.000344745	0.000343239	0.000346483	0.000354138	0.000355216	0.000360714
		YDL036C	0	0	0	0	0	0	0	0	0	0	0	0	0	0	0	0	0	0	0	0	0	0	0	0	0	0	0	0	0	0							YDL036C	0	0	0	0	0	0	0	0	0	0
		YDL037C	3971	3592	3757	2975	2814	3459	3204	3455	3700	3863	3654	3650	3240	3592	3036	2806	3853	4125	3795	4040	3913	4865	3508	3306	2256	2068	1189	1362	1905	2298							YDL037C	0.00140515	0.00134228	0.00130438	0.00130406	0.00137996	0.00138699	0.00140345	0.00142938	0.00144906	0.00135154
		YDL038C	991	985	1096	829	777	960	931	923	998	1060	1001	906	901	970	885	772	929	1043	842	974	811	822	556	309	388	318	182	264	545	587							YDL038C	0.000350668	0.000368081	0.000380515	0.000363383	0.000381033	0.000384941	0.000407808	0.000381856	0.000390855	0.000370861
		YDL039C	0	0	0	0	0	0	0	0	0	0	0	0	0	0	0	0	0	0	0	0	0	0	0	0	0	0	0	0	0	0							YDL039C	0	0	0	0	0	0	0	0	0	0
		YDL040C	0	0	0	0	0	0	0	0	0	0	0	0	0	0	0	0	0	0	0	0	0	0	0	0	0	0	0	0	0	0							YDL040C	0	0	0	0	0	0	0	0	0	0
		YDL041W	0	0	0	0	0	0	0	0	0	0	0	0	0	0	0	0	0	0	0	0	0	0	0	0	0	0	0	0	0	0							YDL041W	0	0	0	0	0	0	0	0	0	0
		YDL042C	0	0	0	0	0	0	0	0	0	0	0	0	0	0	0	0	0	0	0	0	0	0	0	0	0	0	0	0	0	0							YDL042C	0	0	0	0	0	0	0	0	0	0
		YDL044C	1	1	2	3	1	0	0	0	0	0	3	1	1	0	0	0	0	0	0	0	0	0	0	0	0	0	0	0	1	0							YDL044C	3.53853e-07	3.73686e-07	6.94371e-07	1.31502e-06	4.90391e-07	0	0	0	0	0
		YDL045W-A	0	0	0	0	0	0	0	0	0	0	0	0	0	0	0	0	0	0	0	0	0	0	0	0	0	0	0	0	0	0							YDL045W-A	0	0	0	0	0	0	0	0	0	0
		YDL046W	0	0	0	0	0	0	0	0	0	0	0	0	0	0	0	0	0	0	0	0	0	0	0	0	0	0	0	0	0	0							YDL046W	0	0	0	0	0	0	0	0	0	0
		YDL047W	0	0	0	0	0	0	0	0	0	0	0	0	0	0	0	0	0	0	0	0	0	0	0	0	0	0	0	0	0	0							YDL047W	0	0	0	0	0	0	0	0	0	0
		YDL048C	1060	955	1080	804	718	768	873	868	924	962	988	910	833	855	779	752	916	923	748	838	777	839	582	548	382	284	170	218	611	723							YDL048C	0.000375084	0.00035687	0.00037496	0.000352425	0.0003521	0.000307953	0.000382402	0.000359102	0.000361874	0.000336573
		YDL049C	1055	1024	1141	874	793	924	894	951	999	1135	995	1004	835	958	750	796	979	990	885	941	875	1039	711	679	437	453	250	250	558	684							YDL049C	0.000373315	0.000382654	0.000396138	0.000383109	0.00038888	0.000370505	0.0003916	0.00039344	0.000391246	0.000397101
		YDL050C	1122	977	1111	962	907	1017	947	1029	1068	1179	1145	1062	962	1016	930	804	972	1019	804	933	745	909	525	556	331	360	173	351	607	707							YDL050C	0.000397023	0.000365091	0.000385723	0.000421682	0.000444784	0.000407796	0.000414816	0.00042571	0.000418269	0.000412495
		YDL051W	1175	1085	1120	978	863	994	1025	1015	1106	1239	1156	1051	916	1061	993	899	949	993	751	897	734	924	566	500	314	321	200	202	636	712							YDL051W	0.000415777	0.000405449	0.000388848	0.000428696	0.000423207	0.000398574	0.000448983	0.000419918	0.000433152	0.000433487
		YDL052C	1277	1197	1182	901	961	1082	975	1018	1030	1102	1064	994	955	969	902	923	1111	1143	1016	992	1237	1550	1453	1076	1112	973	728	675	734	877							YDL052C	0.00045187	0.000447302	0.000410373	0.000394944	0.000471265	0.00043386	0.000427081	0.000421159	0.000403387	0.000385555
		YDL053C	1	0	2	0	0	0	1	0	0	0	0	1	0	0	0	0	0	0	0	0	0	0	0	0	0	0	0	0	0	0							YDL053C	3.53853e-07	0	6.94371e-07	0	0	0	4.38032e-07	0	0	0
		YDL054C	1	1	0	1	0	1	0	0	0	0	0	2	0	0	1	2	3	0	0	0	1	0	1	3	0	1	0	0	0	0							YDL054C	3.53853e-07	3.73686e-07	0	4.38339e-07	0	4.0098e-07	0	0	0	0
		YDL056W	992	903	871	753	738	965	878	939	981	1064	972	930	920	1004	812	739	875	891	806	832	967	1187	1301	1144	1274	1145	837	845	530	706							YDL056W	0.000351022	0.000337438	0.000302398	0.000330069	0.000361908	0.000386946	0.000384592	0.000388476	0.000384197	0.00037226
		YDL057W	1055	940	975	833	788	875	850	861	923	979	1018	1004	847	908	783	670	710	724	546	641	442	645	393	352	237	254	157	142	642	734							YDL057W	0.000373315	0.000351265	0.000338506	0.000365137	0.000386428	0.000350857	0.000372327	0.000356206	0.000361482	0.000342521
		YDL059C	775	718	688	653	553	656	583	556	678	734	664	626	569	652	526	497	544	593	533	614	491	590	497	544	585	423	459	402	478	603							YDL059C	0.000274236	0.000268306	0.000238864	0.000286236	0.000271186	0.000263043	0.000255373	0.000230024	0.000265531	0.000256803
		YDL061C	0	0	0	0	0	0	0	0	0	0	0	0	0	0	0	0	0	0	0	0	0	0	0	0	0	0	0	0	0	0							YDL061C	0	0	0	0	0	0	0	0	0	0
		YDL062W	0	0	0	0	0	0	0	0	0	0	0	0	0	1	0	0	0	0	0	0	0	0	0	0	0	0	0	0	0	0							YDL062W	0	0	0	0	0	0	0	0	0	0
		YDL063C	1568	1450	1451	1138	885	1038	888	887	794	838	685	706	553	622	920	895	1205	1205	1808	1827	1752	2201	2362	1935	1583	1329	638	692	1230	1432							YDL063C	0.000554841	0.000541844	0.000503766	0.00049883	0.000433996	0.000416217	0.000388972	0.000366963	0.000310961	0.00029319
		YDL065C	0	0	0	0	0	0	0	0	0	0	0	0	0	0	0	0	0	0	0	0	0	0	0	0	0	0	0	0	0	0							YDL065C	0	0	0	0	0	0	0	0	0	0
		YDL066W	1099	1020	1097	862	762	908	896	918	974	1114	1025	1060	889	850	886	792	881	928	630	755	588	860	513	496	353	318	188	199	574	711							YDL066W	0.000388884	0.00038116	0.000380862	0.000377848	0.000373678	0.00036409	0.000392477	0.000379788	0.000381455	0.000389753
		YDL067C	400	431	400	311	306	327	292	316	293	400	273	302	275	296	284	280	47	56	18	27	19	24	31	14	20	17	18	22	533	643							YDL067C	0.000141541	0.000161059	0.000138874	0.000136324	0.00015006	0.00013112	0.000127905	0.000130733	0.00011475	0.000139947
		YDL068W	37	52	40	41	36	52	43	45	59	63	41	49	61	55	34	28	7	5	3	6	1	1	1	0	5	4	2	1	35	44							YDL068W	1.30926e-05	1.94317e-05	1.38874e-05	1.79719e-05	1.76541e-05	2.0851e-05	1.88354e-05	1.86171e-05	2.31066e-05	2.20417e-05
		YDL069C	0	0	0	0	0	0	0	0	0	0	0	0	0	0	0	0	0	0	0	0	0	0	0	0	0	0	0	0	0	0							YDL069C	0	0	0	0	0	0	0	0	0	0
		YDL070W	1279	1200	1187	1011	949	1251	1129	1236	1378	1491	1417	1410	1277	1379	1048	1039	1297	1423	1264	1416	1496	1822	1502	1637	1502	1099	794	844	670	840							YDL070W	0.000452578	0.000448423	0.000412109	0.000443161	0.000465381	0.000501626	0.000494538	0.000511348	0.000539677	0.000521654
		YDL071C	1266	1171	1240	972	894	994	963	1016	1215	1301	1176	1098	966	1160	926	868	1177	1151	1194	1243	1347	1649	1265	1278	880	837	486	472	673	816							YDL071C	0.000447978	0.000437586	0.00043051	0.000426066	0.000438409	0.000398574	0.000421825	0.000420332	0.00047584	0.000455179
		YDL072C	0	0	0	0	0	0	0	0	0	0	0	0	0	0	0	0	0	0	0	0	0	0	0	0	0	0	0	0	0	0							YDL072C	0	0	0	0	0	0	0	0	0	0
		YDL073W	0	0	0	0	0	0	0	0	0	0	0	0	0	0	0	0	0	0	0	0	0	0	0	0	0	0	0	0	0	0							YDL073W	0	0	0	0	0	0	0	0	0	0
		YDL074C	157	117	112	91	82	116	70	92	75	106	82	53	65	53	54	54	30	21	31	38	46	37	38	16	16	39	7	16	261	313							YDL074C	5.55549e-05	4.37212e-05	3.88848e-05	3.98889e-05	4.0212e-05	4.65137e-05	3.06622e-05	3.80615e-05	2.93729e-05	3.70861e-05
		YDL075W	269	229	167	115	87	122	55	69	49	63	25	46	31	29	68	74	90	83	119	121	106	148	167	202	175	185	190	156	471	570							YDL075W	9.51864e-05	8.5574e-05	5.798e-05	5.0409e-05	4.2664e-05	4.89195e-05	2.40918e-05	2.85461e-05	1.91903e-05	2.20417e-05
		YDL076C	0	1	0	0	0	0	0	0	0	0	0	0	0	0	0	0	0	0	0	0	0	0	0	0	0	0	0	0	1	0							YDL076C	0	3.73686e-07	0	0	0	0	0	0	0	0
		YDL077C	0	0	0	0	0	0	0	0	0	0	0	0	0	0	0	0	0	0	0	0	0	0	0	0	0	0	0	0	0	0							YDL077C	0	0	0	0	0	0	0	0	0	0
		YDL078C	1177	1101	1148	962	878	1087	947	983	1121	1209	1102	1130	1064	1134	990	938	1102	1111	987	1027	919	1154	619	648	494	421	204	268	607	767							YDL078C	0.000416485	0.000411428	0.000398569	0.000421682	0.000430563	0.000435865	0.000414816	0.000406679	0.000439026	0.000422991
		YDL079C	829	754	852	702	618	763	662	713	793	861	812	778	610	745	639	587	689	842	695	730	526	628	418	333	198	185	105	106	556	611							YDL079C	0.000293344	0.000281759	0.000295802	0.000307714	0.000303061	0.000305948	0.000289977	0.000294977	0.000310569	0.000301237
		YDL080C	83	118	148	115	100	142	125	133	69	126	116	104	76	84	105	94	79	135	122	100	97	66	191	40	546	644	769	847	31	25							YDL080C	2.93698e-05	4.40949e-05	5.13834e-05	5.0409e-05	4.90391e-05	5.69391e-05	5.4754e-05	5.50237e-05	2.7023e-05	4.40834e-05
		YDL081C	0	0	0	0	0	0	0	0	0	0	0	0	0	0	0	0	0	0	0	0	0	0	0	0	0	0	0	0	0	0							YDL081C	0	0	0	0	0	0	0	0	0	0
		YDL082W	716	659	613	517	389	482	345	397	296	379	315	276	226	255	362	322	492	579	754	734	723	855	925	754	613	491	237	217	616	731							YDL082W	0.000253359	0.000246259	0.000212825	0.000226621	0.000190762	0.000193272	0.000151121	0.000164244	0.000115925	0.0001326
		YDL083C	677	661	543	413	313	376	281	282	283	296	214	255	147	220	377	345	386	463	641	625	779	872	1458	1029	709	566	108	100	612	783							YDL083C	0.000239558	0.000247006	0.000188522	0.000181034	0.000153492	0.000150768	0.000123087	0.000116667	0.000110834	0.000103561
		YDL085C-A	0	0	0	0	0	0	0	0	0	0	0	0	0	0	0	0	0	0	0	0	0	0	0	0	0	0	0	0	0	0							YDL085C-A	0	0	0	0	0	0	0	0	0	0
		YDL085W	289	368	384	321	285	375	353	411	390	433	399	385	313	382	401	363	359	422	357	392	213	209	139	64	111	118	41	65	116	155							YDL085W	0.000102263	0.000137516	0.000133319	0.000140707	0.000139761	0.000150367	0.000154625	0.000170036	0.000152739	0.000151493
		YDL086W	1055	969	1125	823	753	906	930	928	1058	1097	1028	1007	860	1031	827	739	925	1113	744	879	765	890	527	441	317	264	185	220	590	744							YDL086W	0.000373315	0.000362102	0.000390584	0.000360753	0.000369264	0.000363288	0.00040737	0.000383925	0.000414353	0.000383806
		YDL088C	1095	958	1020	825	702	892	720	839	862	952	884	817	767	855	801	742	946	991	957	1061	1409	1875	1419	1232	914	768	436	426	665	811							YDL088C	0.000387469	0.000357991	0.000354129	0.00036163	0.000344254	0.000357674	0.000315383	0.000347105	0.000337592	0.000333075
		YDL089W	1096	1033	1146	892	767	1006	878	927	1013	1100	1035	934	944	1041	878	820	969	995	879	988	927	1078	704	632	462	406	281	232	580	720							YDL089W	0.000387823	0.000386017	0.000397874	0.000390999	0.00037613	0.000403386	0.000384592	0.000383511	0.000396729	0.000384855
		YDL090C	0	0	0	0	0	0	0	0	0	0	0	0	0	0	0	0	0	0	0	0	0	0	0	0	0	0	0	0	0	0							YDL090C	0	0	0	0	0	0	0	0	0	0
		YDL091C	996	985	980	838	773	954	850	870	919	1113	978	952	809	978	816	792	934	989	836	907	781	918	563	464	330	273	171	206	503	628							YDL091C	0.000352437	0.000368081	0.000340242	0.000367328	0.000379072	0.000382535	0.000372327	0.00035993	0.000359915	0.000389404
		YDL093W	2092	1945	2287	1780	1646	1935	1781	1929	2143	2334	2036	2165	1909	2138	1841	1680	2147	2180	1962	2128	1823	2109	1488	1262	1037	803	471	528	1205	1519							YDL093W	0.00074026	0.000726819	0.000794013	0.000780244	0.000807183	0.000775896	0.000780135	0.000798051	0.00083928	0.000816593
		YDL094C	45	55	104	62	56	72	83	68	72	108	83	82	85	75	56	48	67	74	64	66	36	28	10	3	12	15	7	8	16	17							YDL094C	1.59234e-05	2.05527e-05	3.61073e-05	2.7177e-05	2.74619e-05	2.88705e-05	3.63566e-05	2.81324e-05	2.81979e-05	3.77858e-05
		YDL095W	979	890	984	731	631	840	767	716	728	936	769	697	596	732	752	708	784	861	628	690	502	643	378	403	214	210	157	127	526	675							YDL095W	0.000346422	0.00033258	0.00034163	0.000320426	0.000309436	0.000336823	0.00033597	0.000296218	0.000285113	0.000327477
		YDL096C	1100	975	959	843	734	918	820	870	832	851	797	811	641	696	774	740	893	900	714	766	510	588	338	335	165	187	139	125	545	669							YDL096C	0.000389238	0.000364344	0.000332951	0.00036952	0.000359947	0.000368099	0.000359186	0.00035993	0.000325843	0.000297738
		YDL099W	895	909	880	691	664	781	653	746	735	773	693	699	635	717	678	671	838	777	756	766	689	833	696	600	555	458	283	328	644	896							YDL099W	0.000316698	0.00033968	0.000305523	0.000302892	0.000325619	0.000313165	0.000286035	0.000308629	0.000287854	0.000270448
		YDL100C	1	0	4	1	3	0	0	0	1	2	0	0	0	0	1	0	0	0	0	0	0	0	0	0	0	0	0	0	0	0							YDL100C	3.53853e-07	0	1.38874e-06	4.38339e-07	1.47117e-06	0	0	0	3.91638e-07	6.99737e-07
		YDL101C	752	679	760	637	590	666	664	651	630	735	667	638	492	615	560	500	624	772	591	659	594	727	456	422	306	247	166	187	528	673							YDL101C	0.000266097	0.000253733	0.000263861	0.000279222	0.00028933	0.000267053	0.000290853	0.000269327	0.000246732	0.000257153
		YDL104C	628	644	596	469	380	466	463	432	437	530	425	450	422	368	359	364	209	270	141	156	73	62	44	32	45	33	24	29	448	583							YDL104C	0.00022222	0.000240654	0.000206922	0.000205581	0.000186348	0.000186857	0.000202809	0.000178724	0.000171146	0.00018543
		YDL106C	0	0	0	0	0	0	0	0	0	0	0	0	0	0	0	0	0	0	0	0	0	0	0	0	0	0	0	0	0	0							YDL106C	0	0	0	0	0	0	0	0	0	0
		YDL107W	153	126	148	121	88	96	96	106	124	138	103	110	88	90	83	91	24	27	9	12	16	7	4	5	6	10	7	4	224	294							YDL107W	5.41395e-05	4.70844e-05	5.13834e-05	5.3039e-05	4.31544e-05	3.84941e-05	4.20511e-05	4.38535e-05	4.85631e-05	4.82818e-05
		YDL109C	974	835	919	768	654	753	765	774	807	995	878	860	738	780	682	596	817	812	654	730	617	707	421	407	269	224	185	154	531	635							YDL109C	0.000344653	0.000312028	0.000319063	0.000336645	0.000320715	0.000301938	0.000335094	0.000320213	0.000316052	0.000348119
		YDL110C	870	776	917	689	628	748	707	719	808	843	837	791	654	721	633	607	779	870	665	803	681	809	539	545	331	354	197	249	523	548							YDL110C	0.000307852	0.00028998	0.000318369	0.000302016	0.000307965	0.000299933	0.000309689	0.000297459	0.000316444	0.000294939
		YDL112W	0	0	0	0	0	0	0	0	0	0	0	0	0	0	0	0	0	0	0	0	0	0	0	0	0	0	0	0	0	0							YDL112W	0	0	0	0	0	0	0	0	0	0
		YDL113C	983	821	908	682	607	772	742	803	863	1005	841	801	721	783	755	612	794	918	729	740	648	857	636	599	440	366	221	241	545	575							YDL113C	0.000347837	0.000306796	0.000315244	0.000298947	0.000297667	0.000309556	0.00032502	0.000332211	0.000337984	0.000351618
		YDL114W	2	4	0	1	0	3	0	0	0	1	1	1	0	1	0	0	0	2	0	0	0	0	0	1	0	0	0	0	3	2							YDL114W	7.07706e-07	1.49474e-06	0	4.38339e-07	0	1.20294e-06	0	0	0	3.49868e-07
		YDL115C	0	0	2	0	0	1	0	0	0	0	0	1	0	0	0	0	0	1	3	0	0	0	0	1	0	0	0	0	0	1							YDL115C	0	0	6.94371e-07	0	0	4.0098e-07	0	0	0	0
		YDL116W	30	39	28	12	19	14	7	12	4	7	4	5	2	2	4	13	12	12	13	9	22	13	52	55	115	67	107	126	180	219							YDL116W	1.06156e-05	1.45737e-05	9.72119e-06	5.26007e-06	9.31742e-06	5.61372e-06	3.06622e-06	4.96455e-06	1.56655e-06	2.44908e-06
		YDL117W	1	1	11	9	3	1	6	3	4	7	4	4	1	3	1	5	0	4	0	0	0	3	1	2	0	0	1	0	2	2							YDL117W	3.53853e-07	3.73686e-07	3.81904e-06	3.94505e-06	1.47117e-06	4.0098e-07	2.62819e-06	1.24114e-06	1.56655e-06	2.44908e-06
		YDL118W	365	330	306	239	175	192	145	119	116	102	72	85	42	83	155	139	92	120	43	29	27	18	3	12	6	7	3	3	660	725							YDL118W	0.000129156	0.000123316	0.000106239	0.000104763	8.58183e-05	7.69881e-05	6.35146e-05	4.92318e-05	4.543e-05	3.56866e-05
		YDL119C	399	443	365	269	230	255	147	153	140	148	111	146	70	96	170	180	153	149	48	63	36	27	13	17	5	10	4	4	574	748							YDL119C	0.000141187	0.000165543	0.000126723	0.000117913	0.00011279	0.00010225	6.43907e-05	6.3298e-05	5.48293e-05	5.17805e-05
		YDL121C	959	921	949	818	663	821	737	756	852	958	887	907	745	810	732	637	901	915	759	885	736	878	479	482	366	287	202	205	532	676							YDL121C	0.000339345	0.000344165	0.000329479	0.000358562	0.000325129	0.000329204	0.000322829	0.000312766	0.000333676	0.000335174
		YDL122W	852	765	820	706	640	759	750	762	806	898	858	784	647	722	648	578	866	856	817	846	815	1068	967	914	780	705	489	508	604	750							YDL122W	0.000301483	0.00028587	0.000284692	0.000309468	0.00031385	0.000304344	0.000328524	0.000315249	0.00031566	0.000314182
		YDL123W	826	729	809	698	599	700	687	725	716	855	814	783	665	699	576	547	799	780	619	719	638	794	475	523	288	309	182	179	465	536							YDL123W	0.000292283	0.000272417	0.000280873	0.000305961	0.000293744	0.000280686	0.000300928	0.000299941	0.000280413	0.000299138
		YDL124W	869	834	984	747	659	902	762	766	845	976	890	836	821	910	648	758	873	928	752	849	683	825	465	487	309	278	182	202	628	750							YDL124W	0.000307498	0.000311654	0.00034163	0.000327439	0.000323167	0.000361684	0.00033378	0.000316904	0.000330934	0.000341472
		YDL125C	2	4	7	3	2	1	1	11	2	6	3	4	0	1	2	1	0	2	2	1	1	2	5	3	2	4	0	1	1	1							YDL125C	7.07706e-07	1.49474e-06	2.4303e-06	1.31502e-06	9.80781e-07	4.0098e-07	4.38032e-07	4.55083e-06	7.83276e-07	2.09921e-06
		YDL127W	0	1	9	4	4	8	2	1	4	6	2	6	1	1	2	1	0	1	1	3	2	0	0	0	0	0	0	0	0	1							YDL127W	0	3.73686e-07	3.12467e-06	1.75336e-06	1.96156e-06	3.20784e-06	8.76064e-07	4.13712e-07	1.56655e-06	2.09921e-06
		YDL128W	0	0	0	0	0	0	0	0	0	1	0	0	0	0	0	0	0	0	0	0	0	0	0	0	0	0	0	0	0	0							YDL128W	0	0	0	0	0	0	0	0	0	3.49868e-07
		YDL129W	0	0	1	0	0	0	0	0	0	1	0	1	0	0	0	0	0	0	0	0	0	0	0	0	0	0	0	0	0	0							YDL129W	0	0	3.47185e-07	0	0	0	0	0	0	3.49868e-07
		YDL130W	556	674	601	462	369	488	373	356	275	364	244	281	238	251	370	331	503	527	894	892	829	971	1508	490	1322	1297	777	750	343	357							YDL130W	0.000196742	0.000251864	0.000208658	0.000202513	0.000180954	0.000195678	0.000163386	0.000147282	0.0001077	0.000127352
		YDL130W-A	0	0	0	0	0	0	0	0	0	0	0	0	0	0	0	0	0	0	0	0	0	0	0	0	0	0	0	0	0	0							YDL130W-A	0	0	0	0	0	0	0	0	0	0
		YDL131W	911	895	867	734	682	819	797	767	853	921	897	820	727	931	745	723	841	885	786	761	692	812	495	449	358	297	198	213	615	715							YDL131W	0.00032236	0.000334449	0.00030101	0.000321741	0.000334446	0.000328402	0.000349111	0.000317317	0.000334067	0.000322229
		YDL133C-A	1055	1036	1050	833	726	863	825	955	900	1048	938	963	874	848	800	738	1003	1060	898	960	902	1083	705	641	457	310	271	216	577	687							YDL133C-A	0.000373315	0.000387138	0.000364545	0.000365137	0.000356024	0.000346046	0.000361376	0.000395095	0.000352474	0.000366662
		YDL133W	0	1	9	1	0	3	2	1	1	3	0	2	0	2	2	1	0	0	0	0	0	1	1	0	1	0	0	0	0	0							YDL133W	0	3.73686e-07	3.12467e-06	4.38339e-07	0	1.20294e-06	8.76064e-07	4.13712e-07	3.91638e-07	1.04961e-06
		YDL134C	393	374	359	327	328	353	374	357	394	454	429	428	340	392	309	246	379	382	351	305	435	558	762	703	919	815	714	771	522	569							YDL134C	0.000139064	0.000139758	0.00012464	0.000143337	0.000160848	0.000141546	0.000163824	0.000147695	0.000154305	0.00015884
		YDL134C-A	923	833	949	736	675	836	699	741	861	928	821	793	737	819	717	693	895	933	799	861	727	919	553	427	390	324	193	203	536	812							YDL134C-A	0.000326606	0.00031128	0.000329479	0.000322618	0.000331014	0.000335219	0.000306184	0.000306561	0.0003372	0.000324678
		YDL135C	0	0	0	0	0	0	0	0	0	0	0	0	0	0	0	0	0	0	0	0	0	0	0	0	0	0	0	0	0	0							YDL135C	0	0	0	0	0	0	0	0	0	0
		YDL136W	696	696	670	504	393	498	377	420	363	389	359	316	272	312	384	412	575	584	750	804	812	998	1158	943	941	752	418	450	678	733							YDL136W	0.000246282	0.000260085	0.000232614	0.000220923	0.000192723	0.000199688	0.000165138	0.000173759	0.000142165	0.000136099
		YDL137W	0	1	0	0	0	1	0	0	0	0	0	1	0	1	0	0	0	0	0	0	0	0	1	0	0	0	0	0	0	0							YDL137W	0	3.73686e-07	0	0	0	4.0098e-07	0	0	0	0
		YDL138W	8	12	19	22	16	20	12	23	9	19	9	8	11	14	12	7	10	9	19	19	11	6	31	9	122	106	143	174	2	0							YDL138W	2.83082e-06	4.48423e-06	6.59652e-06	9.64346e-06	7.84625e-06	8.0196e-06	5.25638e-06	9.51538e-06	3.52474e-06	6.6475e-06
		YDL142C	669	577	578	458	421	590	420	490	457	567	500	484	371	445	419	363	453	502	331	394	134	118	54	55	30	40	31	38	535	620							YDL142C	0.000236728	0.000215617	0.000200673	0.000200759	0.000206454	0.000236578	0.000183973	0.000202719	0.000178979	0.000198375
		YDL144C	1046	1004	1095	792	793	958	909	880	1005	1146	1043	1026	911	1064	955	866	1050	980	894	970	765	927	542	495	351	269	209	183	662	817							YDL144C	0.00037013	0.000375181	0.000380168	0.000347165	0.00038888	0.000384139	0.000398171	0.000364067	0.000393596	0.000400949
		YDL146W	1	5	7	7	2	8	9	6	5	14	5	3	2	10	3	3	2	4	6	3	2	1	1	0	3	1	0	0	1	3							YDL146W	3.53853e-07	1.86843e-06	2.4303e-06	3.06837e-06	9.80781e-07	3.20784e-06	3.94229e-06	2.48227e-06	1.95819e-06	4.89816e-06
		YDL149W	913	849	920	759	611	781	808	788	887	998	879	877	792	850	769	678	890	881	743	800	635	835	596	509	431	393	207	233	571	637							YDL149W	0.000323068	0.000317259	0.000319411	0.000332699	0.000299629	0.000313165	0.00035393	0.000326005	0.000347383	0.000349169
		YDL151C	4	4	11	7	8	6	5	7	5	9	1	3	6	1	4	2	3	5	4	4	12	5	2	1	4	9	1	5	6	8							YDL151C	1.41541e-06	1.49474e-06	3.81904e-06	3.06837e-06	3.92312e-06	2.40588e-06	2.19016e-06	2.89599e-06	1.95819e-06	3.14882e-06
		YDL154W	991	921	1035	765	653	878	802	804	859	1001	899	898	871	948	727	700	954	901	764	834	760	991	647	521	400	360	203	254	624	782							YDL154W	0.000350668	0.000344165	0.000359337	0.00033533	0.000320225	0.00035206	0.000351302	0.000332625	0.000336417	0.000350218
		YDL155W	820	762	820	657	613	787	661	746	765	871	776	841	633	726	718	653	710	749	626	650	738	898	761	670	488	495	306	333	628	692							YDL155W	0.000290159	0.000284749	0.000284692	0.000287989	0.000300609	0.000315571	0.000289539	0.000308629	0.000299603	0.000304735
		YDL156W	988	922	1090	836	744	933	739	852	982	1036	1012	976	857	945	827	701	847	839	760	728	706	817	521	515	412	383	249	263	702	987							YDL156W	0.000349607	0.000344538	0.000378432	0.000366452	0.000364851	0.000374114	0.000323706	0.000352483	0.000384589	0.000362464
		YDL157C	1	0	11	5	2	4	3	0	8	8	4	5	1	4	0	0	1	1	1	0	0	0	0	0	0	0	0	0	0	0							YDL157C	3.53853e-07	0	3.81904e-06	2.1917e-06	9.80781e-07	1.60392e-06	1.3141e-06	0	3.1331e-06	2.79895e-06
		YDL158C	0	0	1	0	0	0	0	0	0	0	0	0	0	0	0	0	0	0	0	0	0	0	0	0	0	0	0	0	0	0							YDL158C	0	0	3.47185e-07	0	0	0	0	0	0	0
		YDL159W	0	0	0	0	0	0	0	0	0	0	0	0	0	0	0	0	0	0	0	0	0	0	0	0	0	0	0	0	0	0							YDL159W	0	0	0	0	0	0	0	0	0	0
		YDL159W-A	0	0	0	0	0	0	0	0	0	0	0	0	0	0	0	0	0	0	0	0	0	0	0	0	0	0	0	0	0	0							YDL159W-A	0	0	0	0	0	0	0	0	0	0
		YDL160C	1	6	2	3	2	5	1	0	3	0	0	0	3	3	2	2	0	1	0	2	3	5	1	1	4	9	11	14	26	26							YDL160C	3.53853e-07	2.24211e-06	6.94371e-07	1.31502e-06	9.80781e-07	2.0049e-06	4.38032e-07	0	1.17491e-06	0
		YDL160C-A	0	0	0	0	0	0	0	0	0	0	0	0	0	0	0	0	0	0	0	0	0	0	0	0	0	0	0	0	0	0							YDL160C-A	0	0	0	0	0	0	0	0	0	0
		YDL161W	787	630	710	588	523	548	563	607	693	797	650	648	633	663	582	569	683	689	585	645	619	776	525	532	363	294	196	190	519	693							YDL161W	0.000278482	0.000235422	0.000246502	0.000257743	0.000256474	0.000219737	0.000246612	0.000251123	0.000271405	0.000278845
		YDL162C	377	386	431	350	293	423	376	360	347	516	480	398	377	439	321	324	347	372	367	360	277	299	218	114	157	163	110	99	235	253							YDL162C	0.000133403	0.000144243	0.000149637	0.000153419	0.000143684	0.000169614	0.0001647	0.000148936	0.000135898	0.000180532
		YDL167C	877	797	832	742	682	734	748	755	844	1034	805	875	704	825	661	675	826	829	671	784	690	884	1148	1144	1757	1481	1291	1340	547	618							YDL167C	0.000310329	0.000297828	0.000288858	0.000325248	0.000334446	0.000294319	0.000327648	0.000312353	0.000330543	0.000361764
		YDL168W	0	0	0	0	0	0	0	0	0	0	0	0	0	0	1	0	0	0	0	0	0	0	0	0	0	0	0	0	0	0							YDL168W	0	0	0	0	0	0	0	0	0	0
		YDL169C	918	839	974	710	667	812	741	786	848	881	912	855	740	758	701	677	889	880	698	804	677	798	556	619	353	319	194	211	561	750							YDL169C	0.000324837	0.000313522	0.000338159	0.000311221	0.00032709	0.000325596	0.000324582	0.000325178	0.000332109	0.000308234
		YDL170W	947	894	1076	758	709	849	845	858	876	989	885	887	724	852	727	665	807	868	707	772	680	766	502	383	369	324	204	260	510	623							YDL170W	0.000335099	0.000334075	0.000373571	0.000332261	0.000347687	0.000340432	0.000370137	0.000354965	0.000343075	0.00034602
		YDL171C	999	906	1085	806	702	918	829	930	939	1016	942	1005	872	982	829	752	979	1025	773	886	786	1026	688	576	567	427	282	274	673	824							YDL171C	0.000353499	0.000338559	0.000376696	0.000353301	0.000344254	0.000368099	0.000363128	0.000384752	0.000367748	0.000355466
		YDL172C	400	345	358	318	247	311	289	297	302	309	279	270	250	223	205	199	78	113	60	63	45	55	30	25	29	22	24	28	556	714							YDL172C	0.000141541	0.000128922	0.000124292	0.000139392	0.000121126	0.000124705	0.000126591	0.000122873	0.000118275	0.000108109
		YDL173W	332	334	360	291	268	295	256	293	271	319	264	230	201	234	209	177	96	107	66	51	32	25	34	15	17	21	7	14	565	706							YDL173W	0.000117479	0.000124811	0.000124987	0.000127557	0.000131425	0.000118289	0.000112136	0.000121218	0.000106134	0.000111608
		YDL174C	917	836	942	744	697	840	770	868	843	1019	854	913	779	905	688	682	841	934	811	886	800	984	670	654	469	374	201	236	534	631							YDL174C	0.000324483	0.000312401	0.000327049	0.000326124	0.000341802	0.000336823	0.000337285	0.000359102	0.000330151	0.000356516
		YDL175C	0	0	4	1	1	0	1	0	1	0	1	0	0	1	0	0	0	0	0	0	0	0	0	0	1	0	0	0	0	0							YDL175C	0	0	1.38874e-06	4.38339e-07	4.90391e-07	0	4.38032e-07	0	3.91638e-07	0
		YDL176W	958	856	927	735	658	846	750	821	903	1021	910	890	782	841	722	689	829	841	612	703	657	771	508	454	314	271	194	229	527	657							YDL176W	0.000338991	0.000319875	0.000321841	0.000322179	0.000322677	0.000339229	0.000328524	0.000339658	0.000353649	0.000357216
		YDL177C	813	759	866	691	619	780	702	719	741	879	743	757	687	748	627	560	736	793	661	737	575	720	428	420	359	272	187	187	532	631							YDL177C	0.000287682	0.000283628	0.000300662	0.000302892	0.000303552	0.000312764	0.000307498	0.000297459	0.000290204	0.000307534
		YDL178W	956	903	1015	779	787	842	808	831	866	1062	949	990	889	960	775	703	950	902	821	878	854	890	679	585	499	427	265	247	629	730							YDL178W	0.000338283	0.000337438	0.000352393	0.000341466	0.000385937	0.000337625	0.00035393	0.000343795	0.000339159	0.00037156
		YDL179W	888	844	1008	821	626	747	779	760	875	902	895	828	763	920	746	632	789	804	768	771	666	838	496	476	318	265	266	157	661	771							YDL179W	0.000314221	0.000315391	0.000349963	0.000359877	0.000306984	0.000299532	0.000341227	0.000314421	0.000342683	0.000315581
		YDL180W	949	815	883	758	734	863	731	787	940	1021	897	878	851	875	726	716	771	816	771	850	756	849	581	519	468	350	212	233	671	820							YDL180W	0.000335806	0.000304554	0.000306565	0.000332261	0.000359947	0.000346046	0.000320201	0.000325592	0.00036814	0.000357216
		YDL181W	930	931	1039	780	766	877	942	873	1031	1051	1056	971	919	972	887	804	1016	899	831	884	811	1006	587	583	453	329	222	199	796	877							YDL181W	0.000329083	0.000347901	0.000360726	0.000341905	0.000375639	0.000351659	0.000412626	0.000361171	0.000403779	0.000367712
		YDL182W	912	853	828	673	539	676	507	553	509	627	540	464	402	455	622	523	880	920	1120	1096	1076	1508	1330	1219	1108	959	601	577	700	717							YDL182W	0.000322714	0.000318754	0.000287469	0.000295002	0.000264321	0.000271062	0.000222082	0.000228783	0.000199344	0.000219368
		YDL183C	792	766	866	660	608	783	747	711	698	878	836	789	728	800	687	578	633	644	471	545	450	571	455	310	390	321	202	184	580	621							YDL183C	0.000280252	0.000286243	0.000300662	0.000289304	0.000298157	0.000313967	0.00032721	0.000294149	0.000273363	0.000307185
		YDL184C	831	723	788	631	556	685	653	714	736	796	776	693	709	647	666	596	788	840	668	765	746	889	604	356	310	280	117	165	532	729							YDL184C	0.000294052	0.000270175	0.000273582	0.000276592	0.000272657	0.000274671	0.000286035	0.000295391	0.000288246	0.000278495
		YDL185W	0	0	0	0	0	0	0	0	0	0	0	0	0	0	0	0	0	0	0	0	0	0	0	0	0	0	0	0	0	0							YDL185W	0	0	0	0	0	0	0	0	0	0
		YDL186W	899	826	973	701	678	857	787	817	897	927	943	910	768	858	746	673	914	832	766	805	727	808	517	381	334	290	163	184	647	794							YDL186W	0.000318114	0.000308664	0.000337811	0.000307276	0.000332485	0.00034364	0.000344731	0.000338003	0.000351299	0.000324328
		YDL187C	1001	896	984	792	724	940	821	898	1021	1048	1003	988	898	926	816	712	940	896	822	935	829	995	634	582	408	414	246	256	605	735							YDL187C	0.000354207	0.000334822	0.00034163	0.000347165	0.000355043	0.000376921	0.000359624	0.000371514	0.000399862	0.000366662
		YDL188C	833	818	931	771	645	819	728	838	855	965	897	898	732	820	712	627	791	884	882	926	952	1226	1088	900	1058	961	787	627	617	745							YDL188C	0.000294759	0.000305675	0.00032323	0.00033796	0.000316302	0.000328402	0.000318887	0.000346691	0.000334851	0.000337623
		YDL189W	814	763	898	708	604	716	697	678	762	768	809	737	713	721	582	614	765	783	704	700	536	660	415	395	297	234	163	120	646	828							YDL189W	0.000288036	0.000285122	0.000311772	0.000310344	0.000296196	0.000287102	0.000305308	0.000280497	0.000298428	0.000268699
		YDL190C	85	154	188	141	161	205	184	194	137	249	190	203	163	182	153	124	111	197	173	172	77	76	54	15	74	69	35	44	22	26							YDL190C	3.00775e-05	5.75476e-05	6.52708e-05	6.18058e-05	7.89529e-05	8.22009e-05	8.05979e-05	8.02602e-05	5.36544e-05	8.71172e-05
		YDL191W	659	708	581	450	350	487	342	350	337	351	327	292	230	266	349	346	460	496	556	606	542	598	436	330	154	132	52	59	494	678							YDL191W	0.000233189	0.00026457	0.000201715	0.000197253	0.000171637	0.000195277	0.000149807	0.000144799	0.000131982	0.000122804
		YDL192W	718	575	672	500	346	493	368	349	334	417	328	314	249	286	429	437	483	528	398	453	438	575	480	430	476	399	402	361	541	587							YDL192W	0.000254066	0.000214869	0.000233309	0.00021917	0.000169675	0.000197683	0.000161196	0.000144386	0.000130807	0.000145895
		YDL194W	1198	1117	1029	932	859	1044	988	1093	1173	1232	1192	1134	909	1125	975	1040	3580	3498	4711	4952	3187	4262	3174	3070	2816	2364	1370	1555	449	507							YDL194W	0.000423916	0.000417407	0.000357254	0.000408532	0.000421245	0.000418623	0.000432775	0.000452187	0.000459391	0.000431038
		YDL197C	0	3	8	2	4	5	4	6	0	3	3	2	0	0	1	0	0	0	0	0	0	0	0	0	0	0	0	0	0	1							YDL197C	0	1.12106e-06	2.77748e-06	8.76679e-07	1.96156e-06	2.0049e-06	1.75213e-06	2.48227e-06	0	1.04961e-06
		YDL198C	0	0	0	0	0	0	0	0	0	0	0	0	0	0	0	0	0	0	0	0	0	0	0	0	0	0	0	0	0	0							YDL198C	0	0	0	0	0	0	0	0	0	0
		YDL199C	861	846	927	800	631	812	688	720	826	843	825	725	716	691	684	663	728	710	541	633	483	594	306	283	199	167	94	120	723	866							YDL199C	0.000304667	0.000316138	0.000321841	0.000350671	0.000309436	0.000325596	0.000301366	0.000297873	0.000323493	0.000294939
		YDL200C	1049	970	1018	807	739	911	890	869	947	1038	949	1040	902	927	799	765	922	964	824	915	810	893	474	467	270	317	159	186	627	708							YDL200C	0.000371192	0.000362475	0.000353435	0.00035374	0.000362399	0.000365293	0.000389848	0.000359516	0.000370881	0.000363163
		YDL201W	906	870	969	731	659	802	747	701	756	886	768	804	668	762	671	663	457	556	138	120	110	93	103	71	78	67	54	58	587	619							YDL201W	0.000320591	0.000325107	0.000336423	0.000320426	0.000323167	0.000321586	0.00032721	0.000290012	0.000296078	0.000309983
		YDL202W	311	285	283	219	216	238	192	245	189	234	202	171	182	171	174	163	54	21	28	26	14	14	13	9	11	13	7	13	437	551							YDL202W	0.000110048	0.0001065	9.82534e-05	9.59963e-05	0.000105924	9.54332e-05	8.41021e-05	0.000101359	7.40196e-05	8.18692e-05
		YDL203C	989	1027	1113	867	825	973	886	949	996	1130	989	965	894	1019	822	732	1010	1030	906	968	914	1163	713	776	534	524	287	296	636	745							YDL203C	0.000349961	0.000383775	0.000386417	0.00038004	0.000404572	0.000390153	0.000388096	0.000392613	0.000390072	0.000395351
		YDL204W	978	907	1034	843	730	848	882	861	891	1007	1038	844	776	936	854	705	896	973	819	929	773	950	761	690	714	610	365	520	546	762							YDL204W	0.000346068	0.000338933	0.00035899	0.00036952	0.000357985	0.000340031	0.000386344	0.000356206	0.00034895	0.000352318
		YDL206W	881	736	860	675	626	739	726	783	818	827	830	774	698	774	660	641	768	790	644	741	664	768	532	452	292	293	167	128	566	645							YDL206W	0.000311744	0.000275033	0.000298579	0.000295879	0.000306984	0.000296324	0.000318011	0.000323937	0.00032036	0.000289341
		YDL210W	749	630	697	557	462	595	552	522	658	675	663	602	561	660	514	460	630	681	572	637	601	722	454	551	276	260	175	146	397	555							YDL210W	0.000265036	0.000235422	0.000241988	0.000244155	0.00022656	0.000238583	0.000241794	0.000215958	0.000257698	0.000236161
		YDL211C	1130	1108	1129	950	784	992	886	943	1086	1147	1126	1134	886	1035	876	871	1057	1039	860	993	825	986	577	527	365	322	188	210	751	821							YDL211C	0.000399854	0.000414044	0.000391972	0.000416422	0.000384466	0.000397772	0.000388096	0.000390131	0.000425319	0.000401299
		YDL213C	0	0	0	0	0	0	0	0	0	0	0	0	0	0	0	0	0	0	0	0	0	0	0	0	0	0	0	0	0	0							YDL213C	0	0	0	0	0	0	0	0	0	0
		YDL214C	0	0	2	1	1	1	0	1	3	2	1	3	0	3	0	0	0	0	1	1	0	0	0	0	0	0	0	0	0	0							YDL214C	0	0	6.94371e-07	4.38339e-07	4.90391e-07	4.0098e-07	0	4.13712e-07	1.17491e-06	6.99737e-07
		YDL215C	924	860	1026	776	730	956	791	899	808	1047	856	907	759	851	757	677	904	959	791	914	727	938	597	540	398	361	272	252	584	660							YDL215C	0.00032696	0.00032137	0.000356212	0.000340151	0.000357985	0.000383337	0.000346483	0.000371927	0.000316444	0.000366312
		YDL216C	971	929	985	765	722	939	829	879	934	1028	975	877	897	933	745	668	935	921	920	977	854	1177	758	719	496	484	349	316	521	659							YDL216C	0.000343591	0.000347154	0.000341978	0.00033533	0.000354062	0.00037652	0.000363128	0.000363653	0.00036579	0.000359665
		YDL218W	1048	865	1026	737	734	871	776	849	852	1016	911	910	737	970	765	700	914	985	747	859	804	970	620	675	423	409	260	258	607	723							YDL218W	0.000370838	0.000323238	0.000356212	0.000323056	0.000359947	0.000349253	0.000339913	0.000351242	0.000333676	0.000355466
		YDL219W	833	880	965	750	720	812	731	847	793	1015	959	906	789	868	746	674	869	935	789	847	645	729	539	313	332	338	166	184	458	451							YDL219W	0.000294759	0.000328843	0.000335034	0.000328754	0.000353081	0.000325596	0.000320201	0.000350414	0.000310569	0.000355116
		YDL222C	913	892	1030	801	674	847	838	850	826	971	958	833	803	907	771	661	893	934	814	862	777	882	559	517	343	315	206	190	592	729							YDL222C	0.000323068	0.000333328	0.000357601	0.00035111	0.000330523	0.00033963	0.000367071	0.000351655	0.000323493	0.000339722
		YDL223C	334	421	487	430	346	480	464	476	367	616	480	484	455	457	453	339	391	439	369	391	210	183	147	25	97	115	41	68	133	106							YDL223C	0.000118187	0.000157322	0.000169079	0.000188486	0.000169675	0.00019247	0.000203247	0.000196927	0.000143731	0.000215519
		YDL224C	809	736	759	613	543	647	572	621	698	728	693	685	601	662	544	565	634	693	468	554	343	461	278	237	142	123	78	56	584	813							YDL224C	0.000286267	0.000275033	0.000263514	0.000268702	0.000266282	0.000259434	0.000250554	0.000256915	0.000273363	0.000254704
		YDL225W	0	0	0	0	0	0	1	0	1	0	0	0	0	0	0	0	0	0	0	0	0	0	0	0	1	1	0	0	0	0							YDL225W	0	0	0	0	0	0	4.38032e-07	0	3.91638e-07	0
		YDL226C	9	8	9	5	3	12	9	4	6	15	4	10	4	8	3	10	8	4	1	1	3	3	4	4	0	0	0	2	7	29							YDL226C	3.18468e-06	2.98949e-06	3.12467e-06	2.1917e-06	1.47117e-06	4.81176e-06	3.94229e-06	1.65485e-06	2.34983e-06	5.24803e-06
		YDL227C	950	897	931	746	699	815	778	835	967	974	898	907	822	892	796	687	829	898	808	845	725	996	635	530	503	325	278	245	660	806							YDL227C	0.00033616	0.000335196	0.00032323	0.000327001	0.000342783	0.000326799	0.000340789	0.00034545	0.000378714	0.000340772
		YDL229W	904	907	923	691	604	792	692	741	771	853	791	775	692	698	722	667	1173	1228	1522	1592	1533	1736	995	929	392	354	166	156	494	631							YDL229W	0.000319883	0.000338933	0.000320452	0.000302892	0.000296196	0.000317576	0.000303118	0.000306561	0.000301953	0.000298438
		YDL230W	1117	987	1115	901	828	943	935	866	987	1121	1102	1082	921	894	755	770	1049	1110	968	996	950	1087	772	712	543	394	260	240	583	669							YDL230W	0.000395254	0.000368828	0.000387112	0.000394944	0.000406043	0.000378124	0.00040956	0.000358275	0.000386547	0.000392203
		YDL231C	1030	865	968	770	720	915	738	851	902	1031	922	947	842	893	761	667	915	944	806	874	817	1006	747	666	462	450	232	234	576	687							YDL231C	0.000364468	0.000323238	0.000336075	0.000337521	0.000353081	0.000366897	0.000323268	0.000352069	0.000353258	0.000360714
		YDL232W	0	0	0	0	0	1	0	0	0	0	0	0	0	0	0	0	0	0	0	0	0	0	0	0	0	0	0	0	0	0							YDL232W	0	0	0	0	0	4.0098e-07	0	0	0	0
		YDL233W	965	853	969	771	720	853	787	791	858	915	961	857	759	872	685	640	899	881	766	876	794	829	577	563	376	262	208	199	575	776							YDL233W	0.000341468	0.000318754	0.000336423	0.00033796	0.000353081	0.000342036	0.000344731	0.000327246	0.000336025	0.00032013
		YDL234C	811	779	862	652	558	668	638	696	716	829	738	750	639	651	647	579	739	821	618	728	571	718	451	337	287	238	147	123	488	544							YDL234C	0.000286975	0.000291101	0.000299274	0.000285797	0.000273638	0.000267855	0.000279464	0.000287944	0.000280413	0.000290041
		YDL236W	973	874	997	819	702	879	877	908	972	1022	1000	953	860	858	791	734	1016	1024	986	1067	1187	1484	1161	1095	837	718	505	547	576	625							YDL236W	0.000344299	0.000326601	0.000346144	0.000359	0.000344254	0.000352461	0.000384154	0.000375651	0.000380672	0.000357566
		YDL237W	0	0	1	0	0	0	0	0	0	0	0	0	0	1	0	0	0	0	0	0	0	0	0	0	0	0	0	0	0	0							YDL237W	0	0	3.47185e-07	0	0	0	0	0	0	0
		YDL238C	816	831	910	748	675	813	707	743	738	869	791	811	707	870	653	657	818	768	602	661	553	611	357	284	229	204	116	139	580	640							YDL238C	0.000288744	0.000310533	0.000315939	0.000327878	0.000331014	0.000325997	0.000309689	0.000307388	0.000289029	0.000304036
		YDL239C	953	920	1115	785	712	938	859	925	978	1055	944	925	810	961	837	772	971	997	928	927	702	936	562	579	371	351	193	198	719	840							YDL239C	0.000337222	0.000343791	0.000387112	0.000344096	0.000349158	0.000376119	0.000376269	0.000382684	0.000383022	0.000369111
		YDL240W	559	574	589	460	387	527	437	485	440	568	522	483	422	505	390	369	434	441	301	327	248	250	184	117	133	196	77	104	420	390							YDL240W	0.000197804	0.000214496	0.000204492	0.000201636	0.000189781	0.000211316	0.00019142	0.00020065	0.000172321	0.000198725
		YDL241W	913	912	958	797	725	939	794	829	849	996	934	950	809	891	828	737	972	1011	930	933	786	981	552	592	443	336	196	208	624	827							YDL241W	0.000323068	0.000340801	0.000332604	0.000349356	0.000355533	0.00037652	0.000347797	0.000342967	0.000332501	0.000348469
		YDL242W	0	0	0	0	0	0	0	0	0	0	0	0	0	0	0	0	0	0	0	0	0	0	0	0	0	0	0	0	0	0							YDL242W	0	0	0	0	0	0	0	0	0	0
		YDL243C	751	627	697	499	470	554	531	515	638	667	696	617	511	605	475	502	624	602	505	506	501	735	413	485	250	234	176	160	477	519							YDL243C	0.000265744	0.000234301	0.000241988	0.000218731	0.000230484	0.000222143	0.000232595	0.000213062	0.000249865	0.000233362
		YDR001C	919	864	864	742	695	808	748	831	970	930	835	873	808	879	772	674	939	943	887	925	737	840	582	581	332	306	221	214	538	721							YDR001C	0.000325191	0.000322865	0.000299968	0.000325248	0.000340821	0.000323992	0.000327648	0.000343795	0.000379889	0.000325378
		YDR003W	64	68	73	53	61	60	57	75	71	87	73	56	62	65	68	55	72	66	59	59	71	68	56	34	25	18	9	23	42	46							YDR003W	2.26466e-05	2.54106e-05	2.53445e-05	2.3232e-05	2.99138e-05	2.40588e-05	2.49678e-05	3.10284e-05	2.78063e-05	3.04386e-05
		YDR003W-A	0	0	0	0	0	0	0	0	0	0	0	0	0	0	0	0	0	0	0	0	0	0	0	0	0	0	0	0	0	0							YDR003W-A	0	0	0	0	0	0	0	0	0	0
		YDR004W	681	683	630	535	410	506	469	513	542	538	410	410	349	358	478	398	443	443	389	367	326	451	422	387	616	453	612	492	531	582							YDR004W	0.000240974	0.000255227	0.000218727	0.000234512	0.00020106	0.000202896	0.000205437	0.000212234	0.000212268	0.000188229
		YDR005C	316	366	327	308	314	369	361	359	400	453	377	408	323	366	292	325	166	197	70	96	72	74	82	32	88	91	64	75	182	208							YDR005C	0.000111818	0.000136769	0.00011353	0.000135008	0.000153983	0.000147962	0.000158129	0.000148523	0.000156655	0.00015849
		YDR006C	285	278	247	195	193	207	225	246	254	306	216	232	254	222	158	155	76	79	52	62	61	58	44	40	41	34	22	26	492	548							YDR006C	0.000100848	0.000103885	8.57548e-05	8.54762e-05	9.46454e-05	8.30028e-05	9.85572e-05	0.000101773	9.94761e-05	0.00010706
		YDR007W	1497	1406	1568	1276	1124	1351	1222	1278	1354	1590	1276	1286	869	1101	1210	1177	1292	1441	1551	1606	1284	1617	787	804	468	436	242	225	671	813							YDR007W	0.000529718	0.000525402	0.000544387	0.000559321	0.000551199	0.000541724	0.000535275	0.000528724	0.000530278	0.000556291
		YDR008C	773	813	766	647	560	731	591	666	699	683	652	589	455	507	541	590	357	378	234	245	114	108	74	40	58	59	37	39	775	983							YDR008C	0.000273528	0.000303807	0.000265944	0.000283605	0.000274619	0.000293116	0.000258877	0.000275532	0.000273755	0.00023896
		YDR009W	1092	925	1118	863	788	937	833	903	1055	1036	979	1064	900	981	769	749	1011	1049	901	968	765	932	587	528	352	338	160	208	615	684							YDR009W	0.000386407	0.000345659	0.000388153	0.000378287	0.000386428	0.000375718	0.000364881	0.000373582	0.000413178	0.000362464
		YDR010C	1006	933	940	761	661	852	728	848	923	1001	947	898	826	984	775	695	844	932	746	816	743	896	588	512	329	347	227	151	570	708							YDR010C	0.000355976	0.000348649	0.000326354	0.000333576	0.000324148	0.000341635	0.000318887	0.000350828	0.000361482	0.000350218
		YDR011W	1058	970	1043	750	791	913	872	863	970	1016	970	961	854	991	845	763	832	835	784	858	715	822	545	538	346	305	177	147	652	737							YDR011W	0.000374376	0.000362475	0.000362114	0.000328754	0.000387899	0.000366095	0.000381964	0.000357034	0.000379889	0.000355466
		YDR014W	912	882	948	758	797	892	806	837	868	1023	944	888	750	867	735	692	807	944	781	853	844	982	883	794	714	589	487	472	576	685							YDR014W	0.000322714	0.000329591	0.000329132	0.000332261	0.000390841	0.000357674	0.000353054	0.000346277	0.000339942	0.000357915
		YDR015C	1018	960	1001	823	748	884	845	946	944	1021	909	1012	794	939	868	804	990	1020	886	945	737	1004	498	606	380	426	203	349	575	723							YDR015C	0.000360222	0.000358738	0.000347533	0.000360753	0.000366812	0.000354466	0.000370137	0.000391372	0.000369706	0.000357216
		YDR017C	0	0	0	0	0	0	0	0	0	0	0	0	0	0	0	0	0	0	0	0	0	0	0	0	0	0	0	0	0	0							YDR017C	0	0	0	0	0	0	0	0	0	0
		YDR018C	1153	1021	1135	873	854	944	931	1038	1115	1201	1083	1087	903	1065	978	853	1005	1031	877	926	846	1006	687	587	443	377	189	217	635	789							YDR018C	0.000407992	0.000381533	0.000394055	0.00038267	0.000418794	0.000378525	0.000407808	0.000429433	0.000436676	0.000420192
		YDR019C	0	0	0	0	0	0	0	0	0	0	0	0	0	0	0	0	0	0	0	0	0	0	0	0	0	0	0	0	0	0							YDR019C	0	0	0	0	0	0	0	0	0	0
		YDR020C	309	319	363	326	306	376	323	372	387	413	373	352	334	391	357	359	395	458	415	427	313	355	263	71	205	171	109	97	179	194							YDR020C	0.000109341	0.000119206	0.000126028	0.000142899	0.00015006	0.000150768	0.000141484	0.000153901	0.000151564	0.000144496
		YDR022C	912	932	900	794	657	855	735	823	872	1039	890	932	779	840	700	687	846	824	654	668	627	790	561	501	386	324	191	227	596	627							YDR022C	0.000322714	0.000348275	0.000312467	0.000348041	0.000322187	0.000342838	0.000321953	0.000340485	0.000341508	0.000363513
		YDR024W	0	0	0	0	0	0	0	0	0	0	0	0	0	0	0	0	0	0	0	0	0	0	0	0	0	0	0	0	0	0							YDR024W	0	0	0	0	0	0	0	0	0	0
		YDR025W	219	223	219	139	87	110	83	95	68	91	63	63	34	51	95	108	102	109	162	177	142	125	236	74	156	148	22	36	134	146							YDR025W	7.74938e-05	8.33319e-05	7.60336e-05	6.09292e-05	4.2664e-05	4.41078e-05	3.63566e-05	3.93027e-05	2.66314e-05	3.1838e-05
		YDR026C	950	971	977	834	754	885	796	912	917	999	977	897	773	924	774	681	921	944	845	886	805	966	675	610	418	373	266	298	637	796							YDR026C	0.00033616	0.000362849	0.0003392	0.000365575	0.000369754	0.000354867	0.000348673	0.000377306	0.000359132	0.000349519
		YDR027C	70	49	37	27	19	23	32	31	19	26	17	40	12	16	23	20	5	13	11	15	6	24	7	2	1	3	3	3	109	150							YDR027C	2.47697e-05	1.83106e-05	1.28459e-05	1.18352e-05	9.31742e-06	9.22254e-06	1.4017e-05	1.28251e-05	7.44112e-06	9.09658e-06
		YDR028C	0	0	0	0	0	0	0	0	0	0	0	0	0	0	0	0	0	0	0	0	0	0	0	0	0	0	0	0	0	0							YDR028C	0	0	0	0	0	0	0	0	0	0
		YDR029W	910	898	958	785	693	866	851	849	1001	1119	951	1007	845	1009	890	769	982	957	1006	1113	1038	1132	949	823	840	705	489	557	617	814							YDR029W	0.000322006	0.00033557	0.000332604	0.000344096	0.000339841	0.000347249	0.000372765	0.000351242	0.00039203	0.000391503
		YDR030C	983	828	885	678	615	780	795	850	887	972	938	843	744	817	666	669	811	801	785	760	735	893	615	624	392	364	215	237	474	592							YDR030C	0.000347837	0.000309412	0.000307259	0.000297194	0.00030159	0.000312764	0.000348235	0.000351655	0.000347383	0.000340072
		YDR031W	1064	999	1017	793	746	914	843	932	966	1116	893	884	778	932	763	754	930	936	828	920	791	979	585	603	331	294	177	202	567	687							YDR031W	0.000376499	0.000373312	0.000353087	0.000347603	0.000365831	0.000366496	0.000369261	0.00038558	0.000378322	0.000390453
		YDR032C	1	0	4	0	0	0	0	0	2	3	0	0	0	0	0	0	0	1	1	0	0	0	0	0	0	0	0	0	0	0							YDR032C	3.53853e-07	0	1.38874e-06	0	0	0	0	0	7.83276e-07	1.04961e-06
		YDR033W	1177	1058	1135	868	832	1077	998	1022	1100	1354	1190	1130	1051	1046	913	865	1134	1228	1072	1080	973	1320	759	774	423	402	223	220	549	658							YDR033W	0.000416485	0.00039536	0.000394055	0.000380478	0.000408005	0.000431855	0.000437156	0.000422814	0.000430802	0.000473722
		YDR034C	130	136	116	84	48	68	48	34	28	32	34	21	7	13	57	47	63	41	89	80	107	120	245	114	441	431	477	481	292	335							YDR034C	4.60009e-05	5.08213e-05	4.02735e-05	3.68205e-05	2.35387e-05	2.72666e-05	2.10255e-05	1.40662e-05	1.09659e-05	1.11958e-05
		YDR034W-B	0	0	0	0	0	0	0	0	0	0	0	0	0	0	0	0	0	0	0	0	0	0	0	0	0	0	0	0	0	0							YDR034W-B	0	0	0	0	0	0	0	0	0	0
		YDR035W	1520	1568	1612	1257	1190	1447	1355	1478	1597	1638	1543	1617	1384	1594	1297	1169	1541	1586	1336	1477	1293	1607	1003	922	641	597	368	359	904	1108							YDR035W	0.000537856	0.000585939	0.000559663	0.000550992	0.000583565	0.000580218	0.000593533	0.000611467	0.000625446	0.000573085
		YDR036C	967	911	882	753	691	764	754	798	835	901	907	847	696	838	804	664	831	923	684	775	754	951	1068	775	916	808	591	699	543	662							YDR036C	0.000342176	0.000340428	0.000306217	0.000330069	0.00033886	0.000306349	0.000330276	0.000330142	0.000327018	0.000315231
		YDR042C	0	0	0	0	0	0	0	0	0	0	0	0	0	0	0	0	0	0	0	0	0	0	0	0	0	0	0	0	0	0							YDR042C	0	0	0	0	0	0	0	0	0	0
		YDR043C	0	0	0	0	0	0	0	0	0	0	0	0	0	0	0	0	0	0	0	0	0	0	0	0	0	0	0	0	0	0							YDR043C	0	0	0	0	0	0	0	0	0	0
		YDR046C	1009	930	1020	837	735	895	841	845	979	1044	966	998	874	920	756	711	927	1019	847	966	748	946	599	547	464	393	185	212	545	566							YDR046C	0.000357038	0.000347528	0.000354129	0.00036689	0.000360437	0.000358877	0.000368385	0.000349587	0.000383414	0.000365263
		YDR048C	52	53	38	38	38	36	36	39	45	53	49	66	28	56	47	51	40	51	22	29	32	50	35	16	8	21	5	3	62	84							YDR048C	1.84004e-05	1.98053e-05	1.3193e-05	1.66569e-05	1.86348e-05	1.44353e-05	1.57691e-05	1.61348e-05	1.76237e-05	1.8543e-05
		YDR049W	464	404	429	385	325	410	343	383	418	400	396	398	346	375	358	330	335	350	301	285	219	316	184	162	89	83	37	44	326	423							YDR049W	0.000164188	0.000150969	0.000148943	0.000168761	0.000159377	0.000164402	0.000150245	0.000158452	0.000163705	0.000139947
		YDR051C	888	769	845	745	722	838	702	821	847	943	819	923	796	820	753	707	755	875	871	1038	877	1038	589	565	382	331	233	263	558	802							YDR051C	0.000314221	0.000287364	0.000293372	0.000326563	0.000354062	0.000336021	0.000307498	0.000339658	0.000331717	0.000329926
		YDR055W	813	875	959	728	711	898	752	839	819	1043	920	901	840	897	752	715	852	885	834	931	647	743	458	259	332	298	138	185	407	411							YDR055W	0.000287682	0.000326975	0.000332951	0.000319111	0.000348668	0.00036008	0.0003294	0.000347105	0.000320752	0.000364913
		YDR056C	960	888	905	732	666	859	784	857	869	1002	956	882	803	963	724	694	840	924	781	873	690	966	607	601	375	362	209	231	599	696							YDR056C	0.000339699	0.000331833	0.000314203	0.000320864	0.0003266	0.000344442	0.000343417	0.000354551	0.000340333	0.000350568
		YDR057W	763	793	778	642	591	751	706	775	707	922	755	782	733	786	695	632	770	800	790	827	687	862	523	339	369	319	171	226	493	510							YDR057W	0.00026999	0.000296333	0.00027011	0.000281414	0.000289821	0.000301136	0.00030925	0.000320627	0.000276888	0.000322579
		YDR058C	1075	992	1110	831	757	962	891	974	1038	1205	1031	1022	898	962	847	741	939	1046	765	765	418	527	253	205	117	104	79	108	600	670							YDR058C	0.000380392	0.000370696	0.000385376	0.00036426	0.000371226	0.000385743	0.000390286	0.000402956	0.00040652	0.000421592
		YDR059C	882	807	879	691	665	830	745	800	809	937	885	780	731	840	755	667	828	821	789	863	659	841	448	441	334	303	166	199	599	796							YDR059C	0.000312098	0.000301564	0.000305176	0.000302892	0.00032611	0.000332813	0.000326334	0.00033097	0.000316835	0.000327827
		YDR061W	4	5	2	0	2	2	2	0	2	4	3	5	1	2	3	1	4	2	2	3	2	3	4	7	1	1	1	2	2	0							YDR061W	1.41541e-06	1.86843e-06	6.94371e-07	0	9.80781e-07	8.0196e-07	8.76064e-07	0	7.83276e-07	1.39947e-06
		YDR063W	598	649	755	580	561	672	617	629	667	771	649	778	630	704	593	568	659	752	536	593	378	330	168	41	130	78	62	63	427	460							YDR063W	0.000211604	0.000242522	0.000262125	0.000254237	0.000275109	0.000269458	0.000270266	0.000260225	0.000261223	0.000269749
		YDR065W	4	0	0	0	2	2	0	1	0	0	0	0	0	0	0	0	0	0	0	0	1	0	0	0	0	0	0	0	15	38							YDR065W	1.41541e-06	0	0	0	9.80781e-07	8.0196e-07	0	4.13712e-07	0	0
		YDR066C	876	835	878	769	672	766	699	785	875	891	890	882	758	767	764	643	847	874	721	788	736	825	476	487	383	269	180	182	574	707							YDR066C	0.000309975	0.000312028	0.000304829	0.000337083	0.000329542	0.000307151	0.000306184	0.000324764	0.000342683	0.000311733
		YDR067C	837	726	712	648	545	688	611	646	658	722	733	603	537	612	616	546	695	783	785	750	632	787	329	283	154	119	49	63	590	739							YDR067C	0.000296175	0.000271296	0.000247196	0.000284044	0.000267263	0.000275874	0.000267637	0.000267258	0.000257698	0.000252605
		YDR068W	848	787	756	680	677	735	688	777	829	868	808	813	716	783	702	638	785	770	698	726	628	778	568	487	381	349	244	223	693	801							YDR068W	0.000300067	0.000294091	0.000262472	0.000298071	0.000331994	0.00029472	0.000301366	0.000321454	0.000324668	0.000303686
		YDR069C	0	0	1	0	1	0	0	0	0	0	0	0	0	0	0	0	0	0	0	0	0	0	0	0	0	0	0	0	0	0							YDR069C	0	0	3.47185e-07	0	4.90391e-07	0	0	0	0	0
		YDR070C	786	751	797	664	602	702	659	684	742	833	717	712	665	739	624	588	683	783	704	774	601	713	458	307	379	282	179	176	453	570							YDR070C	0.000278128	0.000280638	0.000276707	0.000291057	0.000295215	0.000281488	0.000288663	0.000282979	0.000290595	0.00029144
		YDR071C	1249	1240	1231	1008	896	1051	1063	991	1249	1328	1233	1199	1061	1123	984	913	1023	1043	1065	1188	1214	1528	1110	1089	778	715	581	529	736	925							YDR071C	0.000441962	0.00046337	0.000427385	0.000441846	0.00043939	0.00042143	0.000465628	0.000409989	0.000489156	0.000464625
		YDR072C	786	710	634	565	544	619	567	632	678	672	621	670	499	603	517	437	349	337	360	371	154	157	81	78	55	35	27	30	691	912							YDR072C	0.000278128	0.000265317	0.000220116	0.000247662	0.000266772	0.000248207	0.000248364	0.000261466	0.000265531	0.000235112
		YDR073W	842	777	840	622	565	706	642	652	750	785	760	733	639	715	625	627	589	680	625	657	482	598	427	392	311	242	200	167	554	678							YDR073W	0.000297944	0.000290354	0.000291636	0.000272647	0.000277071	0.000283092	0.000281216	0.00026974	0.000293729	0.000274647
		YDR074W	1125	1086	1126	897	750	1034	831	953	923	1104	977	1016	971	1050	779	763	818	750	667	698	532	697	376	365	280	239	138	174	1562	1867							YDR074W	0.000398085	0.000405823	0.000390931	0.00039319	0.000367793	0.000414613	0.000364004	0.000394268	0.000361482	0.000386255
		YDR075W	0	0	0	0	0	0	0	0	0	0	0	0	0	0	0	0	0	0	0	0	0	0	0	0	0	0	0	0	0	0							YDR075W	0	0	0	0	0	0	0	0	0	0
		YDR076W	470	456	480	405	316	329	313	373	326	349	284	316	223	274	295	306	324	349	272	320	276	343	372	264	358	364	407	329	426	567							YDR076W	0.000166311	0.000170401	0.000166649	0.000177527	0.000154963	0.000131922	0.000137104	0.000154315	0.000127674	0.000122104
		YDR077W	2	0	1	0	1	0	0	1	2	0	2	2	2	0	0	0	0	1	3	1	0	1	1	5	0	1	1	1	0	0							YDR077W	7.07706e-07	0	3.47185e-07	0	4.90391e-07	0	0	4.13712e-07	7.83276e-07	0
		YDR078C	698	711	554	513	447	580	473	558	519	596	512	502	434	476	496	525	1147	1068	2083	2365	3699	4618	9303	8800	19941	17717	21035	21477	398	620							YDR078C	0.000246989	0.000265691	0.000192341	0.000224868	0.000219205	0.000232568	0.000207189	0.000230851	0.00020326	0.000208522
		YDR079C-A	0	0	0	0	0	0	0	0	0	0	0	0	0	0	0	0	0	0	0	0	0	0	0	0	0	0	0	0	0	0							YDR079C-A	0	0	0	0	0	0	0	0	0	0
		YDR079W	308	294	293	255	218	269	215	264	261	278	231	218	202	236	184	191	58	49	25	25	16	20	10	17	25	22	10	17	466	714							YDR079W	0.000108987	0.000109864	0.000101725	0.000111777	0.000106905	0.000107864	9.41768e-05	0.00010922	0.000102218	9.72634e-05
		YDR080W	1	5	5	8	5	1	0	4	3	1	2	3	1	3	3	2	1	1	1	2	2	1	0	0	1	0	1	1	0	3							YDR080W	3.53853e-07	1.86843e-06	1.73593e-06	3.50671e-06	2.45195e-06	4.0098e-07	0	1.65485e-06	1.17491e-06	3.49868e-07
		YDR083W	775	709	627	488	382	521	378	365	338	372	309	310	255	299	426	482	486	519	766	722	831	1005	1285	1032	658	483	158	138	639	774							YDR083W	0.000274236	0.000264943	0.000217685	0.00021391	0.000187329	0.00020891	0.000165576	0.000151005	0.000132374	0.000130151
		YDR084C	0	0	0	0	0	0	0	0	0	0	0	0	0	0	0	0	0	0	0	0	0	0	0	0	0	0	0	0	0	0							YDR084C	0	0	0	0	0	0	0	0	0	0
		YDR085C	808	769	837	617	570	647	689	728	748	803	705	822	685	705	646	590	833	748	675	738	617	760	478	510	284	260	196	200	515	563							YDR085C	0.000285913	0.000287364	0.000290594	0.000270455	0.000279523	0.000259434	0.000301804	0.000301183	0.000292945	0.000280944
		YDR089W	843	786	820	652	628	715	663	748	842	801	792	747	630	700	625	607	698	770	558	623	586	762	475	426	281	271	168	188	508	626							YDR089W	0.000298298	0.000293717	0.000284692	0.000285797	0.000307965	0.000286701	0.000290415	0.000309457	0.000329759	0.000280245
		YDR090C	0	0	0	0	0	0	0	0	0	0	0	0	0	0	0	0	0	0	0	0	0	0	0	0	0	0	0	0	0	0							YDR090C	0	0	0	0	0	0	0	0	0	0
		YDR092W	0	0	0	0	0	0	0	0	0	0	0	0	0	0	0	0	0	0	0	0	0	0	0	0	0	0	0	0	0	0							YDR092W	0	0	0	0	0	0	0	0	0	0
		YDR093W	784	746	790	618	544	787	658	703	768	806	697	695	645	665	611	584	723	692	643	748	616	684	464	222	236	276	129	169	581	638							YDR093W	0.000277421	0.00027877	0.000274276	0.000270894	0.000266772	0.000315571	0.000288225	0.00029084	0.000300778	0.000281994
		YDR094W	226	291	340	308	264	340	323	399	267	448	328	365	306	410	267	261	238	348	304	270	142	123	124	24	88	90	39	55	97	123							YDR094W	7.99708e-05	0.000108743	0.000118043	0.000135008	0.000129463	0.000136333	0.000141484	0.000165071	0.000104567	0.000156741
		YDR095C	794	807	762	673	647	699	682	742	747	828	686	739	618	745	648	561	776	720	654	776	729	934	671	620	457	415	239	262	666	705							YDR095C	0.000280959	0.000301564	0.000264555	0.000295002	0.000317283	0.000280285	0.000298738	0.000306974	0.000292554	0.000289691
		YDR096W	975	861	954	803	798	945	880	920	991	1205	1077	1082	970	1074	740	740	1301	1338	2071	2162	2124	2485	1550	1449	1038	855	440	491	509	585							YDR096W	0.000345007	0.000321743	0.000331215	0.000351986	0.000391332	0.000378926	0.000385468	0.000380615	0.000388113	0.000421592
		YDR097C	801	880	840	723	654	704	743	709	720	879	778	822	730	767	686	664	788	836	733	827	734	858	554	512	430	345	249	351	622	722							YDR097C	0.000283436	0.000328843	0.000291636	0.000316919	0.000320715	0.00028229	0.000325458	0.000293322	0.000281979	0.000307534
		YDR098C	634	620	619	521	480	533	499	506	598	672	573	573	463	498	484	494	446	472	272	261	151	175	85	77	40	41	28	21	552	733							YDR098C	0.000224343	0.000231685	0.000214908	0.000228375	0.000235387	0.000213722	0.000218578	0.000209338	0.0002342	0.000235112
		YDR099W	0	0	0	0	0	0	0	0	0	0	0	0	0	0	0	0	0	0	0	0	0	0	0	0	0	0	0	0	0	0							YDR099W	0	0	0	0	0	0	0	0	0	0
		YDR100W	698	675	706	626	501	654	600	660	596	765	622	699	549	664	565	540	609	772	570	665	500	515	342	190	188	170	109	135	391	367							YDR100W	0.000246989	0.000252238	0.000245113	0.0002744	0.000245686	0.000262241	0.000262819	0.00027305	0.000233416	0.000267649
		YDR101C	622	611	668	485	339	445	328	349	323	358	274	339	257	285	394	371	561	584	1019	931	942	1218	1460	1266	1263	1060	593	588	580	637							YDR101C	0.000220097	0.000228322	0.00023192	0.000212595	0.000166242	0.000178436	0.000143674	0.000144386	0.000126499	0.000125253
		YDR102C	801	774	816	663	580	771	688	740	793	867	766	803	760	737	669	624	818	887	752	816	772	854	569	512	364	339	189	194	578	711							YDR102C	0.000283436	0.000289233	0.000283303	0.000290619	0.000284427	0.000309155	0.000301366	0.000306147	0.000310569	0.000303336
		YDR103W	0	0	0	0	0	0	0	0	0	0	0	0	0	0	0	0	0	0	0	0	0	0	0	0	0	0	0	0	0	0							YDR103W	0	0	0	0	0	0	0	0	0	0
		YDR104C	743	690	730	652	545	654	729	656	737	815	759	746	634	723	592	508	726	726	644	755	575	772	494	485	304	247	149	233	540	633							YDR104C	0.000262913	0.000257843	0.000253445	0.000285797	0.000267263	0.000262241	0.000319325	0.000271395	0.000288637	0.000285143
		YDR105C	0	0	0	0	0	0	0	0	0	0	0	0	0	0	0	0	0	0	0	0	0	0	0	0	0	0	0	0	0	0							YDR105C	0	0	0	0	0	0	0	0	0	0
		YDR107C	0	5	0	0	1	1	0	0	1	2	0	0	0	0	1	1	0	1	0	0	1	3	4	0	0	2	0	0	0	4							YDR107C	0	1.86843e-06	0	0	4.90391e-07	4.0098e-07	0	0	3.91638e-07	6.99737e-07
		YDR108W	673	734	715	630	596	650	591	655	726	774	679	754	662	684	602	534	591	568	490	477	397	461	359	317	253	248	124	154	554	754							YDR108W	0.000238143	0.000274285	0.000248238	0.000276154	0.000292273	0.000260637	0.000258877	0.000270982	0.000284329	0.000270798
		YDR109C	719	633	774	605	560	632	666	603	675	740	639	656	640	602	612	503	622	691	586	630	535	594	370	322	216	184	104	111	508	582							YDR109C	0.00025442	0.000236543	0.000268721	0.000265195	0.000274619	0.000253419	0.000291729	0.000249468	0.000264356	0.000258903
		YDR110W	742	735	802	622	561	653	645	625	697	781	689	695	547	618	656	569	657	656	594	628	436	507	227	225	120	111	78	104	571	698							YDR110W	0.000262559	0.000274659	0.000278443	0.000272647	0.000275109	0.00026184	0.000282531	0.00025857	0.000272972	0.000273247
		YDR111C	732	653	707	619	505	740	638	670	795	807	741	716	600	721	595	577	661	703	616	662	591	669	429	404	275	240	165	175	461	550							YDR111C	0.00025902	0.000244017	0.00024546	0.000271332	0.000247647	0.000296725	0.000279464	0.000277187	0.000311352	0.000282344
		YDR112W	750	738	751	583	556	649	653	696	759	794	713	723	614	767	671	606	681	709	611	725	536	720	394	432	272	232	169	146	546	691							YDR112W	0.00026539	0.00027578	0.000260736	0.000255552	0.000272657	0.000260236	0.000286035	0.000287944	0.000297253	0.000277796
		YDR114C	0	0	0	0	0	0	0	0	0	0	0	0	0	0	0	0	0	0	0	0	0	0	0	0	0	0	0	0	0	0							YDR114C	0	0	0	0	0	0	0	0	0	0
		YDR115W	0	0	0	0	0	0	0	0	0	0	0	0	0	0	0	0	0	0	0	0	0	0	0	0	0	0	0	0	0	0							YDR115W	0	0	0	0	0	0	0	0	0	0
		YDR116C	0	0	0	0	0	0	0	0	0	0	0	0	0	0	0	0	0	0	0	0	0	0	0	0	0	0	0	0	0	0							YDR116C	0	0	0	0	0	0	0	0	0	0
		YDR117C	795	705	799	620	550	634	614	642	726	755	625	639	534	625	620	567	686	628	571	663	560	696	412	341	227	226	108	111	519	631							YDR117C	0.000281313	0.000263448	0.000277401	0.00027177	0.000269715	0.000254221	0.000268952	0.000265603	0.000284329	0.000264151
		YDR119W	783	715	831	625	576	708	646	654	803	866	790	768	629	681	611	530	725	791	647	717	649	751	470	425	260	250	194	183	571	667							YDR119W	0.000277067	0.000267185	0.000288511	0.000273962	0.000282465	0.000283894	0.000282969	0.000270568	0.000314485	0.000302986
		YDR120C	0	0	0	0	0	0	0	0	0	0	0	0	0	0	0	0	0	0	0	0	0	0	0	0	0	0	0	0	0	0							YDR120C	0	0	0	0	0	0	0	0	0	0
		YDR121W	696	698	635	507	531	564	504	586	578	641	529	548	474	538	493	447	506	530	512	528	419	540	418	347	280	245	128	122	517	664							YDR121W	0.000246282	0.000260833	0.000220463	0.000222238	0.000260397	0.000226153	0.000220768	0.000242435	0.000226367	0.000224266
		YDR122W	1609	1475	1526	1260	1196	1454	1333	1352	1530	1653	1573	1439	1274	1457	1220	1165	1374	1309	1156	1187	890	1136	593	573	296	277	182	160	1184	1399							YDR122W	0.000569349	0.000551187	0.000529805	0.000552307	0.000586507	0.000583025	0.000583896	0.000559339	0.000599206	0.000578333
		YDR123C	537	504	437	414	333	407	338	453	353	443	381	387	344	395	347	347	380	398	371	401	354	454	317	338	190	238	154	177	556	768							YDR123C	0.000190019	0.000188338	0.00015172	0.000181472	0.0001633	0.000163199	0.000148055	0.000187412	0.000138248	0.000154992
		YDR124W	902	818	868	726	632	755	708	787	826	947	823	798	742	756	714	681	795	757	694	662	539	736	404	428	254	287	134	182	643	773							YDR124W	0.000319175	0.000305675	0.000301357	0.000318234	0.000309927	0.00030274	0.000310127	0.000325592	0.000323493	0.000331325
		YDR125C	0	0	11	2	1	2	1	3	3	7	5	4	1	3	0	1	0	1	1	1	0	0	1	0	0	1	0	0	2	1							YDR125C	0	0	3.81904e-06	8.76679e-07	4.90391e-07	8.0196e-07	4.38032e-07	1.24114e-06	1.17491e-06	2.44908e-06
		YDR126W	0	0	0	0	0	0	0	0	0	0	0	0	0	0	0	0	0	0	0	0	0	0	0	0	0	0	0	0	0	0							YDR126W	0	0	0	0	0	0	0	0	0	0
		YDR127W	0	0	0	0	0	0	0	0	0	0	0	0	0	0	0	0	0	0	0	0	0	0	0	0	0	0	0	0	0	0							YDR127W	0	0	0	0	0	0	0	0	0	0
		YDR128W	872	813	843	696	658	776	789	761	853	929	805	845	767	844	711	619	808	891	876	917	963	1205	821	727	612	534	292	272	459	610							YDR128W	0.00030856	0.000303807	0.000292677	0.000305084	0.000322677	0.00031116	0.000345607	0.000314835	0.000334067	0.000325028
		YDR129C	346	345	255	201	152	193	162	170	158	194	144	177	123	139	127	142	153	141	166	141	100	71	36	36	47	36	13	15	779	933							YDR129C	0.000122433	0.000128922	8.85323e-05	8.81062e-05	7.45394e-05	7.73891e-05	7.09612e-05	7.03311e-05	6.18788e-05	6.78745e-05
		YDR130C	786	725	790	647	582	654	652	660	773	798	771	676	632	735	639	522	756	675	709	682	590	676	361	350	236	226	125	144	551	681							YDR130C	0.000278128	0.000270922	0.000274276	0.000283605	0.000285407	0.000262241	0.000285597	0.00027305	0.000302736	0.000279195
		YDR131C	1241	1317	1223	1062	964	1083	1064	1086	1124	1325	1125	1139	930	1126	1047	940	1134	1154	1036	1084	932	1149	685	669	595	447	356	395	1248	1580							YDR131C	0.000439131	0.000492144	0.000424608	0.000465516	0.000472736	0.000434261	0.000466066	0.000449291	0.000440201	0.000463576
		YDR132C	824	839	893	742	663	837	674	736	848	927	889	805	663	808	727	680	700	769	541	614	454	530	274	234	178	126	86	114	553	829							YDR132C	0.000291575	0.000313522	0.000310037	0.000325248	0.000325129	0.00033562	0.000295233	0.000304492	0.000332109	0.000324328
		YDR133C	788	691	774	658	554	753	663	725	795	840	766	768	664	714	629	570	698	789	653	745	669	887	539	597	423	343	212	246	539	647							YDR133C	0.000278836	0.000258217	0.000268721	0.000288427	0.000271676	0.000301938	0.000290415	0.000299941	0.000311352	0.00029389
		YDR134C	225	240	210	205	202	225	195	219	250	259	247	207	223	280	180	213	367	361	1095	1141	2414	2525	6429	6155	14408	13319	16537	17888	417	569							YDR134C	7.96169e-05	8.96846e-05	7.29089e-05	8.98595e-05	9.90589e-05	9.02205e-05	8.54162e-05	9.0603e-05	9.79095e-05	9.06159e-05
		YDR135C	659	609	625	517	443	556	459	498	576	630	582	543	451	534	480	481	591	612	542	574	525	668	408	310	255	178	93	101	623	730							YDR135C	0.000233189	0.000227575	0.000216991	0.000226621	0.000217243	0.000222945	0.000201057	0.000206029	0.000225584	0.000220417
		YDR136C	179	173	123	94	51	57	44	40	52	70	46	42	31	45	44	44	24	23	17	21	12	12	18	5	17	17	12	16	541	594							YDR136C	6.33397e-05	6.46476e-05	4.27038e-05	4.12039e-05	2.50099e-05	2.28559e-05	1.92734e-05	1.65485e-05	2.03652e-05	2.44908e-05
		YDR137W	186	208	110	116	66	72	45	68	57	55	37	57	36	43	50	68	43	31	22	27	13	19	11	18	9	18	12	9	505	602							YDR137W	6.58166e-05	7.77266e-05	3.81904e-05	5.08474e-05	3.23658e-05	2.88705e-05	1.97114e-05	2.81324e-05	2.23234e-05	1.92428e-05
		YDR138W	0	0	0	0	0	0	0	0	0	0	0	0	0	0	0	0	0	0	0	0	0	1	0	0	0	0	0	0	0	0							YDR138W	0	0	0	0	0	0	0	0	0	0
		YDR139C	0	1	3	2	0	0	0	2	0	2	0	2	2	4	2	0	0	0	0	2	0	1	0	0	0	0	0	0	0	0							YDR139C	0	3.73686e-07	1.04156e-06	8.76679e-07	0	0	0	8.27424e-07	0	6.99737e-07
		YDR140W	0	0	0	0	0	0	0	0	0	0	0	0	0	0	0	0	0	0	0	0	0	0	0	0	0	0	0	0	0	0							YDR140W	0	0	0	0	0	0	0	0	0	0
		YDR142C	2	1	2	5	2	2	1	2	2	5	2	3	1	1	1	1	3	0	1	1	2	2	6	3	1	1	0	1	1	1							YDR142C	7.07706e-07	3.73686e-07	6.94371e-07	2.1917e-06	9.80781e-07	8.0196e-07	4.38032e-07	8.27424e-07	7.83276e-07	1.74934e-06
		YDR143C	818	854	777	632	674	840	743	756	862	893	811	855	698	862	729	653	764	833	781	826	877	1110	1147	995	1026	903	692	604	598	835							YDR143C	0.000289452	0.000319128	0.000269763	0.00027703	0.000330523	0.000336823	0.000325458	0.000312766	0.000337592	0.000312433
		YDR144C	882	791	828	733	630	730	754	710	813	850	882	830	679	768	653	617	773	772	701	875	721	871	540	534	347	355	204	209	629	744							YDR144C	0.000312098	0.000295585	0.000287469	0.000321303	0.000308946	0.000292715	0.000330276	0.000293736	0.000318402	0.000297388
		YDR146C	0	0	0	0	0	0	0	1	0	0	0	0	0	0	0	0	0	0	0	0	0	0	0	0	0	0	0	0	0	0							YDR146C	0	0	0	0	0	0	0	4.13712e-07	0	0
		YDR147W	0	0	0	0	0	0	0	0	0	0	0	0	0	0	0	0	0	0	0	0	0	0	0	0	0	0	0	0	0	0							YDR147W	0	0	0	0	0	0	0	0	0	0
		YDR148C	946	869	965	793	763	902	799	840	895	1067	909	936	858	920	768	687	870	902	712	762	564	713	424	407	281	237	144	169	619	707							YDR148C	0.000334745	0.000324733	0.000335034	0.000347603	0.000374168	0.000361684	0.000349987	0.000347518	0.000350516	0.00037331
		YDR149C	369	342	392	275	250	306	288	280	301	334	314	236	225	285	249	207	261	252	265	297	225	276	143	124	105	83	64	57	475	612							YDR149C	0.000130572	0.000127801	0.000136097	0.000120543	0.000122598	0.0001227	0.000126153	0.000115839	0.000117883	0.000116856
		YDR150W	374	314	311	293	250	281	283	268	280	331	285	290	256	320	212	221	235	237	246	250	205	262	137	119	131	76	73	82	473	678							YDR150W	0.000132341	0.000117337	0.000107975	0.000128433	0.000122598	0.000112675	0.000123963	0.000110875	0.000109659	0.000115806
		YDR151C	955	825	878	777	694	799	756	724	848	1007	876	857	777	805	740	717	924	1018	878	944	886	1076	808	759	518	476	241	254	483	646							YDR151C	0.00033793	0.000308291	0.000304829	0.00034059	0.000340331	0.000320383	0.000331152	0.000299528	0.000332109	0.000352318
		YDR152W	707	733	723	638	505	669	625	711	742	891	690	792	634	715	674	598	770	658	697	798	636	796	542	412	350	275	178	187	573	807							YDR152W	0.000250174	0.000273912	0.000251015	0.00027966	0.000247647	0.000268256	0.00027377	0.000294149	0.000290595	0.000311733
		YDR153C	1102	1101	1191	1011	869	1045	909	977	1074	1217	1161	1057	940	1118	970	913	965	898	784	905	869	1049	582	684	458	431	232	323	689	888							YDR153C	0.000389946	0.000411428	0.000413498	0.000443161	0.000426149	0.000419024	0.000398171	0.000404197	0.000420619	0.00042579
		YDR154C	818	820	904	750	620	791	741	759	844	886	814	767	684	908	669	696	719	661	689	640	594	674	366	375	186	162	115	103	579	758							YDR154C	0.000289452	0.000306422	0.000313856	0.000328754	0.000304042	0.000317175	0.000324582	0.000314008	0.000330543	0.000309983
		YDR155C	810	667	802	632	541	697	671	650	698	761	705	622	591	654	560	570	633	652	583	539	524	658	310	316	218	137	74	88	464	565							YDR155C	0.000286621	0.000249248	0.000278443	0.00027703	0.000265301	0.000279483	0.000293919	0.000268913	0.000273363	0.00026625
		YDR156W	751	698	690	544	491	569	465	429	534	538	485	448	423	516	547	440	489	536	540	577	776	1003	1228	1145	1043	791	531	454	604	739							YDR156W	0.000265744	0.000260833	0.000239558	0.000238457	0.000240782	0.000228158	0.000203685	0.000177483	0.000209135	0.000188229
		YDR157W	885	791	742	633	555	739	582	689	649	694	616	655	510	577	599	552	639	655	512	675	472	587	308	310	173	202	119	119	507	674							YDR157W	0.00031316	0.000295585	0.000257612	0.000277469	0.000272167	0.000296324	0.000254935	0.000285048	0.000254173	0.000242809
		YDR158W	736	723	879	703	579	767	635	765	741	849	759	779	714	730	630	612	678	730	698	782	672	727	519	314	333	315	150	233	510	555							YDR158W	0.000260436	0.000270175	0.000305176	0.000308152	0.000283936	0.000307552	0.00027815	0.00031649	0.000290204	0.000297038
		YDR159W	88	91	56	47	46	40	22	54	29	32	35	28	24	18	21	18	49	42	88	74	145	180	339	249	703	685	868	764	286	332							YDR159W	3.11391e-05	3.40054e-05	1.94424e-05	2.06019e-05	2.2558e-05	1.60392e-05	9.6367e-06	2.23405e-05	1.13575e-05	1.11958e-05
		YDR161W	851	743	774	686	581	714	661	717	785	761	689	739	670	706	727	588	823	862	743	697	606	802	562	451	383	284	160	186	638	867							YDR161W	0.000301129	0.000277649	0.000268721	0.000300701	0.000284917	0.0002863	0.000289539	0.000296632	0.000307436	0.00026625
		YDR162C	336	267	243	205	197	238	248	228	230	225	216	206	193	221	148	148	50	66	33	35	36	30	26	28	25	28	16	19	464	623							YDR162C	0.000118895	9.97741e-05	8.4366e-05	8.98595e-05	9.66069e-05	9.54332e-05	0.000108632	9.43264e-05	9.00768e-05	7.87204e-05
		YDR163W	675	589	642	496	453	542	507	578	563	647	632	579	480	536	531	478	566	557	393	443	362	457	278	293	208	188	134	132	461	566							YDR163W	0.000238851	0.000220101	0.000222893	0.000217416	0.000222147	0.000217331	0.000222082	0.000239126	0.000220492	0.000226365
		YDR165W	8	19	46	23	25	41	37	35	32	40	36	37	33	32	11	23	8	14	3	2	2	0	1	0	0	2	0	1	5	11							YDR165W	2.83082e-06	7.10003e-06	1.59705e-05	1.00818e-05	1.22598e-05	1.64402e-05	1.62072e-05	1.44799e-05	1.25324e-05	1.39947e-05
		YDR169C	852	826	910	713	685	805	776	900	848	972	788	855	724	874	669	621	704	736	601	676	530	723	411	395	272	251	131	142	555	686							YDR169C	0.000301483	0.000308664	0.000315939	0.000312536	0.000335918	0.000322789	0.000339913	0.000372341	0.000332109	0.000340072
		YDR169C-A	0	0	0	0	0	0	0	0	0	0	0	0	0	0	0	0	0	0	0	0	0	0	0	0	0	0	0	0	0	0							YDR169C-A	0	0	0	0	0	0	0	0	0	0
		YDR171W	975	922	936	774	721	851	808	820	887	992	910	875	818	929	707	650	848	969	811	812	814	930	525	530	365	370	198	248	559	696							YDR171W	0.000345007	0.000344538	0.000324965	0.000339275	0.000353572	0.000341234	0.00035393	0.000339244	0.000347383	0.00034707
		YDR173C	0	0	0	0	0	0	0	0	0	0	0	0	0	0	0	0	0	0	0	0	0	0	0	0	0	0	0	0	0	0							YDR173C	0	0	0	0	0	0	0	0	0	0
		YDR174W	641	668	553	485	392	463	293	371	315	363	258	308	213	245	424	453	644	702	1739	1667	2547	2523	5430	5020	9111	7636	5312	5811	448	521							YDR174W	0.00022682	0.000249622	0.000191993	0.000212595	0.000192233	0.000185654	0.000128343	0.000153487	0.000123366	0.000127002
		YDR175C	181	200	194	156	143	175	152	136	161	167	150	183	105	138	136	110	26	30	13	15	17	10	21	1	13	5	7	12	256	351							YDR175C	6.40474e-05	7.47372e-05	6.7354e-05	6.83809e-05	7.01258e-05	7.01715e-05	6.65808e-05	5.62649e-05	6.30537e-05	5.8428e-05
		YDR176W	0	0	0	0	0	0	0	0	0	0	0	0	0	0	0	0	0	0	0	0	0	0	0	0	0	0	0	0	3	1							YDR176W	0	0	0	0	0	0	0	0	0	0
		YDR178W	0	0	0	0	0	0	0	0	0	0	0	0	0	0	0	0	1	0	0	0	0	0	0	0	0	0	0	0	1	0							YDR178W	0	0	0	0	0	0	0	0	0	0
		YDR179C	0	0	0	0	0	0	0	0	0	0	0	2	0	2	0	0	0	0	0	0	1	0	0	0	0	0	0	0	0	0							YDR179C	0	0	0	0	0	0	0	0	0	0
		YDR179W-A	0	0	0	0	0	0	0	0	0	0	0	0	0	0	0	0	0	0	0	0	0	0	0	0	0	0	0	0	0	0							YDR179W-A	0	0	0	0	0	0	0	0	0	0
		YDR181C	892	887	836	738	639	805	754	898	881	981	980	908	728	901	774	657	568	594	367	402	498	618	599	609	727	622	540	552	545	645							YDR181C	0.000315637	0.000331459	0.000290247	0.000323494	0.00031336	0.000322789	0.000330276	0.000371514	0.000345033	0.000343221
		YDR182W-A	0	0	0	0	0	0	0	0	0	0	0	0	0	0	0	0	0	0	0	0	0	0	0	0	0	0	0	0	0	0							YDR182W-A	0	0	0	0	0	0	0	0	0	0
		YDR183W	0	0	0	0	0	0	0	0	0	0	0	0	0	0	0	0	0	0	0	0	0	0	0	0	0	0	0	0	0	0							YDR183W	0	0	0	0	0	0	0	0	0	0
		YDR184C	765	735	736	542	556	632	632	601	580	731	657	677	568	620	576	578	756	789	751	815	993	1198	1374	1155	1171	806	620	561	513	657							YDR184C	0.000270697	0.000274659	0.000255528	0.00023758	0.000272657	0.000253419	0.000276836	0.000248641	0.00022715	0.000255754
		YDR185C	833	746	777	642	605	717	685	714	810	806	811	762	670	710	675	574	776	862	716	747	627	764	530	471	370	310	193	221	534	686							YDR185C	0.000294759	0.00027877	0.000269763	0.000281414	0.000296686	0.000287503	0.000300052	0.000295391	0.000317227	0.000281994
		YDR186C	1059	1028	1035	797	703	943	884	966	1023	1208	1133	1080	971	1020	816	776	986	908	872	901	1080	1444	1504	1442	1783	1595	1319	1222	635	701							YDR186C	0.00037473	0.000384149	0.000359337	0.000349356	0.000344745	0.000378124	0.00038722	0.000399646	0.000400646	0.000422641
		YDR191W	629	525	541	430	378	514	434	481	544	598	573	505	477	474	420	401	467	518	478	528	469	551	326	395	216	177	114	105	413	574							YDR191W	0.000222573	0.000196185	0.000187827	0.000188486	0.000185368	0.000206104	0.000190106	0.000198996	0.000213051	0.000209221
		YDR192C	789	690	751	621	495	671	578	622	704	693	644	709	579	673	586	496	654	701	698	765	620	773	427	401	211	251	124	137	592	622							YDR192C	0.00027919	0.000257843	0.000260736	0.000272209	0.000242743	0.000269057	0.000253182	0.000257329	0.000275713	0.000242459
		YDR193W	0	0	1	0	0	0	0	0	0	0	0	0	0	0	0	0	0	0	1	1	1	0	0	0	0	0	1	0	0	0							YDR193W	0	0	3.47185e-07	0	0	0	0	0	0	0
		YDR194C	295	312	271	204	199	206	180	212	194	250	194	193	125	173	171	191	36	24	22	14	20	16	14	17	14	19	7	7	446	600							YDR194C	0.000104387	0.00011659	9.40872e-05	8.94212e-05	9.75877e-05	8.26018e-05	7.88457e-05	8.7707e-05	7.59778e-05	8.74671e-05
		YDR194W-A	0	0	0	0	0	0	0	0	0	0	0	0	0	0	0	0	0	0	0	0	0	0	0	0	0	0	0	0	0	0							YDR194W-A	0	0	0	0	0	0	0	0	0	0
		YDR195W	0	0	0	0	0	0	0	0	0	0	0	0	0	0	0	0	0	0	0	0	0	0	0	0	0	0	0	0	0	0							YDR195W	0	0	0	0	0	0	0	0	0	0
		YDR197W	0	0	0	0	0	0	0	0	0	0	0	0	0	0	0	0	0	0	0	0	0	0	0	0	0	0	0	0	0	0							YDR197W	0	0	0	0	0	0	0	0	0	0
		YDR198C	836	768	716	673	597	721	675	709	753	845	713	745	684	752	673	533	860	756	764	756	721	818	551	465	351	289	214	183	507	597							YDR198C	0.000295821	0.000286991	0.000248585	0.000295002	0.000292763	0.000289106	0.000295672	0.000293322	0.000294903	0.000295639
		YDR199W	0	0	0	0	0	0	0	0	0	0	0	0	0	0	0	0	0	0	0	0	0	0	0	0	0	0	0	0	0	0							YDR199W	0	0	0	0	0	0	0	0	0	0
		YDR200C	299	340	389	325	231	234	203	231	172	221	175	195	127	166	307	283	252	358	331	354	381	336	810	244	2069	2228	2758	2643	185	226							YDR200C	0.000105802	0.000127053	0.000135055	0.00014246	0.00011328	9.38293e-05	8.89205e-05	9.55675e-05	6.73617e-05	7.73209e-05
		YDR202C	477	459	456	415	333	461	359	349	360	433	412	403	312	371	354	343	292	326	224	250	184	253	135	93	114	96	75	107	442	534							YDR202C	0.000168788	0.000171522	0.000158317	0.000181911	0.0001633	0.000184852	0.000157253	0.000144386	0.00014099	0.000151493
		YDR203W	516	516	489	385	343	472	371	427	389	421	432	425	354	359	401	345	319	300	224	246	148	202	99	77	113	83	82	85	614	760							YDR203W	0.000182588	0.000192822	0.000169774	0.000168761	0.000168204	0.000189262	0.00016251	0.000176655	0.000152347	0.000147295
		YDR204W	315	303	287	217	206	234	199	226	205	266	236	217	193	211	161	150	34	49	16	21	18	11	15	16	21	12	17	11	402	548							YDR204W	0.000111464	0.000113227	9.96422e-05	9.51196e-05	0.00010102	9.38293e-05	8.71683e-05	9.3499e-05	8.02858e-05	9.3065e-05
		YDR205W	1048	1019	1066	898	835	907	893	977	1037	1195	1043	1107	858	1074	871	823	1094	1077	1099	1214	1051	1326	900	817	573	516	315	274	570	641							YDR205W	0.000370838	0.000380786	0.0003701	0.000393629	0.000409476	0.000363689	0.000391162	0.000404197	0.000406129	0.000418093
		YDR206W	105	109	121	114	94	125	125	109	94	137	122	138	99	126	118	108	77	116	57	93	41	45	28	4	22	19	12	16	43	37							YDR206W	3.71546e-05	4.07318e-05	4.20094e-05	4.99707e-05	4.60967e-05	5.01225e-05	5.4754e-05	4.50946e-05	3.6814e-05	4.7932e-05
		YDR207C	26	31	14	12	11	19	4	7	6	2	6	1	1	0	3	3	2	4	3	1	1	0	0	1	1	2	0	0	385	525							YDR207C	9.20018e-06	1.15843e-05	4.86059e-06	5.26007e-06	5.3943e-06	7.61862e-06	1.75213e-06	2.89599e-06	2.34983e-06	6.99737e-07
		YDR209C	1031	1222	1248	1003	976	1119	1019	1124	1245	1292	1162	1067	1200	1378	1218	1189	1175	1094	1138	1104	902	1145	730	705	534	457	308	282	922	1303							YDR209C	0.000364822	0.000456644	0.000433287	0.000439654	0.000478621	0.000448696	0.000446354	0.000465013	0.000487589	0.00045203
		YDR210W	818	832	849	709	721	745	754	768	795	832	897	830	724	766	684	628	757	843	750	781	700	854	482	505	336	307	196	189	521	630							YDR210W	0.000289452	0.000310907	0.00029476	0.000310783	0.000353572	0.00029873	0.000330276	0.000317731	0.000311352	0.000291091
		YDR213W	858	833	878	725	643	813	803	760	892	877	816	816	677	836	693	657	814	862	699	733	657	717	434	413	307	270	143	117	628	661							YDR213W	0.000303606	0.00031128	0.000304829	0.000317796	0.000315321	0.000325997	0.00035174	0.000314421	0.000349341	0.000306835
		YDR214W	745	769	781	677	619	774	637	676	774	853	847	817	690	747	619	633	655	774	538	678	532	567	363	200	311	275	153	167	450	516							YDR214W	0.00026362	0.000287364	0.000271152	0.000296756	0.000303552	0.000310358	0.000279026	0.000279669	0.000303128	0.000298438
		YDR215C	879	863	832	670	627	718	744	742	825	942	874	810	719	747	681	656	844	877	865	931	765	879	566	556	345	345	155	192	540	643							YDR215C	0.000311037	0.000322491	0.000288858	0.000293687	0.000307475	0.000287904	0.000325896	0.000306974	0.000323101	0.000329576
		YDR216W	1561	1635	1813	1530	1285	1745	1527	1580	1592	1977	1721	1779	1473	1785	1548	1412	1892	2025	2429	2577	2065	2223	1515	582	808	834	501	526	787	945							YDR216W	0.000552364	0.000610976	0.000629447	0.000670659	0.000630152	0.00069971	0.000668875	0.000653665	0.000623488	0.00069169
		YDR217C	91	117	147	133	109	161	148	172	111	187	191	167	135	184	139	108	119	147	110	134	60	59	44	4	26	41	25	15	42	40							YDR217C	3.22006e-05	4.37212e-05	5.10362e-05	5.82991e-05	5.34526e-05	6.45578e-05	6.48287e-05	7.11585e-05	4.34718e-05	6.54254e-05
		YDR218C	1031	1123	1015	793	766	937	839	1014	1025	1101	977	1026	901	960	882	758	926	1007	861	909	741	905	498	372	292	289	157	155	679	853							YDR218C	0.000364822	0.000419649	0.000352393	0.000347603	0.000375639	0.000375718	0.000367509	0.000419504	0.000401429	0.000385205
		YDR219C	981	800	864	738	674	778	678	726	872	896	836	764	684	794	676	613	748	809	729	780	560	674	372	292	215	175	146	121	559	743							YDR219C	0.00034713	0.000298949	0.000299968	0.000323494	0.000330523	0.000311962	0.000296986	0.000300355	0.000341508	0.000313482
		YDR220C	931	916	972	708	608	909	806	844	880	944	894	907	787	827	776	710	868	941	829	887	778	948	535	508	344	262	187	215	532	675							YDR220C	0.000329437	0.000342296	0.000337464	0.000310344	0.000298157	0.000364491	0.000353054	0.000349173	0.000344641	0.000330276
		YDR221W	4	1	1	0	2	0	1	4	2	1	0	2	0	3	1	2	3	1	2	4	0	0	1	10	2	1	2	2	2	4							YDR221W	1.41541e-06	3.73686e-07	3.47185e-07	0	9.80781e-07	0	4.38032e-07	1.65485e-06	7.83276e-07	3.49868e-07
		YDR222W	3	2	2	0	0	0	1	0	1	2	2	0	1	0	0	1	1	2	1	1	0	2	0	3	1	1	0	1	0	0							YDR222W	1.06156e-06	7.47372e-07	6.94371e-07	0	0	0	4.38032e-07	0	3.91638e-07	6.99737e-07
		YDR223W	1010	916	902	844	752	942	766	905	972	1013	1059	919	821	897	795	729	845	929	825	852	709	849	556	489	348	298	190	160	564	748							YDR223W	0.000357391	0.000342296	0.000313161	0.000369958	0.000368774	0.000377723	0.000335532	0.00037441	0.000380672	0.000354417
		YDR225W	0	0	0	0	0	0	0	0	0	0	0	0	0	0	0	0	0	0	0	0	0	0	0	0	0	0	0	0	0	0							YDR225W	0	0	0	0	0	0	0	0	0	0
		YDR226W	93	123	55	73	30	47	37	30	33	49	44	29	24	17	41	51	46	56	65	79	75	45	80	24	116	129	59	46	212	217							YDR226W	3.29083e-05	4.59634e-05	1.90952e-05	3.19988e-05	1.47117e-05	1.88461e-05	1.62072e-05	1.24114e-05	1.29241e-05	1.71436e-05
		YDR227W	0	0	0	0	0	0	0	0	0	0	0	0	0	0	0	0	0	0	0	0	0	0	0	0	0	0	0	0	0	0							YDR227W	0	0	0	0	0	0	0	0	0	0
		YDR229W	979	947	1017	806	757	871	877	824	890	1039	903	855	825	917	786	750	889	918	746	901	711	888	526	560	396	346	248	215	587	780							YDR229W	0.000346422	0.00035388	0.000353087	0.000353301	0.000371226	0.000349253	0.000384154	0.000340899	0.000348558	0.000363513
		YDR230W	389	386	376	347	312	294	271	337	315	320	250	287	249	276	229	226	50	55	18	33	25	26	31	14	16	24	26	17	440	618							YDR230W	0.000137649	0.000144243	0.000130542	0.000152104	0.000153002	0.000117888	0.000118707	0.000139421	0.000123366	0.000111958
		YDR231C	0	0	0	0	0	0	0	0	0	0	0	0	0	0	0	0	0	1	0	1	0	0	0	0	0	0	0	0	0	0							YDR231C	0	0	0	0	0	0	0	0	0	0
		YDR233C	0	0	0	0	0	0	0	0	0	0	0	0	0	0	0	0	0	0	0	0	0	0	0	0	0	0	0	0	0	0							YDR233C	0	0	0	0	0	0	0	0	0	0
		YDR234W	0	0	0	0	0	0	0	1	0	0	0	0	0	0	0	0	0	0	0	0	0	0	0	0	0	0	0	0	0	0							YDR234W	0	0	0	0	0	0	0	4.13712e-07	0	0
		YDR237W	164	139	109	94	71	77	47	61	52	51	45	34	32	30	41	37	4	13	3	2	4	4	3	1	1	1	4	2	394	564							YDR237W	5.80319e-05	5.19423e-05	3.78432e-05	4.12039e-05	3.48177e-05	3.08754e-05	2.05875e-05	2.52364e-05	2.03652e-05	1.78433e-05
		YDR239C	910	816	977	675	720	815	754	775	865	943	897	881	747	812	696	633	846	795	774	791	664	808	441	483	281	243	103	147	635	732							YDR239C	0.000322006	0.000304928	0.0003392	0.000295879	0.000353081	0.000326799	0.000330276	0.000320627	0.000338767	0.000329926
		YDR241W	606	599	628	491	471	574	530	546	607	643	622	586	513	541	529	434	419	415	313	318	226	321	195	191	157	99	90	77	642	782							YDR241W	0.000214435	0.000223838	0.000218032	0.000215225	0.000230974	0.000230162	0.000232157	0.000225887	0.000237724	0.000224965
		YDR242W	1117	994	1120	862	803	941	891	996	1091	1146	1025	998	903	1011	938	795	988	1032	869	940	840	1017	667	683	471	423	229	263	635	711							YDR242W	0.000395254	0.000371444	0.000388848	0.000377848	0.000393784	0.000377322	0.000390286	0.000412057	0.000427277	0.000400949
		YDR244W	904	953	910	712	574	675	569	605	563	564	473	539	371	392	721	653	759	834	825	992	1040	1244	1272	1120	999	996	588	626	601	772							YDR244W	0.000319883	0.000356123	0.000315939	0.000312098	0.000281484	0.000270661	0.00024924	0.000250296	0.000220492	0.000197326
		YDR245W	360	302	286	250	182	211	158	178	147	218	141	122	104	90	176	178	99	159	126	137	165	135	273	134	739	618	1067	1017	289	301							YDR245W	0.000127387	0.000112853	9.9295e-05	0.000109585	8.92511e-05	8.46067e-05	6.9209e-05	7.36408e-05	5.75708e-05	7.62713e-05
		YDR246W-A	0	0	0	0	0	0	0	0	0	0	0	0	0	0	0	0	0	0	0	0	0	0	0	0	0	0	0	0	0	0							YDR246W-A	0	0	0	0	0	0	0	0	0	0
		YDR247W	419	363	446	351	330	361	390	404	402	495	390	387	399	404	382	325	354	389	302	354	355	432	298	306	199	180	121	109	561	697							YDR247W	0.000148264	0.000135648	0.000154845	0.000153857	0.000161829	0.000144754	0.000170832	0.00016714	0.000157438	0.000173185
		YDR248C	1011	902	925	763	690	836	765	796	924	1005	875	872	719	827	821	712	799	865	801	810	738	885	548	476	374	314	218	174	679	883							YDR248C	0.000357745	0.000337065	0.000321146	0.000334453	0.000338369	0.000335219	0.000335094	0.000329315	0.000361874	0.000351618
		YDR249C	999	856	985	773	668	844	730	835	896	901	920	946	763	860	770	736	817	835	707	747	542	746	384	377	251	221	144	135	627	831							YDR249C	0.000353499	0.000319875	0.000341978	0.000338836	0.000327581	0.000338427	0.000319763	0.00034545	0.000350908	0.000315231
		YDR250C	892	843	870	697	681	815	770	858	930	979	884	820	744	784	749	626	789	843	736	854	699	757	528	407	314	275	171	160	623	788							YDR250C	0.000315637	0.000315017	0.000302051	0.000305522	0.000333956	0.000326799	0.000337285	0.000354965	0.000364223	0.000342521
		YDR251W	592	588	478	409	316	383	291	260	257	250	232	222	146	205	339	301	360	402	634	561	749	782	1182	831	602	360	122	100	626	825							YDR251W	0.000209481	0.000219727	0.000165955	0.000179281	0.000154963	0.000153575	0.000127467	0.000107565	0.000100651	8.74671e-05
		YDR252W	909	859	854	700	634	804	745	731	865	930	860	877	824	753	714	677	734	894	649	747	639	721	477	422	300	244	131	180	579	783							YDR252W	0.000321652	0.000320996	0.000296496	0.000306837	0.000310908	0.000322388	0.000326334	0.000302424	0.000338767	0.000325378
		YDR253C	847	822	854	699	674	808	761	795	828	903	817	893	757	781	718	655	812	847	697	834	694	875	593	458	419	345	220	231	712	772							YDR253C	0.000299713	0.00030717	0.000296496	0.000306399	0.000330523	0.000323992	0.000333342	0.000328901	0.000324276	0.000315931
		YDR254W	841	892	824	725	656	770	731	725	870	842	739	792	639	728	662	630	680	733	584	646	425	505	313	272	200	212	134	153	706	760							YDR254W	0.00029759	0.000333328	0.000286081	0.000317796	0.000321696	0.000308754	0.000320201	0.000299941	0.000340725	0.000294589
		YDR255C	406	444	513	418	328	371	405	387	474	468	432	402	353	418	442	401	381	387	181	211	91	83	43	20	46	39	25	36	370	453							YDR255C	0.000143664	0.000165916	0.000178106	0.000183226	0.000160848	0.000148764	0.000177403	0.000160107	0.000185636	0.000163738
		YDR256C	793	731	847	616	573	653	658	644	794	844	833	720	653	765	689	574	743	755	668	727	589	784	471	500	313	280	159	148	560	711							YDR256C	0.000280605	0.000273164	0.000294066	0.000270017	0.000280994	0.00026184	0.000288225	0.000266431	0.000310961	0.000295289
		YDR257C	720	681	730	572	561	616	579	606	673	710	629	679	506	639	553	517	547	578	420	336	117	154	66	59	56	72	51	40	650	689							YDR257C	0.000254774	0.00025448	0.000253445	0.00025073	0.000275109	0.000247004	0.00025362	0.00025071	0.000263572	0.000248407
		YDR258C	597	652	685	617	566	627	579	580	678	733	677	646	564	641	583	530	541	662	385	409	287	307	165	131	102	91	64	73	566	703							YDR258C	0.00021125	0.000243643	0.000237822	0.000270455	0.000277561	0.000251414	0.00025362	0.000239953	0.000265531	0.000256454
		YDR259C	1114	1037	1063	918	830	979	995	1012	1113	1148	1203	1074	1015	1147	956	903	1142	1230	1196	1312	1240	1534	1142	954	783	716	352	462	698	822							YDR259C	0.000394192	0.000387512	0.000369058	0.000402395	0.000407024	0.000392559	0.000435842	0.000418677	0.000435893	0.000401649
		YDR260C	0	0	0	0	0	0	0	0	1	0	0	0	0	0	0	0	0	0	0	0	0	0	0	1	0	1	0	0	1	0							YDR260C	0	0	0	0	0	0	0	0	3.91638e-07	0
		YDR261C	999	894	993	720	673	824	792	769	910	964	966	944	810	883	746	758	913	933	835	918	711	936	625	476	352	304	171	174	699	780							YDR261C	0.000353499	0.000334075	0.000344755	0.000315604	0.000330033	0.000330407	0.000346921	0.000318145	0.000356391	0.000337273
		YDR262W	0	0	0	0	0	0	0	0	0	0	0	0	0	0	0	0	0	0	0	0	0	0	0	0	0	0	0	0	0	0							YDR262W	0	0	0	0	0	0	0	0	0	0
		YDR263C	844	793	875	714	633	727	709	746	767	881	749	764	700	729	657	585	681	747	467	444	284	358	202	126	119	116	76	75	586	714							YDR263C	0.000298652	0.000296333	0.000303787	0.000312974	0.000310417	0.000291512	0.000310565	0.000308629	0.000300386	0.000308234
		YDR264C	0	0	0	0	0	0	0	0	0	0	0	0	0	0	0	0	0	0	0	0	0	0	0	0	0	0	0	0	0	0							YDR264C	0	0	0	0	0	0	0	0	0	0
		YDR265W	1108	933	1075	806	712	842	797	822	785	878	684	729	549	577	878	763	976	1103	902	950	1082	1269	1112	842	928	814	478	483	401	497							YDR265W	0.000392069	0.000348649	0.000373224	0.000353301	0.000349158	0.000337625	0.000349111	0.000340071	0.000307436	0.000307185
		YDR266C	0	0	0	0	0	0	0	0	0	0	0	0	0	0	0	0	0	0	0	0	0	0	0	0	0	0	0	0	0	0							YDR266C	0	0	0	0	0	0	0	0	0	0
		YDR268W	298	286	274	240	184	268	207	233	236	229	227	214	167	213	169	196	33	43	26	16	13	12	6	17	21	12	11	9	426	645							YDR268W	0.000105448	0.000106874	9.51288e-05	0.000105201	9.02319e-05	0.000107463	9.06726e-05	9.6395e-05	9.24266e-05	8.01199e-05
		YDR269C	816	846	841	662	589	693	649	683	719	785	732	721	614	666	601	577	651	601	565	586	360	416	233	168	200	171	120	111	605	784							YDR269C	0.000288744	0.000316138	0.000291983	0.000290181	0.00028884	0.000277879	0.000284283	0.000282565	0.000281588	0.000274647
		YDR270W	15	31	36	32	30	53	39	52	18	53	29	32	24	34	23	23	13	23	10	15	2	3	0	1	1	4	1	0	10	3							YDR270W	5.30779e-06	1.15843e-05	1.24987e-05	1.40269e-05	1.47117e-05	2.12519e-05	1.70832e-05	2.1513e-05	7.04949e-06	1.8543e-05
		YDR271C	722	827	870	733	561	754	679	743	754	845	691	763	568	707	704	601	588	621	619	644	384	455	241	131	156	148	112	116	560	663							YDR271C	0.000255482	0.000309038	0.000302051	0.000321303	0.000275109	0.000302339	0.000297424	0.000307388	0.000295295	0.000295639
		YDR272W	846	863	871	737	635	803	807	733	823	968	801	800	671	788	689	655	830	863	700	820	626	804	454	399	306	273	167	176	576	680							YDR272W	0.00029936	0.000322491	0.000302398	0.000323056	0.000311398	0.000321987	0.000353492	0.000303251	0.000322318	0.000338673
		YDR273W	865	820	924	680	666	765	796	783	868	1053	963	831	742	923	667	658	833	862	803	834	675	758	545	375	335	277	175	157	489	506							YDR273W	0.000306083	0.000306422	0.000320799	0.000298071	0.0003266	0.00030675	0.000348673	0.000323937	0.000339942	0.000368411
		YDR274C	0	0	0	0	0	0	0	0	0	0	0	0	0	0	0	0	0	0	0	0	0	0	0	0	0	0	0	0	0	0							YDR274C	0	0	0	0	0	0	0	0	0	0
		YDR275W	1066	897	946	798	711	870	918	934	973	1126	932	961	868	921	777	749	971	1035	855	989	785	903	632	517	415	330	212	236	541	665							YDR275W	0.000377207	0.000335196	0.000328437	0.000349795	0.000348668	0.000348852	0.000402113	0.000386407	0.000381064	0.000393952
		YDR276C	706	755	670	573	475	553	543	559	607	664	619	660	494	588	569	435	579	580	659	710	937	984	654	638	574	446	286	287	663	812							YDR276C	0.00024982	0.000282133	0.000232614	0.000251168	0.000232936	0.000221742	0.000237851	0.000231265	0.000237724	0.000232313
		YDR277C	0	0	0	0	0	0	0	0	0	0	0	0	0	0	0	0	0	0	0	0	0	0	0	0	0	0	0	0	0	0							YDR277C	0	0	0	0	0	0	0	0	0	0
		YDR278C	0	0	0	0	0	0	0	0	0	0	0	0	0	0	0	0	0	0	0	0	0	0	0	0	0	0	0	0	0	0							YDR278C	0	0	0	0	0	0	0	0	0	0
		YDR279W	0	0	0	0	0	0	0	0	0	0	0	0	0	0	0	0	0	0	0	0	0	0	0	0	0	0	0	0	0	0							YDR279W	0	0	0	0	0	0	0	0	0	0
		YDR281C	0	0	2	0	0	0	0	0	1	0	0	0	0	1	0	0	0	1	0	2	0	0	0	0	0	0	0	0	0	3							YDR281C	0	0	6.94371e-07	0	0	0	0	0	3.91638e-07	0
		YDR282C	1	0	0	0	0	0	0	0	0	0	0	0	0	0	0	0	0	0	0	0	0	0	0	0	0	0	0	0	0	0							YDR282C	3.53853e-07	0	0	0	0	0	0	0	0	0
		YDR283C	0	0	0	0	0	0	0	0	0	1	0	0	0	0	0	0	0	0	0	0	0	0	0	0	0	0	0	0	0	0							YDR283C	0	0	0	0	0	0	0	0	0	3.49868e-07
		YDR284C	902	882	899	717	634	894	765	713	829	828	774	715	682	734	745	705	814	815	852	866	832	1136	1248	860	1105	797	723	636	614	758							YDR284C	0.000319175	0.000329591	0.00031212	0.000314289	0.000310908	0.000358476	0.000335094	0.000294977	0.000324668	0.000289691
		YDR285W	0	0	0	0	0	0	0	0	0	0	0	0	0	0	0	0	0	0	0	0	0	0	0	0	0	0	0	0	2	0							YDR285W	0	0	0	0	0	0	0	0	0	0
		YDR286C	991	1001	975	847	785	933	825	866	1059	1071	1007	1021	860	986	888	847	993	968	881	858	822	911	520	476	362	300	183	182	749	886							YDR286C	0.000350668	0.000374059	0.000338506	0.000371273	0.000384957	0.000374114	0.000361376	0.000358275	0.000414745	0.000374709
		YDR287W	2	1	0	0	0	2	2	2	6	2	3	4	3	1	1	0	3	0	2	1	2	0	2	1	1	1	1	0	1	0							YDR287W	7.07706e-07	3.73686e-07	0	0	0	8.0196e-07	8.76064e-07	8.27424e-07	2.34983e-06	6.99737e-07
		YDR289C	369	338	337	248	243	269	253	261	302	309	331	330	294	278	216	218	167	168	133	158	237	261	396	290	438	450	348	310	472	553							YDR289C	0.000130572	0.000126306	0.000117001	0.000108708	0.000119165	0.000107864	0.000110822	0.000107979	0.000118275	0.000108109
		YDR290W	386	392	424	313	276	298	357	309	380	373	344	362	332	354	315	275	184	174	166	194	204	251	453	304	514	416	381	315	552	739							YDR290W	0.000136587	0.000146485	0.000147207	0.0001372	0.000135348	0.000119492	0.000156377	0.000127837	0.000148822	0.000130501
		YDR291W	0	0	0	0	0	0	0	0	0	0	0	0	0	0	0	0	0	0	0	0	0	0	0	0	0	0	0	0	0	0							YDR291W	0	0	0	0	0	0	0	0	0	0
		YDR293C	0	0	0	0	0	0	0	0	0	0	0	0	0	0	0	0	0	0	0	0	0	0	0	0	0	0	0	0	0	0							YDR293C	0	0	0	0	0	0	0	0	0	0
		YDR294C	0	0	0	0	0	0	0	0	0	0	0	0	0	0	0	0	0	0	0	0	0	0	0	0	0	0	0	0	0	0							YDR294C	0	0	0	0	0	0	0	0	0	0
		YDR295C	719	762	736	572	553	741	536	607	671	654	659	712	599	647	462	483	647	680	963	999	1374	1797	2921	2315	5004	4321	5352	5093	658	761							YDR295C	0.00025442	0.000284749	0.000255528	0.00025073	0.000271186	0.000297126	0.000234785	0.000251123	0.000262789	0.000228814
		YDR296W	0	0	0	0	0	0	0	0	0	0	0	0	0	0	0	0	0	0	0	0	0	0	0	0	0	0	0	0	0	0							YDR296W	0	0	0	0	0	0	0	0	0	0
		YDR297W	0	0	0	0	0	0	0	0	0	0	0	0	0	0	0	0	0	0	0	0	0	0	0	0	0	0	0	0	0	0							YDR297W	0	0	0	0	0	0	0	0	0	0
		YDR298C	268	275	228	224	154	180	168	157	159	191	167	137	99	116	124	159	20	33	19	5	8	19	6	11	14	11	12	8	584	663							YDR298C	9.48326e-05	0.000102764	7.91583e-05	9.8188e-05	7.55201e-05	7.21764e-05	7.35894e-05	6.49528e-05	6.22705e-05	6.68249e-05
		YDR300C	0	0	0	0	0	0	0	0	0	0	0	0	0	0	0	0	0	0	0	0	0	0	0	0	0	0	0	0	1	0							YDR300C	0	0	0	0	0	0	0	0	0	0
		YDR304C	920	860	977	769	674	765	861	753	884	961	859	898	679	890	815	652	826	777	735	754	729	843	542	450	330	295	218	204	645	699							YDR304C	0.000325545	0.00032137	0.0003392	0.000337083	0.000330523	0.00030675	0.000377145	0.000311525	0.000346208	0.000336224
		YDR305C	771	738	776	637	567	726	613	705	726	824	702	773	617	763	569	541	718	753	701	756	654	873	491	462	295	252	150	167	591	714							YDR305C	0.000272821	0.00027578	0.000269416	0.000279222	0.000278051	0.000291111	0.000268514	0.000291667	0.000284329	0.000288292
		YDR306C	907	877	955	763	708	881	796	812	944	975	942	942	836	864	730	725	832	933	677	786	695	809	547	511	330	293	223	173	624	672							YDR306C	0.000320945	0.000327722	0.000331562	0.000334453	0.000347197	0.000353263	0.000348673	0.000335934	0.000369706	0.000341122
		YDR307W	947	889	943	760	704	773	786	855	945	997	941	909	827	921	764	705	923	923	853	907	814	945	589	433	409	362	178	190	640	647							YDR307W	0.000335099	0.000332207	0.000327396	0.000333138	0.000345235	0.000309957	0.000344293	0.000353724	0.000370098	0.000348819
		YDR309C	774	800	818	725	672	794	731	671	803	890	792	818	674	845	615	562	708	839	654	744	477	570	381	182	262	265	141	191	463	568							YDR309C	0.000273882	0.000298949	0.000283998	0.000317796	0.000329542	0.000318378	0.000320201	0.000277601	0.000314485	0.000311383
		YDR310C	858	842	887	700	720	842	709	763	878	1013	887	876	764	866	666	708	569	616	584	777	1141	1331	2320	1934	3867	3559	5349	4675	506	562							YDR310C	0.000303606	0.000314643	0.000307953	0.000306837	0.000353081	0.000337625	0.000310565	0.000315662	0.000343858	0.000354417
		YDR312W	797	779	805	649	584	754	707	669	811	891	796	837	675	718	623	521	759	910	655	775	575	712	406	297	251	223	116	144	559	741							YDR312W	0.000282021	0.000291101	0.000279484	0.000284482	0.000286388	0.000302339	0.000309689	0.000276773	0.000317618	0.000311733
		YDR313C	825	827	946	664	612	739	731	797	819	927	871	837	762	790	685	547	1017	1010	854	937	760	889	547	478	342	345	242	198	622	673							YDR313C	0.000291929	0.000309038	0.000328437	0.000291057	0.000300119	0.000296324	0.000320201	0.000329729	0.000320752	0.000324328
		YDR314C	830	797	801	742	677	772	683	723	850	944	847	811	754	856	730	674	735	852	761	731	622	761	518	443	312	283	151	172	635	795							YDR314C	0.000293698	0.000297828	0.000278095	0.000325248	0.000331994	0.000309556	0.000299176	0.000299114	0.000332892	0.000330276
		YDR315C	0	0	0	0	0	0	0	0	0	0	0	0	0	0	0	0	0	0	0	0	0	1	0	0	0	0	0	0	0	0							YDR315C	0	0	0	0	0	0	0	0	0	0
		YDR316W	636	599	671	532	490	591	551	606	660	650	601	648	578	584	493	458	422	399	306	364	201	204	130	81	109	74	55	54	594	693							YDR316W	0.00022505	0.000223838	0.000232961	0.000233196	0.000240291	0.000236979	0.000241356	0.00025071	0.000258481	0.000227415
		YDR317W	0	0	0	0	0	0	0	0	0	0	0	0	0	0	0	0	0	0	0	0	0	0	0	0	0	0	0	0	0	0							YDR317W	0	0	0	0	0	0	0	0	0	0
		YDR318W	0	0	0	0	0	0	0	0	0	0	0	0	0	0	0	0	0	0	0	0	0	0	0	0	0	0	0	0	0	0							YDR318W	0	0	0	0	0	0	0	0	0	0
		YDR319C	837	779	940	696	645	745	689	773	812	983	883	827	749	777	725	634	792	861	688	781	623	719	447	381	257	290	136	239	553	741							YDR319C	0.000296175	0.000291101	0.000326354	0.000305084	0.000316302	0.00029873	0.000301804	0.0003198	0.00031801	0.000343921
		YDR320C	0	0	0	0	0	0	0	0	0	0	0	0	0	0	0	0	0	0	0	0	0	0	0	0	0	0	0	0	0	0							YDR320C	0	0	0	0	0	0	0	0	0	0
		YDR321W	931	852	954	811	700	811	677	872	908	1033	977	877	774	859	772	723	801	895	789	851	738	818	689	453	520	453	261	268	707	872							YDR321W	0.000329437	0.00031838	0.000331215	0.000355493	0.000343273	0.000325195	0.000296548	0.000360757	0.000355607	0.000361414
		YDR322C-A	0	0	0	0	0	0	0	0	0	0	0	0	0	0	0	0	0	0	0	0	0	0	0	0	0	0	0	0	0	0							YDR322C-A	0	0	0	0	0	0	0	0	0	0
		YDR322W	296	318	327	284	203	276	245	254	202	262	193	182	163	193	207	200	29	34	22	13	17	24	13	13	15	18	8	19	589	733							YDR322W	0.00010474	0.000118832	0.00011353	0.000124488	9.95493e-05	0.00011067	0.000107318	0.000105083	7.91109e-05	9.16655e-05
		YDR323C	198	213	205	149	151	183	135	174	130	173	158	115	122	137	92	103	182	166	374	427	388	442	144	108	69	56	26	24	542	565							YDR323C	7.00629e-05	7.95951e-05	7.1173e-05	6.53125e-05	7.4049e-05	7.33793e-05	5.91343e-05	7.19859e-05	5.09129e-05	6.05272e-05
		YDR326C	678	577	672	535	478	548	532	538	648	690	576	608	513	561	468	547	472	529	306	357	228	233	160	163	152	90	65	75	593	631							YDR326C	0.000239912	0.000215617	0.000233309	0.000234512	0.000234407	0.000219737	0.000233033	0.000222577	0.000253781	0.000241409
		YDR329C	1109	1037	1200	879	850	832	844	796	832	879	789	737	518	644	1004	919	1017	1097	858	843	972	1204	859	772	596	683	386	333	484	576							YDR329C	0.000392423	0.000387512	0.000416622	0.0003853	0.000416832	0.000333615	0.000369699	0.000329315	0.000325843	0.000307534
		YDR330W	1836	1581	1802	1378	1285	1586	1461	1609	1675	1749	1758	1674	1398	1618	1340	1230	1757	1809	1619	1751	1597	1925	1292	1132	923	761	488	582	1164	1310							YDR330W	0.000649674	0.000590797	0.000625628	0.000604031	0.000630152	0.000635954	0.000639965	0.000665663	0.000655994	0.00061192
		YDR332W	7	5	11	13	5	1	6	7	11	6	5	6	5	8	5	5	11	10	3	11	7	4	5	3	1	3	3	3	2	8							YDR332W	2.47697e-06	1.86843e-06	3.81904e-06	5.69841e-06	2.45195e-06	4.0098e-07	2.62819e-06	2.89599e-06	4.30802e-06	2.09921e-06
		YDR333C	871	754	782	650	635	683	666	655	765	792	803	765	651	733	622	516	551	584	394	420	330	439	296	282	207	170	86	115	513	662							YDR333C	0.000308206	0.000281759	0.000271499	0.000284921	0.000311398	0.000273869	0.000291729	0.000270982	0.000299603	0.000277096
		YDR334W	684	647	606	533	418	552	510	544	528	559	464	492	404	418	424	393	751	848	1113	1126	981	1111	604	545	367	403	275	280	583	573							YDR334W	0.000242035	0.000241775	0.000210394	0.000233635	0.000204983	0.000221341	0.000223396	0.000225059	0.000206785	0.000195576
		YDR335W	862	855	825	754	659	852	782	907	912	959	968	961	776	921	669	625	258	314	196	295	452	617	1244	1114	2741	2464	3322	2907	412	494							YDR335W	0.000305021	0.000319501	0.000286428	0.000330508	0.000323167	0.000341635	0.000342541	0.000375237	0.000357174	0.000335524
		YDR336W	201	277	326	250	195	275	300	275	235	323	264	300	245	300	255	204	208	245	221	256	120	105	62	17	48	53	33	37	128	165							YDR336W	7.11244e-05	0.000103511	0.000113182	0.000109585	9.56262e-05	0.000110269	0.00013141	0.000113771	9.20349e-05	0.000113008
		YDR337W	0	0	0	0	0	0	0	0	0	0	0	0	0	0	0	0	0	0	0	0	0	0	0	0	0	0	0	0	0	0							YDR337W	0	0	0	0	0	0	0	0	0	0
		YDR338C	692	655	630	525	504	577	547	610	645	696	613	612	553	669	525	482	606	633	470	556	450	635	412	390	277	236	161	128	438	535							YDR338C	0.000244866	0.000244764	0.000218727	0.000230128	0.000247157	0.000231365	0.000239603	0.000252364	0.000252607	0.000243508
		YDR340W	0	0	0	0	0	0	0	0	0	0	0	0	0	0	0	0	0	0	0	0	0	0	0	0	0	0	0	0	0	0							YDR340W	0	0	0	0	0	0	0	0	0	0
		YDR344C	1050	994	1055	845	782	1014	861	867	1078	1061	1060	1064	891	959	801	793	1006	964	750	835	715	854	506	565	372	343	143	178	553	713							YDR344C	0.000371546	0.000371444	0.000366281	0.000370397	0.000383485	0.000406594	0.000377145	0.000358689	0.000422186	0.00037121
		YDR345C	1011	1001	989	778	736	901	902	822	980	1090	932	928	771	890	797	721	961	985	1082	1058	892	1064	643	575	483	431	281	330	574	798							YDR345C	0.000357745	0.000374059	0.000343366	0.000341028	0.000360927	0.000361283	0.000395105	0.000340071	0.000383805	0.000381357
		YDR346C	219	285	310	306	245	343	329	402	248	416	346	329	293	355	244	271	306	381	334	343	168	126	185	36	168	163	103	115	82	79							YDR346C	7.74938e-05	0.0001065	0.000107627	0.000134132	0.000120146	0.000137536	0.000144112	0.000166312	9.71262e-05	0.000145545
		YDR347W	0	0	0	0	0	0	0	0	0	0	0	0	0	0	0	0	0	0	0	1	0	0	0	0	0	0	0	0	0	0							YDR347W	0	0	0	0	0	0	0	0	0	0
		YDR348C	4	2	1	2	0	0	1	0	1	0	0	1	0	0	1	3	3	2	0	1	2	3	1	5	0	0	1	1	0	0							YDR348C	1.41541e-06	7.47372e-07	3.47185e-07	8.76679e-07	0	0	4.38032e-07	0	3.91638e-07	0
		YDR349C	598	510	505	409	384	470	379	422	452	503	437	501	380	415	335	338	156	206	72	106	66	68	65	73	59	45	33	43	507	563							YDR349C	0.000211604	0.00019058	0.000175329	0.000179281	0.00018831	0.000188461	0.000166014	0.000174587	0.00017702	0.000175984
		YDR350C	0	0	0	0	0	0	0	0	0	0	0	0	0	0	0	0	0	0	0	0	0	0	0	0	0	0	0	0	0	0							YDR350C	0	0	0	0	0	0	0	0	0	0
		YDR351W	0	0	0	0	2	0	0	0	0	0	0	0	0	0	0	0	0	1	0	0	0	0	0	0	0	0	0	0	0	1							YDR351W	0	0	0	0	9.80781e-07	0	0	0	0	0
		YDR352W	3	2	1	0	0	1	0	0	0	0	1	1	0	0	2	1	0	0	2	0	2	2	1	1	0	0	0	0	1	0							YDR352W	1.06156e-06	7.47372e-07	3.47185e-07	0	0	4.0098e-07	0	0	0	0
		YDR354W	829	769	892	635	615	733	639	665	753	766	733	738	605	586	644	588	878	799	713	747	766	892	694	627	552	477	254	280	548	640							YDR354W	0.000293344	0.000287364	0.000309689	0.000278345	0.00030159	0.000293918	0.000279902	0.000275119	0.000294903	0.000267999
		YDR357C	0	0	3	2	0	1	1	0	3	6	1	1	0	1	2	0	0	1	0	0	1	0	0	1	0	0	0	0	2	0							YDR357C	0	0	1.04156e-06	8.76679e-07	0	4.0098e-07	4.38032e-07	0	1.17491e-06	2.09921e-06
		YDR358W	97	183	211	191	136	195	232	237	132	298	201	187	215	215	164	141	98	227	130	132	53	43	31	7	25	32	16	12	31	30							YDR358W	3.43237e-05	6.83845e-05	7.32561e-05	8.37228e-05	6.66931e-05	7.81911e-05	0.000101623	9.80498e-05	5.16962e-05	0.000104261
		YDR359C	0	0	0	0	0	0	0	0	0	0	0	0	0	0	0	0	0	0	0	0	0	0	0	0	0	0	0	0	0	0							YDR359C	0	0	0	0	0	0	0	0	0	0
		YDR360W	656	661	646	501	461	593	534	528	612	627	605	578	476	574	547	496	865	925	1194	1298	1049	1129	718	585	522	457	317	334	590	743							YDR360W	0.000232128	0.000247006	0.000224282	0.000219608	0.00022607	0.000237781	0.000233909	0.00021844	0.000239682	0.000219368
		YDR363W	0	0	0	0	0	0	0	0	0	0	0	0	0	0	0	0	0	0	0	0	0	0	0	0	0	0	0	0	0	0							YDR363W	0	0	0	0	0	0	0	0	0	0
		YDR363W-A	973	889	785	775	713	776	715	725	781	813	741	804	620	708	759	701	1685	1799	3496	3540	5116	6391	9777	8947	14190	13402	12711	13141	508	699							YDR363W-A	0.000344299	0.000332207	0.00027254	0.000339713	0.000349648	0.00031116	0.000313193	0.000299941	0.000305869	0.000284443
		YDR364C	72	74	52	29	15	17	16	22	14	16	6	8	4	4	17	18	1	3	1	3	0	1	1	1	0	0	0	0	812	929							YDR364C	2.54774e-05	2.76527e-05	1.80536e-05	1.27118e-05	7.35586e-06	6.81666e-06	7.00851e-06	9.10167e-06	5.48293e-06	5.5979e-06
		YDR368W	0	0	0	0	1	1	0	0	0	0	0	0	0	0	0	0	0	0	0	0	0	0	0	0	0	0	0	0	0	0							YDR368W	0	0	0	0	4.90391e-07	4.0098e-07	0	0	0	0
		YDR369C	119	125	107	89	61	84	74	83	63	70	61	58	47	49	56	62	38	52	27	59	21	42	42	18	49	40	41	41	212	261							YDR369C	4.21085e-05	4.67107e-05	3.71488e-05	3.90122e-05	2.99138e-05	3.36823e-05	3.24144e-05	3.43381e-05	2.46732e-05	2.44908e-05
		YDR370C	760	700	667	560	551	579	521	594	626	605	578	606	597	604	536	521	550	564	571	617	573	683	505	423	387	332	259	218	574	722							YDR370C	0.000268928	0.00026158	0.000231573	0.00024547	0.000270205	0.000232167	0.000228215	0.000245745	0.000245165	0.00021167
		YDR371W	755	721	782	642	580	649	649	648	710	763	781	702	649	738	646	627	770	744	701	702	635	856	491	438	363	281	135	174	628	776							YDR371W	0.000267159	0.000269427	0.000271499	0.000281414	0.000284427	0.000260236	0.000284283	0.000268086	0.000278063	0.00026695
		YDR372C	403	404	419	307	237	316	264	291	255	339	273	296	236	343	243	213	270	251	252	312	307	292	249	251	187	201	111	148	598	671							YDR372C	0.000142603	0.000150969	0.000145471	0.00013457	0.000116223	0.00012671	0.00011564	0.00012039	9.98677e-05	0.000118605
		YDR374C	0	0	0	0	0	0	0	0	0	0	0	0	0	0	0	0	0	0	0	0	0	0	0	0	0	0	0	0	0	0							YDR374C	0	0	0	0	0	0	0	0	0	0
		YDR375C	236	234	234	207	175	194	189	233	191	214	188	208	137	190	140	139	40	39	14	19	22	21	8	6	10	15	10	15	417	546							YDR375C	8.35093e-05	8.74425e-05	8.12414e-05	9.07362e-05	8.58183e-05	7.77901e-05	8.2788e-05	9.6395e-05	7.48029e-05	7.48719e-05
		YDR377W	0	0	0	0	0	0	0	0	0	0	0	0	0	0	0	0	0	0	0	0	0	0	0	0	0	0	0	0	0	0							YDR377W	0	0	0	0	0	0	0	0	0	0
		YDR378C	371	318	366	254	185	243	167	179	136	168	138	140	88	111	213	205	173	192	311	302	480	583	874	789	1117	1076	735	691	503	608							YDR378C	0.000131279	0.000118832	0.00012707	0.000111338	9.07223e-05	9.74381e-05	7.31513e-05	7.40545e-05	5.32628e-05	5.87779e-05
		YDR379C-A	0	0	0	0	0	0	0	0	0	0	0	0	0	0	0	0	0	0	0	0	0	0	0	0	0	0	0	0	0	0							YDR379C-A	0	0	0	0	0	0	0	0	0	0
		YDR379W	924	875	929	861	772	891	888	887	997	957	946	888	906	916	887	733	922	916	869	858	754	855	529	501	347	336	193	226	679	887							YDR379W	0.00032696	0.000326975	0.000322535	0.00037741	0.000378582	0.000357273	0.000388972	0.000366963	0.000390463	0.000334824
		YDR380W	838	870	970	723	675	777	747	780	887	865	946	813	770	898	785	731	905	889	881	860	698	819	562	526	365	329	216	197	736	961							YDR380W	0.000296529	0.000325107	0.00033677	0.000316919	0.000331014	0.000311561	0.00032721	0.000322696	0.000347383	0.000302636
		YDR382W	221	221	190	115	97	127	98	95	44	67	38	58	38	41	90	82	104	92	156	159	155	200	153	133	180	188	127	93	569	589							YDR382W	7.82015e-05	8.25846e-05	6.59652e-05	5.0409e-05	4.75679e-05	5.09244e-05	4.29271e-05	3.93027e-05	1.72321e-05	2.34412e-05
		YDR383C	706	724	768	600	570	690	690	710	684	872	672	805	697	709	620	573	717	821	671	770	595	632	428	189	252	218	119	153	437	483							YDR383C	0.00024982	0.000270549	0.000266638	0.000263004	0.000279523	0.000276676	0.000302242	0.000293736	0.00026788	0.000305085
		YDR384C	0	0	0	0	0	0	0	0	0	0	0	0	0	0	0	1	0	0	0	0	0	0	0	0	0	0	0	0	0	0							YDR384C	0	0	0	0	0	0	0	0	0	0
		YDR385W	0	0	0	0	0	0	0	0	0	0	0	0	0	0	0	0	0	0	0	0	0	0	0	0	0	0	0	0	0	0							YDR385W	0	0	0	0	0	0	0	0	0	0
		YDR386W	46	51	48	37	45	42	46	51	57	47	37	48	40	39	42	30	49	33	39	39	32	41	31	30	35	26	7	11	38	45							YDR386W	1.62772e-05	1.9058e-05	1.66649e-05	1.62186e-05	2.20676e-05	1.68412e-05	2.01495e-05	2.10993e-05	2.23234e-05	1.64438e-05
		YDR387C	523	572	617	490	480	572	478	536	504	702	574	613	554	554	473	465	521	615	524	561	383	385	269	132	184	194	112	108	245	290							YDR387C	0.000185065	0.000213748	0.000214213	0.000214786	0.000235387	0.00022936	0.000209379	0.00022175	0.000197386	0.000245608
		YDR388W	374	364	315	246	217	262	176	223	251	250	241	253	198	214	162	156	120	128	104	114	40	42	23	22	25	38	23	13	591	702							YDR388W	0.000132341	0.000136022	0.000109363	0.000107831	0.000106415	0.000105057	7.70936e-05	9.22578e-05	9.83012e-05	8.74671e-05
		YDR389W	328	339	378	368	266	327	337	345	253	389	372	335	277	332	296	246	246	292	165	206	106	125	96	15	65	79	76	49	241	275							YDR389W	0.000116064	0.000126679	0.000131236	0.000161309	0.000130444	0.00013112	0.000147617	0.000142731	9.90844e-05	0.000136099
		YDR391C	5	1	2	2	2	2	3	0	0	0	2	0	2	3	1	2	1	3	2	1	3	2	1	2	2	0	0	1	0	2							YDR391C	1.76926e-06	3.73686e-07	6.94371e-07	8.76679e-07	9.80781e-07	8.0196e-07	1.3141e-06	0	0	0
		YDR392W	0	0	2	1	1	2	3	1	0	5	0	1	0	0	0	0	0	0	0	0	0	0	0	0	0	0	0	0	0	0							YDR392W	0	0	6.94371e-07	4.38339e-07	4.90391e-07	8.0196e-07	1.3141e-06	4.13712e-07	0	1.74934e-06
		YDR393W	344	361	339	213	187	249	188	212	218	240	227	205	128	151	197	183	149	112	139	125	98	114	61	49	44	42	30	36	555	617							YDR393W	0.000121725	0.000134901	0.000117696	9.33663e-05	9.1703e-05	9.9844e-05	8.235e-05	8.7707e-05	8.53771e-05	8.39684e-05
		YDR395W	734	729	745	583	462	618	479	555	568	635	513	532	469	494	488	469	612	582	560	619	327	391	125	139	72	70	48	44	533	705							YDR395W	0.000259728	0.000272417	0.000258653	0.000255552	0.00022656	0.000247806	0.000209817	0.00022961	0.00022245	0.000222166
		YDR399W	710	682	707	582	464	558	540	510	614	712	633	549	550	540	515	543	691	643	550	647	733	927	833	827	860	796	609	687	488	633							YDR399W	0.000251236	0.000254854	0.00024546	0.000255113	0.000227541	0.000223747	0.000236537	0.000210993	0.000240466	0.000249106
		YDR400W	837	793	955	701	610	781	694	808	816	958	844	809	739	872	696	654	826	832	681	813	669	867	438	413	343	299	168	184	588	662							YDR400W	0.000296175	0.000296333	0.000331562	0.000307276	0.000299138	0.000313165	0.000303994	0.000334279	0.000319577	0.000335174
		YDR401W	0	0	0	0	0	0	0	0	0	0	0	0	0	0	0	0	0	0	0	0	0	0	0	0	0	0	0	0	0	0							YDR401W	0	0	0	0	0	0	0	0	0	0
		YDR402C	814	776	896	688	600	744	713	726	906	933	811	816	768	831	595	634	797	813	635	770	634	827	500	402	289	285	171	167	586	648							YDR402C	0.000288036	0.00028998	0.000311078	0.000301577	0.000294234	0.000298329	0.000312317	0.000300355	0.000354824	0.000326427
		YDR403W	806	798	756	642	623	709	680	646	765	815	739	760	698	747	623	594	747	801	627	704	639	816	523	453	345	305	199	180	576	645							YDR403W	0.000285205	0.000298201	0.000262472	0.000281414	0.000305513	0.000284295	0.000297862	0.000267258	0.000299603	0.000285143
		YDR405W	346	275	244	246	193	223	211	190	168	237	178	190	124	178	204	170	27	29	17	20	26	10	13	16	8	7	9	12	476	626							YDR405W	0.000122433	0.000102764	8.47132e-05	0.000107831	9.46454e-05	8.94185e-05	9.24247e-05	7.86053e-05	6.57952e-05	8.29188e-05
		YDR406W	839	828	782	684	704	755	747	655	851	906	839	806	727	743	732	694	796	754	635	778	596	722	443	360	291	250	161	180	564	699							YDR406W	0.000296883	0.000309412	0.000271499	0.000299824	0.000345235	0.00030274	0.00032721	0.000270982	0.000333284	0.000316981
		YDR408C	0	1	2	2	3	1	0	4	3	7	0	1	0	0	0	2	0	1	2	1	0	0	0	0	0	0	0	0	0	0							YDR408C	0	3.73686e-07	6.94371e-07	8.76679e-07	1.47117e-06	4.0098e-07	0	1.65485e-06	1.17491e-06	2.44908e-06
		YDR409W	712	643	760	566	480	609	531	612	638	658	653	638	555	639	527	501	666	680	655	575	594	710	524	514	472	405	382	341	558	676							YDR409W	0.000251943	0.00024028	0.000263861	0.0002481	0.000235387	0.000244197	0.000232595	0.000253192	0.000249865	0.000230213
		YDR410C	897	814	1027	739	704	833	813	828	855	914	875	941	737	781	704	681	832	837	682	689	787	902	793	756	775	599	408	399	563	720							YDR410C	0.000317406	0.00030418	0.000356559	0.000323933	0.000345235	0.000334016	0.00035612	0.000342554	0.000334851	0.00031978
		YDR411C	748	799	794	670	566	695	714	712	708	784	808	784	670	781	634	604	751	788	631	759	609	782	504	479	333	276	161	226	660	834							YDR411C	0.000264682	0.000298575	0.000275665	0.000293687	0.000277561	0.000278681	0.000312755	0.000294563	0.00027728	0.000274297
		YDR414C	512	512	435	336	242	376	341	333	351	407	335	375	259	336	284	276	304	372	336	323	327	411	460	480	1095	973	1324	1368	500	683							YDR414C	0.000181173	0.000191327	0.000151026	0.000147282	0.000118675	0.000150768	0.000149369	0.000137766	0.000137465	0.000142396
		YDR415C	776	776	829	705	615	734	722	737	794	884	808	831	739	732	674	604	759	799	671	743	547	658	399	354	208	185	111	132	496	677							YDR415C	0.00027459	0.00028998	0.000287817	0.000309029	0.00030159	0.000294319	0.000316259	0.000304906	0.000310961	0.000309284
		YDR417C	464	438	384	303	221	286	232	269	192	245	170	149	114	131	234	179	368	381	786	827	1050	1244	1289	1011	911	836	410	480	540	705							YDR417C	0.000164188	0.000163674	0.000133319	0.000132817	0.000108376	0.00011468	0.000101623	0.000111289	7.51945e-05	8.57178e-05
		YDR418W	0	0	0	0	0	0	0	0	0	0	0	0	0	0	0	0	0	0	0	0	0	0	0	0	0	0	0	0	0	0							YDR418W	0	0	0	0	0	0	0	0	0	0
		YDR419W	0	0	0	0	0	0	0	0	0	0	0	0	0	1	0	0	0	1	0	0	0	0	0	0	0	0	0	0	0	0							YDR419W	0	0	0	0	0	0	0	0	0	0
		YDR420W	0	0	0	0	0	0	0	0	0	0	0	0	0	0	0	0	0	0	0	0	0	0	0	0	0	0	0	0	0	0							YDR420W	0	0	0	0	0	0	0	0	0	0
		YDR421W	849	785	877	704	693	799	740	732	869	873	902	803	784	809	746	739	888	891	867	935	758	998	564	486	351	322	211	191	554	785							YDR421W	0.000300421	0.000293343	0.000304482	0.000308591	0.000339841	0.000320383	0.000324144	0.000302837	0.000340333	0.000305435
		YDR422C	4	1	10	2	1	2	1	2	3	5	6	6	1	3	0	0	0	3	1	1	0	0	0	0	1	0	0	0	3	3							YDR422C	1.41541e-06	3.73686e-07	3.47185e-06	8.76679e-07	4.90391e-07	8.0196e-07	4.38032e-07	8.27424e-07	1.17491e-06	1.74934e-06
		YDR423C	0	2	0	2	0	0	0	1	0	0	2	1	1	0	2	0	1	0	1	0	0	0	1	0	0	0	0	0	0	1							YDR423C	0	7.47372e-07	0	8.76679e-07	0	0	0	4.13712e-07	0	0
		YDR424C	746	654	744	574	522	585	566	616	684	773	693	659	602	611	536	515	694	720	566	569	564	645	382	398	291	229	117	129	532	708							YDR424C	0.000263974	0.000244391	0.000258306	0.000251607	0.000255984	0.000234573	0.000247926	0.000254847	0.00026788	0.000270448
		YDR425W	616	538	552	452	390	534	535	478	534	652	618	585	516	538	437	435	458	446	408	448	426	485	275	256	176	167	96	107	485	563							YDR425W	0.000217973	0.000201043	0.000191646	0.000198129	0.000191252	0.000214123	0.000234347	0.000197754	0.000209135	0.000228114
		YDR426C	786	748	840	636	600	766	637	711	707	783	728	746	668	677	633	615	699	664	603	642	554	713	421	303	246	178	135	134	634	754							YDR426C	0.000278128	0.000279517	0.000291636	0.000278784	0.000294234	0.000307151	0.000279026	0.000294149	0.000276888	0.000273947
		YDR428C	873	797	869	631	581	716	659	701	756	776	789	738	642	787	657	632	828	787	641	803	635	810	592	512	339	306	210	183	503	604							YDR428C	0.000308914	0.000297828	0.000301704	0.000276592	0.000284917	0.000287102	0.000288663	0.000290012	0.000296078	0.000271498
		YDR430C	978	984	1008	765	722	892	849	855	976	1018	970	931	900	929	826	855	1070	1055	1009	1089	966	1287	990	849	778	582	366	424	654	808							YDR430C	0.000346068	0.000367707	0.000349963	0.00033533	0.000354062	0.000357674	0.000371889	0.000353724	0.000382239	0.000356166
		YDR431W	881	848	851	664	597	713	615	691	683	779	735	700	652	726	647	617	895	996	1125	1193	1205	1462	1150	1097	947	890	553	710	514	642							YDR431W	0.000311744	0.000316886	0.000295455	0.000291057	0.000292763	0.000285899	0.00026939	0.000285875	0.000267489	0.000272548
		YDR432W	0	0	0	0	0	0	0	0	1	0	0	0	0	0	0	0	0	0	0	0	0	0	0	0	0	0	0	0	0	0							YDR432W	0	0	0	0	0	0	0	0	3.91638e-07	0
		YDR433W	0	0	0	0	0	0	0	0	0	0	0	0	0	0	0	0	0	0	0	0	0	0	0	0	0	0	0	0	0	0							YDR433W	0	0	0	0	0	0	0	0	0	0
		YDR435C	0	0	0	0	0	0	0	0	0	0	0	0	0	0	0	0	0	0	0	0	0	0	0	0	0	0	0	0	0	0							YDR435C	0	0	0	0	0	0	0	0	0	0
		YDR436W	682	661	650	577	517	621	567	648	623	745	680	664	597	584	542	494	621	617	487	563	493	678	397	416	331	297	215	182	494	608							YDR436W	0.000241328	0.000247006	0.00022567	0.000252922	0.000253532	0.000249008	0.000248364	0.000268086	0.000243991	0.000260652
		YDR438W	2	4	4	5	6	4	4	2	4	3	1	6	3	4	6	2	5	3	4	4	4	4	1	6	0	2	1	0	5	4							YDR438W	7.07706e-07	1.49474e-06	1.38874e-06	2.1917e-06	2.94234e-06	1.60392e-06	1.75213e-06	8.27424e-07	1.56655e-06	1.04961e-06
		YDR439W	0	0	0	0	0	0	0	0	0	0	0	0	0	0	0	0	0	0	0	0	0	0	0	0	0	0	0	0	0	0							YDR439W	0	0	0	0	0	0	0	0	0	0
		YDR440W	0	3	2	0	0	0	0	1	0	0	0	0	0	0	0	1	0	5	0	1	2	0	0	0	0	1	0	0	0	0							YDR440W	0	1.12106e-06	6.94371e-07	0	0	0	0	4.13712e-07	0	0
		YDR441C	1060	1049	1116	819	666	903	880	909	933	1095	936	975	841	907	764	731	1085	1173	1282	1303	1524	1905	2486	2037	3010	2320	2142	1892	699	833							YDR441C	0.000375084	0.000391996	0.000387459	0.000359	0.0003266	0.000362085	0.000385468	0.000376064	0.000365398	0.000383106
		YDR442W	0	0	0	0	0	0	0	0	0	0	0	0	0	0	0	0	1	0	0	0	0	0	0	0	0	0	0	0	0	0							YDR442W	0	0	0	0	0	0	0	0	0	0
		YDR443C	393	444	364	316	251	317	271	298	285	343	301	294	253	283	211	189	280	250	227	217	148	184	149	113	110	115	68	106	488	609							YDR443C	0.000139064	0.000165916	0.000126375	0.000138515	0.000123088	0.000127111	0.000118707	0.000123286	0.000111617	0.000120005
		YDR444W	1040	995	1036	887	763	972	844	1004	971	1112	1005	1065	858	927	812	770	1102	1255	1222	1378	1309	1525	1429	1314	1364	1294	1021	979	530	677							YDR444W	0.000368007	0.000371817	0.000359684	0.000388807	0.000374168	0.000389752	0.000369699	0.000415367	0.000380281	0.000389054
		YDR445C	1245	1290	1311	977	960	1189	1002	1135	1226	1362	1238	1267	1089	1173	1006	972	1433	1452	1276	1404	1270	1469	1125	985	776	743	455	590	540	668							YDR445C	0.000440547	0.000482055	0.00045516	0.000428257	0.000470775	0.000476765	0.000438908	0.000469563	0.000480148	0.000476521
		YDR446W	0	2	0	0	0	0	1	0	1	0	0	2	0	0	0	0	0	1	1	2	1	2	0	1	0	0	0	0	0	0							YDR446W	0	7.47372e-07	0	0	0	0	4.38032e-07	0	3.91638e-07	0
		YDR447C	715	639	676	528	405	473	424	408	394	433	405	386	271	356	465	395	555	534	671	706	863	1014	1027	813	377	275	118	71	455	575							YDR447C	0.000253005	0.000238785	0.000234697	0.000231443	0.000198608	0.000189663	0.000185726	0.000168795	0.000154305	0.000151493
		YDR448W	0	0	0	0	0	0	0	0	0	0	0	0	0	0	0	0	0	0	0	0	0	0	0	0	0	0	0	0	0	0							YDR448W	0	0	0	0	0	0	0	0	0	0
		YDR450W	0	0	1	1	0	0	0	0	0	1	0	0	0	0	0	0	0	0	0	0	0	0	0	0	0	0	0	0	1	0							YDR450W	0	0	3.47185e-07	4.38339e-07	0	0	0	0	0	3.49868e-07
		YDR451C	979	960	1003	796	746	959	762	880	901	1112	962	985	801	901	823	717	1013	966	887	879	766	1010	581	568	387	380	161	208	576	646							YDR451C	0.000346422	0.000358738	0.000348227	0.000348918	0.000365831	0.00038454	0.00033378	0.000364067	0.000352866	0.000389054
		YDR452W	966	834	947	744	684	807	763	763	865	874	871	849	746	805	744	609	843	871	740	780	704	832	448	359	215	211	100	137	655	751							YDR452W	0.000341822	0.000311654	0.000328785	0.000326124	0.000335427	0.000323591	0.000334218	0.000315662	0.000338767	0.000305785
		YDR453C	68	65	115	95	74	117	116	122	82	130	117	146	91	106	94	82	79	127	77	104	27	34	30	8	23	27	13	15	15	22							YDR453C	2.4062e-05	2.42896e-05	3.99263e-05	4.16422e-05	3.62889e-05	4.69146e-05	5.08117e-05	5.04729e-05	3.21143e-05	4.54829e-05
		YDR455C	474	442	394	382	311	355	277	337	321	376	304	324	237	301	277	230	361	427	438	492	341	380	192	170	126	101	61	67	435	507							YDR455C	0.000167726	0.000165169	0.000136791	0.000167446	0.000152511	0.000142348	0.000121335	0.000139421	0.000125716	0.000131551
		YDR456W	14	16	20	20	12	26	18	21	8	22	17	15	18	10	9	15	11	18	14	12	6	4	2	3	1	2	1	2	7	3							YDR456W	4.95394e-06	5.97897e-06	6.94371e-06	8.76679e-06	5.88469e-06	1.04255e-05	7.88457e-06	8.68796e-06	3.1331e-06	7.69711e-06
		YDR457W	1107	985	1070	861	690	933	821	777	809	976	849	864	668	774	740	750	786	739	648	684	605	791	440	423	187	151	104	62	538	652							YDR457W	0.000391715	0.000368081	0.000371488	0.00037741	0.000338369	0.000374114	0.000359624	0.000321454	0.000316835	0.000341472
		YDR458C	232	336	440	365	334	430	439	458	252	451	414	408	367	400	353	316	288	385	325	332	142	118	93	16	70	97	44	55	69	52							YDR458C	8.20939e-05	0.000125558	0.000152762	0.000159994	0.00016379	0.000172421	0.000192296	0.00018948	9.86928e-05	0.000157791
		YDR459C	790	725	683	499	488	539	512	521	601	628	648	579	544	546	454	414	589	571	474	504	413	486	288	321	128	126	76	65	386	474							YDR459C	0.000279544	0.000270922	0.000237128	0.000218731	0.000239311	0.000216128	0.000224272	0.000215544	0.000235374	0.000219717
		YDR461W	205	165	220	120	127	149	159	183	163	203	154	183	136	154	130	144	157	165	121	134	148	182	121	120	100	67	39	41	120	138							YDR461W	7.25398e-05	6.16582e-05	7.63808e-05	5.26007e-05	6.22796e-05	5.9746e-05	6.96471e-05	7.57093e-05	6.3837e-05	7.10233e-05
		YDR462W	0	0	0	0	0	0	0	0	0	0	0	0	0	0	0	0	0	0	0	0	0	0	0	0	0	0	0	0	0	0							YDR462W	0	0	0	0	0	0	0	0	0	0
		YDR463W	620	500	589	493	386	442	429	460	432	474	428	389	298	297	417	357	427	468	423	466	247	232	69	65	50	37	21	34	407	547							YDR463W	0.000219389	0.000186843	0.000204492	0.000216101	0.000189291	0.000177233	0.000187916	0.000190308	0.000169188	0.000165838
		YDR465C	908	754	876	775	673	803	746	714	766	880	857	751	687	773	628	614	770	880	711	754	675	843	508	485	365	311	179	166	528	587							YDR465C	0.000321298	0.000281759	0.000304134	0.000339713	0.000330033	0.000321987	0.000326772	0.000295391	0.000299995	0.000307884
		YDR466W	0	4	7	5	4	1	6	3	6	8	3	4	4	4	2	1	2	4	0	3	0	1	0	0	0	0	0	0	0	0							YDR466W	0	1.49474e-06	2.4303e-06	2.1917e-06	1.96156e-06	4.0098e-07	2.62819e-06	1.24114e-06	2.34983e-06	2.79895e-06
		YDR467C	0	0	1	0	0	0	0	1	1	0	0	1	0	0	1	0	0	0	0	0	0	0	0	0	0	0	0	0	0	0							YDR467C	0	0	3.47185e-07	0	0	0	0	4.13712e-07	3.91638e-07	0
		YDR469W	387	397	434	312	317	376	310	316	360	425	354	350	288	369	298	255	193	218	165	230	262	321	270	247	235	230	121	133	428	590							YDR469W	0.000136941	0.000148353	0.000150678	0.000136762	0.000155454	0.000150768	0.00013579	0.000130733	0.00014099	0.000148694
		YDR470C	0	0	0	0	0	0	0	0	0	0	0	0	0	0	0	0	0	0	0	0	0	0	0	0	0	0	0	0	0	0							YDR470C	0	0	0	0	0	0	0	0	0	0
		YDR471W	0	0	0	0	0	0	0	0	0	0	0	0	0	0	0	0	0	0	0	0	0	0	0	0	0	0	0	0	0	0							YDR471W	0	0	0	0	0	0	0	0	0	0
		YDR474C	1377	1467	1566	1110	1082	1337	1174	1171	1417	1365	1425	1289	1334	1508	1428	1407	1618	1462	844	702	130	191	110	88	138	163	143	144	805	1152							YDR474C	0.000487255	0.000548197	0.000543692	0.000486557	0.000530603	0.00053611	0.000514249	0.000484457	0.000554951	0.00047757
		YDR475C	0	0	0	0	0	0	0	0	0	0	0	0	0	0	0	0	0	0	0	0	0	0	0	0	0	0	0	0	0	0							YDR475C	0	0	0	0	0	0	0	0	0	0
		YDR476C	673	615	730	561	525	600	573	658	568	685	595	630	565	603	493	481	552	643	527	623	440	484	287	269	165	192	90	77	549	573							YDR476C	0.000238143	0.000229817	0.000253445	0.000245908	0.000257455	0.000240588	0.000250992	0.000272223	0.00022245	0.00023966
		YDR477W	0	0	0	0	0	0	0	0	0	0	0	0	0	0	0	0	0	0	0	0	0	0	0	0	0	0	0	0	0	0							YDR477W	0	0	0	0	0	0	0	0	0	0
		YDR479C	0	0	1	1	1	1	0	2	0	0	0	1	0	0	0	0	0	1	0	0	0	0	0	0	0	0	0	0	0	0							YDR479C	0	0	3.47185e-07	4.38339e-07	4.90391e-07	4.0098e-07	0	8.27424e-07	0	0
		YDR480W	2714	2458	2665	2042	1880	2184	2048	2112	2409	2597	2478	2368	2096	2213	2009	1768	2330	2315	1985	2124	2049	2437	1745	1821	1013	857	624	518	1638	2055							YDR480W	0.000960357	0.00091852	0.000925249	0.000895089	0.000921934	0.00087574	0.000897089	0.00087376	0.000943456	0.000908608
		YDR481C	939	726	935	710	596	767	681	782	816	844	902	786	685	776	656	627	841	823	603	760	547	747	390	423	260	261	140	161	468	652							YDR481C	0.000332268	0.000271296	0.000324618	0.000311221	0.000292273	0.000307552	0.0002983	0.000323523	0.000319577	0.000295289
		YDR482C	903	788	911	653	645	759	613	676	752	792	783	752	681	716	672	593	771	761	646	731	587	709	374	291	200	187	93	66	597	683							YDR482C	0.000319529	0.000294464	0.000316286	0.000286236	0.000316302	0.000304344	0.000268514	0.000279669	0.000294512	0.000277096
		YDR483W	1012	1010	938	780	722	870	856	879	967	1080	1004	951	813	952	771	788	995	921	792	909	880	1053	764	667	510	478	251	251	649	787							YDR483W	0.000358099	0.000377423	0.00032566	0.000341905	0.000354062	0.000348852	0.000374955	0.000363653	0.000378714	0.000377858
		YDR484W	150	152	116	85	77	105	79	87	109	91	85	115	45	82	49	55	61	64	64	45	82	83	55	49	50	48	21	22	378	471							YDR484W	5.30779e-05	5.68002e-05	4.02735e-05	3.72588e-05	3.77601e-05	4.21029e-05	3.46045e-05	3.5993e-05	4.26885e-05	3.1838e-05
		YDR485C	0	0	0	0	0	0	0	0	0	0	0	0	0	0	0	0	0	0	0	0	0	0	0	0	0	0	0	0	0	0							YDR485C	0	0	0	0	0	0	0	0	0	0
		YDR486C	1064	953	1013	804	647	834	825	846	927	1032	922	985	804	920	721	729	2033	2011	4554	4760	5688	6773	4467	4054	2737	2421	1221	1415	455	608							YDR486C	0.000376499	0.000356123	0.000351699	0.000352425	0.000317283	0.000334417	0.000361376	0.000350001	0.000363048	0.000361064
		YDR488C	267	257	290	198	197	218	202	237	247	273	237	220	182	210	201	190	230	231	241	237	231	256	180	155	156	118	64	70	219	298							YDR488C	9.44787e-05	9.60372e-05	0.000100684	8.67912e-05	9.66069e-05	8.74136e-05	8.84824e-05	9.80498e-05	9.67346e-05	9.55141e-05
		YDR490C	0	0	0	0	0	0	0	0	0	0	0	0	0	0	0	0	0	0	0	0	0	0	0	0	0	0	0	0	0	0							YDR490C	0	0	0	0	0	0	0	0	0	0
		YDR491C	860	821	909	655	615	780	652	777	764	850	842	739	708	747	650	612	860	862	780	867	783	946	611	521	416	340	220	232	489	634							YDR491C	0.000304314	0.000306796	0.000315591	0.000287112	0.00030159	0.000312764	0.000285597	0.000321454	0.000299211	0.000297388
		YDR492W	979	993	1056	866	772	948	835	918	980	1050	946	918	831	946	837	780	1037	1067	1032	971	966	1132	703	614	530	384	284	285	624	749							YDR492W	0.000346422	0.00037107	0.000366628	0.000379602	0.000378582	0.000380129	0.000365757	0.000379788	0.000383805	0.000367362
		YDR493W	668	687	663	536	426	611	480	564	556	693	585	548	480	489	408	423	90	110	54	62	39	44	44	46	51	51	41	27	595	658							YDR493W	0.000236374	0.000256722	0.000230184	0.00023495	0.000208906	0.000244999	0.000210255	0.000233334	0.000217751	0.000242459
		YDR494W	0	1	0	0	0	0	3	2	3	2	3	2	0	0	2	1	4	1	1	0	0	0	0	0	0	0	0	0	0	0							YDR494W	0	3.73686e-07	0	0	0	0	1.3141e-06	8.27424e-07	1.17491e-06	6.99737e-07
		YDR495C	232	255	263	183	130	193	166	184	160	203	171	184	151	160	132	105	257	244	558	563	595	651	201	199	113	81	34	35	464	541							YDR495C	8.20939e-05	9.52899e-05	9.13097e-05	8.02161e-05	6.37508e-05	7.73891e-05	7.27133e-05	7.61231e-05	6.26621e-05	7.10233e-05
		YDR496C	40	39	46	36	25	40	28	17	31	43	20	29	22	31	33	32	33	40	31	29	27	46	31	26	30	15	8	8	47	46							YDR496C	1.41541e-05	1.45737e-05	1.59705e-05	1.57802e-05	1.22598e-05	1.60392e-05	1.22649e-05	7.03311e-06	1.21408e-05	1.50443e-05
		YDR497C	960	860	958	782	702	764	699	779	871	887	812	819	651	752	748	679	814	879	685	739	585	774	456	396	305	254	148	175	530	715							YDR497C	0.000339699	0.00032137	0.000332604	0.000342781	0.000344254	0.000306349	0.000306184	0.000322282	0.000341117	0.000310333
		YDR500C	569	523	511	386	317	415	279	259	255	297	256	253	189	233	296	347	385	434	598	613	642	748	861	715	556	403	261	256	545	675							YDR500C	0.000201342	0.000195438	0.000177412	0.000169199	0.000155454	0.000166407	0.000122211	0.000107151	9.98677e-05	0.000103911
		YDR501W	0	0	0	0	0	0	0	0	0	0	0	0	0	0	0	0	0	0	0	0	0	0	0	0	0	0	0	0	0	0							YDR501W	0	0	0	0	0	0	0	0	0	0
		YDR502C	865	841	904	717	638	797	687	760	802	857	757	777	718	765	695	589	829	917	742	887	639	821	443	472	318	237	162	141	519	602							YDR502C	0.000306083	0.00031427	0.000313856	0.000314289	0.000312869	0.000319581	0.000300928	0.000314421	0.000314094	0.000299837
		YDR503C	995	894	991	782	699	865	764	797	868	946	928	789	694	810	727	726	887	1010	865	890	872	1026	1009	797	758	685	447	465	594	706							YDR503C	0.000352084	0.000334075	0.000344061	0.000342781	0.000342783	0.000346848	0.000334656	0.000329729	0.000339942	0.000330976
		YDR504C	1458	1506	1593	1223	1109	1324	1263	1298	1435	1599	1475	1367	1340	1376	1165	1098	1398	1314	1119	1103	1082	1264	820	680	522	502	296	373	871	1123							YDR504C	0.000515918	0.000562771	0.000553066	0.000536089	0.000543843	0.000530897	0.000553234	0.000536998	0.000562001	0.00055944
		YDR505C	1048	933	1014	744	664	836	779	916	940	976	1028	900	895	988	737	689	668	731	407	520	438	543	362	354	266	191	185	148	476	583							YDR505C	0.000370838	0.000348649	0.000352046	0.000326124	0.000325619	0.000335219	0.000341227	0.00037896	0.00036814	0.000341472
		YDR506C	969	953	943	787	686	834	819	822	894	1035	986	950	795	901	753	721	905	962	839	897	813	949	638	606	396	345	225	225	633	833							YDR506C	0.000342883	0.000356123	0.000327396	0.000344973	0.000336408	0.000334417	0.000358748	0.000340071	0.000350124	0.000362114
		YDR507C	1	2	4	4	1	4	2	2	3	3	1	3	0	2	0	1	0	2	1	2	0	0	1	0	1	1	1	0	1	0							YDR507C	3.53853e-07	7.47372e-07	1.38874e-06	1.75336e-06	4.90391e-07	1.60392e-06	8.76064e-07	8.27424e-07	1.17491e-06	1.04961e-06
		YDR508C	0	0	0	0	0	0	0	0	0	0	0	1	0	0	0	0	0	0	0	0	0	0	0	0	0	0	0	0	0	1							YDR508C	0	0	0	0	0	0	0	0	0	0
		YDR509W	808	789	788	669	589	803	728	784	783	908	903	919	883	957	578	582	805	864	860	971	659	775	359	400	292	242	171	172	558	656							YDR509W	0.000285913	0.000294838	0.000273582	0.000293249	0.00028884	0.000321987	0.000318887	0.00032435	0.000306653	0.000317681
		YDR511W	881	793	893	691	653	746	711	754	728	836	751	862	678	776	669	592	851	849	857	944	900	1142	739	756	500	441	258	249	458	572							YDR511W	0.000311744	0.000296333	0.000310037	0.000302892	0.000320225	0.000299131	0.000311441	0.000311939	0.000285113	0.00029249
		YDR512C	425	316	344	291	233	287	287	286	267	334	272	274	202	208	212	187	101	106	66	70	30	51	27	17	17	24	14	16	400	533							YDR512C	0.000150387	0.000118085	0.000119432	0.000127557	0.000114261	0.000115081	0.000125715	0.000118322	0.000104567	0.000116856
		YDR513W	932	816	914	653	614	795	645	744	756	864	734	664	538	600	654	628	820	769	797	896	899	1114	723	715	567	468	233	235	603	720							YDR513W	0.000329791	0.000304928	0.000317327	0.000286236	0.0003011	0.000318779	0.000282531	0.000307802	0.000296078	0.000302286
		YDR514C	0	0	0	0	1	0	0	1	1	0	0	0	0	0	0	0	0	0	2	0	0	0	0	0	0	0	0	0	0	0							YDR514C	0	0	0	0	4.90391e-07	0	0	4.13712e-07	3.91638e-07	0
		YDR515W	842	729	903	642	567	732	696	745	686	815	736	740	702	685	639	530	752	775	649	663	507	713	451	400	273	197	122	167	468	576							YDR515W	0.000297944	0.000272417	0.000313508	0.000281414	0.000278051	0.000293517	0.00030487	0.000308216	0.000268664	0.000285143
		YDR516C	809	801	827	655	607	704	667	691	752	801	826	806	657	705	635	621	804	819	890	825	637	738	400	382	203	191	121	126	592	795							YDR516C	0.000286267	0.000299322	0.000287122	0.000287112	0.000297667	0.00028229	0.000292167	0.000285875	0.000294512	0.000280245
		YDR517W	851	857	982	684	672	802	750	794	823	902	835	811	755	875	786	634	858	875	679	730	619	748	452	429	202	206	145	159	597	764							YDR517W	0.000301129	0.000320249	0.000340936	0.000299824	0.000329542	0.000321586	0.000328524	0.000328488	0.000322318	0.000315581
		YDR518W	0	0	0	0	0	0	1	0	0	0	0	0	0	0	0	0	0	0	0	0	0	0	0	0	0	0	0	0	0	0							YDR518W	0	0	0	0	0	0	4.38032e-07	0	0	0
		YDR519W	659	570	623	537	465	546	483	544	634	644	642	592	579	545	503	470	711	661	560	577	514	632	491	370	312	227	149	166	384	495							YDR519W	0.000233189	0.000213001	0.000216296	0.000235388	0.000228032	0.000218935	0.000211569	0.000225059	0.000248299	0.000225315
		YDR520C	994	817	901	683	638	787	686	790	771	882	838	816	650	832	742	726	763	771	692	710	642	798	467	408	371	335	231	187	785	857							YDR520C	0.00035173	0.000305301	0.000312814	0.000299386	0.000312869	0.000315571	0.00030049	0.000326833	0.000301953	0.000308584
		YDR521W	0	0	0	0	0	0	0	0	0	0	0	0	0	0	0	0	0	0	0	0	0	0	0	0	0	0	0	0	0	0							YDR521W	0	0	0	0	0	0	0	0	0	0
		YDR522C	927	914	1036	755	745	931	760	770	916	966	988	858	728	901	734	750	914	953	830	850	729	930	531	456	416	309	184	225	577	771							YDR522C	0.000328022	0.000341549	0.000359684	0.000330946	0.000365341	0.000373312	0.000332904	0.000318558	0.00035874	0.000337973
		YDR523C	0	0	0	0	0	0	0	0	0	0	0	0	0	0	0	0	0	0	0	0	0	0	0	0	0	0	0	0	0	0							YDR523C	0	0	0	0	0	0	0	0	0	0
		YDR524C	804	692	932	644	549	717	630	703	737	819	776	765	621	674	571	524	752	787	621	638	616	751	528	352	349	342	247	261	538	639							YDR524C	0.000284498	0.000258591	0.000323577	0.00028229	0.000269224	0.000287503	0.00027596	0.00029084	0.000288637	0.000286542
		YDR524C-B	0	0	0	0	0	0	0	0	0	0	0	0	0	0	0	0	0	0	0	0	0	0	0	0	1	0	0	0	0	0							YDR524C-B	0	0	0	0	0	0	0	0	0	0
		YDR524W-A	0	0	0	0	0	0	0	0	0	0	0	0	0	0	0	0	0	0	0	0	0	0	0	0	0	0	0	0	0	0							YDR524W-A	0	0	0	0	0	0	0	0	0	0
		YDR525W	1028	1198	1104	879	819	1034	878	854	1051	1062	1007	904	965	1220	946	996	820	906	793	827	974	1109	1269	1063	1686	1532	1189	1478	926	1147							YDR525W	0.000363761	0.000447676	0.000383293	0.0003853	0.00040163	0.000414613	0.000384592	0.00035331	0.000411612	0.00037156
		YDR525W-A	798	725	792	649	554	726	669	707	803	790	736	787	690	742	687	681	708	720	540	642	618	774	537	497	378	290	184	209	686	854							YDR525W-A	0.000282375	0.000270922	0.000274971	0.000284482	0.000271676	0.000291111	0.000293043	0.000292495	0.000314485	0.000276396
		YDR528W	1198	1040	1257	962	849	1086	1015	1017	1115	1197	1088	1095	1064	1141	1035	895	1247	1217	1244	1271	1197	1421	869	819	593	448	313	259	647	830							YDR528W	0.000423916	0.000388633	0.000436412	0.000421682	0.000416342	0.000435464	0.000444602	0.000420745	0.000436676	0.000418793
		YDR529C	304	305	322	237	205	250	204	248	192	241	227	221	220	243	204	164	36	39	27	17	31	18	7	10	27	16	20	20	503	627							YDR529C	0.000107571	0.000113974	0.000111794	0.000103886	0.00010053	0.000100245	8.93585e-05	0.000102601	7.51945e-05	8.43183e-05
		YDR530C	0	0	0	4	0	0	2	3	0	0	0	0	0	0	0	0	0	0	0	0	0	2	0	0	0	0	0	0	0	0							YDR530C	0	0	0	1.75336e-06	0	0	8.76064e-07	1.24114e-06	0	0
		YDR532C	154	138	125	81	59	83	62	56	43	73	42	41	28	31	73	58	40	48	55	39	38	48	27	35	11	6	1	1	537	630							YDR532C	5.44933e-05	5.15686e-05	4.33982e-05	3.55055e-05	2.8933e-05	3.32813e-05	2.7158e-05	2.31679e-05	1.68404e-05	2.55404e-05
		YDR533C	888	851	975	754	572	821	713	762	810	863	865	831	670	849	693	641	865	865	831	850	754	930	588	505	340	378	205	221	590	674							YDR533C	0.000314221	0.000318007	0.000338506	0.000330508	0.000280503	0.000329204	0.000312317	0.000315249	0.000317227	0.000301936
		YDR534C	2835	2856	3019	2368	2199	2658	2453	2551	2726	3015	2760	2670	2479	2837	2348	2275	2870	2935	2577	2664	2244	2859	1785	1602	1164	1030	540	659	2119	2444							YDR534C	0.00100317	0.00106725	0.00104815	0.00103799	0.00107837	0.0010658	0.00107449	0.00105538	0.00106761	0.00105485
		YDR535C	790	747	881	662	590	701	721	738	737	918	819	724	671	715	659	580	808	803	627	759	570	794	496	435	294	279	160	180	630	679							YDR535C	0.000279544	0.000279143	0.00030587	0.000290181	0.00028933	0.000281087	0.000315821	0.00030532	0.000288637	0.000321179
		YDR536W	865	871	958	708	617	805	705	721	774	860	847	826	722	809	733	629	804	879	764	779	672	809	519	552	351	302	189	187	668	839							YDR536W	0.000306083	0.00032548	0.000332604	0.000310344	0.000302571	0.000322789	0.000308812	0.000298287	0.000303128	0.000300887
		YDR537C	712	696	692	568	487	586	486	562	613	685	651	566	613	650	547	513	517	592	444	491	510	524	377	374	340	249	162	145	609	591							YDR537C	0.000251943	0.000260085	0.000240252	0.000248977	0.00023882	0.000234974	0.000212883	0.000232506	0.000240074	0.00023966
		YDR538W	0	0	0	0	0	0	0	0	0	0	0	0	0	0	0	0	0	0	0	0	0	0	0	0	0	0	0	0	0	1							YDR538W	0	0	0	0	0	0	0	0	0	0
		YDR539W	1011	1033	1008	807	719	927	788	869	945	1000	912	968	933	936	857	834	993	1059	927	951	850	1015	695	660	481	391	333	287	722	861							YDR539W	0.000357745	0.000386017	0.000349963	0.00035374	0.000352591	0.000371708	0.000345169	0.000359516	0.000370098	0.000349868
		YDR540C	876	881	990	780	614	860	708	790	841	964	950	856	767	837	739	678	846	825	704	798	665	864	463	417	336	243	129	164	633	750							YDR540C	0.000309975	0.000329217	0.000343713	0.000341905	0.0003011	0.000344843	0.000310127	0.000326833	0.000329368	0.000337273
		YDR541C	0	0	0	0	0	0	0	0	0	0	0	0	0	0	0	0	0	0	0	0	0	0	0	0	0	0	0	0	0	0							YDR541C	0	0	0	0	0	0	0	0	0	0
		YEL001C	975	949	1013	815	703	936	829	866	913	1014	844	931	807	901	778	777	945	943	810	846	792	959	648	591	399	335	207	242	562	729							YEL001C	0.000345007	0.000354628	0.000351699	0.000357246	0.000344745	0.000375317	0.000363128	0.000358275	0.000357566	0.000354767
		YEL003W	0	0	0	0	0	0	0	0	0	0	0	0	0	0	0	0	0	0	0	0	0	0	0	0	0	0	0	0	0	0							YEL003W	0	0	0	0	0	0	0	0	0	0
		YEL004W	0	0	437	405	418	496	485	533	558	679	690	725	620	765	0	0	106	93	177	214	189	198	183	211	204	238	149	116	0	0							YEL004W	0	0	0.00015172	0.000177527	0.000204983	0.000198886	0.000212445	0.000220509	0.000218534	0.000237561
		YEL005C	797	813	869	662	584	708	703	699	792	903	776	814	722	814	668	626	857	838	660	789	752	965	688	561	438	370	273	291	477	606							YEL005C	0.000282021	0.000303807	0.000301704	0.000290181	0.000286388	0.000283894	0.000307936	0.000289185	0.000310177	0.000315931
		YEL006W	868	775	929	699	596	737	698	740	795	874	803	839	669	749	667	635	841	889	738	825	757	1073	622	610	488	441	250	271	505	686							YEL006W	0.000307144	0.000289606	0.000322535	0.000306399	0.000292273	0.000295522	0.000305746	0.000306147	0.000311352	0.000305785
		YEL007W	1	8	8	3	1	2	1	4	1	2	2	1	6	1	3	2	0	0	1	2	1	3	0	0	3	1	1	1	1	3							YEL007W	3.53853e-07	2.98949e-06	2.77748e-06	1.31502e-06	4.90391e-07	8.0196e-07	4.38032e-07	1.65485e-06	3.91638e-07	6.99737e-07
		YEL008W	588	579	613	489	461	552	462	483	519	569	567	566	496	526	452	430	319	362	229	238	175	207	131	83	92	80	54	53	459	485							YEL008W	0.000208066	0.000216364	0.000212825	0.000214348	0.00022607	0.000221341	0.000202371	0.000199823	0.00020326	0.000199075
		YEL009C	0	0	0	0	0	0	0	0	0	0	0	0	0	0	0	0	0	0	0	0	0	0	0	0	0	0	0	0	0	0							YEL009C	0	0	0	0	0	0	0	0	0	0
		YEL010W	109	164	203	156	140	202	168	200	141	250	204	206	158	200	178	127	126	168	153	131	61	73	44	4	25	32	8	18	40	45							YEL010W	3.857e-05	6.12845e-05	7.04786e-05	6.83809e-05	6.86547e-05	8.09979e-05	7.35894e-05	8.27424e-05	5.5221e-05	8.74671e-05
		YEL011W	825	753	903	691	634	727	665	747	682	881	769	794	677	717	643	576	853	858	846	910	647	782	460	262	331	237	168	173	369	388							YEL011W	0.000291929	0.000281385	0.000313508	0.000302892	0.000310908	0.000291512	0.000291291	0.000309043	0.000267097	0.000308234
		YEL012W	745	679	770	654	607	712	702	740	737	860	844	793	670	818	670	626	757	696	569	569	531	595	426	412	252	244	149	142	475	570							YEL012W	0.00026362	0.000253733	0.000267333	0.000286674	0.000297667	0.000285498	0.000307498	0.000306147	0.000288637	0.000300887
		YEL013W	0	0	0	0	0	0	0	0	0	0	0	0	0	0	0	0	0	0	0	0	0	0	0	0	0	0	0	0	0	0							YEL013W	0	0	0	0	0	0	0	0	0	0
		YEL014C	877	838	944	708	668	836	752	738	872	885	935	757	741	826	733	629	857	778	714	647	587	673	434	434	346	296	170	189	666	817							YEL014C	0.000310329	0.000313149	0.000327743	0.000310344	0.000327581	0.000335219	0.0003294	0.00030532	0.000341508	0.000309634
		YEL015W	733	696	709	516	506	583	565	653	667	712	639	637	559	603	567	497	728	686	601	681	507	625	427	366	295	268	212	144	517	703							YEL015W	0.000259374	0.000260085	0.000246154	0.000226183	0.000248138	0.000233771	0.000247488	0.000270154	0.000261223	0.000249106
		YEL016C	0	1	0	0	0	0	0	0	0	0	0	0	0	0	0	0	0	0	0	0	0	0	1	0	0	0	0	0	0	1							YEL016C	0	3.73686e-07	0	0	0	0	0	0	0	0
		YEL017C-A	801	797	888	680	573	725	652	664	763	801	786	786	693	760	621	537	763	787	691	718	576	797	484	468	308	301	158	160	604	727							YEL017C-A	0.000283436	0.000297828	0.000308301	0.000298071	0.000280994	0.00029071	0.000285597	0.000274705	0.00029882	0.000280245
		YEL017W	0	0	0	0	2	0	0	0	0	0	0	0	0	1	0	0	0	0	0	0	0	0	0	0	0	0	0	0	0	0							YEL017W	0	0	0	0	9.80781e-07	0	0	0	0	0
		YEL018W	0	0	0	0	0	0	0	0	0	0	0	0	0	0	0	0	0	0	0	0	0	0	0	0	0	0	0	0	0	0							YEL018W	0	0	0	0	0	0	0	0	0	0
		YEL020C	688	587	688	541	467	618	604	591	718	738	749	717	614	660	555	573	723	677	601	680	567	719	430	527	336	307	135	195	468	649							YEL020C	0.000243451	0.000219354	0.000238864	0.000237142	0.000229012	0.000247806	0.000264571	0.000244504	0.000281196	0.000258203
		YEL022W	0	0	0	0	0	0	0	0	0	0	0	0	0	0	0	0	0	0	0	0	0	0	0	0	0	0	0	0	0	0							YEL022W	0	0	0	0	0	0	0	0	0	0
		YEL023C	890	893	881	724	762	798	750	780	882	1003	913	830	768	869	776	689	934	940	788	909	747	938	646	462	388	353	202	233	559	668							YEL023C	0.000314929	0.000333701	0.00030587	0.000317358	0.000373678	0.000319982	0.000328524	0.000322696	0.000345425	0.000350918
		YEL024W	2	2	0	0	0	1	0	1	0	0	0	2	0	0	0	1	0	0	0	0	0	0	0	1	0	0	0	0	1	3							YEL024W	7.07706e-07	7.47372e-07	0	0	0	4.0098e-07	0	4.13712e-07	0	0
		YEL025C	992	812	948	707	704	827	734	844	794	969	873	847	763	810	782	657	872	865	811	834	731	948	633	523	329	287	245	211	589	680							YEL025C	0.000351022	0.000303433	0.000329132	0.000309906	0.000345235	0.00033161	0.000321515	0.000349173	0.000310961	0.000339023
		YEL027W	0	0	0	0	0	0	0	0	0	0	0	0	0	0	0	0	0	0	0	0	0	0	0	0	0	1	1	0	0	0							YEL027W	0	0	0	0	0	0	0	0	0	0
		YEL028W	958	996	1103	853	733	864	897	860	952	1074	981	932	877	990	889	772	1008	1030	907	1065	808	1009	586	536	441	355	234	223	655	758							YEL028W	0.000338991	0.000372191	0.000382945	0.000373903	0.000359456	0.000346447	0.000392915	0.000355793	0.000372839	0.000375759
		YEL029C	0	0	309	302	299	388	402	448	363	529	460	549	442	573	0	0	74	98	186	203	142	118	170	34	293	264	183	236	0	0							YEL029C	0	0	0.00010728	0.000132378	0.000146627	0.00015558	0.000176089	0.000185343	0.000142165	0.00018508
		YEL030W	0	0	0	1	2	0	0	0	2	0	1	1	2	2	0	1	0	0	0	0	0	0	0	2	0	0	0	0	0	0							YEL030W	0	0	0	4.38339e-07	9.80781e-07	0	0	0	7.83276e-07	0
		YEL031W	0	0	0	0	0	0	0	1	0	0	0	0	0	0	0	0	0	0	0	0	0	0	0	0	0	0	0	0	0	0							YEL031W	0	0	0	0	0	0	0	4.13712e-07	0	0
		YEL033W	0	0	0	0	0	0	0	0	0	0	0	0	0	0	0	0	0	0	0	0	0	0	0	0	0	0	0	0	0	0							YEL033W	0	0	0	0	0	0	0	0	0	0
		YEL036C	0	0	0	0	0	0	0	0	0	0	0	0	0	0	0	0	0	0	0	0	0	0	0	0	0	0	0	0	0	0							YEL036C	0	0	0	0	0	0	0	0	0	0
		YEL037C	1384	1379	1390	1071	1029	1177	1062	1074	1097	1186	1153	1149	1021	1118	1207	1154	1315	1174	926	1056	640	774	443	371	359	343	247	224	1450	1862							YEL037C	0.000489732	0.000515313	0.000482588	0.000469461	0.000504612	0.000471953	0.00046519	0.000444327	0.000429627	0.000414944
		YEL038W	947	806	989	694	633	754	710	734	760	801	786	779	707	791	669	600	802	814	792	711	678	842	461	460	291	250	249	167	644	757							YEL038W	0.000335099	0.000301191	0.000343366	0.000304207	0.000310417	0.000302339	0.000311003	0.000303665	0.000297645	0.000280245
		YEL039C	998	869	990	738	674	840	826	840	802	899	956	834	874	841	768	796	869	821	739	807	767	873	630	572	417	392	225	268	607	691							YEL039C	0.000353145	0.000324733	0.000343713	0.000323494	0.000330523	0.000336823	0.000361814	0.000347518	0.000314094	0.000314532
		YEL040W	962	913	878	670	726	840	721	782	864	964	894	845	868	913	739	780	883	891	810	903	785	976	619	638	468	381	246	266	574	732							YEL040W	0.000340406	0.000341175	0.000304829	0.000293687	0.000356024	0.000336823	0.000315821	0.000323523	0.000338375	0.000337273
		YEL041W	0	0	0	0	0	0	0	0	0	0	0	0	0	0	0	0	0	0	0	0	0	0	0	0	0	0	0	0	0	0							YEL041W	0	0	0	0	0	0	0	0	0	0
		YEL042W	796	750	687	565	518	637	551	604	681	709	613	694	577	682	568	539	640	652	678	747	828	999	800	794	691	549	292	410	533	623							YEL042W	0.000281667	0.000280264	0.000238516	0.000247662	0.000254022	0.000255424	0.000241356	0.000249882	0.000266706	0.000248057
		YEL043W	0	0	0	0	0	0	0	0	0	0	0	0	0	0	0	0	0	0	0	0	0	0	1	0	0	0	0	0	0	0							YEL043W	0	0	0	0	0	0	0	0	0	0
		YEL044W	0	0	0	0	0	0	0	0	0	0	0	0	0	0	0	0	0	0	0	0	0	0	0	0	0	0	0	0	0	0							YEL044W	0	0	0	0	0	0	0	0	0	0
		YEL045C	0	0	0	0	0	0	0	0	0	0	0	0	0	0	0	0	0	0	0	0	0	0	0	0	0	0	0	0	0	0							YEL045C	0	0	0	0	0	0	0	0	0	0
		YEL046C	0	0	0	0	0	0	0	0	0	0	0	0	0	0	0	0	0	0	0	0	0	0	0	0	0	0	0	0	0	0							YEL046C	0	0	0	0	0	0	0	0	0	0
		YEL047C	0	0	0	0	0	0	0	0	0	0	0	0	0	0	0	0	0	0	0	0	0	0	0	0	0	0	0	0	0	0							YEL047C	0	0	0	0	0	0	0	0	0	0
		YEL048C	463	474	438	363	310	393	344	391	431	505	460	405	390	422	354	342	406	397	343	399	512	632	501	479	352	292	153	155	389	412							YEL048C	0.000163834	0.000177127	0.000152067	0.000159117	0.000152021	0.000157585	0.000150683	0.000161761	0.000168796	0.000176684
		YEL049W	882	874	926	689	624	854	695	879	838	973	950	794	748	824	725	684	904	886	747	825	850	1067	729	708	493	448	306	279	495	747							YEL049W	0.000312098	0.000326601	0.000321494	0.000302016	0.000306004	0.000342437	0.000304432	0.000363653	0.000328193	0.000340422
		YEL050C	13	6	10	5	1	6	4	6	0	0	1	1	2	1	1	1	1	2	1	0	0	0	0	0	0	0	0	0	39	48							YEL050C	4.60009e-06	2.24211e-06	3.47185e-06	2.1917e-06	4.90391e-07	2.40588e-06	1.75213e-06	2.48227e-06	0	0
		YEL051W	0	0	0	0	0	0	0	0	0	0	0	0	0	0	0	0	0	0	0	0	0	0	0	0	0	0	0	0	0	0							YEL051W	0	0	0	0	0	0	0	0	0	0
		YEL052W	823	802	902	702	642	788	740	763	790	845	796	825	786	833	711	665	844	940	830	857	754	950	512	455	325	326	169	194	583	834							YEL052W	0.000291221	0.000299696	0.000313161	0.000307714	0.000314831	0.000315972	0.000324144	0.000315662	0.000309394	0.000295639
		YEL053C	429	383	426	303	298	323	328	377	404	481	451	414	407	497	343	303	325	315	457	453	663	837	720	688	462	501	349	231	442	510							YEL053C	0.000151803	0.000143122	0.000147901	0.000132817	0.000146136	0.000129516	0.000143674	0.00015597	0.000158222	0.000168287
		YEL054C	382	381	340	263	191	253	160	181	136	153	110	102	107	118	185	180	243	227	408	396	405	474	599	502	541	491	288	250	538	669							YEL054C	0.000135172	0.000142374	0.000118043	0.000115283	9.36646e-05	0.000101448	7.00851e-05	7.48819e-05	5.32628e-05	5.35299e-05
		YEL056W	825	741	858	676	545	724	725	677	781	825	752	717	694	687	669	585	718	773	614	693	537	647	462	426	329	349	167	236	543	680							YEL056W	0.000291929	0.000276901	0.000297885	0.000296317	0.000267263	0.000290309	0.000317573	0.000280083	0.000305869	0.000288641
		YEL057C	887	821	899	727	594	767	710	715	820	944	758	870	739	815	640	715	895	829	706	796	726	894	571	590	374	321	253	201	535	676							YEL057C	0.000313868	0.000306796	0.00031212	0.000318673	0.000291292	0.000307552	0.000311003	0.000295804	0.000321143	0.000330276
		YEL059C-A	0	0	0	0	0	0	0	0	0	0	0	0	0	0	0	0	0	0	0	0	0	0	0	0	0	0	0	0	0	0							YEL059C-A	0	0	0	0	0	0	0	0	0	0
		YEL059W	0	0	0	0	0	0	0	0	0	0	0	0	0	0	0	0	0	0	0	0	0	0	0	0	0	0	0	0	0	0							YEL059W	0	0	0	0	0	0	0	0	0	0
		YEL060C	0	0	0	0	0	0	0	0	0	0	0	0	0	0	0	0	0	0	0	0	0	0	0	0	0	0	0	0	0	0							YEL060C	0	0	0	0	0	0	0	0	0	0
		YEL061C	0	0	0	0	0	0	0	0	0	0	0	0	0	0	0	0	0	0	0	0	0	0	0	0	0	0	0	0	0	0							YEL061C	0	0	0	0	0	0	0	0	0	0
		YEL062W	0	0	0	0	0	0	0	0	0	0	0	0	0	0	0	0	0	0	0	0	0	0	0	0	0	0	0	0	0	0							YEL062W	0	0	0	0	0	0	0	0	0	0
		YEL063C	130	93	118	98	88	108	115	98	124	145	143	158	129	153	95	96	132	142	241	256	448	462	816	883	1220	1195	1166	1040	184	288							YEL063C	4.60009e-05	3.47528e-05	4.09679e-05	4.29572e-05	4.31544e-05	4.33058e-05	5.03737e-05	4.05438e-05	4.85631e-05	5.07309e-05
		YEL064C	0	0	0	0	0	0	1	0	0	0	0	0	0	0	0	0	0	0	0	0	0	0	0	0	0	0	0	0	0	0							YEL064C	0	0	0	0	0	0	4.38032e-07	0	0	0
		YEL065W	0	0	0	0	0	0	0	0	0	0	0	0	0	0	0	0	0	0	0	0	0	0	0	0	0	0	0	0	0	0							YEL065W	0	0	0	0	0	0	0	0	0	0
		YEL066W	818	751	833	696	573	676	635	727	701	810	728	779	656	733	608	572	833	808	667	777	679	857	532	423	310	245	171	151	612	742							YEL066W	0.000289452	0.000280638	0.000289205	0.000305084	0.000280994	0.000271062	0.00027815	0.000300769	0.000274538	0.000283393
		YEL067C	938	799	971	702	625	730	661	750	844	882	854	827	775	743	657	624	804	850	776	774	793	887	664	562	426	442	217	239	611	814							YEL067C	0.000331914	0.000298575	0.000337117	0.000307714	0.000306494	0.000292715	0.000289539	0.000310284	0.000330543	0.000308584
		YEL068C	971	918	1028	716	751	815	725	848	887	980	951	874	865	972	865	806	954	969	914	912	812	1081	624	603	427	389	253	253	655	796							YEL068C	0.000343591	0.000343044	0.000356907	0.000313851	0.000368283	0.000326799	0.000317573	0.000350828	0.000347383	0.000342871
		YEL071W	972	981	1092	872	699	843	803	880	844	937	861	843	830	884	771	748	1001	959	862	889	811	997	578	517	404	348	218	217	543	700							YEL071W	0.000343945	0.000366586	0.000379126	0.000382232	0.000342783	0.000338026	0.00035174	0.000364067	0.000330543	0.000327827
		YEL072W	0	0	586	515	501	679	671	818	815	1036	1007	1036	874	1026	0	0	162	156	352	372	404	522	554	558	996	895	577	589	0	0							YEL072W	0	0	0.000203451	0.000225745	0.000245686	0.000272265	0.000293919	0.000338417	0.000319185	0.000362464
		YER001W	944	887	950	708	713	869	771	846	885	943	825	872	751	769	748	688	840	838	821	818	811	972	586	616	353	341	189	173	503	542							YER001W	0.000334037	0.000331459	0.000329826	0.000310344	0.000349648	0.000348451	0.000337723	0.000350001	0.0003466	0.000329926
		YER002W	5	3	4	5	2	1	3	4	3	1	2	3	5	1	2	2	11	3	6	6	3	5	5	15	2	2	0	0	0	3							YER002W	1.76926e-06	1.12106e-06	1.38874e-06	2.1917e-06	9.80781e-07	4.0098e-07	1.3141e-06	1.65485e-06	1.17491e-06	3.49868e-07
		YER004W	1121	1049	1094	927	854	1040	877	1049	1084	1247	1114	1141	959	1147	928	830	1127	1155	1007	957	916	1147	945	893	1167	870	812	828	438	583							YER004W	0.000396669	0.000391996	0.000379821	0.00040634	0.000418794	0.000417019	0.000384154	0.000433984	0.000424536	0.000436286
		YER005W	1099	984	1010	828	735	926	848	928	927	1069	1013	1044	837	1045	780	789	877	890	783	789	677	911	603	569	467	364	178	207	521	712							YER005W	0.000388884	0.000367707	0.000350657	0.000362945	0.000360437	0.000371307	0.000371451	0.000383925	0.000363048	0.000374009
		YER007C-A	712	626	678	475	400	505	425	483	459	547	514	457	368	450	423	423	520	573	729	777	1205	1488	1697	1470	1617	1294	1080	1083	568	610							YER007C-A	0.000251943	0.000233927	0.000235392	0.000208211	0.000196156	0.000202495	0.000186164	0.000199823	0.000179762	0.000191378
		YER007W	0	0	0	0	0	0	0	0	0	0	0	0	0	0	0	0	0	0	0	0	0	0	0	0	0	0	0	0	0	0							YER007W	0	0	0	0	0	0	0	0	0	0
		YER010C	838	813	877	647	600	728	637	740	770	857	837	775	631	735	596	578	787	752	723	728	702	904	573	523	370	331	162	155	544	663							YER010C	0.000296529	0.000303807	0.000304482	0.000283605	0.000294234	0.000291913	0.000279026	0.000306147	0.000301561	0.000299837
		YER011W	954	907	931	720	663	795	776	817	805	908	930	814	745	899	784	709	805	791	705	766	602	804	526	461	311	302	170	155	618	806							YER011W	0.000337576	0.000338933	0.00032323	0.000315604	0.000325129	0.000318779	0.000339913	0.000338003	0.000315269	0.000317681
		YER014C-A	0	0	0	0	0	0	0	0	0	0	0	0	0	0	0	0	0	0	0	0	0	0	0	0	0	0	0	0	0	0							YER014C-A	0	0	0	0	0	0	0	0	0	0
		YER014W	0	0	0	0	0	0	0	0	0	0	0	0	0	0	0	0	0	0	0	0	0	0	0	0	0	0	0	0	0	0							YER014W	0	0	0	0	0	0	0	0	0	0
		YER015W	0	0	0	0	0	0	0	0	0	0	0	0	0	0	0	0	0	0	0	0	0	0	0	0	0	0	0	0	0	0							YER015W	0	0	0	0	0	0	0	0	0	0
		YER016W	0	0	0	0	0	0	0	0	0	0	0	0	0	0	0	0	0	0	0	0	0	0	0	0	0	0	0	0	0	0							YER016W	0	0	0	0	0	0	0	0	0	0
		YER017C	279	259	235	227	150	183	199	184	195	188	170	180	165	183	146	116	19	14	10	21	18	13	16	8	6	9	13	5	379	513							YER017C	9.8725e-05	9.67846e-05	8.15886e-05	9.9503e-05	7.35586e-05	7.33793e-05	8.71683e-05	7.61231e-05	7.63694e-05	6.57753e-05
		YER019C-A	894	797	869	636	604	708	650	763	756	829	793	725	654	714	654	613	711	767	562	656	462	561	293	275	128	151	66	61	499	646							YER019C-A	0.000316345	0.000297828	0.000301704	0.000278784	0.000296196	0.000283894	0.000284721	0.000315662	0.000296078	0.000290041
		YER019W	0	0	0	0	0	0	0	0	0	0	0	0	0	0	0	0	0	0	0	0	0	0	0	0	0	0	0	0	0	0							YER019W	0	0	0	0	0	0	0	0	0	0
		YER020W	0	1	0	0	0	0	0	0	0	0	0	0	0	0	0	0	0	0	0	0	0	0	0	0	0	0	0	1	3	0							YER020W	0	3.73686e-07	0	0	0	0	0	0	0	0
		YER024W	905	813	870	699	594	726	653	752	784	900	804	843	682	763	682	661	813	860	744	786	725	838	527	507	343	278	184	146	528	674							YER024W	0.000320237	0.000303807	0.000302051	0.000306399	0.000291292	0.000291111	0.000286035	0.000311112	0.000307044	0.000314882
		YER026C	0	0	0	0	0	0	0	0	0	0	0	0	0	0	0	0	0	0	0	0	0	0	0	0	0	0	0	0	0	0							YER026C	0	0	0	0	0	0	0	0	0	0
		YER027C	1193	1189	1225	957	915	1150	1116	1054	1152	1352	1208	1208	1038	1220	1068	935	1036	1004	1061	1184	738	881	382	440	241	236	159	184	720	902							YER027C	0.000422147	0.000444312	0.000425302	0.000419491	0.000448707	0.000461127	0.000488844	0.000436053	0.000451167	0.000473022
		YER028C	2186	1991	2198	1785	1520	1830	1770	1865	1920	2196	2035	2030	1723	2059	1748	1508	2006	1986	1841	1888	1863	2358	1665	1758	1415	1279	911	884	1135	1331							YER028C	0.000773522	0.000744008	0.000763113	0.000782436	0.000745394	0.000733793	0.000775316	0.000771573	0.000751945	0.000768311
		YER030W	763	718	808	637	515	681	612	644	641	740	741	731	689	706	572	546	856	903	1023	1012	1017	1383	1303	1313	1127	1104	742	709	540	634							YER030W	0.00026999	0.000268306	0.000280526	0.000279222	0.000252551	0.000273067	0.000268075	0.000266431	0.00025104	0.000258903
		YER031C	961	886	1051	744	694	880	726	807	914	944	863	756	804	890	785	741	926	809	718	686	521	698	361	297	300	242	121	149	830	947							YER031C	0.000340053	0.000331086	0.000364892	0.000326124	0.000340331	0.000352862	0.000318011	0.000333866	0.000357957	0.000330276
		YER032W	850	865	1006	726	712	778	720	784	811	939	875	854	683	816	747	660	771	809	585	701	574	760	431	442	251	221	146	151	622	747							YER032W	0.000300775	0.000323238	0.000349268	0.000318234	0.000349158	0.000311962	0.000315383	0.00032435	0.000317618	0.000328526
		YER033C	1060	964	1063	867	739	837	770	866	943	1017	948	953	813	885	863	735	873	962	783	841	734	857	565	519	371	354	173	229	539	728							YER033C	0.000375084	0.000360233	0.000369058	0.00038004	0.000362399	0.00033562	0.000337285	0.000358275	0.000369315	0.000355816
		YER034W	950	804	919	653	634	731	757	770	817	886	833	796	753	782	667	628	874	811	697	783	686	896	483	463	354	286	175	157	567	698							YER034W	0.00033616	0.000300443	0.000319063	0.000286236	0.000310908	0.000293116	0.00033159	0.000318558	0.000319968	0.000309983
		YER035W	682	687	697	581	547	636	598	586	640	818	670	736	624	649	575	509	637	720	755	779	876	999	1117	1038	1252	1240	1083	971	542	561							YER035W	0.000241328	0.000256722	0.000241988	0.000254675	0.000268244	0.000255023	0.000261943	0.000242435	0.000250648	0.000286192
		YER037W	1039	979	1197	831	810	944	803	921	986	1095	964	918	841	1013	811	806	1035	961	861	890	840	1068	674	580	384	322	223	222	566	752							YER037W	0.000367653	0.000365838	0.000415581	0.00036426	0.000397216	0.000378525	0.00035174	0.000381029	0.000386155	0.000383106
		YER038W-A	874	829	880	612	590	682	674	696	757	824	764	705	564	720	653	597	831	808	689	713	645	849	531	445	298	277	185	172	626	657							YER038W-A	0.000309267	0.000309786	0.000305523	0.000268264	0.00028933	0.000273468	0.000295233	0.000287944	0.00029647	0.000288292
		YER039C	659	771	861	701	665	786	678	696	658	854	817	811	706	815	706	657	808	786	707	849	600	736	499	173	351	382	176	259	382	499							YER039C	0.000233189	0.000288112	0.000298927	0.000307276	0.00032611	0.00031517	0.000296986	0.000287944	0.000257698	0.000298788
		YER039C-A	953	945	990	747	673	810	738	776	903	1046	915	875	846	936	760	749	900	895	685	766	639	859	516	437	314	319	170	190	634	780							YER039C-A	0.000337222	0.000353133	0.000343713	0.000327439	0.000330033	0.000324794	0.000323268	0.000321041	0.000353649	0.000365962
		YER040W	410	402	350	289	230	220	172	219	199	218	163	217	133	165	264	238	246	311	271	306	427	515	705	694	767	695	525	472	512	566							YER040W	0.00014508	0.000150222	0.000121515	0.00012668	0.00011279	8.82156e-05	7.53415e-05	9.0603e-05	7.7936e-05	7.62713e-05
		YER041W	845	780	928	706	628	768	650	729	776	840	812	825	734	717	672	667	858	805	750	860	756	891	559	559	365	380	205	205	481	579							YER041W	0.000299006	0.000291475	0.000322188	0.000309468	0.000307965	0.000307953	0.000284721	0.000301596	0.000303911	0.00029389
		YER042W	869	743	883	655	550	719	672	726	723	832	729	792	721	704	619	566	765	867	683	802	630	836	445	491	317	272	159	198	464	632							YER042W	0.000307498	0.000277649	0.000306565	0.000287112	0.000269715	0.000288305	0.000294357	0.000300355	0.000283154	0.000291091
		YER044C	0	0	0	0	0	0	0	0	0	0	0	0	0	0	0	0	0	0	0	0	0	0	0	0	0	0	0	0	0	0							YER044C	0	0	0	0	0	0	0	0	0	0
		YER044C-A	2	7	0	2	2	0	4	0	0	1	1	1	2	4	0	4	1	1	1	1	1	3	0	3	1	0	0	0	0	1							YER044C-A	7.07706e-07	2.6158e-06	0	8.76679e-07	9.80781e-07	0	1.75213e-06	0	0	3.49868e-07
		YER045C	797	754	844	599	543	680	658	705	753	813	695	705	619	646	561	604	744	770	714	688	693	888	562	574	358	252	169	160	497	592							YER045C	0.000282021	0.000281759	0.000293024	0.000262565	0.000266282	0.000272666	0.000288225	0.000291667	0.000294903	0.000284443
		YER046W	915	796	920	690	600	790	704	755	756	832	803	733	694	777	669	634	798	794	641	764	681	824	491	459	347	282	190	200	593	716							YER046W	0.000323775	0.000297454	0.000319411	0.000302454	0.000294234	0.000316774	0.000308374	0.000312353	0.000296078	0.000291091
		YER046W-A	4	10	19	8	8	9	12	12	7	16	1	11	7	9	5	5	4	7	7	5	4	2	0	0	1	1	0	0	1	3							YER046W-A	1.41541e-06	3.73686e-06	6.59652e-06	3.50671e-06	3.92312e-06	3.60882e-06	5.25638e-06	4.96455e-06	2.74147e-06	5.5979e-06
		YER047C	98	153	231	156	125	197	203	222	131	247	190	212	155	208	124	139	128	176	128	132	54	40	47	11	38	43	18	32	29	34							YER047C	3.46776e-05	5.71739e-05	8.01998e-05	6.83809e-05	6.12988e-05	7.8993e-05	8.89205e-05	9.18441e-05	5.13046e-05	8.64175e-05
		YER048C	862	881	958	741	636	722	703	776	837	969	831	816	673	813	702	613	795	847	782	897	677	892	481	560	361	317	190	167	551	627							YER048C	0.000305021	0.000329217	0.000332604	0.000324809	0.000311888	0.000289507	0.000307936	0.000321041	0.000327801	0.000339023
		YER049W	922	838	950	820	694	870	808	731	885	949	872	823	797	859	740	680	994	963	888	925	947	1126	892	879	622	554	357	386	509	651							YER049W	0.000326252	0.000313149	0.000329826	0.000359438	0.000340331	0.000348852	0.00035393	0.000302424	0.0003466	0.000332025
		YER050C	170	156	120	115	98	119	111	120	77	107	113	93	80	108	95	76	15	6	10	9	8	9	8	3	6	9	2	6	330	447							YER050C	6.0155e-05	5.8295e-05	4.16622e-05	5.0409e-05	4.80583e-05	4.77166e-05	4.86215e-05	4.96455e-05	3.01561e-05	3.74359e-05
		YER051W	0	0	0	0	0	0	1	0	0	1	0	1	1	0	0	0	0	0	0	4	1	0	0	1	0	1	0	0	0	0							YER051W	0	0	0	0	0	0	4.38032e-07	0	0	3.49868e-07
		YER052C	7	9	16	13	15	13	15	16	13	16	21	11	16	9	11	13	7	12	5	8	6	4	6	1	2	1	2	1	5	5							YER052C	2.47697e-06	3.36317e-06	5.55497e-06	5.69841e-06	7.35586e-06	5.21274e-06	6.57048e-06	6.6194e-06	5.09129e-06	5.5979e-06
		YER053C	965	822	910	719	675	807	733	773	781	883	853	837	743	812	662	609	865	820	721	867	707	910	521	521	369	288	221	248	492	648							YER053C	0.000341468	0.00030717	0.000315939	0.000315166	0.000331014	0.000323591	0.000321077	0.0003198	0.000305869	0.000308934
		YER053C-A	0	0	0	0	0	0	0	0	0	0	0	0	0	0	0	0	0	0	0	0	0	0	0	0	0	0	0	0	0	0							YER053C-A	0	0	0	0	0	0	0	0	0	0
		YER054C	395	367	368	276	255	336	279	293	316	364	296	277	238	251	274	235	239	170	101	110	84	120	72	78	42	41	15	20	483	668							YER054C	0.000139772	0.000137143	0.000127764	0.000120982	0.00012505	0.000134729	0.000122211	0.000121218	0.000123758	0.000127352
		YER055C	0	0	0	0	0	0	0	0	0	0	0	0	0	0	0	0	0	0	0	0	0	0	0	0	0	0	0	0	0	0							YER055C	0	0	0	0	0	0	0	0	0	0
		YER056C	831	708	794	591	478	624	547	642	667	719	605	642	537	628	601	589	789	763	711	799	738	1050	1021	989	988	900	589	660	494	574							YER056C	0.000294052	0.00026457	0.000275665	0.000259058	0.000234407	0.000250211	0.000239603	0.000265603	0.000261223	0.000251555
		YER056C-A	0	0	0	0	0	0	0	0	0	0	0	0	0	0	0	0	0	0	0	0	0	0	0	0	0	0	0	0	0	0							YER056C-A	0	0	0	0	0	0	0	0	0	0
		YER057C	980	937	1016	743	667	818	795	802	929	1026	868	924	791	863	761	697	966	1034	799	848	807	991	746	597	462	444	264	226	557	679							YER057C	0.000346776	0.000350144	0.00035274	0.000325686	0.00032709	0.000328002	0.000348235	0.000331797	0.000363832	0.000358965
		YER058W	381	359	341	242	254	316	260	294	236	292	279	304	219	280	209	202	48	58	17	29	33	20	22	19	15	17	14	16	498	574							YER058W	0.000134818	0.000134153	0.00011839	0.000106078	0.000124559	0.00012671	0.000113888	0.000121631	9.24266e-05	0.000102162
		YER059W	498	496	534	412	334	447	406	432	425	548	443	441	353	403	370	323	324	294	230	273	279	384	277	295	199	197	141	127	461	583							YER059W	0.000176219	0.000185348	0.000185397	0.000180596	0.00016379	0.000179238	0.000177841	0.000178724	0.000166446	0.000191728
		YER060W	0	0	0	0	0	0	0	0	0	0	0	0	0	0	0	0	0	0	0	0	0	0	0	0	0	0	0	0	0	0							YER060W	0	0	0	0	0	0	0	0	0	0
		YER060W-A	988	889	921	758	620	771	749	777	819	956	832	845	717	796	701	621	825	835	754	862	703	898	568	507	279	302	194	227	527	634							YER060W-A	0.000349607	0.000332207	0.000319758	0.000332261	0.000304042	0.000309155	0.000328086	0.000321454	0.000320752	0.000334474
		YER061C	381	358	366	263	191	238	176	180	183	207	167	171	144	137	230	206	122	104	66	56	19	29	21	8	10	9	8	19	447	586							YER061C	0.000134818	0.00013378	0.00012707	0.000115283	9.36646e-05	9.54332e-05	7.70936e-05	7.44682e-05	7.16698e-05	7.24228e-05
		YER062C	1094	951	1003	885	802	940	823	854	993	1089	980	958	903	968	820	823	976	947	836	837	820	1029	553	568	429	366	212	205	715	880							YER062C	0.000387115	0.000355375	0.000348227	0.00038793	0.000393293	0.000376921	0.0003605	0.00035331	0.000388897	0.000381007
		YER063W	1024	942	1100	803	768	911	852	920	869	1067	1009	950	844	928	828	789	1044	1119	988	1056	857	1182	681	567	388	350	242	217	577	657							YER063W	0.000362345	0.000352012	0.000381904	0.000351986	0.00037662	0.000365293	0.000373203	0.000380615	0.000340333	0.00037331
		YER064C	836	902	807	664	604	839	672	781	842	883	827	802	763	871	713	631	860	784	605	646	456	487	258	234	125	144	115	106	501	691							YER064C	0.000295821	0.000337065	0.000280179	0.000291057	0.000296196	0.000336422	0.000294357	0.000323109	0.000329759	0.000308934
		YER065C	906	787	800	625	520	672	569	652	797	785	677	697	632	723	584	594	734	709	600	657	644	880	461	554	284	260	169	125	476	582							YER065C	0.000320591	0.000294091	0.000277748	0.000273962	0.000255003	0.000269458	0.00024924	0.00026974	0.000312136	0.000274647
		YER066C-A	30	54	59	48	43	41	71	64	46	86	56	52	44	54	53	39	31	58	35	45	15	11	8	9	3	19	5	6	5	11							YER066C-A	1.06156e-05	2.0179e-05	2.04839e-05	2.10403e-05	2.10868e-05	1.64402e-05	3.11003e-05	2.64776e-05	1.80154e-05	3.00887e-05
		YER066W	724	855	858	731	649	817	699	756	690	899	888	833	733	805	753	657	798	788	703	823	466	507	376	145	266	235	137	174	318	356							YER066W	0.00025619	0.000319501	0.000297885	0.000320426	0.000318263	0.000327601	0.000306184	0.000312766	0.00027023	0.000314532
		YER067C-A	843	764	858	756	611	748	687	737	829	955	807	783	712	791	682	603	828	814	683	714	574	703	447	408	239	254	168	178	530	675							YER067C-A	0.000298298	0.000285496	0.000297885	0.000331384	0.000299629	0.000299933	0.000300928	0.000304906	0.000324668	0.000334124
		YER067W	0	3	1	3	2	0	0	1	0	1	0	0	0	5	2	1	1	1	0	0	5	0	1	0	0	1	0	0	2	1							YER067W	0	1.12106e-06	3.47185e-07	1.31502e-06	9.80781e-07	0	0	4.13712e-07	0	3.49868e-07
		YER068C-A	0	0	0	0	0	0	0	0	0	0	0	0	0	0	0	0	0	0	0	0	0	0	0	0	0	0	0	0	0	0							YER068C-A	0	0	0	0	0	0	0	0	0	0
		YER068W	23	27	9	9	4	6	11	10	4	6	2	2	3	6	8	10	2	0	3	2	3	2	0	1	3	12	24	1	146	207							YER068W	8.13862e-06	1.00895e-05	3.12467e-06	3.94505e-06	1.96156e-06	2.40588e-06	4.81835e-06	4.13712e-06	1.56655e-06	2.09921e-06
		YER069W	0	0	0	0	0	0	0	0	0	0	0	0	0	0	0	0	0	0	0	0	0	0	0	0	0	0	0	0	0	0							YER069W	0	0	0	0	0	0	0	0	0	0
		YER070W	43	45	18	44	17	24	17	28	19	24	16	10	9	10	18	24	14	24	44	51	90	84	219	247	518	608	674	330	349	482							YER070W	1.52157e-05	1.68159e-05	6.24934e-06	1.92869e-05	8.33664e-06	9.62352e-06	7.44654e-06	1.15839e-05	7.44112e-06	8.39684e-06
		YER071C	900	788	865	698	641	703	719	774	805	891	813	841	707	737	676	611	790	882	723	822	657	846	559	559	318	317	187	170	579	641							YER071C	0.000318468	0.000294464	0.000300315	0.000305961	0.00031434	0.000281889	0.000314945	0.000320213	0.000315269	0.000311733
		YER072W	472	457	459	403	331	444	369	387	376	384	344	414	341	365	320	342	408	416	480	513	600	705	699	732	861	837	601	628	502	568							YER072W	0.000167019	0.000170774	0.000159358	0.000176651	0.000162319	0.000178035	0.000161634	0.000160107	0.000147256	0.000134349
		YER073W	919	856	933	769	703	776	729	809	845	936	903	849	714	859	660	644	799	795	717	879	878	1066	667	623	358	338	207	233	533	676							YER073W	0.000325191	0.000319875	0.000323924	0.000337083	0.000344745	0.00031116	0.000319325	0.000334693	0.000330934	0.000327477
		YER074W	0	0	0	0	0	0	0	0	0	0	0	0	0	0	0	0	0	0	0	0	0	0	0	0	0	0	0	0	0	0							YER074W	0	0	0	0	0	0	0	0	0	0
		YER075C	674	666	569	454	414	492	462	484	641	648	540	511	485	533	432	431	400	450	342	390	285	356	217	176	164	140	76	103	555	632							YER075C	0.000238497	0.000248875	0.000197548	0.000199006	0.000203022	0.000197282	0.000202371	0.000200237	0.00025104	0.000226715
		YER076C	0	0	0	0	0	0	0	0	0	0	0	0	0	0	0	0	0	0	0	0	0	0	0	0	0	0	0	0	0	0							YER076C	0	0	0	0	0	0	0	0	0	0
		YER077C	0	0	0	0	0	0	0	0	0	0	0	0	0	0	0	0	0	0	0	0	0	0	0	0	0	0	0	0	0	0							YER077C	0	0	0	0	0	0	0	0	0	0
		YER078C	966	879	1078	832	730	874	783	882	982	982	940	920	768	868	755	664	907	923	818	837	704	885	367	409	161	152	53	75	554	591							YER078C	0.000341822	0.00032847	0.000374266	0.000364698	0.000357985	0.000350456	0.000342979	0.000364894	0.000384589	0.000343571
		YER079W	898	888	952	703	621	821	753	769	877	947	879	855	760	851	765	646	837	815	709	763	751	878	571	548	419	371	189	219	573	706							YER079W	0.00031776	0.000331833	0.00033052	0.000308152	0.000304533	0.000329204	0.000329838	0.000318145	0.000343467	0.000331325
		YER080W	1034	947	1068	794	735	826	875	864	947	1073	1114	930	795	907	831	719	1014	984	857	937	867	1125	753	627	480	350	284	239	688	827							YER080W	0.000365884	0.00035388	0.000370794	0.000348041	0.000360437	0.000331209	0.000383278	0.000357447	0.000370881	0.000375409
		YER081W	986	929	979	818	750	916	815	971	976	1090	985	1119	777	938	826	810	1064	943	886	1023	798	1053	691	673	476	459	256	256	701	770							YER081W	0.000348899	0.000347154	0.000339894	0.000358562	0.000367793	0.000367298	0.000356996	0.000401715	0.000382239	0.000381357
		YER083C	182	167	193	151	97	126	105	122	86	116	102	129	89	79	78	85	39	38	38	33	19	18	18	17	14	19	8	12	334	460							YER083C	6.44012e-05	6.24055e-05	6.70068e-05	6.61892e-05	4.75679e-05	5.05235e-05	4.59933e-05	5.04729e-05	3.36809e-05	4.05847e-05
		YER084W	642	539	568	530	441	603	580	538	519	655	559	657	450	497	445	476	534	502	341	404	380	418	321	230	217	174	97	111	582	685							YER084W	0.000227174	0.000201417	0.000197201	0.00023232	0.000216262	0.000241791	0.000254058	0.000222577	0.00020326	0.000229164
		YER085C	883	857	909	704	637	792	811	709	851	919	863	819	737	818	683	662	828	898	746	836	735	917	613	597	394	351	229	213	570	615							YER085C	0.000312452	0.000320249	0.000315591	0.000308591	0.000312379	0.000317576	0.000355244	0.000293322	0.000333284	0.000321529
		YER086W	0	0	0	0	1	0	0	0	0	0	0	0	0	0	0	0	0	0	0	0	0	0	0	0	0	0	0	0	0	0							YER086W	0	0	0	0	4.90391e-07	0	0	0	0	0
		YER087C-A	1026	889	1034	762	675	811	832	844	900	1020	933	909	852	872	782	746	1010	1062	951	1011	922	1059	671	575	468	340	180	206	559	757							YER087C-A	0.000363053	0.000332207	0.00035899	0.000334015	0.000331014	0.000325195	0.000364443	0.000349173	0.000352474	0.000356866
		YER087C-B	0	0	0	0	0	0	0	0	0	0	0	0	0	0	0	0	0	0	0	0	0	0	0	0	0	0	0	0	0	0							YER087C-B	0	0	0	0	0	0	0	0	0	0
		YER087W	55	55	46	26	12	20	12	8	3	6	1	1	2	2	16	18	3	0	2	0	0	1	0	0	0	0	0	0	359	435							YER087W	1.94619e-05	2.05527e-05	1.59705e-05	1.13968e-05	5.88469e-06	8.0196e-06	5.25638e-06	3.3097e-06	1.17491e-06	2.09921e-06
		YER088C	910	868	966	729	688	890	804	825	961	1018	973	984	784	949	738	758	698	771	606	685	583	656	408	423	257	244	133	145	475	627							YER088C	0.000322006	0.000324359	0.000335381	0.000319549	0.000337389	0.000356872	0.000352178	0.000341313	0.000376364	0.000356166
		YER089C	1057	1016	1058	866	790	961	876	924	1004	1135	1073	1010	912	960	873	787	939	988	797	887	750	901	540	551	316	329	216	224	616	820							YER089C	0.000374023	0.000379665	0.000367322	0.000379602	0.000387409	0.000385342	0.000383716	0.00038227	0.000393205	0.000397101
		YER090W	1019	994	1064	925	801	1005	811	881	901	990	827	842	617	676	782	781	1097	1075	937	986	882	1160	834	660	591	509	296	295	628	714							YER090W	0.000360576	0.000371444	0.000369405	0.000405464	0.000392803	0.000402985	0.000355244	0.00036448	0.000352866	0.00034637
		YER091C	772	736	799	609	570	667	653	650	719	789	707	696	634	706	597	501	676	727	542	615	597	727	453	463	321	270	173	132	425	512							YER091C	0.000273174	0.000275033	0.000277401	0.000266949	0.000279523	0.000267454	0.000286035	0.000268913	0.000281588	0.000276046
		YER091C-A	1002	926	1033	832	671	918	839	852	938	1004	1023	914	880	896	833	764	885	982	825	884	785	930	579	544	397	338	228	190	655	781							YER091C-A	0.000354561	0.000346033	0.000358642	0.000364698	0.000329052	0.000368099	0.000367509	0.000352483	0.000367356	0.000351268
		YER092W	707	644	580	486	479	492	462	542	439	563	490	489	386	477	439	424	719	626	1273	1330	1430	1595	897	879	350	322	152	161	424	535							YER092W	0.000250174	0.000240654	0.000201367	0.000213033	0.000234897	0.000197282	0.000202371	0.000224232	0.000171929	0.000196976
		YER093C-A	676	575	649	497	438	517	518	544	520	586	497	456	412	440	413	390	469	503	434	452	446	513	528	472	523	474	385	403	429	571							YER093C-A	0.000239205	0.000214869	0.000225323	0.000217855	0.000214791	0.000207307	0.0002269	0.000225059	0.000203652	0.000205023
		YER095W	0	0	0	0	0	0	0	0	0	0	0	0	0	0	0	0	0	0	0	0	0	0	0	0	0	0	0	0	0	0							YER095W	0	0	0	0	0	0	0	0	0	0
		YER096W	13	6	12	7	6	7	2	10	1	11	6	6	1	2	8	3	4	9	2	2	4	6	1	6	3	0	0	3	8	6							YER096W	4.60009e-06	2.24211e-06	4.16622e-06	3.06837e-06	2.94234e-06	2.80686e-06	8.76064e-07	4.13712e-06	3.91638e-07	3.84855e-06
		YER097W	784	788	905	660	644	780	749	728	755	947	823	755	669	797	645	617	629	765	543	664	450	537	353	201	205	213	142	124	375	398							YER097W	0.000277421	0.000294464	0.000314203	0.000289304	0.000315812	0.000312764	0.000328086	0.000301183	0.000295687	0.000331325
		YER098W	990	936	919	736	708	884	735	880	894	1023	905	862	748	916	729	712	791	895	693	766	617	837	501	533	339	312	211	247	548	638							YER098W	0.000350314	0.00034977	0.000319063	0.000322618	0.000347197	0.000354466	0.000321953	0.000364067	0.000350124	0.000357915
		YER099C	0	0	0	0	0	0	0	0	0	0	0	0	0	0	0	0	0	0	0	0	0	0	0	0	0	0	0	0	0	0							YER099C	0	0	0	0	0	0	0	0	0	0
		YER101C	0	0	0	0	0	0	0	0	0	0	0	0	0	0	0	0	0	0	0	0	0	0	0	1	0	0	0	0	0	0							YER101C	0	0	0	0	0	0	0	0	0	0
		YER103W	0	0	0	0	0	0	0	0	0	0	0	0	0	0	0	0	0	0	0	0	0	0	0	0	0	0	0	0	0	0							YER103W	0	0	0	0	0	0	0	0	0	0
		YER105C	0	0	0	0	0	0	0	0	0	0	0	0	0	0	0	0	0	0	0	0	0	0	0	0	0	0	0	0	0	0							YER105C	0	0	0	0	0	0	0	0	0	0
		YER106W	0	0	0	0	0	0	0	0	0	0	0	0	0	1	0	0	0	0	0	0	0	0	0	0	0	1	0	0	0	0							YER106W	0	0	0	0	0	0	0	0	0	0
		YER107C	0	0	0	0	0	0	0	0	0	0	0	0	0	0	0	0	0	0	0	0	0	0	0	0	0	0	1	0	0	0							YER107C	0	0	0	0	0	0	0	0	0	0
		YER108C	0	0	0	0	0	0	0	0	0	0	0	0	0	0	0	0	0	0	0	0	0	0	0	0	0	0	0	0	0	0							YER108C	0	0	0	0	0	0	0	0	0	0
		YER109C	0	0	0	0	0	0	0	0	0	0	0	0	0	0	0	0	0	0	0	0	0	0	0	0	0	0	0	0	0	0							YER109C	0	0	0	0	0	0	0	0	0	0
		YER110C	0	0	0	0	0	0	0	0	0	0	0	0	0	0	0	0	0	0	0	0	0	0	0	0	0	0	0	0	0	0							YER110C	0	0	0	0	0	0	0	0	0	0
		YER111C	0	0	0	0	0	0	0	0	0	0	0	0	0	0	1	0	0	0	0	0	0	0	0	0	0	0	0	0	0	0							YER111C	0	0	0	0	0	0	0	0	0	0
		YER113C	0	0	0	0	0	0	0	0	0	0	0	0	0	0	0	0	0	0	0	0	0	0	0	0	0	0	0	0	0	0							YER113C	0	0	0	0	0	0	0	0	0	0
		YER114C	0	0	0	0	0	0	0	0	0	0	0	0	0	0	0	0	0	0	0	0	0	0	0	0	0	0	0	0	0	0							YER114C	0	0	0	0	0	0	0	0	0	0
		YER115C	0	0	0	0	0	0	0	0	0	0	0	0	0	0	0	0	0	0	0	0	0	0	0	0	0	0	0	0	0	0							YER115C	0	0	0	0	0	0	0	0	0	0
		YER116C	0	0	0	0	0	0	0	0	0	0	0	0	0	0	0	0	0	0	0	0	0	0	0	0	0	0	0	0	0	0							YER116C	0	0	0	0	0	0	0	0	0	0
		YER117W	0	0	0	0	0	0	0	0	1	0	0	0	0	0	0	0	0	0	0	0	0	0	0	0	0	0	0	0	0	1							YER117W	0	0	0	0	0	0	0	0	3.91638e-07	0
		YER118C	0	0	0	0	0	0	0	0	0	0	0	0	0	0	0	0	0	0	0	0	0	0	0	0	0	0	0	0	0	0							YER118C	0	0	0	0	0	0	0	0	0	0
		YER119C	0	0	0	0	0	0	0	0	0	0	0	0	0	0	0	0	0	0	0	0	0	0	0	0	0	0	0	0	0	0							YER119C	0	0	0	0	0	0	0	0	0	0
		YER119C-A	0	0	0	0	0	0	0	0	1	0	0	0	0	0	0	0	0	0	0	0	0	0	0	0	0	0	0	0	0	0							YER119C-A	0	0	0	0	0	0	0	0	3.91638e-07	0
		YER120W	0	0	0	0	0	0	0	1	0	0	0	0	0	0	0	0	0	0	0	0	0	0	0	0	0	0	0	0	0	0							YER120W	0	0	0	0	0	0	0	4.13712e-07	0	0
		YER121W	0	0	0	0	0	0	0	0	0	0	0	0	0	0	0	0	0	0	0	0	0	0	0	0	0	0	0	0	0	0							YER121W	0	0	0	0	0	0	0	0	0	0
		YER122C	3	3	1	1	2	1	1	2	1	4	0	3	3	7	1	1	2	1	0	1	2	0	5	2	1	2	7	7	40	63							YER122C	1.06156e-06	1.12106e-06	3.47185e-07	4.38339e-07	9.80781e-07	4.0098e-07	4.38032e-07	8.27424e-07	3.91638e-07	1.39947e-06
		YER123W	0	0	0	0	0	0	0	0	0	0	0	0	0	0	0	0	0	0	0	0	0	0	0	0	0	0	0	0	0	0							YER123W	0	0	0	0	0	0	0	0	0	0
		YER124C	1	0	2	0	1	2	0	1	1	0	0	1	2	0	0	1	0	3	2	1	0	1	0	1	0	0	0	0	0	2							YER124C	3.53853e-07	0	6.94371e-07	0	4.90391e-07	8.0196e-07	0	4.13712e-07	3.91638e-07	0
		YER128W	0	0	0	0	0	0	0	0	0	0	0	0	0	0	0	0	0	0	0	0	0	0	0	0	0	0	0	0	0	0							YER128W	0	0	0	0	0	0	0	0	0	0
		YER129W	0	0	0	0	0	0	0	0	0	0	0	0	0	0	0	0	0	0	0	0	0	0	0	0	0	0	0	0	0	0							YER129W	0	0	0	0	0	0	0	0	0	0
		YER130C	0	0	0	0	0	0	0	0	0	0	0	0	0	0	0	0	0	0	0	0	0	0	0	0	0	0	0	0	0	0							YER130C	0	0	0	0	0	0	0	0	0	0
		YER131W	0	0	0	0	0	0	0	0	0	0	0	0	0	0	0	0	0	0	0	0	0	0	0	0	0	0	0	0	0	0							YER131W	0	0	0	0	0	0	0	0	0	0
		YER132C	0	0	0	0	0	0	0	0	0	0	0	0	0	0	0	0	0	0	0	0	0	0	0	0	0	0	0	0	0	0							YER132C	0	0	0	0	0	0	0	0	0	0
		YER134C	0	0	0	0	0	0	0	0	0	0	0	0	0	0	0	0	0	0	0	0	0	0	0	0	0	0	0	0	0	0							YER134C	0	0	0	0	0	0	0	0	0	0
		YER135C	0	0	0	0	0	0	0	0	0	0	0	0	0	0	0	0	0	0	0	0	0	0	0	0	0	0	0	0	0	0							YER135C	0	0	0	0	0	0	0	0	0	0
		YER137C	0	0	0	0	0	0	0	0	0	0	0	0	0	0	0	0	0	0	0	0	0	0	0	0	0	0	0	0	0	0							YER137C	0	0	0	0	0	0	0	0	0	0
		YER139C	0	0	0	0	0	0	0	0	0	0	0	0	0	0	0	0	0	0	0	0	0	0	0	0	0	0	0	0	0	0							YER139C	0	0	0	0	0	0	0	0	0	0
		YER140W	0	0	0	0	0	0	0	0	0	0	0	0	0	0	0	0	0	0	0	0	0	0	0	0	0	0	0	0	0	0							YER140W	0	0	0	0	0	0	0	0	0	0
		YER141W	0	0	0	0	0	0	0	0	0	0	0	0	0	0	0	0	0	0	0	0	0	0	0	0	0	0	0	0	0	0							YER141W	0	0	0	0	0	0	0	0	0	0
		YER142C	0	0	0	0	0	0	0	0	0	0	0	0	1	0	0	0	0	0	0	0	0	0	0	0	0	0	0	0	0	0							YER142C	0	0	0	0	0	0	0	0	0	0
		YER143W	0	0	0	0	0	0	0	0	0	0	0	0	0	0	0	0	0	0	0	0	0	0	0	0	0	0	0	0	0	0							YER143W	0	0	0	0	0	0	0	0	0	0
		YER144C	875	833	940	705	643	801	713	807	838	922	892	991	797	830	733	660	841	968	785	922	797	1075	690	648	480	453	242	276	614	805							YER144C	0.000309621	0.00031128	0.000326354	0.000309029	0.000315321	0.000321185	0.000312317	0.000333866	0.000328193	0.000322579
		YER145C	0	0	0	0	0	0	0	0	0	0	0	0	0	0	0	0	0	0	0	0	0	0	0	0	0	0	0	0	0	0							YER145C	0	0	0	0	0	0	0	0	0	0
		YER149C	0	0	0	0	0	0	0	0	0	0	0	0	0	0	0	0	0	0	0	0	0	0	0	0	0	0	0	0	0	0							YER149C	0	0	0	0	0	0	0	0	0	0
		YER150W	0	0	0	0	0	0	0	0	0	0	0	0	0	0	0	0	0	0	0	0	0	0	0	0	0	0	0	0	0	0							YER150W	0	0	0	0	0	0	0	0	0	0
		YER151C	0	0	0	0	0	0	0	0	0	0	0	0	0	0	0	0	0	0	0	0	0	0	0	0	0	0	0	0	0	0							YER151C	0	0	0	0	0	0	0	0	0	0
		YER152C	0	0	0	0	0	0	0	0	0	0	0	0	0	0	0	0	0	0	0	0	0	0	0	0	0	0	0	0	0	0							YER152C	0	0	0	0	0	0	0	0	0	0
		YER153C	0	0	0	0	0	0	0	0	0	0	0	0	0	0	0	0	0	0	0	0	0	0	0	0	0	0	0	0	0	0							YER153C	0	0	0	0	0	0	0	0	0	0
		YER154W	0	0	0	0	0	0	0	0	0	0	0	0	0	0	0	0	0	0	0	0	0	0	0	0	0	0	0	0	0	0							YER154W	0	0	0	0	0	0	0	0	0	0
		YER155C	0	0	0	0	0	0	0	0	0	0	0	0	0	0	0	0	0	0	0	0	0	0	0	0	0	0	0	0	0	0							YER155C	0	0	0	0	0	0	0	0	0	0
		YER156C	0	0	0	0	0	0	0	0	0	0	0	0	0	0	0	0	0	0	0	0	0	0	0	0	0	0	0	0	0	0							YER156C	0	0	0	0	0	0	0	0	0	0
		YER158C	0	0	0	0	0	0	0	0	0	0	0	0	0	0	0	0	0	0	0	0	0	0	0	0	0	0	0	0	0	0							YER158C	0	0	0	0	0	0	0	0	0	0
		YER161C	0	0	0	0	0	0	0	0	0	0	0	0	0	0	0	0	0	0	0	0	0	0	0	0	0	0	0	0	0	1							YER161C	0	0	0	0	0	0	0	0	0	0
		YER162C	0	0	0	0	0	0	0	0	0	0	0	0	0	1	0	0	0	0	0	0	0	0	0	0	0	0	0	0	0	0							YER162C	0	0	0	0	0	0	0	0	0	0
		YER163C	0	0	0	1	0	0	0	0	0	0	0	0	0	0	0	0	0	0	0	0	0	0	0	0	0	0	0	0	0	0							YER163C	0	0	0	4.38339e-07	0	0	0	0	0	0
		YER164W	0	0	1	0	0	0	0	0	0	0	0	0	0	0	0	0	0	0	0	0	0	0	0	0	0	0	0	0	0	0							YER164W	0	0	3.47185e-07	0	0	0	0	0	0	0
		YER166W	0	1	0	0	0	0	0	0	0	0	0	0	0	0	0	0	0	0	0	0	0	0	0	0	0	0	0	0	0	0							YER166W	0	3.73686e-07	0	0	0	0	0	0	0	0
		YER167W	0	0	0	0	0	0	0	0	0	0	0	0	0	0	0	0	1	0	0	0	0	0	0	0	0	0	0	0	0	0							YER167W	0	0	0	0	0	0	0	0	0	0
		YER169W	0	0	0	0	0	0	0	0	0	0	0	0	0	0	0	0	0	0	0	0	0	0	0	0	0	0	0	0	0	0							YER169W	0	0	0	0	0	0	0	0	0	0
		YER170W	0	0	0	0	0	0	0	0	0	0	0	0	0	0	0	0	0	1	0	0	0	0	0	0	0	0	0	0	0	0							YER170W	0	0	0	0	0	0	0	0	0	0
		YER173W	0	0	0	0	0	0	0	0	0	0	0	0	0	0	0	0	0	0	0	0	0	0	0	0	0	0	0	0	0	0							YER173W	0	0	0	0	0	0	0	0	0	0
		YER174C	0	0	0	0	0	0	0	0	0	0	0	0	0	0	0	0	0	0	0	0	0	0	0	0	0	0	0	0	0	0							YER174C	0	0	0	0	0	0	0	0	0	0
		YER175C	778	696	761	569	523	622	653	582	674	764	712	681	644	684	585	554	685	609	559	572	489	629	433	419	253	208	138	156	503	634							YER175C	0.000275298	0.000260085	0.000264208	0.000249415	0.000256474	0.000249409	0.000286035	0.000240781	0.000263964	0.0002673
		YER175W-A	0	0	0	0	0	0	0	0	0	0	0	0	0	0	0	0	0	0	0	0	0	0	0	0	0	0	0	0	0	0							YER175W-A	0	0	0	0	0	0	0	0	0	0
		YER176W	850	777	872	637	586	705	647	699	725	854	776	677	654	746	629	554	862	833	671	786	810	935	623	551	353	325	222	235	504	533							YER176W	0.000300775	0.000290354	0.000302746	0.000279222	0.000287369	0.000282691	0.000283407	0.000289185	0.000283938	0.000298788
		YER177W	373	376	464	329	272	328	280	326	343	348	299	289	248	286	268	282	201	231	145	146	173	210	109	122	78	116	46	55	616	713							YER177W	0.000131987	0.000140506	0.000161094	0.000144214	0.000133386	0.000131521	0.000122649	0.00013487	0.000134332	0.000121754
		YER178W	554	546	524	394	295	367	261	276	270	308	237	281	218	236	330	335	275	252	197	170	109	111	54	23	22	19	21	12	475	610							YER178W	0.000196035	0.000204032	0.000181925	0.000172706	0.000144665	0.00014716	0.000114326	0.000114185	0.000105742	0.000107759
		YER179W	990	967	1123	827	769	899	816	868	949	1146	996	1028	861	874	871	764	990	1028	778	911	759	952	607	551	363	361	189	214	640	684							YER179W	0.000350314	0.000361354	0.000389889	0.000362507	0.00037711	0.000360481	0.000357434	0.000359102	0.000371665	0.000400949
		YER180C	2009	2054	2312	1790	1556	1946	1738	1823	2056	2204	2146	2117	1775	2019	1777	1573	1996	2064	1938	1927	1725	2070	1354	1260	922	795	497	529	1240	1451							YER180C	0.00071089	0.000767551	0.000802692	0.000784627	0.000763048	0.000780307	0.000761299	0.000754197	0.000805208	0.00077111
		YER180C-A	0	0	0	0	0	0	0	0	0	0	0	0	0	0	0	0	0	0	0	0	0	0	0	0	0	0	0	0	0	0							YER180C-A	0	0	0	0	0	0	0	0	0	0
		YER181C	1083	1024	1114	849	786	1009	870	953	949	1083	1032	1030	880	981	865	794	948	1035	845	944	787	1004	704	647	420	393	319	280	624	736							YER181C	0.000383223	0.000382654	0.000386764	0.00037215	0.000385447	0.000404589	0.000381088	0.000394268	0.000371665	0.000378908
		YER182W	752	707	801	628	551	692	617	646	643	815	746	734	608	682	649	578	725	750	611	747	595	734	464	440	257	213	136	146	450	529							YER182W	0.000266097	0.000264196	0.000278095	0.000275277	0.000270205	0.000277478	0.000270266	0.000267258	0.000251823	0.000285143
		YER183C	990	788	1027	753	666	862	777	786	805	989	917	917	766	840	679	695	940	895	657	824	669	864	558	570	366	302	223	253	485	613							YER183C	0.000350314	0.000294464	0.000356559	0.000330069	0.0003266	0.000345645	0.000340351	0.000325178	0.000315269	0.00034602
		YER184C	906	805	889	718	688	748	714	701	763	868	817	768	707	713	607	565	897	871	717	842	735	916	559	536	461	368	229	224	489	580							YER184C	0.000320591	0.000300817	0.000308648	0.000314728	0.000337389	0.000299933	0.000312755	0.000290012	0.00029882	0.000303686
		YER185W	953	955	1074	781	743	843	805	842	863	1018	962	900	847	795	741	663	915	1043	865	831	871	986	625	576	399	376	226	179	531	681							YER185W	0.000337222	0.00035687	0.000372877	0.000342343	0.00036436	0.000338026	0.000352616	0.000348346	0.000337984	0.000356166
		YER186C	1004	848	1112	735	719	937	836	820	881	979	946	922	801	849	819	719	976	985	847	858	720	884	535	474	402	323	254	198	577	811							YER186C	0.000355268	0.000316886	0.00038607	0.000322179	0.000352591	0.000375718	0.000366195	0.000339244	0.000345033	0.000342521
		YER186W-A	0	0	0	0	0	0	0	0	0	0	0	0	0	0	0	0	0	0	0	0	0	0	0	0	0	0	0	0	0	0							YER186W-A	0	0	0	0	0	0	0	0	0	0
		YER187W	817	758	910	679	597	714	645	701	702	813	837	740	716	688	622	576	760	773	613	719	596	712	438	465	294	230	169	169	474	621							YER187W	0.000289098	0.000283254	0.000315939	0.000297632	0.000292763	0.0002863	0.000282531	0.000290012	0.00027493	0.000284443
		YER188W	798	822	936	811	617	803	714	789	759	904	839	883	779	840	725	649	784	886	695	761	706	819	543	405	373	299	160	188	569	666							YER188W	0.000282375	0.00030717	0.000324965	0.000355493	0.000302571	0.000321987	0.000312755	0.000326419	0.000297253	0.000316281
		YFL001W	299	232	250	215	147	191	172	221	169	223	179	172	119	171	176	148	78	73	31	48	37	81	83	66	86	37	31	32	601	736							YFL001W	0.000105802	8.66951e-05	8.67963e-05	9.42429e-05	7.20874e-05	7.65871e-05	7.53415e-05	9.14304e-05	6.61868e-05	7.80207e-05
		YFL003C	1020	941	1059	849	706	804	778	868	835	1024	965	953	846	910	849	775	961	989	789	886	705	985	644	580	386	325	216	311	564	696							YFL003C	0.00036093	0.000351638	0.000367669	0.00037215	0.000346216	0.000322388	0.000340789	0.000359102	0.000327018	0.000358265
		YFL004W	1140	1114	1251	802	802	999	886	925	960	1083	1159	1083	982	1020	934	867	1179	1148	960	1055	953	1241	854	724	461	451	299	329	727	791							YFL004W	0.000403392	0.000416286	0.000434329	0.000351548	0.000393293	0.000400579	0.000388096	0.000382684	0.000375973	0.000378908
		YFL006W	909	871	877	651	621	842	676	667	703	876	747	880	785	795	677	648	698	690	596	617	589	703	400	364	255	218	123	148	531	614							YFL006W	0.000321652	0.00032548	0.000304482	0.000285359	0.000304533	0.000337625	0.00029611	0.000275946	0.000275322	0.000306485
		YFL007W	1015	978	1048	775	694	850	763	795	862	966	1009	933	842	867	829	836	776	804	646	726	710	844	464	469	314	252	164	146	624	693							YFL007W	0.000359161	0.000365465	0.00036385	0.000339713	0.000340331	0.000340833	0.000334218	0.000328901	0.000337592	0.000337973
		YFL010C	1213	1013	1285	923	867	972	957	982	1109	1170	1098	1062	1048	1031	990	838	1143	1207	928	1017	940	1191	745	750	506	379	433	298	582	717							YFL010C	0.000429224	0.000378544	0.000446133	0.000404587	0.000425169	0.000389752	0.000419196	0.000406265	0.000434327	0.000409346
		YFL010W-A	0	0	0	0	0	0	0	0	0	0	0	0	0	0	0	0	0	0	0	0	0	0	0	0	0	0	0	0	0	0							YFL010W-A	0	0	0	0	0	0	0	0	0	0
		YFL011W	997	907	973	812	693	889	776	797	816	995	921	1000	903	869	777	721	1006	951	748	867	774	1097	643	614	394	438	248	267	566	687							YFL011W	0.000352791	0.000338933	0.000337811	0.000355931	0.000339841	0.000356471	0.000339913	0.000329729	0.000319577	0.000348119
		YFL012W	1861	1754	1922	1479	1207	1617	1528	1511	1666	1927	1763	1738	1580	1594	1513	1357	1844	2012	1543	1759	1397	1844	1156	947	747	651	357	409	1050	1341							YFL012W	0.00065852	0.000655445	0.00066729	0.000648304	0.000591901	0.000648384	0.000669313	0.000625119	0.000652469	0.000674197
		YFL013C	982	833	902	688	597	703	667	679	698	792	808	825	710	770	720	635	979	915	1046	1141	1108	1266	851	750	494	489	259	286	503	603							YFL013C	0.000347484	0.00031128	0.000313161	0.000301577	0.000292763	0.000281889	0.000292167	0.000280911	0.000273363	0.000277096
		YFL013W-A	1020	846	926	699	603	771	686	783	807	914	859	722	691	789	701	653	1011	964	1192	1199	1037	1290	859	667	532	473	240	228	585	652							YFL013W-A	0.00036093	0.000316138	0.000321494	0.000306399	0.000295706	0.000309155	0.00030049	0.000323937	0.000316052	0.00031978
		YFL014W	0	0	0	0	0	0	0	0	0	0	0	0	0	0	0	0	0	0	0	0	0	0	0	0	0	0	0	0	0	0							YFL014W	0	0	0	0	0	0	0	0	0	0
		YFL015C	964	883	900	784	601	799	730	752	726	934	945	842	740	734	706	670	867	873	739	888	672	918	560	617	348	336	221	209	488	599							YFL015C	0.000341114	0.000329965	0.000312467	0.000343658	0.000294725	0.000320383	0.000319763	0.000311112	0.000284329	0.000326777
		YFL016C	143	130	84	68	32	59	33	37	24	30	13	20	16	10	49	39	6	5	2	7	3	3	0	2	0	0	0	0	372	480							YFL016C	5.0601e-05	4.85792e-05	2.91636e-05	2.98071e-05	1.56925e-05	2.36578e-05	1.44551e-05	1.53074e-05	9.39931e-06	1.04961e-05
		YFL018C	698	632	571	475	279	325	258	292	268	362	250	254	203	253	354	349	196	188	114	124	41	54	25	16	16	6	13	4	590	648							YFL018C	0.000246989	0.000236169	0.000198243	0.000208211	0.000136819	0.000130318	0.000113012	0.000120804	0.000104959	0.000126652
		YFL019C	1067	1104	1218	860	750	1009	831	921	952	1036	997	948	897	998	965	850	1091	1046	933	954	921	1148	657	699	417	414	235	227	613	783							YFL019C	0.000377561	0.000412549	0.000422872	0.000376972	0.000367793	0.000404589	0.000364004	0.000381029	0.000372839	0.000362464
		YFL020C	0	0	0	0	0	0	0	0	0	0	0	0	0	0	0	0	0	0	0	0	0	0	0	0	0	0	0	0	0	0							YFL020C	0	0	0	0	0	0	0	0	0	0
		YFL021W	0	0	0	0	0	0	0	0	0	0	0	0	0	0	0	0	0	0	0	0	0	0	0	1	0	0	0	0	0	0							YFL021W	0	0	0	0	0	0	0	0	0	0
		YFL023W	0	0	0	0	0	0	0	0	0	0	0	0	0	0	0	0	0	0	0	0	0	0	0	0	0	0	0	0	0	0							YFL023W	0	0	0	0	0	0	0	0	0	0
		YFL025C	290	246	253	223	177	223	199	231	217	210	221	182	149	174	145	120	61	98	56	48	33	30	20	15	11	17	3	10	648	794							YFL025C	0.000102617	9.19267e-05	8.78379e-05	9.77497e-05	8.67991e-05	8.94185e-05	8.71683e-05	9.55675e-05	8.49855e-05	7.34724e-05
		YFL026W	0	0	0	0	0	0	0	0	0	0	0	0	0	0	0	0	0	0	0	0	0	0	0	0	0	0	0	0	0	0							YFL026W	0	0	0	0	0	0	0	0	0	0
		YFL027C	995	898	1110	734	704	790	777	781	840	946	924	796	755	804	803	700	1021	992	834	909	718	933	589	570	325	320	165	220	609	716							YFL027C	0.000352084	0.00033557	0.000385376	0.000321741	0.000345235	0.000316774	0.000340351	0.000323109	0.000328976	0.000330976
		YFL028C	892	736	763	622	530	630	557	588	671	646	676	598	558	570	652	555	1131	1002	849	954	1088	1435	1114	1053	925	829	575	573	467	531							YFL028C	0.000315637	0.000275033	0.000264902	0.000272647	0.000259907	0.000252617	0.000243984	0.000243263	0.000262789	0.000226015
		YFL030W	647	599	713	554	417	606	525	615	601	706	680	657	576	616	563	555	645	687	611	602	537	623	388	484	291	217	147	152	479	528							YFL030W	0.000228943	0.000223838	0.000247543	0.00024284	0.000204493	0.000242994	0.000229967	0.000254433	0.000235374	0.000247007
		YFL031W	0	0	0	0	0	0	0	0	0	0	0	0	0	0	0	0	0	0	0	0	0	0	0	0	0	0	0	0	0	0							YFL031W	0	0	0	0	0	0	0	0	0	0
		YFL032W	765	779	921	666	538	771	650	691	657	973	812	746	696	788	668	641	854	809	711	737	666	803	557	345	461	391	207	187	482	528							YFL032W	0.000270697	0.000291101	0.000319758	0.000291934	0.00026383	0.000309155	0.000284721	0.000285875	0.000257306	0.000340422
		YFL033C	1369	1229	1279	990	871	1163	1051	1146	1258	1550	1477	1450	1376	1719	1036	1017	2227	2180	7845	7423	14433	17516	22332	23217	26410	25289	25258	21626	906	1105							YFL033C	0.000484425	0.00045926	0.00044405	0.000433956	0.00042713	0.00046634	0.000460371	0.000474114	0.000492681	0.000542296
		YFL034C-A	845	823	926	643	631	776	668	660	786	846	885	771	730	800	739	638	868	880	728	821	792	1010	630	577	436	361	207	205	665	692							YFL034C-A	0.000299006	0.000307543	0.000321494	0.000281852	0.000309436	0.00031116	0.000292605	0.00027305	0.000307828	0.000295989
		YFL034W	759	704	851	618	556	743	636	644	658	874	777	742	705	750	617	572	787	699	603	692	600	654	351	483	296	278	157	173	550	762							YFL034W	0.000268574	0.000263075	0.000295455	0.000270894	0.000272657	0.000297928	0.000278588	0.000266431	0.000257698	0.000305785
		YFL035C-B	922	856	1071	763	670	923	701	760	821	1035	872	865	739	820	755	732	962	885	761	842	854	988	579	542	429	367	205	195	557	845							YFL035C-B	0.000326252	0.000319875	0.000371835	0.000334453	0.000328562	0.000370104	0.00030706	0.000314421	0.000321535	0.000362114
		YFL036W	4	3	3	3	2	6	2	1	1	0	0	2	0	0	1	0	0	0	0	0	0	0	0	0	0	0	0	0	53	70							YFL036W	1.41541e-06	1.12106e-06	1.04156e-06	1.31502e-06	9.80781e-07	2.40588e-06	8.76064e-07	4.13712e-07	3.91638e-07	0
		YFL040W	928	809	982	772	615	817	694	705	733	879	854	795	739	837	717	660	915	866	710	727	668	799	614	499	365	316	182	189	651	806							YFL040W	0.000328376	0.000302312	0.000340936	0.000338398	0.00030159	0.000327601	0.000303994	0.000291667	0.000287071	0.000307534
		YFL041W	859	812	1014	613	605	847	650	698	670	868	740	760	682	787	665	630	857	765	650	729	592	807	399	423	229	183	155	127	644	739							YFL041W	0.00030396	0.000303433	0.000352046	0.000268702	0.000296686	0.00033963	0.000284721	0.000288771	0.000262397	0.000303686
		YFL041W-A	0	0	0	0	0	0	0	0	0	0	0	0	0	0	0	0	0	0	0	0	0	0	0	0	0	0	0	0	0	0							YFL041W-A	0	0	0	0	0	0	0	0	0	0
		YFL042C	0	0	0	0	0	0	0	0	0	0	0	0	0	0	0	0	0	0	0	0	0	0	0	0	0	0	0	0	0	0							YFL042C	0	0	0	0	0	0	0	0	0	0
		YFL043C	0	0	0	0	0	0	0	1	0	0	0	0	0	0	0	0	0	0	0	0	0	0	0	0	0	0	0	0	0	0							YFL043C	0	0	0	0	0	0	0	4.13712e-07	0	0
		YFL044C	1062	921	1101	803	756	864	869	867	934	1219	1112	1023	954	1055	908	802	1453	1421	1846	1998	2279	2718	2016	1945	1781	1519	1023	899	766	918							YFL044C	0.000375792	0.000344165	0.000382251	0.000351986	0.000370735	0.000346447	0.00038065	0.000358689	0.00036579	0.00042649
		YFL046W	0	0	0	0	0	0	0	0	0	0	0	0	0	0	0	0	0	0	0	0	0	0	0	0	0	0	0	0	0	0							YFL046W	0	0	0	0	0	0	0	0	0	0
		YFL047W	0	0	0	0	0	0	0	0	0	0	0	0	0	0	0	0	0	0	0	0	0	0	0	0	0	0	0	0	0	0							YFL047W	0	0	0	0	0	0	0	0	0	0
		YFL048C	884	815	934	707	587	720	750	767	714	840	850	779	683	706	696	653	912	981	863	953	891	1044	689	642	392	342	218	203	578	654							YFL048C	0.000312806	0.000304554	0.000324271	0.000309906	0.000287859	0.000288705	0.000328524	0.000317317	0.00027963	0.00029389
		YFL049W	889	822	911	630	614	748	595	592	615	818	781	715	642	705	701	628	918	922	1048	1205	926	1039	451	429	262	249	163	118	551	667							YFL049W	0.000314575	0.00030717	0.000316286	0.000276154	0.0003011	0.000299933	0.000260629	0.000244918	0.000240857	0.000286192
		YFL050C	0	0	0	0	0	0	0	0	0	0	0	0	0	0	0	0	0	0	0	0	0	0	0	0	0	0	0	0	0	0							YFL050C	0	0	0	0	0	0	0	0	0	0
		YFL051C	909	769	973	758	635	829	732	724	783	943	864	865	752	871	742	701	917	982	912	906	783	980	612	636	344	331	209	175	596	775							YFL051C	0.000321652	0.000287364	0.000337811	0.000332261	0.000311398	0.000332412	0.000320639	0.000299528	0.000306653	0.000329926
		YFL052W	892	839	1034	779	652	836	730	745	765	875	889	787	750	786	735	667	937	920	748	880	723	948	555	581	345	373	220	194	579	691							YFL052W	0.000315637	0.000313522	0.00035899	0.000341466	0.000319735	0.000335219	0.000319763	0.000308216	0.000299603	0.000306135
		YFL053W	844	744	855	649	547	719	643	655	682	817	721	689	562	676	665	591	851	754	681	702	641	847	439	430	267	296	148	137	571	630							YFL053W	0.000298652	0.000278022	0.000296843	0.000284482	0.000268244	0.000288305	0.000281654	0.000270982	0.000267097	0.000285843
		YFL054C	855	767	885	632	535	709	561	658	693	765	861	720	683	640	653	549	790	761	648	649	563	743	476	433	282	274	144	145	666	783							YFL054C	0.000302544	0.000286617	0.000307259	0.00027703	0.000262359	0.000284295	0.000245736	0.000272223	0.000271405	0.000267649
		YFL055W	779	762	890	634	515	703	640	592	693	796	723	701	730	698	637	632	820	728	647	717	599	808	526	370	300	274	162	189	543	674							YFL055W	0.000275651	0.000284749	0.000308995	0.000277907	0.000252551	0.000281889	0.00028034	0.000244918	0.000271405	0.000278495
		YFL056C	831	798	914	665	569	774	697	696	643	844	750	717	711	718	709	636	843	852	820	765	705	991	613	557	389	294	160	192	609	687							YFL056C	0.000294052	0.000298201	0.000317327	0.000291496	0.000279032	0.000310358	0.000305308	0.000287944	0.000251823	0.000295289
		YFL063W	835	731	925	607	588	694	656	680	722	740	812	729	635	660	683	579	789	746	611	670	547	757	434	469	271	232	139	158	610	720							YFL063W	0.000295467	0.000273164	0.000321146	0.000266072	0.00028835	0.00027828	0.000287349	0.000281324	0.000282763	0.000258903
		YFR001W	370	356	332	182	131	147	108	118	88	99	74	68	52	48	112	141	166	153	245	244	258	319	381	291	401	412	357	330	588	702							YFR001W	0.000130926	0.000133032	0.000115266	7.97777e-05	6.42412e-05	5.8944e-05	4.73074e-05	4.8818e-05	3.44641e-05	3.4637e-05
		YFR006W	1062	971	1038	797	717	969	820	915	838	1006	997	896	860	1031	857	749	1100	1067	880	918	934	1182	842	764	824	906	805	826	667	832							YFR006W	0.000375792	0.000362849	0.000360378	0.000349356	0.00035161	0.000388549	0.000359186	0.000378547	0.000328193	0.000351968
		YFR007W	0	0	0	0	0	0	0	0	0	0	0	0	0	0	0	0	0	0	0	0	0	0	0	0	0	0	0	0	0	0							YFR007W	0	0	0	0	0	0	0	0	0	0
		YFR008W	0	0	0	0	0	0	0	0	0	0	0	0	0	0	0	0	0	0	0	0	0	0	0	0	0	0	0	0	0	0							YFR008W	0	0	0	0	0	0	0	0	0	0
		YFR009W	1767	1589	1700	1163	961	1250	1058	1184	1123	1284	1219	1225	1119	1226	1324	1131	1581	1632	1397	1403	1463	1950	1483	1311	915	656	454	376	1035	1239							YFR009W	0.000625258	0.000593787	0.000590215	0.000509789	0.000471265	0.000501225	0.000463438	0.000489835	0.00043981	0.000449231
		YFR010W	0	0	0	0	0	0	0	0	0	0	0	0	0	0	0	0	0	0	0	0	0	0	0	0	0	0	0	0	0	0							YFR010W	0	0	0	0	0	0	0	0	0	0
		YFR011C	1016	1092	1105	856	833	1035	882	899	1004	1079	1082	1015	983	1073	947	833	1116	996	825	876	785	966	740	719	465	413	241	241	686	822							YFR011C	0.000359515	0.000408065	0.00038364	0.000375218	0.000408495	0.000415014	0.000386344	0.000371927	0.000393205	0.000377508
		YFR012W	0	0	0	0	0	0	0	0	0	0	0	0	0	0	0	0	0	0	0	0	0	0	0	0	0	0	0	0	0	0							YFR012W	0	0	0	0	0	0	0	0	0	0
		YFR012W-A	0	0	0	0	0	0	0	0	0	0	0	0	0	0	0	0	0	0	0	0	0	0	0	0	0	0	0	0	0	0							YFR012W-A	0	0	0	0	0	0	0	0	0	0
		YFR013W	951	866	945	689	631	767	739	746	763	955	919	839	778	845	723	594	795	864	677	786	770	979	797	680	579	496	310	274	557	613							YFR013W	0.000336514	0.000323612	0.00032809	0.000302016	0.000309436	0.000307552	0.000323706	0.000308629	0.00029882	0.000334124
		YFR014C	846	751	907	619	616	728	692	690	661	821	838	714	655	698	709	596	769	825	672	717	685	805	615	440	294	321	186	173	586	693							YFR014C	0.00029936	0.000280638	0.000314897	0.000271332	0.000302081	0.000291913	0.000303118	0.000285461	0.000258873	0.000287242
		YFR015C	0	1	0	0	2	0	0	0	0	0	2	0	3	1	0	1	0	0	0	0	2	0	0	0	0	0	0	0	1	0							YFR015C	0	3.73686e-07	0	0	9.80781e-07	0	0	0	0	0
		YFR016C	885	724	890	626	540	684	702	717	756	906	853	746	677	793	689	652	776	833	762	769	676	892	560	500	310	295	185	171	480	628							YFR016C	0.00031316	0.000270549	0.000308995	0.0002744	0.000264811	0.00027427	0.000307498	0.000296632	0.000296078	0.000316981
		YFR017C	444	359	399	282	259	313	301	298	333	373	335	329	292	285	286	240	210	223	89	113	61	111	64	52	26	31	20	16	586	692							YFR017C	0.000157111	0.000134153	0.000138527	0.000123612	0.000127011	0.000125507	0.000131848	0.000123286	0.000130415	0.000130501
		YFR018C	0	0	0	0	0	0	0	0	0	0	0	0	0	0	0	0	0	0	0	0	0	0	0	0	0	0	0	0	0	0							YFR018C	0	0	0	0	0	0	0	0	0	0
		YFR019W	5	3	4	0	2	3	2	4	2	0	1	1	0	0	0	2	0	1	0	0	0	0	0	0	3	0	0	1	41	51							YFR019W	1.76926e-06	1.12106e-06	1.38874e-06	0	9.80781e-07	1.20294e-06	8.76064e-07	1.65485e-06	7.83276e-07	0
		YFR020W	921	942	1013	692	629	803	705	724	769	882	837	834	721	770	760	731	983	910	798	887	824	1130	818	722	522	396	296	311	570	688							YFR020W	0.000325899	0.000352012	0.000351699	0.000303331	0.000308456	0.000321987	0.000308812	0.000299528	0.00030117	0.000308584
		YFR021W	1096	1028	1063	795	644	874	860	816	842	1015	897	937	782	964	869	792	1142	1173	1039	1133	1271	1650	1643	1405	1528	1416	1069	1134	530	557							YFR021W	0.000387823	0.000384149	0.000369058	0.00034848	0.000315812	0.000350456	0.000376707	0.000337589	0.000329759	0.000355116
		YFR022W	980	893	977	759	614	830	756	788	819	859	897	863	745	811	801	683	873	1013	818	783	776	971	663	654	501	423	229	196	510	606							YFR022W	0.000346776	0.000333701	0.0003392	0.000332699	0.0003011	0.000332813	0.000331152	0.000326005	0.000320752	0.000300537
		YFR023W	0	0	0	0	0	0	0	0	0	0	0	0	0	0	0	0	0	0	0	0	0	0	0	0	0	0	0	0	0	0							YFR023W	0	0	0	0	0	0	0	0	0	0
		YFR024C	1010	952	984	780	693	876	789	799	774	1048	931	902	800	868	680	721	927	933	731	784	571	715	365	279	165	168	83	95	574	636							YFR024C	0.000357391	0.000355749	0.00034163	0.000341905	0.000339841	0.000351258	0.000345607	0.000330556	0.000303128	0.000366662
		YFR024C-A	0	0	0	0	0	0	0	0	0	0	0	0	0	0	0	0	0	0	1	0	0	0	0	0	0	0	0	0	0	0							YFR024C-A	0	0	0	0	0	0	0	0	0	0
		YFR025C	0	0	0	0	0	0	0	0	0	0	0	0	0	0	0	0	0	0	0	0	0	0	0	0	0	0	0	0	0	0							YFR025C	0	0	0	0	0	0	0	0	0	0
		YFR026C	1012	863	1040	705	669	844	734	734	789	892	896	832	789	836	738	674	856	956	725	787	772	890	607	516	377	288	230	230	581	701							YFR026C	0.000358099	0.000322491	0.000361073	0.000309029	0.000328071	0.000338427	0.000321515	0.000303665	0.000309002	0.000312083
		YFR030W	979	938	992	816	714	847	823	852	905	1007	1073	937	819	928	778	712	997	984	887	870	815	1025	695	663	479	418	240	302	650	722							YFR030W	0.000346422	0.000350517	0.000344408	0.000357685	0.000350139	0.00033963	0.0003605	0.000352483	0.000354432	0.000352318
		YFR031C-A	615	596	589	357	307	443	319	259	324	295	290	239	221	256	314	284	421	385	585	589	602	704	725	628	386	372	170	148	623	729							YFR031C-A	0.00021762	0.000222717	0.000204492	0.000156487	0.00015055	0.000177634	0.000139732	0.000107151	0.000126891	0.000103211
		YFR032C	913	904	1007	737	641	756	706	805	751	915	861	847	767	778	746	726	887	895	775	844	758	934	631	596	368	326	239	231	677	755							YFR032C	0.000323068	0.000337812	0.000349616	0.000323056	0.00031434	0.000303141	0.00030925	0.000333038	0.00029412	0.00032013
		YFR032C-A	719	703	596	519	370	452	391	334	343	365	298	315	259	254	351	346	615	574	683	670	525	664	316	269	166	117	49	53	548	689							YFR032C-A	0.00025442	0.000262701	0.000206922	0.000227498	0.000181445	0.000181243	0.00017127	0.00013818	0.000134332	0.000127702
		YFR032C-B	0	0	0	0	0	0	0	0	0	0	0	0	0	0	0	0	0	0	0	0	0	0	0	0	0	0	0	0	0	0							YFR032C-B	0	0	0	0	0	0	0	0	0	0
		YFR033C	628	626	675	451	440	529	514	458	450	628	576	550	477	526	440	410	251	245	76	66	46	43	40	35	38	47	42	41	546	623							YFR033C	0.00022222	0.000233927	0.00023435	0.000197691	0.000215772	0.000212118	0.000225148	0.00018948	0.000176237	0.000219717
		YFR034C	0	0	0	0	1	0	0	1	0	0	0	0	0	0	0	0	0	0	0	0	0	0	0	0	0	0	0	0	0	0							YFR034C	0	0	0	0	4.90391e-07	0	0	4.13712e-07	0	0
		YFR035C	840	846	780	676	596	696	655	690	779	814	828	759	717	693	708	574	848	838	752	765	770	963	725	568	411	408	253	291	597	708							YFR035C	0.000297236	0.000316138	0.000270805	0.000296317	0.000292273	0.000279082	0.000286911	0.000285461	0.000305086	0.000284793
		YFR036W	82	121	161	127	101	160	139	132	103	148	149	137	131	138	119	104	83	147	119	111	58	47	43	8	40	26	28	28	47	41							YFR036W	2.90159e-05	4.5216e-05	5.58968e-05	5.56691e-05	4.95294e-05	6.41568e-05	6.08864e-05	5.461e-05	4.03387e-05	5.17805e-05
		YFR038W	0	0	0	0	0	0	0	0	0	0	0	0	0	0	0	0	0	0	0	0	0	0	0	0	0	0	0	0	0	0							YFR038W	0	0	0	0	0	0	0	0	0	0
		YFR039C	857	868	934	716	635	736	697	742	759	897	804	808	809	773	724	720	816	845	661	693	518	758	456	441	283	270	98	148	571	685							YFR039C	0.000303252	0.000324359	0.000324271	0.000313851	0.000311398	0.000295121	0.000305308	0.000306974	0.000297253	0.000313832
		YFR040W	973	983	881	599	495	664	602	550	617	628	640	648	538	641	748	645	667	735	801	828	911	1106	682	626	229	197	70	57	738	882							YFR040W	0.000344299	0.000367333	0.00030587	0.000262565	0.000242743	0.000266251	0.000263695	0.000227542	0.000241641	0.000219717
		YFR041C	0	0	0	0	0	0	0	0	0	0	0	0	0	0	0	0	0	0	0	0	0	0	0	0	0	0	0	0	0	0							YFR041C	0	0	0	0	0	0	0	0	0	0
		YFR043C	0	0	0	0	0	0	0	0	0	0	0	0	0	0	0	0	0	0	0	0	0	0	0	0	0	0	0	0	0	0							YFR043C	0	0	0	0	0	0	0	0	0	0
		YFR044C	962	885	983	761	656	797	717	797	758	964	878	830	765	745	716	749	1074	1094	1076	1178	1117	1237	771	758	534	384	264	259	619	643							YFR044C	0.000340406	0.000330712	0.000341283	0.000333576	0.000321696	0.000319581	0.000314069	0.000329729	0.000296862	0.000337273
		YFR045W	0	0	0	0	0	0	0	0	0	0	0	0	0	0	0	0	0	0	0	0	0	0	0	0	0	0	0	0	0	0							YFR045W	0	0	0	0	0	0	0	0	0	0
		YFR046C	0	0	0	0	0	0	0	0	0	0	0	0	0	0	0	0	0	0	0	0	0	0	0	0	0	0	0	0	0	0							YFR046C	0	0	0	0	0	0	0	0	0	0
		YFR047C	695	715	812	589	482	581	518	581	581	705	665	675	572	660	585	519	783	749	689	780	762	947	639	579	458	396	260	246	596	788							YFR047C	0.000245928	0.000267185	0.000281914	0.000258182	0.000236368	0.000232969	0.0002269	0.000240367	0.000227542	0.000246657
		YFR048W	75	116	121	96	69	104	117	78	60	105	84	73	76	96	76	75	51	87	80	85	53	47	57	7	45	71	48	47	49	52							YFR048W	2.6539e-05	4.33476e-05	4.20094e-05	4.20806e-05	3.38369e-05	4.17019e-05	5.12497e-05	3.22696e-05	2.34983e-05	3.67362e-05
		YFR049W	36	54	59	51	35	48	33	46	48	45	62	48	58	54	51	42	53	35	50	58	35	45	28	22	31	28	17	19	37	64							YFR049W	1.27387e-05	2.0179e-05	2.04839e-05	2.23553e-05	1.71637e-05	1.9247e-05	1.44551e-05	1.90308e-05	1.87986e-05	1.57441e-05
		YFR053C	888	782	983	651	575	783	680	689	714	760	769	720	648	649	684	608	888	888	729	888	740	917	544	524	398	300	237	187	643	707							YFR053C	0.000314221	0.000292222	0.000341283	0.000285359	0.000281975	0.000313967	0.000297862	0.000285048	0.00027963	0.0002659
		YFR054C	749	700	808	600	503	618	577	595	585	739	702	670	665	679	605	589	687	829	721	714	688	816	501	498	324	321	163	205	598	690							YFR054C	0.000265036	0.00026158	0.000280526	0.000263004	0.000246666	0.000247806	0.000252744	0.000246159	0.000229108	0.000258553
		YFR055W	818	723	906	632	541	676	636	654	673	795	787	661	655	668	634	669	838	787	672	708	706	922	477	429	328	308	176	136	648	757							YFR055W	0.000289452	0.000270175	0.00031455	0.00027703	0.000265301	0.000271062	0.000278588	0.000270568	0.000263572	0.000278145
		YFR056C	790	778	879	608	549	690	617	719	741	795	726	726	712	599	666	566	749	834	674	729	659	799	473	507	281	242	162	160	652	716							YFR056C	0.000279544	0.000290728	0.000305176	0.00026651	0.000269224	0.000276676	0.000270266	0.000297459	0.000290204	0.000278145
		YFR057W	660	784	907	628	570	742	671	655	581	712	749	660	705	728	617	559	732	794	603	663	519	581	297	203	226	208	137	152	471	606							YFR057W	0.000233543	0.00029297	0.000314897	0.000275277	0.000279523	0.000297527	0.000293919	0.000270982	0.000227542	0.000249106
		YGL002W	886	812	914	680	702	857	776	823	933	1036	861	859	759	815	721	637	754	784	689	696	566	631	420	244	300	220	165	139	501	646							YGL002W	0.000313514	0.000303433	0.000317327	0.000298071	0.000344254	0.00034364	0.000339913	0.000340485	0.000365398	0.000362464
		YGL003C	0	0	0	0	0	0	0	0	0	0	0	0	0	0	0	0	0	0	0	0	0	0	0	0	0	0	0	0	0	0							YGL003C	0	0	0	0	0	0	0	0	0	0
		YGL004C	985	947	1049	848	719	873	823	869	983	979	957	998	845	1003	780	808	1006	997	853	889	772	961	546	499	325	308	180	259	675	820							YGL004C	0.000348545	0.00035388	0.000364197	0.000371712	0.000352591	0.000350055	0.0003605	0.000359516	0.00038498	0.000342521
		YGL005C	0	0	0	0	0	0	0	0	0	0	0	0	0	0	0	0	0	0	0	0	0	0	0	0	0	0	0	0	0	0							YGL005C	0	0	0	0	0	0	0	0	0	0
		YGL006W	0	0	0	0	2	0	0	0	0	0	0	0	0	0	0	0	0	0	0	0	0	0	0	0	0	0	0	0	0	0							YGL006W	0	0	0	0	9.80781e-07	0	0	0	0	0
		YGL006W-A	0	0	0	0	0	0	0	0	0	0	0	0	0	0	0	0	0	0	0	0	0	0	0	0	0	0	0	0	0	0							YGL006W-A	0	0	0	0	0	0	0	0	0	0
		YGL007C-A	0	0	0	0	0	0	0	0	0	0	0	0	0	0	0	0	0	0	0	0	0	0	0	0	0	0	0	0	0	0							YGL007C-A	0	0	0	0	0	0	0	0	0	0
		YGL007W	131	170	126	111	67	111	79	113	70	95	64	90	80	101	49	60	23	22	28	40	30	17	8	4	23	9	6	11	682	836							YGL007W	4.63547e-05	6.35266e-05	4.37454e-05	4.86557e-05	3.28562e-05	4.45088e-05	3.46045e-05	4.67495e-05	2.74147e-05	3.32375e-05
		YGL009C	0	0	0	0	0	0	0	0	0	0	0	0	0	0	0	0	0	0	0	0	0	0	0	0	0	0	0	0	0	0							YGL009C	0	0	0	0	0	0	0	0	0	0
		YGL010W	1006	939	1051	825	737	947	857	833	963	1077	885	949	859	870	773	722	987	1049	913	892	745	967	560	537	359	308	190	212	632	851							YGL010W	0.000355976	0.000350891	0.000364892	0.00036163	0.000361418	0.000379728	0.000375393	0.000344622	0.000377147	0.000376808
		YGL012W	0	0	0	0	0	0	0	0	0	0	0	0	0	0	0	0	0	0	0	0	0	0	0	0	0	0	0	0	0	0							YGL012W	0	0	0	0	0	0	0	0	0	0
		YGL013C	3	2	3	2	0	0	1	0	1	3	0	1	0	2	2	1	0	1	3	4	1	3	0	2	1	0	0	2	0	0							YGL013C	1.06156e-06	7.47372e-07	1.04156e-06	8.76679e-07	0	0	4.38032e-07	0	3.91638e-07	1.04961e-06
		YGL014W	3	1	1	1	1	1	1	1	1	0	0	1	3	0	3	1	0	1	0	1	2	2	2	3	0	0	1	0	3	5							YGL014W	1.06156e-06	3.73686e-07	3.47185e-07	4.38339e-07	4.90391e-07	4.0098e-07	4.38032e-07	4.13712e-07	3.91638e-07	0
		YGL015C	878	708	812	655	586	730	647	685	760	831	733	772	619	681	604	616	713	725	680	708	596	779	539	381	296	248	160	167	495	634							YGL015C	0.000310683	0.00026457	0.000281914	0.000287112	0.000287369	0.000292715	0.000283407	0.000283393	0.000297645	0.000290741
		YGL016W	0	0	0	0	0	0	0	0	0	0	0	0	0	0	0	0	0	0	0	0	0	0	0	0	0	0	0	0	0	0							YGL016W	0	0	0	0	0	0	0	0	0	0
		YGL017W	0	0	0	0	0	0	0	0	0	0	0	0	0	0	0	0	0	0	0	0	0	0	0	0	0	0	0	0	0	0							YGL017W	0	0	0	0	0	0	0	0	0	0
		YGL019W	0	0	0	0	0	0	0	0	0	0	0	0	0	0	0	0	0	0	0	0	0	0	0	0	0	0	0	0	0	0							YGL019W	0	0	0	0	0	0	0	0	0	0
		YGL020C	119	120	113	123	93	116	84	115	110	139	94	117	69	102	91	88	43	45	32	39	35	38	30	13	13	22	17	18	260	299							YGL020C	4.21085e-05	4.48423e-05	3.92319e-05	5.39157e-05	4.56063e-05	4.65137e-05	3.67947e-05	4.75769e-05	4.30802e-05	4.86317e-05
		YGL021W	1005	908	949	757	683	818	729	849	1056	1060	869	921	892	889	851	752	892	990	754	841	706	860	506	427	304	275	189	185	655	840							YGL021W	0.000355622	0.000339307	0.000329479	0.000331823	0.000334937	0.000328002	0.000319325	0.000351242	0.00041357	0.000370861
		YGL023C	0	0	0	0	0	0	0	0	0	0	0	0	0	0	0	0	0	0	0	0	0	0	0	0	0	0	0	0	0	0							YGL023C	0	0	0	0	0	0	0	0	0	0
		YGL024W	0	0	0	0	0	0	0	0	0	0	0	0	0	0	0	0	0	0	0	0	0	0	0	0	0	0	0	0	0	0							YGL024W	0	0	0	0	0	0	0	0	0	0
		YGL025C	0	0	0	0	0	0	0	0	0	0	0	0	0	0	0	0	0	0	0	0	0	0	0	0	0	0	0	0	0	0							YGL025C	0	0	0	0	0	0	0	0	0	0
		YGL026C	777	743	889	631	558	629	572	649	683	658	625	598	421	477	641	579	705	687	656	712	600	746	520	454	389	310	145	194	734	828							YGL026C	0.000274944	0.000277649	0.000308648	0.000276592	0.000273638	0.000252216	0.000250554	0.000268499	0.000267489	0.000230213
		YGL027C	947	893	799	690	676	803	749	736	813	812	839	864	684	863	737	620	731	829	522	594	566	714	630	602	522	492	317	370	653	821							YGL027C	0.000335099	0.000333701	0.000277401	0.000302454	0.000331504	0.000321987	0.000328086	0.000304492	0.000318402	0.000284093
		YGL028C	1050	1093	1005	889	762	1007	872	879	1009	1162	1105	1068	1029	1168	906	801	1159	1183	1088	1065	1100	1484	1126	1035	1063	885	669	666	598	779							YGL028C	0.000371546	0.000408439	0.000348921	0.000389684	0.000373678	0.000403787	0.000381964	0.000363653	0.000395163	0.000406547
		YGL029W	927	985	1012	769	556	827	618	616	633	690	610	550	453	568	608	612	915	942	1391	1234	1348	1601	1492	1286	867	824	378	463	672	895							YGL029W	0.000328022	0.000368081	0.000351352	0.000337083	0.000272657	0.00033161	0.000270704	0.000254847	0.000247907	0.000241409
		YGL031C	861	694	668	541	417	497	435	375	384	442	366	334	273	307	436	451	533	561	690	609	613	732	613	358	378	280	112	113	750	891							YGL031C	0.000304667	0.000259338	0.00023192	0.000237142	0.000204493	0.000199287	0.000190544	0.000155142	0.000150389	0.000154642
		YGL032C	0	0	0	0	0	0	0	0	0	0	0	0	0	0	0	0	0	0	0	0	0	0	0	0	0	0	0	0	0	0							YGL032C	0	0	0	0	0	0	0	0	0	0
		YGL033W	0	0	0	0	0	0	0	0	0	0	0	0	0	0	0	0	0	0	0	0	0	0	0	0	0	0	0	0	0	0							YGL033W	0	0	0	0	0	0	0	0	0	0
		YGL034C	991	1031	1094	871	820	981	882	936	1030	1114	1073	965	966	1032	932	825	835	792	627	723	736	831	537	331	299	317	204	174	525	558							YGL034C	0.000350668	0.00038527	0.000379821	0.000381793	0.00040212	0.000393361	0.000386344	0.000387235	0.000403387	0.000389753
		YGL035C	1016	1014	1040	820	787	885	817	866	1007	1048	1002	988	838	975	826	702	713	800	662	778	1216	1684	2059	1756	2679	2146	2223	2021	472	604							YGL035C	0.000359515	0.000378917	0.000361073	0.000359438	0.000385937	0.000354867	0.000357872	0.000358275	0.00039438	0.000366662
		YGL036W	3	6	0	2	2	4	2	2	3	1	0	6	3	0	1	2	1	0	2	0	4	0	0	0	0	0	0	0	8	7							YGL036W	1.06156e-06	2.24211e-06	0	8.76679e-07	9.80781e-07	1.60392e-06	8.76064e-07	8.27424e-07	1.17491e-06	3.49868e-07
		YGL037C	1365	1376	1293	1121	1006	1207	1184	1241	1454	1465	1446	1424	1150	1353	1119	1054	1321	1342	1244	1303	984	1215	677	529	352	355	200	208	700	948							YGL037C	0.000483009	0.000514192	0.000448911	0.000491378	0.000493333	0.000483983	0.00051863	0.000513417	0.000569442	0.000512557
		YGL038C	0	0	0	0	0	0	0	0	0	0	0	0	0	0	0	0	0	0	0	0	0	0	0	0	0	0	0	0	0	0							YGL038C	0	0	0	0	0	0	0	0	0	0
		YGL039W	1064	997	1060	957	853	1019	981	954	1122	1167	1079	1087	970	1102	872	893	1044	1085	970	1112	911	1167	808	740	481	374	286	303	560	772							YGL039W	0.000376499	0.000372565	0.000368016	0.000419491	0.000418303	0.000408598	0.000429709	0.000394681	0.000439418	0.000408297
		YGL041C	0	0	0	0	0	0	0	0	0	0	0	0	0	0	0	0	1	0	0	0	0	0	0	0	0	0	0	0	0	1							YGL041C	0	0	0	0	0	0	0	0	0	0
		YGL041C-B	0	0	0	0	0	0	0	0	0	0	0	0	0	0	0	0	0	0	0	0	0	0	0	0	0	0	0	0	0	0							YGL041C-B	0	0	0	0	0	0	0	0	0	0
		YGL042C	760	687	793	602	588	665	566	661	697	688	671	669	508	629	526	502	334	337	252	280	328	418	287	254	217	207	123	138	640	827							YGL042C	0.000268928	0.000256722	0.000275318	0.00026388	0.00028835	0.000266652	0.000247926	0.000273464	0.000272972	0.00024071
		YGL043W	628	589	595	515	463	528	473	524	551	596	538	548	429	520	382	397	293	284	225	255	312	427	449	413	362	302	189	206	595	711							YGL043W	0.00022222	0.000220101	0.000206575	0.000225745	0.000227051	0.000211717	0.000207189	0.000216785	0.000215793	0.000208522
		YGL045W	0	0	0	0	0	0	0	0	0	0	0	0	0	0	0	0	0	0	0	0	0	0	0	0	0	0	0	0	0	0							YGL045W	0	0	0	0	0	0	0	0	0	0
		YGL046W	702	605	644	479	433	507	392	448	464	506	402	445	362	357	420	399	500	517	666	582	337	384	121	112	43	48	59	48	654	919							YGL046W	0.000248405	0.00022608	0.000223587	0.000209965	0.000212339	0.000203297	0.000171708	0.000185343	0.00018172	0.000177033
		YGL049C	0	0	0	0	0	0	0	0	0	0	0	0	0	0	0	0	0	0	0	0	0	0	0	0	0	0	0	0	0	0							YGL049C	0	0	0	0	0	0	0	0	0	0
		YGL050W	1031	1059	1105	905	805	1058	947	1047	1156	1217	1102	1126	1041	1088	919	889	1047	1134	1033	1056	1088	1157	739	653	415	401	233	302	642	785							YGL050W	0.000364822	0.000395733	0.00038364	0.000396697	0.000394764	0.000424237	0.000414816	0.000433157	0.000452734	0.00042579
		YGL051W	996	954	896	795	666	816	795	791	908	1032	1025	938	790	937	781	691	930	903	919	935	792	923	611	515	294	307	145	221	697	861							YGL051W	0.000352437	0.000356496	0.000311078	0.00034848	0.0003266	0.0003272	0.000348235	0.000327246	0.000355607	0.000361064
		YGL053W	1210	1061	1049	864	871	983	894	920	1105	1187	1096	1068	923	1006	934	823	980	978	901	1020	881	1058	657	598	419	398	273	287	728	866							YGL053W	0.000428162	0.000396481	0.000364197	0.000378725	0.00042713	0.000394163	0.0003916	0.000380615	0.00043276	0.000415294
		YGL054C	0	0	0	0	0	0	0	0	0	0	0	1	0	0	0	0	0	0	0	0	0	0	0	0	0	0	0	0	0	0							YGL054C	0	0	0	0	0	0	0	0	0	0
		YGL056C	1100	1099	1148	867	874	1089	912	1030	1111	1235	1063	1066	852	1068	958	936	1119	1109	1022	1142	853	1028	766	741	856	776	650	659	655	903							YGL056C	0.000389238	0.000410681	0.000398569	0.00038004	0.000428601	0.000436667	0.000399485	0.000426124	0.00043511	0.000432088
		YGL057C	0	0	0	0	0	0	0	0	0	0	0	0	0	0	0	0	0	0	0	0	0	0	0	0	0	0	0	0	0	0							YGL057C	0	0	0	0	0	0	0	0	0	0
		YGL058W	234	214	208	149	126	165	100	111	113	150	76	95	66	93	94	111	49	80	67	49	50	41	10	11	14	5	1	5	492	639							YGL058W	8.28016e-05	7.99688e-05	7.22145e-05	6.53125e-05	6.17892e-05	6.61617e-05	4.38032e-05	4.59221e-05	4.42551e-05	5.24803e-05
		YGL059W	1047	873	944	770	795	838	732	848	962	1102	915	971	788	897	722	720	910	887	785	904	862	1039	720	545	475	396	219	254	617	706							YGL059W	0.000370484	0.000326228	0.000327743	0.000337521	0.00038986	0.000336021	0.000320639	0.000350828	0.000376756	0.000385555
		YGL060W	239	336	391	338	352	365	325	356	316	464	398	456	348	352	286	289	333	444	422	402	318	368	426	134	480	468	364	389	187	194							YGL060W	8.45708e-05	0.000125558	0.000135749	0.000148159	0.000172617	0.000146358	0.00014236	0.000147282	0.000123758	0.000162339
		YGL062W	680	668	596	615	528	616	569	611	633	686	648	666	469	633	549	531	534	558	469	495	402	558	316	255	215	202	128	118	571	666							YGL062W	0.00024062	0.000249622	0.000206922	0.000269579	0.000258926	0.000247004	0.00024924	0.000252778	0.000247907	0.00024001
		YGL063W	934	909	982	792	690	861	825	849	996	987	983	919	831	937	759	736	907	929	770	914	718	876	556	564	327	314	168	211	577	708							YGL063W	0.000330499	0.00033968	0.000340936	0.000347165	0.000338369	0.000345244	0.000361376	0.000351242	0.000390072	0.00034532
		YGL064C	297	277	268	264	228	245	261	231	259	271	223	223	200	182	204	143	39	34	26	19	12	30	25	16	14	20	12	8	506	727							YGL064C	0.000105094	0.000103511	9.30457e-05	0.000115722	0.000111809	9.82401e-05	0.000114326	9.55675e-05	0.000101434	9.48144e-05
		YGL066W	0	0	0	0	0	0	0	0	0	0	0	0	0	0	0	0	0	0	0	0	0	0	0	0	0	0	0	0	0	0							YGL066W	0	0	0	0	0	0	0	0	0	0
		YGL067W	887	799	909	699	600	697	718	771	877	952	868	834	698	807	691	648	748	780	561	717	524	647	354	328	245	195	116	137	624	746							YGL067W	0.000313868	0.000298575	0.000315591	0.000306399	0.000294234	0.000279483	0.000314507	0.000318972	0.000343467	0.000333075
		YGL070C	0	0	0	0	0	0	0	0	0	0	0	0	0	0	0	0	0	0	0	0	0	0	0	0	0	0	0	0	0	0							YGL070C	0	0	0	0	0	0	0	0	0	0
		YGL071W	0	0	0	0	0	0	0	0	0	0	0	0	0	0	0	0	0	0	0	0	0	0	0	0	0	0	0	0	0	0							YGL071W	0	0	0	0	0	0	0	0	0	0
		YGL072C	13	28	26	28	17	21	28	29	21	24	15	25	15	18	15	20	11	23	19	16	5	2	4	1	0	1	1	1	34	35							YGL072C	4.60009e-06	1.04632e-05	9.02682e-06	1.22735e-05	8.33664e-06	8.42058e-06	1.22649e-05	1.19977e-05	8.2244e-06	8.39684e-06
		YGL076C	0	0	0	0	0	0	0	0	0	0	0	0	0	0	0	0	0	0	0	0	0	0	0	0	0	0	0	0	0	0							YGL076C	0	0	0	0	0	0	0	0	0	0
		YGL077C	6	3	7	1	0	5	2	5	4	3	4	2	2	1	3	4	2	1	3	3	1	1	1	1	2	0	0	0	12	21							YGL077C	2.12312e-06	1.12106e-06	2.4303e-06	4.38339e-07	0	2.0049e-06	8.76064e-07	2.06856e-06	1.56655e-06	1.04961e-06
		YGL078C	702	708	789	568	394	573	429	492	469	531	434	429	357	355	450	517	593	670	892	921	744	913	850	768	511	360	187	219	667	775							YGL078C	0.000248405	0.00026457	0.000273929	0.000248977	0.000193214	0.000229761	0.000187916	0.000203546	0.000183678	0.00018578
		YGL079W	975	912	1002	817	780	892	763	886	928	1106	946	906	893	921	836	723	1163	1111	1024	1079	1068	1331	888	842	611	613	304	377	635	727							YGL079W	0.000345007	0.000340801	0.00034788	0.000358123	0.000382505	0.000357674	0.000334218	0.000366549	0.00036344	0.000386955
		YGL080W	826	715	784	601	569	648	645	656	706	773	787	675	665	702	617	506	666	723	536	535	406	526	324	226	205	171	92	90	560	669							YGL080W	0.000292283	0.000267185	0.000272193	0.000263442	0.000279032	0.000259835	0.000282531	0.000271395	0.000276496	0.000270448
		YGL081W	0	0	0	0	0	0	0	0	0	0	0	0	0	0	0	0	0	0	0	0	0	0	0	0	0	0	0	0	0	0							YGL081W	0	0	0	0	0	0	0	0	0	0
		YGL082W	1235	1182	1286	955	920	1162	973	1015	1177	1360	1166	1206	1047	1089	1027	891	1118	1233	1080	1162	981	1280	873	813	630	516	280	289	695	884							YGL082W	0.000437008	0.000441697	0.00044648	0.000418614	0.000451159	0.000465939	0.000426205	0.000419918	0.000460958	0.000475821
		YGL083W	859	812	858	716	643	815	737	781	848	879	819	784	714	782	715	615	751	788	713	765	652	780	517	454	320	310	247	198	661	778							YGL083W	0.00030396	0.000303433	0.000297885	0.000313851	0.000315321	0.000326799	0.000322829	0.000323109	0.000332109	0.000307534
		YGL084C	84	87	70	40	34	33	24	22	13	24	20	15	18	23	32	21	15	6	3	5	10	1	2	2	4	0	4	5	554	684							YGL084C	2.97236e-05	3.25107e-05	2.4303e-05	1.75336e-05	1.66733e-05	1.32323e-05	1.05128e-05	9.10167e-06	5.09129e-06	8.39684e-06
		YGL085W	0	0	0	0	0	0	0	0	0	0	0	0	0	1	0	0	0	0	0	0	0	0	0	0	0	0	0	0	0	0							YGL085W	0	0	0	0	0	0	0	0	0	0
		YGL086W	0	0	0	0	0	0	0	0	0	0	0	0	0	0	0	0	0	0	0	0	0	0	0	0	0	0	0	0	0	0							YGL086W	0	0	0	0	0	0	0	0	0	0
		YGL087C	1185	1106	1191	934	854	982	937	1026	1047	1255	1130	1102	908	1023	934	859	2304	2211	2580	2750	2098	2471	1503	1418	1282	1089	793	761	558	651							YGL087C	0.000419316	0.000413296	0.000413498	0.000409409	0.000418794	0.000393762	0.000410436	0.000424469	0.000410045	0.000439085
		YGL088W	1325	1156	1011	707	514	672	462	434	360	439	300	306	228	271	612	551	695	740	1032	1123	1323	1552	2496	1564	1705	1372	397	281	1143	1324							YGL088W	0.000468855	0.000431981	0.000351004	0.000309906	0.000252061	0.000269458	0.000202371	0.000179551	0.00014099	0.000153592
		YGL089C	1	0	4	0	0	2	0	0	0	0	0	1	3	2	0	0	0	0	0	2	0	0	0	0	0	0	1	0	2	1							YGL089C	3.53853e-07	0	1.38874e-06	0	0	8.0196e-07	0	0	0	0
		YGL090W	974	824	959	789	692	850	840	799	955	1008	885	921	880	850	719	631	849	890	720	841	698	941	541	436	373	317	220	176	568	751							YGL090W	0.000344653	0.000307917	0.000332951	0.00034585	0.00033935	0.000340833	0.000367947	0.000330556	0.000374014	0.000352667
		YGL094C	906	875	906	808	687	813	723	737	904	890	897	855	747	870	689	684	913	953	1154	1200	1090	1147	756	606	554	476	340	300	650	919							YGL094C	0.000320591	0.000326975	0.00031455	0.000354178	0.000336898	0.000325997	0.000316697	0.000304906	0.000354041	0.000311383
		YGL095C	0	0	0	0	0	0	0	0	0	0	0	0	0	0	0	0	0	0	0	0	0	0	0	0	0	0	0	0	0	0							YGL095C	0	0	0	0	0	0	0	0	0	0
		YGL096W	972	906	1005	769	734	851	823	910	959	989	916	894	778	869	783	668	820	898	770	841	747	886	570	593	467	384	252	258	569	769							YGL096W	0.000343945	0.000338559	0.000348921	0.000337083	0.000359947	0.000341234	0.0003605	0.000376478	0.000375581	0.00034602
		YGL100W	0	0	0	0	0	0	0	0	0	0	0	0	0	0	0	0	0	0	0	0	0	0	0	0	0	0	0	0	0	0							YGL100W	0	0	0	0	0	0	0	0	0	0
		YGL101W	0	0	0	0	0	0	0	0	0	0	0	0	0	0	0	0	0	0	0	0	0	0	0	0	0	0	0	0	0	0							YGL101W	0	0	0	0	0	0	0	0	0	0
		YGL104C	0	0	0	0	0	0	0	0	0	0	0	0	0	0	0	0	0	0	0	0	0	0	0	0	0	0	0	0	0	0							YGL104C	0	0	0	0	0	0	0	0	0	0
		YGL105W	0	0	0	0	0	0	0	0	0	0	0	0	0	0	0	0	0	0	0	0	0	0	0	0	0	0	0	0	0	0							YGL105W	0	0	0	0	0	0	0	0	0	0
		YGL107C	236	213	223	180	184	207	170	178	154	193	174	126	93	119	163	110	26	29	13	11	13	14	4	8	7	7	6	4	394	484							YGL107C	8.35093e-05	7.95951e-05	7.74223e-05	7.89011e-05	9.02319e-05	8.30028e-05	7.44654e-05	7.36408e-05	6.03123e-05	6.75246e-05
		YGL108C	8	6	3	2	2	1	2	5	4	1	3	1	3	4	2	2	3	5	1	0	3	2	3	9	1	2	3	1	2	0							YGL108C	2.83082e-06	2.24211e-06	1.04156e-06	8.76679e-07	9.80781e-07	4.0098e-07	8.76064e-07	2.06856e-06	1.56655e-06	3.49868e-07
		YGL109W	5	3	3	4	4	4	1	5	12	2	4	8	3	3	4	3	3	1	3	2	2	4	3	2	1	0	0	0	2	5							YGL109W	1.76926e-06	1.12106e-06	1.04156e-06	1.75336e-06	1.96156e-06	1.60392e-06	4.38032e-07	2.06856e-06	4.69966e-06	6.99737e-07
		YGL110C	37	60	56	37	39	47	46	26	56	55	36	67	56	45	58	53	43	52	49	52	44	60	25	29	26	17	10	14	35	48							YGL110C	1.30926e-05	2.24211e-05	1.94424e-05	1.62186e-05	1.91252e-05	1.88461e-05	2.01495e-05	1.07565e-05	2.19317e-05	1.92428e-05
		YGL114W	1109	1036	1140	846	750	953	818	946	939	1064	994	913	805	963	850	751	988	1028	913	921	893	960	748	701	580	459	290	311	690	868							YGL114W	0.000392423	0.000387138	0.000395791	0.000370835	0.000367793	0.000382134	0.00035831	0.000391372	0.000367748	0.00037226
		YGL115W	47	43	46	41	32	60	39	59	68	66	63	79	54	80	8	7	7	7	9	7	8	5	9	5	12	10	12	2	566	679							YGL115W	1.66311e-05	1.60685e-05	1.59705e-05	1.79719e-05	1.56925e-05	2.40588e-05	1.70832e-05	2.4409e-05	2.66314e-05	2.30913e-05
		YGL117W	1097	1087	1266	918	838	1012	920	1026	1055	1210	1101	1173	950	1149	978	896	1035	1012	1011	998	845	1014	582	632	415	434	258	304	734	896							YGL117W	0.000388177	0.000406196	0.000439537	0.000402395	0.000410947	0.000405792	0.000402989	0.000424469	0.000413178	0.000423341
		YGL118C	0	0	0	0	0	0	0	0	0	0	0	0	0	0	0	0	0	0	0	0	0	0	0	0	0	0	0	0	0	0							YGL118C	0	0	0	0	0	0	0	0	0	0
		YGL119W	0	0	0	0	0	0	0	0	0	0	0	0	0	0	0	0	0	0	0	0	0	0	0	0	0	0	0	0	0	0							YGL119W	0	0	0	0	0	0	0	0	0	0
		YGL121C	1132	992	1002	803	768	931	875	931	1057	1089	1028	1072	886	986	834	791	976	954	914	973	859	1108	693	664	491	374	277	284	672	741							YGL121C	0.000400561	0.000370696	0.00034788	0.000351986	0.00037662	0.000373312	0.000383278	0.000385166	0.000413961	0.000381007
		YGL124C	271	294	250	214	184	230	223	234	244	227	227	242	184	192	183	169	271	256	322	333	265	351	200	198	173	184	145	134	433	552							YGL124C	9.58941e-05	0.000109864	8.67963e-05	9.38046e-05	9.02319e-05	9.22254e-05	9.76811e-05	9.68087e-05	9.55597e-05	7.94201e-05
		YGL125W	0	0	11	2	2	2	0	6	0	6	1	3	0	2	0	0	0	0	0	0	0	0	0	0	0	0	0	0	0	0							YGL125W	0	0	3.81904e-06	8.76679e-07	9.80781e-07	8.0196e-07	0	2.48227e-06	0	2.09921e-06
		YGL126W	847	830	799	752	603	857	689	729	768	871	805	812	778	851	662	617	838	827	782	826	764	918	547	570	410	376	330	261	544	753							YGL126W	0.000299713	0.000310159	0.000277401	0.000329631	0.000295706	0.00034364	0.000301804	0.000301596	0.000300778	0.000304735
		YGL127C	0	0	0	0	0	0	0	0	0	0	0	0	0	0	0	0	0	0	0	0	0	0	0	0	0	0	0	0	0	0							YGL127C	0	0	0	0	0	0	0	0	0	0
		YGL129C	0	0	0	0	0	0	0	0	0	0	0	0	0	0	0	0	0	0	0	0	0	0	0	0	0	0	0	0	0	0							YGL129C	0	0	0	0	0	0	0	0	0	0
		YGL131C	0	0	0	0	0	0	0	0	0	0	0	0	0	0	0	0	0	0	0	0	0	0	0	0	0	0	0	0	0	0							YGL131C	0	0	0	0	0	0	0	0	0	0
		YGL132W	0	0	0	0	0	0	0	0	0	0	0	0	0	0	0	0	0	0	0	0	0	0	0	0	0	0	0	0	0	0							YGL132W	0	0	0	0	0	0	0	0	0	0
		YGL133W	0	0	0	0	0	0	0	0	0	0	0	0	0	0	0	0	0	0	0	0	0	0	0	0	0	0	0	0	0	0							YGL133W	0	0	0	0	0	0	0	0	0	0
		YGL134W	0	0	0	0	0	0	0	0	0	0	0	0	0	0	0	0	0	0	0	0	0	0	0	0	0	0	0	0	0	0							YGL134W	0	0	0	0	0	0	0	0	0	0
		YGL135W	0	0	0	0	0	0	0	0	0	0	0	0	0	0	0	0	0	0	0	0	0	0	0	0	0	0	0	0	0	0							YGL135W	0	0	0	0	0	0	0	0	0	0
		YGL136C	0	0	0	0	0	0	0	0	0	0	0	0	0	0	0	0	0	0	0	0	0	0	0	0	0	0	0	0	0	0							YGL136C	0	0	0	0	0	0	0	0	0	0
		YGL138C	0	0	0	0	0	0	0	0	0	0	0	0	0	0	0	0	0	0	0	0	0	0	0	0	0	0	0	0	0	0							YGL138C	0	0	0	0	0	0	0	0	0	0
		YGL139W	1191	1023	1234	868	829	990	910	1044	1095	1195	1084	1008	995	999	928	747	1050	1081	940	878	827	1002	685	659	437	390	232	262	620	813							YGL139W	0.000421439	0.000382281	0.000428427	0.000380478	0.000406534	0.00039697	0.000398609	0.000431916	0.000428844	0.000418093
		YGL140C	0	0	0	0	0	0	0	0	0	0	0	0	0	0	0	0	0	0	0	0	0	0	0	0	0	0	0	0	0	0							YGL140C	0	0	0	0	0	0	0	0	0	0
		YGL141W	0	0	0	0	0	0	0	0	0	0	0	0	0	0	0	0	0	0	0	0	0	0	0	0	0	0	0	0	0	0							YGL141W	0	0	0	0	0	0	0	0	0	0
		YGL143C	0	0	0	0	0	0	0	0	0	0	0	0	0	0	0	0	0	0	0	0	0	0	0	0	0	0	0	0	0	0							YGL143C	0	0	0	0	0	0	0	0	0	0
		YGL144C	0	0	0	0	0	0	0	0	0	0	0	0	0	0	0	0	0	0	0	0	0	0	0	0	0	0	0	0	0	0							YGL144C	0	0	0	0	0	0	0	0	0	0
		YGL146C	0	0	0	0	0	0	0	0	0	0	0	0	0	0	0	0	0	0	0	0	0	0	0	0	0	0	0	0	0	0							YGL146C	0	0	0	0	0	0	0	0	0	0
		YGL147C	0	0	0	0	0	0	0	0	0	0	0	0	0	0	0	0	0	0	0	0	0	0	0	0	0	0	0	0	0	0							YGL147C	0	0	0	0	0	0	0	0	0	0
		YGL148W	0	0	0	0	0	0	0	0	0	0	0	0	0	0	0	0	0	0	0	0	0	0	0	0	0	0	0	0	0	0							YGL148W	0	0	0	0	0	0	0	0	0	0
		YGL149W	0	0	0	0	0	0	0	0	0	0	0	0	0	0	0	0	0	0	0	0	0	0	0	1	0	0	0	0	0	0							YGL149W	0	0	0	0	0	0	0	0	0	0
		YGL151W	0	0	0	0	0	0	0	0	0	0	0	0	0	0	0	0	0	0	0	0	0	0	0	0	0	0	0	0	0	0							YGL151W	0	0	0	0	0	0	0	0	0	0
		YGL152C	0	0	0	0	0	0	0	0	0	0	0	0	0	0	0	0	0	0	0	0	0	0	0	0	0	0	0	0	0	0							YGL152C	0	0	0	0	0	0	0	0	0	0
		YGL153W	0	0	0	0	0	0	0	0	0	0	0	0	0	0	0	0	0	0	0	0	0	0	0	0	0	0	0	0	0	0							YGL153W	0	0	0	0	0	0	0	0	0	0
		YGL154C	0	0	0	0	0	0	0	0	0	0	0	0	0	0	0	0	0	0	0	0	0	0	0	0	0	0	0	0	0	0							YGL154C	0	0	0	0	0	0	0	0	0	0
		YGL156W	0	0	0	0	0	0	0	0	0	0	0	0	0	0	0	0	0	0	0	0	0	0	0	0	0	0	0	0	0	0							YGL156W	0	0	0	0	0	0	0	0	0	0
		YGL157W	0	0	0	0	0	0	0	0	1	0	0	0	0	0	0	0	0	0	0	0	0	0	0	0	0	0	0	0	0	0							YGL157W	0	0	0	0	0	0	0	0	3.91638e-07	0
		YGL158W	0	0	0	0	0	0	0	0	0	0	0	0	0	0	0	0	0	0	0	0	0	0	0	0	0	0	0	0	0	0							YGL158W	0	0	0	0	0	0	0	0	0	0
		YGL159W	0	0	0	0	0	0	0	0	0	0	0	0	0	0	0	0	0	0	0	0	0	0	0	0	0	0	0	0	0	0							YGL159W	0	0	0	0	0	0	0	0	0	0
		YGL160W	0	0	0	0	0	0	0	0	0	0	0	0	0	0	0	0	0	0	0	0	0	1	0	0	0	0	0	0	0	0							YGL160W	0	0	0	0	0	0	0	0	0	0
		YGL161C	1	1	0	0	0	0	0	0	0	0	0	0	0	0	0	0	0	0	0	1	0	0	0	0	0	0	0	0	0	0							YGL161C	3.53853e-07	3.73686e-07	0	0	0	0	0	0	0	0
		YGL162W	0	0	0	0	0	0	0	0	0	0	0	0	0	0	0	0	0	0	0	0	0	0	0	0	0	0	1	0	0	0							YGL162W	0	0	0	0	0	0	0	0	0	0
		YGL163C	0	0	0	0	0	0	0	0	0	0	0	0	0	0	0	0	0	0	0	0	0	0	0	0	0	0	0	0	0	0							YGL163C	0	0	0	0	0	0	0	0	0	0
		YGL164C	0	0	0	0	0	0	0	0	0	0	0	0	0	0	0	0	0	0	0	0	0	0	0	1	0	0	0	0	0	0							YGL164C	0	0	0	0	0	0	0	0	0	0
		YGL165C	0	0	0	0	0	0	0	0	0	0	0	0	0	0	0	0	0	0	0	0	0	0	0	0	0	0	0	0	0	0							YGL165C	0	0	0	0	0	0	0	0	0	0
		YGL166W	0	1	0	0	0	0	0	0	0	0	0	0	0	0	0	0	0	0	0	0	0	0	0	0	0	0	0	0	0	0							YGL166W	0	3.73686e-07	0	0	0	0	0	0	0	0
		YGL167C	0	0	0	0	0	0	0	0	0	0	0	0	0	0	0	0	0	0	0	0	0	0	0	0	0	0	0	0	0	0							YGL167C	0	0	0	0	0	0	0	0	0	0
		YGL168W	0	0	0	0	0	0	0	0	0	0	0	0	0	0	0	0	0	0	0	0	0	0	0	0	0	0	0	0	0	0							YGL168W	0	0	0	0	0	0	0	0	0	0
		YGL170C	0	0	0	0	0	0	0	0	0	0	0	0	0	0	0	0	0	0	0	0	0	0	0	0	0	0	0	0	0	0							YGL170C	0	0	0	0	0	0	0	0	0	0
		YGL173C	0	0	0	0	0	0	0	0	0	0	0	0	0	0	0	0	0	0	0	0	0	0	0	0	0	0	0	0	0	0							YGL173C	0	0	0	0	0	0	0	0	0	0
		YGL174W	0	0	0	0	0	0	0	0	0	0	0	0	0	0	0	0	0	0	0	0	0	0	0	0	0	0	0	0	0	0							YGL174W	0	0	0	0	0	0	0	0	0	0
		YGL175C	0	0	0	0	0	0	0	0	0	0	0	0	0	0	0	0	0	0	0	0	0	0	0	0	0	0	0	0	0	0							YGL175C	0	0	0	0	0	0	0	0	0	0
		YGL176C	0	0	0	0	0	0	0	0	0	0	0	0	0	0	0	0	0	0	0	0	0	0	0	0	0	0	0	0	0	0							YGL176C	0	0	0	0	0	0	0	0	0	0
		YGL177W	0	0	0	0	0	0	0	0	0	0	0	0	0	0	0	0	0	0	0	0	0	0	0	0	0	0	0	0	0	0							YGL177W	0	0	0	0	0	0	0	0	0	0
		YGL178W	0	0	0	0	0	0	0	0	0	0	0	0	0	0	0	0	0	0	0	0	0	0	0	0	0	0	0	0	0	0							YGL178W	0	0	0	0	0	0	0	0	0	0
		YGL179C	0	0	0	0	0	0	0	0	0	0	0	0	0	0	0	0	0	0	0	0	0	0	0	0	0	0	0	0	0	0							YGL179C	0	0	0	0	0	0	0	0	0	0
		YGL180W	0	0	0	0	0	0	0	0	0	0	0	0	0	0	0	0	0	0	0	0	0	0	0	0	0	0	0	0	0	0							YGL180W	0	0	0	0	0	0	0	0	0	0
		YGL181W	0	0	0	0	0	0	0	0	0	0	0	0	0	0	0	0	0	0	0	0	0	0	0	0	0	0	0	0	0	0							YGL181W	0	0	0	0	0	0	0	0	0	0
		YGL184C	0	0	0	0	0	0	0	0	0	0	0	0	0	0	0	0	0	0	0	0	0	0	0	0	0	0	0	0	0	0							YGL184C	0	0	0	0	0	0	0	0	0	0
		YGL185C	0	0	0	0	0	0	0	0	1	0	0	0	0	0	0	0	0	0	0	0	0	0	0	0	0	0	0	0	0	0							YGL185C	0	0	0	0	0	0	0	0	3.91638e-07	0
		YGL186C	0	0	0	0	0	0	0	0	0	0	0	0	0	0	0	0	0	0	0	0	0	0	0	0	0	0	0	0	0	0							YGL186C	0	0	0	0	0	0	0	0	0	0
		YGL188C-A	0	0	0	0	0	0	0	0	0	0	0	0	0	0	0	0	0	0	0	0	0	0	0	0	0	0	0	0	0	0							YGL188C-A	0	0	0	0	0	0	0	0	0	0
		YGL190C	0	0	0	0	0	0	0	0	0	0	0	0	0	0	0	0	0	0	0	0	0	0	0	0	0	0	0	0	0	0							YGL190C	0	0	0	0	0	0	0	0	0	0
		YGL191W	0	0	0	0	0	0	0	0	0	0	0	0	0	0	0	0	0	0	0	0	0	0	0	0	0	0	0	0	0	0							YGL191W	0	0	0	0	0	0	0	0	0	0
		YGL192W	0	0	0	0	0	0	0	0	0	0	0	0	0	0	0	0	0	0	0	0	0	0	0	0	0	0	0	0	0	0							YGL192W	0	0	0	0	0	0	0	0	0	0
		YGL194C	842	767	818	624	556	709	740	701	725	816	684	775	581	657	606	600	1315	1300	2430	2521	4164	5015	9036	7974	15783	13626	14787	15356	446	591							YGL194C	0.000297944	0.000286617	0.000283998	0.000273524	0.000272657	0.000284295	0.000324144	0.000290012	0.000283938	0.000285493
		YGL195W	802	909	868	590	489	638	491	530	555	676	522	614	505	482	763	697	724	701	586	613	695	928	776	541	493	405	223	193	814	1035							YGL195W	0.00028379	0.00033968	0.000301357	0.00025862	0.000239801	0.000255825	0.000215074	0.000219267	0.000217359	0.000236511
		YGL196W	0	0	0	0	0	0	0	0	0	0	0	0	0	0	0	0	0	0	0	0	0	0	0	0	0	0	0	0	0	0							YGL196W	0	0	0	0	0	0	0	0	0	0
		YGL197W	423	403	343	310	230	305	263	323	369	343	321	334	349	325	256	275	353	406	354	382	355	463	289	259	216	178	103	101	512	559							YGL197W	0.00014968	0.000150595	0.000119085	0.000135885	0.00011279	0.000122299	0.000115202	0.000133629	0.000144514	0.000120005
		YGL198W	591	595	704	551	460	602	545	587	558	703	640	604	544	537	524	470	582	662	525	527	356	344	222	73	141	157	76	84	357	371							YGL198W	0.000209127	0.000222343	0.000244418	0.000241525	0.00022558	0.00024139	0.000238727	0.000242849	0.000218534	0.000245958
		YGL199C	1066	1027	1162	868	740	947	866	899	1044	1127	988	1012	823	1012	854	811	832	922	778	886	757	823	513	344	341	280	165	201	805	1040							YGL199C	0.000377207	0.000383775	0.000403429	0.000380478	0.000362889	0.000379728	0.000379336	0.000371927	0.00040887	0.000394302
		YGL200C	0	0	0	0	0	0	0	0	0	0	0	0	0	0	0	0	0	0	0	0	0	0	0	0	0	0	0	0	0	0							YGL200C	0	0	0	0	0	0	0	0	0	0
		YGL202W	0	0	0	0	0	0	0	0	0	0	0	0	0	0	0	0	0	0	0	0	0	0	0	0	0	0	0	0	0	0							YGL202W	0	0	0	0	0	0	0	0	0	0
		YGL203C	0	0	0	0	0	0	0	0	0	0	0	0	0	0	0	0	0	0	0	0	0	0	0	0	0	0	0	0	0	0							YGL203C	0	0	0	0	0	0	0	0	0	0
		YGL205W	753	796	908	660	584	741	737	741	831	877	830	817	697	824	584	627	827	873	708	837	722	815	538	507	333	343	188	195	524	545							YGL205W	0.000266451	0.000297454	0.000315244	0.000289304	0.000286388	0.000297126	0.000322829	0.000306561	0.000325451	0.000306835
		YGL206C	0	0	0	0	0	0	0	0	0	0	0	0	0	0	0	0	0	0	0	0	0	0	0	0	0	0	0	0	0	0							YGL206C	0	0	0	0	0	0	0	0	0	0
		YGL208W	810	739	870	694	547	725	656	691	744	873	831	767	725	727	623	632	755	884	591	731	600	756	497	400	324	243	164	162	508	546							YGL208W	0.000286621	0.000276154	0.000302051	0.000304207	0.000268244	0.00029071	0.000287349	0.000285875	0.000291379	0.000305435
		YGL209W	875	842	845	675	651	744	693	714	764	925	817	851	738	805	664	681	829	917	748	849	1131	1411	1697	1738	2407	2392	1963	2258	526	674							YGL209W	0.000309621	0.000314643	0.000293372	0.000295879	0.000319244	0.000298329	0.000303556	0.000295391	0.000299211	0.000323628
		YGL210W	11	7	4	8	5	5	6	3	3	3	5	3	2	3	7	3	3	4	7	4	2	4	3	7	5	3	1	3	0	1							YGL210W	3.89238e-06	2.6158e-06	1.38874e-06	3.50671e-06	2.45195e-06	2.0049e-06	2.62819e-06	1.24114e-06	1.17491e-06	1.04961e-06
		YGL211W	0	0	0	0	0	0	0	0	0	0	0	0	0	0	0	0	0	0	0	0	0	1	0	0	0	0	0	0	0	1							YGL211W	0	0	0	0	0	0	0	0	0	0
		YGL212W	217	273	209	185	160	226	166	197	195	254	158	195	156	179	210	231	186	191	301	274	340	441	331	249	305	374	229	209	734	1035							YGL212W	7.67861e-05	0.000102016	7.25617e-05	8.10928e-05	7.84625e-05	9.06214e-05	7.27133e-05	8.15013e-05	7.63694e-05	8.88666e-05
		YGL213C	540	538	497	411	368	445	369	363	426	400	421	366	354	338	399	349	542	602	562	524	464	654	537	385	416	306	175	175	453	628							YGL213C	0.000191081	0.000201043	0.000172551	0.000180157	0.000180464	0.000178436	0.000161634	0.000150178	0.000166838	0.000139947
		YGL214W	639	667	635	521	424	556	519	450	467	576	523	472	421	466	491	477	655	629	598	589	601	707	571	314	418	384	225	253	628	744							YGL214W	0.000226112	0.000249248	0.000220463	0.000228375	0.000207926	0.000222945	0.000227339	0.000186171	0.000182895	0.000201524
		YGL215W	0	0	0	2	0	0	1	1	0	0	0	0	0	1	0	0	0	0	0	0	0	1	0	0	0	0	0	0	1	1							YGL215W	0	0	0	8.76679e-07	0	0	4.38032e-07	4.13712e-07	0	0
		YGL216W	0	0	0	0	0	0	0	0	0	0	0	0	0	0	0	0	0	0	0	0	0	0	0	0	0	0	0	0	0	0							YGL216W	0	0	0	0	0	0	0	0	0	0
		YGL217C	1176	1093	1257	868	816	1011	939	939	1104	1159	1117	1041	898	1019	941	845	1014	1057	957	952	832	1010	677	471	529	435	292	309	999	1202							YGL217C	0.000416131	0.000408439	0.000436412	0.000380478	0.000400159	0.000405391	0.000411312	0.000388476	0.000432368	0.000405498
		YGL218W	463	477	372	329	185	254	197	248	193	237	156	163	133	133	199	229	132	104	111	112	122	111	196	123	247	193	125	136	558	786							YGL218W	0.000163834	0.000178248	0.000129153	0.000144214	9.07223e-05	0.000101849	8.62923e-05	0.000102601	7.55861e-05	8.29188e-05
		YGL219C	0	0	0	0	0	0	0	0	0	0	0	0	0	0	0	0	0	0	0	0	0	0	0	0	0	0	0	0	0	0							YGL219C	0	0	0	0	0	0	0	0	0	0
		YGL220W	0	0	0	0	0	0	0	0	0	0	0	0	0	0	0	0	0	0	0	0	0	0	0	0	0	0	0	0	0	0							YGL220W	0	0	0	0	0	0	0	0	0	0
		YGL221C	829	771	826	636	644	793	614	731	799	752	727	777	675	709	615	600	819	877	660	792	633	773	492	353	296	262	156	190	550	643							YGL221C	0.000293344	0.000288112	0.000286775	0.000278784	0.000315812	0.000317977	0.000268952	0.000302424	0.000312919	0.000263101
		YGL222C	714	639	692	503	484	579	560	587	590	671	627	592	492	551	489	414	555	511	415	413	391	495	338	292	259	205	128	136	514	576							YGL222C	0.000252651	0.000238785	0.000240252	0.000220485	0.000237349	0.000232167	0.000245298	0.000242849	0.000231066	0.000234762
		YGL223C	0	0	0	0	0	0	0	0	0	0	0	0	0	0	0	0	0	0	0	0	0	0	0	1	0	0	0	0	0	0							YGL223C	0	0	0	0	0	0	0	0	0	0
		YGL224C	0	0	0	0	0	0	0	0	0	0	0	0	0	0	0	0	0	0	0	1	0	0	0	0	0	0	0	0	0	0							YGL224C	0	0	0	0	0	0	0	0	0	0
		YGL226C-A	766	745	768	669	577	701	573	694	688	800	766	692	596	753	636	592	736	789	541	592	552	711	443	419	316	304	170	192	547	671							YGL226C-A	0.000271051	0.000278396	0.000266638	0.000293249	0.000282955	0.000281087	0.000250992	0.000287116	0.000269447	0.000279895
		YGL226W	1	2	5	3	4	6	3	6	2	6	2	3	1	2	2	2	0	1	3	1	0	0	0	0	0	1	0	0	0	0							YGL226W	3.53853e-07	7.47372e-07	1.73593e-06	1.31502e-06	1.96156e-06	2.40588e-06	1.3141e-06	2.48227e-06	7.83276e-07	2.09921e-06
		YGL227W	825	791	863	757	614	808	701	752	759	866	755	796	624	774	669	647	791	774	630	703	582	807	521	514	413	400	275	332	590	658							YGL227W	0.000291929	0.000295585	0.000299621	0.000331823	0.0003011	0.000323992	0.00030706	0.000311112	0.000297253	0.000302986
		YGL228W	1381	1233	1503	1048	985	1171	1133	1157	1203	1347	1295	1219	1117	1272	1035	911	1188	1289	913	978	784	956	560	452	343	292	165	182	1081	1288							YGL228W	0.000488671	0.000460755	0.00052182	0.00045938	0.000483035	0.000469547	0.00049629	0.000478665	0.000471141	0.000471273
		YGL229C	0	0	0	0	0	0	0	0	0	0	0	0	0	0	0	0	0	0	0	0	0	0	0	0	0	0	0	0	0	0							YGL229C	0	0	0	0	0	0	0	0	0	0
		YGL230C	916	883	934	771	688	824	796	804	830	933	839	836	758	851	743	676	971	978	883	945	805	1001	561	552	419	362	180	229	611	739							YGL230C	0.000324129	0.000329965	0.000324271	0.00033796	0.000337389	0.000330407	0.000348673	0.000332625	0.00032506	0.000326427
		YGL231C	973	835	996	777	740	903	810	840	875	952	950	956	719	874	735	700	988	1084	1046	1080	959	1175	691	609	510	369	214	241	437	580							YGL231C	0.000344299	0.000312028	0.000345797	0.00034059	0.000362889	0.000362085	0.000354806	0.000347518	0.000342683	0.000333075
		YGL232W	693	659	698	549	470	636	568	610	548	669	671	586	538	606	562	482	505	565	235	248	120	173	144	160	104	96	70	79	500	594							YGL232W	0.00024522	0.000246259	0.000242335	0.000240648	0.000230484	0.000255023	0.000248802	0.000252364	0.000214618	0.000234062
		YGL234W	6	5	3	1	0	1	3	2	3	7	3	2	1	1	2	1	2	4	4	1	3	3	2	4	0	2	1	1	0	2							YGL234W	2.12312e-06	1.86843e-06	1.04156e-06	4.38339e-07	0	4.0098e-07	1.3141e-06	8.27424e-07	1.17491e-06	2.44908e-06
		YGL235W	1512	1345	1636	1177	1140	1373	1186	1246	1457	1572	1488	1376	1303	1501	1198	1147	1400	1382	1097	1092	618	663	345	329	257	219	136	181	1115	1379							YGL235W	0.000535026	0.000502607	0.000567995	0.000515925	0.000559045	0.000550545	0.000519506	0.000515485	0.000570617	0.000549993
		YGL236C	621	605	713	595	469	629	570	544	671	679	633	603	610	649	588	479	599	605	468	437	244	288	140	123	96	89	82	90	519	663							YGL236C	0.000219743	0.00022608	0.000247543	0.000260812	0.000229993	0.000252216	0.000249678	0.000225059	0.000262789	0.000237561
		YGL237C	0	0	0	0	0	0	0	0	0	0	0	0	0	0	0	0	0	0	0	0	0	0	0	0	0	0	0	0	0	0							YGL237C	0	0	0	0	0	0	0	0	0	0
		YGL240W	362	403	379	300	187	308	198	259	208	246	185	188	151	150	195	196	158	133	156	147	184	254	376	279	618	681	813	713	712	852							YGL240W	0.000128095	0.000150595	0.000131583	0.000131502	9.1703e-05	0.000123502	8.67303e-05	0.000107151	8.14607e-05	8.60676e-05
		YGL241W	1	0	1	0	0	0	0	0	0	0	0	0	0	0	0	1	0	0	0	0	0	0	0	1	0	0	0	0	0	0							YGL241W	3.53853e-07	0	3.47185e-07	0	0	0	0	0	0	0
		YGL242C	529	488	549	420	369	418	364	419	425	489	421	391	375	383	414	300	445	505	395	418	332	396	197	205	170	149	146	98	407	510							YGL242C	0.000187188	0.000182359	0.000190605	0.000184102	0.000180954	0.00016761	0.000159444	0.000173345	0.000166446	0.000171086
		YGL243W	736	767	820	574	568	700	585	615	666	783	712	629	614	639	585	476	696	694	563	546	576	664	424	343	319	259	172	191	439	558							YGL243W	0.000260436	0.000286617	0.000284692	0.000251607	0.000278542	0.000280686	0.000256249	0.000254433	0.000260831	0.000273947
		YGL244W	124	141	122	131	116	124	112	88	116	120	109	78	91	75	91	95	41	46	59	63	86	91	96	63	89	98	60	39	340	466							YGL244W	4.38778e-05	5.26897e-05	4.23566e-05	5.74224e-05	5.68853e-05	4.97215e-05	4.90596e-05	3.64067e-05	4.543e-05	4.19842e-05
		YGL246C	16	19	27	13	4	11	4	10	8	3	1	2	0	1	5	2	1	1	0	2	0	0	0	1	0	0	0	0	113	127							YGL246C	5.66165e-06	7.10003e-06	9.374e-06	5.69841e-06	1.96156e-06	4.41078e-06	1.75213e-06	4.13712e-06	3.1331e-06	1.04961e-06
		YGL248W	855	838	978	738	608	798	733	783	845	955	796	897	722	785	684	719	864	840	778	785	763	879	659	492	449	427	298	294	621	761							YGL248W	0.000302544	0.000313149	0.000339547	0.000323494	0.000298157	0.000319982	0.000321077	0.000323937	0.000330934	0.000334124
		YGL249W	710	658	793	581	475	611	577	585	668	653	665	626	530	582	572	492	707	724	725	700	770	853	583	502	364	355	204	193	455	594							YGL249W	0.000251236	0.000245885	0.000275318	0.000254675	0.000232936	0.000244999	0.000252744	0.000242022	0.000261614	0.000228464
		YGL250W	5	10	16	10	8	11	13	19	9	18	17	8	9	8	6	9	7	14	5	7	2	1	6	0	1	2	1	1	1	0							YGL250W	1.76926e-06	3.73686e-06	5.55497e-06	4.38339e-06	3.92312e-06	4.41078e-06	5.69441e-06	7.86053e-06	3.52474e-06	6.29763e-06
		YGL251C	552	565	606	467	466	549	457	519	630	625	645	559	559	552	498	522	635	574	579	607	525	683	419	248	321	282	218	185	374	494							YGL251C	0.000195327	0.000211132	0.000210394	0.000204704	0.000228522	0.000220138	0.000200181	0.000214717	0.000246732	0.000218668
		YGL252C	624	570	627	413	353	465	376	316	281	329	219	235	123	162	403	373	532	527	798	932	971	1333	1914	1705	3913	3511	4558	4485	439	475							YGL252C	0.000220804	0.000213001	0.000217685	0.000181034	0.000173108	0.000186456	0.0001647	0.000130733	0.00011005	0.000115107
		YGL253W	786	812	1061	713	626	796	733	756	788	778	722	586	527	535	722	636	2127	2078	10763	9727	27073	30459	80647	63367	176313	156004	211896	173791	672	749							YGL253W	0.000278128	0.000303433	0.000368364	0.000312536	0.000306984	0.00031918	0.000321077	0.000312766	0.000308611	0.000272198
		YGL254W	844	718	858	680	631	742	639	716	732	869	746	764	677	812	609	577	799	870	733	724	646	805	545	506	350	281	169	163	613	700							YGL254W	0.000298652	0.000268306	0.000297885	0.000298071	0.000309436	0.000297527	0.000279902	0.000296218	0.000286679	0.000304036
		YGL255W	0	0	0	0	0	0	0	0	0	0	0	0	0	0	0	0	0	0	0	0	0	0	0	0	0	0	0	0	0	0							YGL255W	0	0	0	0	0	0	0	0	0	0
		YGL256W	0	0	0	0	0	0	0	0	0	0	0	0	0	0	0	0	0	0	0	0	0	0	0	0	0	0	0	0	0	0							YGL256W	0	0	0	0	0	0	0	0	0	0
		YGL257C	877	811	955	713	654	777	730	798	788	879	824	813	787	776	689	624	798	834	658	732	719	906	563	573	392	296	218	191	578	781							YGL257C	0.000310329	0.000303059	0.000331562	0.000312536	0.000320715	0.000311561	0.000319763	0.000330142	0.000308611	0.000307534
		YGL258W	796	695	929	665	669	729	657	707	685	770	841	767	624	782	610	579	769	801	685	766	729	842	581	408	386	405	213	212	577	624							YGL258W	0.000281667	0.000259712	0.000322535	0.000291496	0.000328071	0.000292314	0.000287787	0.000292495	0.000268272	0.000269399
		YGL259W	860	734	874	721	612	693	633	666	728	804	813	811	724	741	643	608	788	846	750	728	649	870	561	558	342	349	175	264	523	602							YGL259W	0.000304314	0.000274285	0.00030344	0.000316043	0.000300119	0.000277879	0.000277274	0.000275532	0.000285113	0.000281294
		YGL260W	751	702	806	624	558	682	633	669	667	778	701	639	599	686	591	569	717	706	607	717	569	752	475	415	301	257	162	185	537	640							YGL260W	0.000265744	0.000262327	0.000279831	0.000273524	0.000273638	0.000273468	0.000277274	0.000276773	0.000261223	0.000272198
		YGL261C	766	673	830	614	487	674	608	632	714	768	736	682	644	702	596	539	692	703	652	685	651	731	414	306	260	215	137	146	573	692							YGL261C	0.000271051	0.000251491	0.000288164	0.00026914	0.00023882	0.00027026	0.000266323	0.000261466	0.00027963	0.000268699
		YGL262W	813	775	906	683	636	795	675	730	750	915	816	791	685	789	657	665	788	815	738	795	693	835	486	447	334	250	143	155	532	707							YGL262W	0.000287682	0.000289606	0.00031455	0.000299386	0.000311888	0.000318779	0.000295672	0.00030201	0.000293729	0.00032013
		YGL263W	0	0	0	0	0	0	0	0	0	0	0	0	0	0	0	0	0	0	0	0	0	1	0	0	0	1	0	0	0	0							YGL263W	0	0	0	0	0	0	0	0	0	0
		YGR001C	0	0	0	1	0	0	0	0	0	0	0	0	0	0	0	0	0	0	0	0	0	0	0	0	0	0	0	0	0	0							YGR001C	0	0	0	4.38339e-07	0	0	0	0	0	0
		YGR003W	987	1040	1028	828	766	1007	860	999	1005	1117	944	925	861	971	832	811	926	1060	970	985	927	1126	813	693	577	488	283	325	617	803							YGR003W	0.000349253	0.000388633	0.000356907	0.000362945	0.000375639	0.000403787	0.000376707	0.000413299	0.000393596	0.000390803
		YGR004W	0	0	0	0	0	0	0	0	0	0	0	0	0	0	0	0	0	0	0	0	0	0	1	1	0	0	0	0	0	0							YGR004W	0	0	0	0	0	0	0	0	0	0
		YGR006W	0	0	0	0	0	0	0	0	0	0	0	0	0	0	0	0	0	0	0	0	1	0	0	0	0	0	0	0	0	0							YGR006W	0	0	0	0	0	0	0	0	0	0
		YGR007W	797	722	702	587	579	684	592	698	746	805	743	729	643	699	548	570	545	549	403	417	438	564	421	428	290	265	188	176	556	699							YGR007W	0.000282021	0.000269801	0.000243724	0.000257305	0.000283936	0.00027427	0.000259315	0.000288771	0.000292162	0.000281644
		YGR008C	936	811	897	751	686	870	784	847	869	909	890	877	761	858	756	682	819	939	791	818	653	870	548	508	336	277	177	195	564	622							YGR008C	0.000331206	0.000303059	0.000311425	0.000329193	0.000336408	0.000348852	0.000343417	0.000350414	0.000340333	0.00031803
		YGR010W	1036	935	1025	787	751	815	830	929	1013	1121	984	979	815	904	850	702	935	987	861	997	847	967	702	618	506	409	211	232	621	704							YGR010W	0.000366592	0.000349396	0.000355865	0.000344973	0.000368283	0.000326799	0.000363566	0.000384339	0.000396729	0.000392203
		YGR011W	1737	1627	1819	1468	1333	1481	1502	1645	1744	1951	1766	1754	1491	1687	1427	1293	1652	1766	1593	1618	1414	1842	1193	1042	834	724	371	426	985	1234							YGR011W	0.000614643	0.000607987	0.00063153	0.000643482	0.000653691	0.000593851	0.000657924	0.000680557	0.000683017	0.000682593
		YGR012W	829	775	823	592	595	790	670	728	782	844	812	725	728	854	589	601	779	824	585	625	518	621	398	443	317	257	160	157	541	677							YGR012W	0.000293344	0.000289606	0.000285734	0.000259497	0.000291782	0.000316774	0.000293481	0.000301183	0.000306261	0.000295289
		YGR014W	1016	947	981	848	824	914	791	885	925	991	1034	1020	866	960	848	770	1011	1006	805	960	750	965	586	502	307	292	150	209	609	740							YGR014W	0.000359515	0.00035388	0.000340589	0.000371712	0.000404082	0.000366496	0.000346483	0.000366135	0.000362265	0.00034672
		YGR015C	0	0	0	0	0	0	0	0	0	0	0	0	0	0	0	0	0	0	0	0	0	0	0	0	0	0	0	0	0	0							YGR015C	0	0	0	0	0	0	0	0	0	0
		YGR016W	0	0	0	0	0	0	0	0	0	0	0	0	0	0	0	0	0	0	0	0	0	0	0	0	0	0	0	0	0	0							YGR016W	0	0	0	0	0	0	0	0	0	0
		YGR017W	803	693	742	664	555	680	621	660	731	822	719	698	527	701	588	573	756	723	611	721	598	691	398	285	199	150	87	90	590	727							YGR017W	0.000284144	0.000258964	0.000257612	0.000291057	0.000272167	0.000272666	0.000272018	0.00027305	0.000286287	0.000287592
		YGR018C	874	738	796	646	546	669	666	699	674	776	736	692	634	680	664	555	714	756	610	622	468	644	307	294	141	130	58	67	500	633							YGR018C	0.000309267	0.00027578	0.00027636	0.000283167	0.000267753	0.000268256	0.000291729	0.000289185	0.000263964	0.000271498
		YGR019W	1176	1276	1285	987	973	1157	1026	1170	1246	1457	1201	1271	1103	1197	1021	1039	1582	1499	1808	1803	1541	1990	1319	1100	817	645	252	289	535	654							YGR019W	0.000416131	0.000476823	0.000446133	0.000432641	0.00047715	0.000463934	0.000449421	0.000484043	0.000487981	0.000509758
		YGR020C	0	0	0	0	0	0	0	0	0	0	0	0	0	0	0	0	0	0	0	0	0	0	0	0	0	0	0	0	0	0							YGR020C	0	0	0	0	0	0	0	0	0	0
		YGR021W	0	1	0	0	0	1	0	0	0	1	0	0	1	0	0	0	1	0	2	0	0	0	0	0	0	0	0	0	0	0							YGR021W	0	3.73686e-07	0	0	0	4.0098e-07	0	0	0	3.49868e-07
		YGR022C	1923	1793	1902	1359	1393	1464	1402	1484	1750	1820	1553	1636	1377	1615	1406	1332	1728	1679	1625	1696	1661	2118	1445	1371	890	705	483	495	1089	1293							YGR022C	0.000680459	0.000670019	0.000660347	0.000595703	0.000683114	0.000587034	0.000614121	0.000613949	0.000685367	0.000636761
		YGR023W	1118	973	1026	719	700	826	819	941	888	990	994	906	879	931	770	695	1019	965	956	1014	1025	1406	895	912	607	497	311	356	504	765							YGR023W	0.000395608	0.000363596	0.000356212	0.000315166	0.000343273	0.000331209	0.000358748	0.000389303	0.000347775	0.00034637
		YGR025W	1843	1665	1787	1433	1433	1549	1507	1542	1783	1819	1677	1631	1529	1590	1550	1438	1766	1917	1624	1751	1589	1829	1312	1170	960	824	595	605	1190	1416							YGR025W	0.000652151	0.000622187	0.00062042	0.00062814	0.00070273	0.000621118	0.000660114	0.000637944	0.000698291	0.000636411
		YGR026W	630	653	677	554	525	591	588	593	627	652	662	645	559	658	548	513	627	766	622	676	584	692	488	500	362	316	187	223	454	526							YGR026W	0.000222927	0.000244017	0.000235044	0.00024284	0.000257455	0.000236979	0.000257563	0.000245331	0.000245557	0.000228114
		YGR027C	448	528	412	398	265	332	279	241	270	315	316	273	216	262	261	262	400	456	492	438	367	422	266	211	119	117	61	65	535	711							YGR027C	0.000158526	0.000197306	0.00014304	0.000174459	0.000129953	0.000133125	0.000122211	9.97047e-05	0.000105742	0.000110209
		YGR028W	1061	1100	1123	834	797	922	861	943	1035	1100	1052	985	894	976	908	830	1004	1043	920	1006	783	905	502	478	270	252	134	164	584	725							YGR028W	0.000375438	0.000411054	0.000389889	0.000365575	0.000390841	0.000369703	0.000377145	0.000390131	0.000405345	0.000384855
		YGR031W	1012	944	809	787	739	878	839	928	947	988	894	922	780	904	764	691	1081	1124	2263	2213	3914	4119	9806	8681	22880	21218	26448	26050	736	961							YGR031W	0.000358099	0.000352759	0.000280873	0.000344973	0.000362399	0.00035206	0.000367509	0.000383925	0.000370881	0.00034567
		YGR032W	1197	1117	1208	948	862	1085	996	1027	1145	1242	1209	1037	966	1030	914	889	1008	1082	926	934	857	992	577	636	347	343	215	254	711	830							YGR032W	0.000423562	0.000417407	0.0004194	0.000415546	0.000422717	0.000435063	0.00043628	0.000424882	0.000448426	0.000434537
		YGR033C	0	0	0	0	0	0	0	0	0	0	0	0	0	0	0	0	0	0	0	0	0	0	0	0	0	0	0	0	0	0							YGR033C	0	0	0	0	0	0	0	0	0	0
		YGR034W	613	691	649	505	420	471	411	431	422	482	422	405	378	369	479	418	488	479	481	457	139	152	63	51	33	46	51	30	559	691							YGR034W	0.000216912	0.000258217	0.000225323	0.000221361	0.000205964	0.000188862	0.000180031	0.00017831	0.000165271	0.000168637
		YGR035C	362	376	377	299	289	327	320	379	287	358	285	304	282	255	274	249	181	239	173	197	151	212	173	114	66	60	47	48	499	612							YGR035C	0.000128095	0.000140506	0.000130889	0.000131063	0.000141723	0.00013112	0.00014017	0.000156797	0.0001124	0.000125253
		YGR035W-A	0	0	0	0	0	0	0	0	0	0	0	0	0	0	0	0	0	0	0	0	0	0	0	0	1	0	0	0	0	0							YGR035W-A	0	0	0	0	0	0	0	0	0	0
		YGR036C	0	0	0	0	0	0	0	0	0	0	0	0	0	0	0	0	0	0	0	0	0	0	0	0	0	0	0	0	0	0							YGR036C	0	0	0	0	0	0	0	0	0	0
		YGR037C	0	0	0	0	0	0	0	0	0	0	0	0	0	0	0	0	0	0	0	0	0	0	0	0	0	0	0	0	0	0							YGR037C	0	0	0	0	0	0	0	0	0	0
		YGR038W	1165	1160	1186	942	910	1065	987	1087	1153	1185	1165	1163	1088	1116	1061	813	1114	1120	851	1039	752	1038	616	618	431	387	213	263	652	774							YGR038W	0.000412239	0.000433476	0.000411762	0.000412916	0.000446255	0.000427044	0.000432337	0.000449705	0.000451559	0.000414594
		YGR039W	863	786	909	691	662	824	786	826	864	991	937	856	795	860	725	638	820	883	841	807	700	784	498	320	293	240	219	141	525	747							YGR039W	0.000305375	0.000293717	0.000315591	0.000302892	0.000324639	0.000330407	0.000344293	0.000341726	0.000338375	0.00034672
		YGR040W	1142	1116	1281	920	895	1025	988	975	1129	1210	1219	1037	1043	1037	986	894	1054	1146	1001	1097	954	1213	887	770	673	583	381	362	598	843							YGR040W	0.0004041	0.000417033	0.000444744	0.000403272	0.0004389	0.000411004	0.000432775	0.000403369	0.000442159	0.000423341
		YGR041W	0	0	0	0	0	0	0	0	0	0	0	0	0	0	0	0	0	0	0	0	0	0	0	0	0	0	0	0	0	0							YGR041W	0	0	0	0	0	0	0	0	0	0
		YGR042W	377	421	492	437	428	539	529	553	433	702	576	605	546	630	487	469	415	538	414	444	225	208	169	51	123	102	76	68	131	135							YGR042W	0.000133403	0.000157322	0.000170815	0.000191554	0.000209887	0.000216128	0.000231719	0.000228783	0.000169579	0.000245608
		YGR043C	16	22	40	34	17	39	28	30	28	35	28	29	22	40	20	17	18	19	21	24	6	6	5	0	4	2	7	2	0	4							YGR043C	5.66165e-06	8.22109e-06	1.38874e-05	1.49035e-05	8.33664e-06	1.56382e-05	1.22649e-05	1.24114e-05	1.09659e-05	1.22454e-05
		YGR044C	965	941	1017	777	750	837	826	916	887	973	929	948	759	846	816	764	931	977	903	997	836	955	695	544	586	487	299	337	561	678							YGR044C	0.000341468	0.000351638	0.000353087	0.00034059	0.000367793	0.00033562	0.000361814	0.00037896	0.000347383	0.000340422
		YGR045C	986	979	968	797	696	867	797	820	924	1053	968	941	750	951	770	767	926	982	813	935	901	1048	690	600	543	450	292	316	557	693							YGR045C	0.000348899	0.000365838	0.000336075	0.000349356	0.000341312	0.00034765	0.000349111	0.000339244	0.000361874	0.000368411
		YGR049W	0	0	0	0	0	0	0	0	0	0	0	0	0	0	0	0	0	0	0	0	0	0	0	0	0	0	0	0	0	0							YGR049W	0	0	0	0	0	0	0	0	0	0
		YGR050C	2621	2610	2930	2464	2132	2630	2432	2670	2935	3058	2996	2745	2526	2815	2428	2192	2612	2603	2844	3135	1446	1513	556	500	353	374	280	313	911	1070							YGR050C	0.000927448	0.00097532	0.00101725	0.00108007	0.00104551	0.00105458	0.00106529	0.00110461	0.00114946	0.0010699
		YGR051C	1238	1130	1285	989	943	1114	979	1072	1197	1237	1209	1263	1172	1116	1011	890	1172	1221	1028	1145	885	1201	737	635	498	449	227	259	570	715							YGR051C	0.00043807	0.000422265	0.000446133	0.000433518	0.000462438	0.000446692	0.000428833	0.0004435	0.000468791	0.000432787
		YGR052W	1307	1198	1313	1005	961	1102	1049	1082	1268	1374	1220	1232	1083	1315	1022	988	1216	1248	1041	1265	1039	1274	831	695	558	456	256	305	677	745							YGR052W	0.000462486	0.000447676	0.000455854	0.000440531	0.000471265	0.00044188	0.000459495	0.000447637	0.000496597	0.000480719
		YGR053C	1160	1231	1220	929	944	1093	970	1079	1273	1342	1158	1202	1067	1154	1070	1042	1117	1103	1029	1146	918	1077	697	667	527	418	319	292	725	777							YGR053C	0.000410469	0.000460007	0.000423566	0.000407217	0.000462929	0.000438271	0.000424891	0.000446396	0.000498555	0.000469523
		YGR054W	680	673	674	505	417	521	466	487	523	629	509	475	447	454	479	537	489	561	617	593	657	768	474	398	288	235	172	154	601	758							YGR054W	0.00024062	0.000251491	0.000234003	0.000221361	0.000204493	0.00020891	0.000204123	0.000201478	0.000204827	0.000220067
		YGR055W	820	834	781	613	646	687	640	735	743	800	745	736	585	631	621	595	737	817	874	995	825	950	612	536	336	240	122	111	615	757							YGR055W	0.000290159	0.000311654	0.000271152	0.000268702	0.000316792	0.000275473	0.00028034	0.000304078	0.000290987	0.000279895
		YGR056W	0	0	0	0	0	0	0	0	0	0	0	0	0	0	0	0	0	0	0	0	0	0	0	0	0	0	0	0	0	0							YGR056W	0	0	0	0	0	0	0	0	0	0
		YGR057C	949	901	893	709	580	759	758	698	824	835	690	748	637	606	811	670	888	928	1712	1722	2367	2472	1524	1220	885	604	385	277	538	664							YGR057C	0.000335806	0.000336691	0.000310037	0.000310783	0.000284427	0.000304344	0.000332028	0.000288771	0.00032271	0.00029214
		YGR058W	585	501	609	492	456	509	435	496	514	607	546	503	428	496	444	398	499	495	495	538	485	568	482	406	318	296	213	229	490	646							YGR058W	0.000207004	0.000187217	0.000211436	0.000215663	0.000223618	0.000204099	0.000190544	0.000205201	0.000201302	0.00021237
		YGR059W	0	0	5	3	3	6	3	4	1	10	2	2	0	1	1	0	2	2	0	1	0	1	0	0	1	1	1	0	0	0							YGR059W	0	0	1.73593e-06	1.31502e-06	1.47117e-06	2.40588e-06	1.3141e-06	1.65485e-06	3.91638e-07	3.49868e-06
		YGR061C	550	591	602	465	445	516	504	508	533	552	513	537	440	490	460	492	608	635	841	797	706	725	304	323	154	125	62	66	524	630							YGR061C	0.000194619	0.000220848	0.000209006	0.000203828	0.000218224	0.000206906	0.000220768	0.000210166	0.000208743	0.000193127
		YGR062C	0	0	0	0	0	0	0	0	0	0	0	0	0	0	0	0	0	0	0	0	0	0	0	0	0	0	0	0	0	0							YGR062C	0	0	0	0	0	0	0	0	0	0
		YGR063C	0	0	0	0	0	0	0	0	0	0	0	0	0	0	0	0	0	0	0	0	0	0	0	0	0	0	0	0	0	0							YGR063C	0	0	0	0	0	0	0	0	0	0
		YGR064W	0	0	0	0	0	0	0	0	0	0	0	0	0	0	0	0	0	0	0	0	0	0	0	0	0	0	0	0	0	0							YGR064W	0	0	0	0	0	0	0	0	0	0
		YGR066C	0	0	0	0	0	0	0	0	0	0	0	0	0	0	0	0	0	0	0	0	0	0	0	0	0	0	0	0	0	0							YGR066C	0	0	0	0	0	0	0	0	0	0
		YGR067C	884	900	877	681	642	748	679	886	895	951	870	818	775	818	736	613	758	858	762	733	743	836	568	513	378	351	251	264	605	755							YGR067C	0.000312806	0.000336317	0.000304482	0.000298509	0.000314831	0.000299933	0.000297424	0.000366549	0.000350516	0.000332725
		YGR068C	784	760	829	670	590	753	611	725	687	806	714	713	638	653	601	530	786	757	714	753	683	836	561	511	351	355	190	174	513	661							YGR068C	0.000277421	0.000284001	0.000287817	0.000293687	0.00028933	0.000301938	0.000267637	0.000299941	0.000269055	0.000281994
		YGR069W	620	607	702	611	564	666	596	737	601	763	708	726	585	638	573	496	632	713	604	696	491	492	365	167	263	255	175	164	341	337							YGR069W	0.000219389	0.000226827	0.000243724	0.000267825	0.00027658	0.000267053	0.000261067	0.000304906	0.000235374	0.00026695
		YGR070W	19	19	44	28	28	40	24	34	31	28	35	26	17	32	22	20	23	28	16	30	10	8	5	0	3	7	2	4	9	2							YGR070W	6.72321e-06	7.10003e-06	1.52762e-05	1.22735e-05	1.37309e-05	1.60392e-05	1.05128e-05	1.40662e-05	1.21408e-05	9.79632e-06
		YGR071C	928	901	997	805	695	888	781	870	872	1026	917	884	755	852	733	704	1057	1154	1327	1472	1224	1352	547	503	279	232	134	154	723	854							YGR071C	0.000328376	0.000336691	0.000346144	0.000352863	0.000340821	0.00035607	0.000342103	0.00035993	0.000341508	0.000358965
		YGR072W	0	0	0	0	0	0	0	0	0	0	0	0	0	0	0	0	0	0	0	0	0	0	0	0	0	0	0	0	0	1							YGR072W	0	0	0	0	0	0	0	0	0	0
		YGR076C	0	0	0	0	0	0	0	0	0	0	0	0	0	0	0	0	0	0	0	0	0	0	0	0	0	0	0	0	0	0							YGR076C	0	0	0	0	0	0	0	0	0	0
		YGR077C	0	0	0	0	0	0	0	0	0	0	0	0	0	0	0	0	0	0	0	0	0	0	0	0	0	0	0	0	0	0							YGR077C	0	0	0	0	0	0	0	0	0	0
		YGR078C	66	74	59	42	23	49	37	38	34	29	44	32	24	35	33	31	14	24	10	17	15	12	6	6	7	0	1	0	164	247							YGR078C	2.33543e-05	2.76527e-05	2.04839e-05	1.84102e-05	1.1279e-05	1.9648e-05	1.62072e-05	1.57211e-05	1.33157e-05	1.01462e-05
		YGR079W	1197	928	1179	907	813	978	899	1000	1169	1185	1090	1204	995	1123	984	905	1148	1116	1159	1135	1187	1292	800	602	452	421	220	247	581	821							YGR079W	0.000423562	0.00034678	0.000409332	0.000397574	0.000398688	0.000392158	0.000393791	0.000413712	0.000457825	0.000414594
		YGR080W	937	847	872	771	636	759	742	806	883	899	836	803	740	847	807	660	880	816	683	736	581	693	305	282	204	138	117	106	502	636							YGR080W	0.00033156	0.000316512	0.000302746	0.00033796	0.000311888	0.000304344	0.00032502	0.000333452	0.000345816	0.000314532
		YGR081C	0	0	0	0	0	0	0	0	0	0	0	0	0	0	0	0	0	0	0	0	0	0	0	0	0	0	0	0	0	0							YGR081C	0	0	0	0	0	0	0	0	0	0
		YGR084C	784	792	797	616	616	719	685	718	742	917	779	771	640	723	577	547	642	637	564	557	364	424	206	186	132	118	82	73	546	740							YGR084C	0.000277421	0.000295959	0.000276707	0.000270017	0.000302081	0.000288305	0.000300052	0.000297045	0.000290595	0.000320829
		YGR085C	584	533	508	404	293	347	284	256	242	267	268	231	194	231	291	272	397	399	631	624	657	793	733	607	496	425	171	183	617	716							YGR085C	0.00020665	0.000199175	0.00017637	0.000177089	0.000143684	0.00013914	0.000124401	0.00010591	9.47764e-05	9.34149e-05
		YGR086C	771	699	768	621	589	641	657	650	652	909	784	776	690	753	715	561	586	681	483	536	558	675	525	501	451	312	251	222	483	600							YGR086C	0.000272821	0.000261206	0.000266638	0.000272209	0.00028884	0.000257028	0.000287787	0.000268913	0.000255348	0.00031803
		YGR087C	319	426	489	387	392	505	529	622	426	579	553	574	447	554	423	430	393	539	395	422	248	163	119	36	117	95	63	52	109	141							YGR087C	0.000112879	0.00015919	0.000169774	0.000169637	0.000192233	0.000202495	0.000231719	0.000257329	0.000166838	0.000202574
		YGR088W	924	834	893	720	719	880	769	807	849	984	901	784	752	807	730	686	795	846	759	737	596	806	512	492	295	277	160	210	561	703							YGR088W	0.00032696	0.000311654	0.000310037	0.000315604	0.000352591	0.000352862	0.000336846	0.000333866	0.000332501	0.000344271
		YGR089W	0	0	0	1	0	0	0	3	0	0	0	0	0	0	0	0	0	0	0	0	0	1	1	2	3	0	0	0	0	1							YGR089W	0	0	0	4.38339e-07	0	0	0	1.24114e-06	0	0
		YGR092W	0	0	0	0	0	0	0	0	0	0	0	0	0	0	0	0	0	0	0	0	0	0	0	0	0	0	0	0	0	0							YGR092W	0	0	0	0	0	0	0	0	0	0
		YGR093W	113	152	229	159	159	193	177	207	172	246	174	174	178	198	137	132	165	201	140	173	90	77	93	35	43	52	40	42	58	50							YGR093W	3.99854e-05	5.68002e-05	7.95054e-05	6.96959e-05	7.79721e-05	7.73891e-05	7.75316e-05	8.56384e-05	6.73617e-05	8.60676e-05
		YGR096W	0	0	0	0	0	0	0	0	0	0	0	0	0	0	0	0	0	0	0	0	0	0	0	0	0	0	0	0	0	0							YGR096W	0	0	0	0	0	0	0	0	0	0
		YGR097W	0	0	0	0	0	0	1	0	0	0	0	0	0	0	0	0	0	0	0	0	0	0	0	0	0	0	0	0	1	0							YGR097W	0	0	0	0	0	0	4.38032e-07	0	0	0
		YGR100W	933	779	879	745	616	765	729	774	860	919	885	844	718	883	724	666	756	755	559	700	469	558	287	191	142	121	69	73	594	830							YGR100W	0.000330145	0.000291101	0.000305176	0.000326563	0.000302081	0.00030675	0.000319325	0.000320213	0.000336809	0.000321529
		YGR101W	325	310	300	251	201	279	217	229	231	260	221	211	186	206	173	174	41	40	18	19	12	23	18	10	16	8	7	7	482	643							YGR101W	0.000115002	0.000115843	0.000104156	0.000110023	9.85685e-05	0.000111873	9.50529e-05	9.47401e-05	9.04684e-05	9.09658e-05
		YGR102C	0	0	0	0	0	0	0	0	0	0	0	0	0	0	0	0	0	0	0	0	0	0	0	0	0	0	0	0	0	0							YGR102C	0	0	0	0	0	0	0	0	0	0
		YGR104C	0	0	0	0	0	0	0	0	0	0	0	0	0	0	0	0	0	0	0	0	0	0	0	0	0	0	0	0	0	0							YGR104C	0	0	0	0	0	0	0	0	0	0
		YGR105W	0	0	0	0	0	0	0	0	0	0	0	0	0	0	0	0	0	0	0	0	0	0	0	0	0	0	0	0	0	0							YGR105W	0	0	0	0	0	0	0	0	0	0
		YGR106C	695	744	892	681	608	812	713	788	739	854	853	829	759	770	693	561	666	799	621	654	437	523	322	132	203	221	124	124	321	386							YGR106C	0.000245928	0.000278022	0.000309689	0.000298509	0.000298157	0.000325596	0.000312317	0.000326005	0.000289421	0.000298788
		YGR107W	0	0	0	0	0	0	0	0	0	0	0	0	0	0	0	0	0	0	0	0	0	0	0	0	0	0	0	0	0	0							YGR107W	0	0	0	0	0	0	0	0	0	0
		YGR108W	0	0	0	0	0	0	0	0	0	0	0	0	0	0	0	0	0	0	0	0	0	0	0	0	0	0	0	0	0	0							YGR108W	0	0	0	0	0	0	0	0	0	0
		YGR109C	1048	938	1009	816	710	935	858	846	1043	1019	943	949	827	904	804	693	833	920	811	806	711	864	527	504	361	345	174	217	668	788							YGR109C	0.000370838	0.000350517	0.00035031	0.000357685	0.000348177	0.000374916	0.000375831	0.000350001	0.000408478	0.000356516
		YGR110W	888	979	1020	863	773	981	903	968	930	1277	1074	1044	909	1073	873	862	925	1005	811	924	606	590	454	147	283	310	197	170	406	436							YGR110W	0.000314221	0.000365838	0.000354129	0.000378287	0.000379072	0.000393361	0.000395543	0.000400473	0.000364223	0.000446782
		YGR111W	837	727	807	695	659	775	636	761	866	975	848	780	661	716	632	566	721	810	687	682	609	830	477	441	370	264	202	164	493	716							YGR111W	0.000296175	0.00027167	0.000280179	0.000304646	0.000323167	0.000310759	0.000278588	0.000314835	0.000339159	0.000341122
		YGR112W	502	458	507	351	348	425	365	355	332	437	355	395	344	380	308	298	72	66	30	31	29	18	22	30	36	29	13	27	472	675							YGR112W	0.000177634	0.000171148	0.000176023	0.000153857	0.000170656	0.000170416	0.000159882	0.000146868	0.000130024	0.000152893
		YGR117C	1042	958	1005	852	801	910	892	936	952	1073	979	1038	927	1031	835	803	979	964	817	1027	852	938	632	492	390	338	202	270	550	660							YGR117C	0.000368715	0.000357991	0.000348921	0.000373465	0.000392803	0.000364892	0.000390724	0.000387235	0.000372839	0.000375409
		YGR118W	843	853	731	556	458	524	478	452	395	446	331	379	291	351	520	496	637	595	819	812	996	1163	1515	1132	568	437	106	111	667	856							YGR118W	0.000298298	0.000318754	0.000253792	0.000243717	0.000224599	0.000210113	0.000209379	0.000186998	0.000154697	0.000156041
		YGR121C	948	895	904	780	702	907	752	820	899	933	840	852	825	849	720	676	846	872	791	863	716	992	562	405	389	309	289	221	599	713							YGR121C	0.000335453	0.000334449	0.000313856	0.000341905	0.000344254	0.000363689	0.0003294	0.000339244	0.000352083	0.000326427
		YGR121W-A	0	0	0	0	0	0	0	0	0	0	0	0	0	0	0	0	0	0	0	0	0	0	0	0	0	0	0	0	0	0							YGR121W-A	0	0	0	0	0	0	0	0	0	0
		YGR122C-A	1070	1017	1172	843	877	997	888	929	990	1136	1032	1034	866	999	867	829	999	985	831	996	723	858	419	250	215	250	104	114	546	671							YGR122C-A	0.000378623	0.000380038	0.000406901	0.00036952	0.000430073	0.000399777	0.000388972	0.000384339	0.000387722	0.000397451
		YGR122W	0	0	0	0	0	0	0	0	0	0	0	0	0	0	0	0	0	0	0	0	0	0	0	0	0	0	0	0	0	0							YGR122W	0	0	0	0	0	0	0	0	0	0
		YGR123C	764	828	906	773	666	840	751	922	805	901	919	849	798	908	688	700	1023	1123	1256	1395	1136	1270	1279	702	1359	1199	958	964	354	415							YGR123C	0.000270344	0.000309412	0.00031455	0.000338836	0.0003266	0.000336823	0.000328962	0.000381443	0.000315269	0.000315231
		YGR124W	891	915	992	789	656	847	792	869	903	928	956	945	779	942	683	660	837	845	746	772	615	922	474	482	343	281	183	168	630	769							YGR124W	0.000315283	0.000341923	0.000344408	0.00034585	0.000321696	0.00033963	0.000346921	0.000359516	0.000353649	0.000324678
		YGR125W	738	690	784	661	590	645	608	628	771	860	704	669	610	681	550	594	647	639	578	674	569	710	469	394	343	266	183	163	531	736							YGR125W	0.000261143	0.000257843	0.000272193	0.000289742	0.00028933	0.000258632	0.000266323	0.000259811	0.000301953	0.000300887
		YGR126W	960	962	1001	813	680	954	817	918	928	1032	961	944	837	958	797	847	977	988	887	929	740	946	511	498	267	268	161	201	677	931							YGR126W	0.000339699	0.000359486	0.000347533	0.00035637	0.000333466	0.000382535	0.000357872	0.000379788	0.00036344	0.000361064
		YGR127W	699	667	668	522	486	552	516	556	643	643	590	563	540	614	517	493	652	631	584	631	539	676	445	538	277	224	175	143	344	482							YGR127W	0.000247343	0.000249248	0.00023192	0.000228813	0.00023833	0.000221341	0.000226024	0.000230024	0.000251823	0.000224965
		YGR129W	958	823	906	739	655	725	792	761	802	911	771	865	703	768	660	632	878	871	714	818	714	896	575	505	336	332	182	194	515	654							YGR129W	0.000338991	0.000307543	0.00031455	0.000323933	0.000321206	0.00029071	0.000346921	0.000314835	0.000314094	0.00031873
		YGR130C	42	42	78	79	59	75	60	75	65	81	59	75	62	73	54	40	43	59	44	53	24	20	10	11	20	16	10	8	17	18							YGR130C	1.48618e-05	1.56948e-05	2.70805e-05	3.46288e-05	2.8933e-05	3.00735e-05	2.62819e-05	3.10284e-05	2.54565e-05	2.83393e-05
		YGR131W	886	824	848	726	657	757	737	779	821	874	833	785	711	800	717	696	811	757	714	765	619	683	366	387	208	220	146	133	616	769							YGR131W	0.000313514	0.000307917	0.000294413	0.000318234	0.000322187	0.000303542	0.000322829	0.000322282	0.000321535	0.000305785
		YGR132C	0	0	1	0	0	4	1	3	0	2	1	0	0	0	0	2	0	0	0	0	0	0	1	0	0	0	0	0	0	1							YGR132C	0	0	3.47185e-07	0	0	1.60392e-06	4.38032e-07	1.24114e-06	0	6.99737e-07
		YGR133W	1082	985	1128	860	767	826	787	848	740	824	709	666	513	585	944	795	987	1184	876	897	984	1132	913	824	735	721	415	444	409	436							YGR133W	0.000382869	0.000368081	0.000391625	0.000376972	0.00037613	0.000331209	0.000344731	0.000350828	0.000289812	0.000288292
		YGR134W	949	822	914	713	660	756	699	728	825	801	788	726	727	724	665	711	837	794	706	737	642	837	583	557	295	270	165	165	564	724							YGR134W	0.000335806	0.00030717	0.000317327	0.000312536	0.000323658	0.000303141	0.000306184	0.000301183	0.000323101	0.000280245
		YGR135W	0	0	0	0	0	0	0	0	0	0	0	0	0	0	0	0	0	0	0	0	0	0	0	0	0	0	0	0	0	0							YGR135W	0	0	0	0	0	0	0	0	0	0
		YGR136W	853	902	961	742	675	814	721	854	847	977	855	879	789	880	735	702	830	936	731	821	710	904	549	426	406	400	204	246	525	568							YGR136W	0.000301837	0.000337065	0.000333645	0.000325248	0.000331014	0.000326398	0.000315821	0.00035331	0.000331717	0.000341821
		YGR137W	786	850	826	777	601	758	744	810	818	933	845	908	744	884	663	631	769	798	740	856	631	629	450	251	338	305	171	185	479	546							YGR137W	0.000278128	0.000317633	0.000286775	0.00034059	0.000294725	0.000303943	0.000325896	0.000335107	0.00032036	0.000326427
[truncated: 3,129 more rows]
[truncated: 20 more columns]

## Sheet: DN - Freq
		Got the data from the 2 mismatches - 3 gaps selection procedure																																					Frequencies
[truncated: 4,842 more rows]
[truncated: 20 more columns]

## Sheet: UPDN - RawCounts
	Dntags																																			UP tags
[truncated: 5,003 more rows]
[truncated: 48 more columns]

[truncated: 5 more sheets: UPDN - Freq_DbGlu_GrMal_DbMal, UP - CalculateLag, DN - CalculateLag, UPDN - Lags, ForCytoscape]
