# Supplementary material for: Transition between fermentation and respiration determines history-dependent behavior in fluctuating carbon sources
Source: eLife journal article supplement (doi:10.7554/elife.39234), 2018-10-09
Supplement: supp [file elife-39234-supp-v1.zip › elife_poa_e39234_Supplementary_File_2.csv]

gene_short_name	15A	15B	19A	19B	1A	1B	21A	21B	23A	23B	27A	27B	29A	29B	31A	31B	34A	34B	35A	35B	37A	37B	39A	39B	41A	41B	43A	43B	45A	45B	47A	47B	49A	49B	51A	51B	53A	53B	55A	55B	57A	57B	59A	59B	5A	5B	61A	61B	63A
AAC1	2.61244793031338	4.52908679987386	2.86712084025993	6.51303750599733	7.18417239707564	9.71978542549594	14.5123310431178	6.14851198887361	2.16649633442157	2.71565901994761	65.19801337954	69.8828839124105	2.71068330294371	2.80569172736637	9.43013875104252	5.9132909382283	1.16778927371045	0.926156000962572	48.4366883595323	38.5430999108049	78.4172301291607	73.8616425725554	3.07429141514944	3.54379337945168	6.14208176048296	4.99685240108159	10.5976427759668	26.9710040692792	105.831376164871	108.225511806545	78.2120286045865	85.8512704971001	10.8202645160981	21.1551176422111	45.8700943533276	38.5170602760457	93.5533347761977	99.4319424310153	18.5924883858223	21.6780331245141	19.0571872118548	11.899371548248	28.0993300069573	35.8545617319406	3.72093616736112	3.19654370079444	18.9620257798485	33.4112540413795	10.0758022053318
AAC3	1.58052729504086	3.55199391090547	2.31282043595635	10.1035821261912	1.03486678708566	4.08365874287113	1.21944162165707	7.43969663276755	12.5611765278205	6.84573718597353	0	1.32953007174362	7.7442914916123	10.3732736597973	17.8288937771232	20.2728248523775	16.4853008977697	13.5411888797835	2.83132850659799	2.98956996108939	3.10081090957778	2.79289664438987	12.8424975592936	11.9110762723232	17.3411327426939	20.1540656447599	9.61739847980182	10.3602728071898	3.71176915906125	0	3.58472214795083	4.43932857956746	12.5890289003495	3.55524412525636	12.7194339308684	9.28739414635934	0	5.95608224101776	5.92023088071725	10.088633120402	4.8040169544653	9.74882834885104	12.5927141773149	9.46876753371254	5.35993140827986	6.90681325786398	6.691996461429	10.1069023571748	14.6751988474953
AAD10	1.14428823405156	3.85740639885864	1.88376846809563	4.93757617363645	4.49541375203104	9.7565910577622	9.27008924733577	10.7725713567904	4.74479195012436	4.95626427374585	43.5784053641785	49.0910990065021	4.45245213342076	3.58438859781478	10.3264023305315	12.9506256361693	5.11510147490733	5.0709030714209	32.2852780381093	38.9596111925048	42.0930989563482	40.4406759907124	2.8855429931139	6.46763595176551	9.41612821362295	8.75483149720209	11.6048638225168	18.2831334883745	45.3480422564707	53.6419475056945	31.1437405424576	47.4070684751367	8.2028886014114	12.5481159199589	15.0688978999733	25.6733778682333	44.0623135365287	40.9654551314935	16.0733056603887	12.7821712556818	8.69516192304812	12.2158640111939	22.2227104289657	28.0444169573022	8.1491524911279	3.00028364136447	10.3820575781574	15.8542153653515	11.0333753269309
AAD14	6.95610237863495	4.33514167018398	4.93981699063662	6.27771773374735	2.00937320613655	9.19781727317533	9.4710106022577	4.81516504078333	4.66586066300084	7.44363985492014	11.9359678729083	22.7173813299935	4.5995248957331	8.05663083252627	6.4620025905333	4.63096520171943	5.03001119751609	5.07718929073404	19.2413036499175	12.3834923234204	19.8685258610823	27.4760141544982	4.47128851472841	4.62547310836366	11.5442828961703	6.26123378598027	15.7690056957949	19.1105243932115	27.3867702259474	16.9512269593658	11.1365941888114	12.6422707653929	13.0366563889844	13.1159270270008	8.98070303919235	13.1149314618118	11.0292360970469	9.25183723868999	19.1586779394406	13.0592534329323	13.0589638021521	13.3959422578974	7.33527809043608	10.6968650276532	9.57464973444601	3.93383771077949	14.8499675326928	10.46630134607	14.0280718064146
AAD15	0	0	0	0	1.634573299082	2.58006613446206	3.852217897618	0	0	0	0	4.20000167506198	0	1.48951208356894	0	7.53434621075067	0	1.47505989991733	6.70816033207749	3.14802172298241	0	0	1.3989484857553	2.50847496906477	0	0	0	4.09102909605736	0	0	2.83103623048461	0	2.65124984973026	0	0	2.66717038731015	3.20429265646589	0	0	0	0	0	4.97254690665969	0	1.69320393443973	0	3.02001864987249	10.6425888248002	3.5660841254954
AAD3	3.84439375295553	4.93695943764758	4.68798745128761	3.27673444771898	5.45384010421535	5.9597614160692	4.94351500998793	5.02667447721911	4.87081622896909	4.81037308720011	10.3835515792537	4.31185746525522	5.17090562172826	6.49902417018818	7.70954212772725	5.8012368875606	4.29621491744462	8.32888973116097	8.60850939126242	12.9274404050249	3.14261842892474	3.01924913299147	5.38577303514461	4.82866420714659	8.03427001354299	9.80436949371631	7.79761634393495	5.24998539065157	6.77122981437911	8.38219542646157	1.45322042655505	1.199780373666	7.48512449514248	3.603174649255	15.0003325676698	6.16097547329795	4.93445172850373	6.43880285600044	9.60010494517648	12.2696044799539	3.89501736104554	7.90417889265274	8.93373133496829	4.18752116605704	3.91116787066613	4.85328382492857	5.42579169781471	7.28402802034651	10.0679116379623
AAD4	2.89558860649872	0.464812324086213	3.1778764483947	3.70202117896999	7.10965310150246	4.1147886049374	6.70216563762452	6.81489808596707	4.00218447397059	3.76249108238606	10.9491242427129	19.4860266998096	5.42475420583229	5.61488227192969	7.62140445871264	10.9236934762351	2.69657693693233	2.99405316327619	8.42901202266014	10.0411324582489	27.6938646790458	10.2333459289582	5.67914110576784	4.72798266615796	3.40388186297206	4.61536760404942	9.78855394164992	13.049041950022	11.0501720775383	9.470147253103	9.03008888963582	8.13299728162316	10.762988714258	12.2124804040913	8.47357938288829	13.9211659839446	16.7247022514583	14.5489941855304	9.03843212892532	13.8620812798375	7.33424569060245	12.3647183078414	10.0932503196094	16.5585819005723	3.92782643611392	3.79604592508644	9.63285397597674	13.3728269349022	9.30654727439201
AAH1	79.0243899260541	81.3313076965148	77.8079535710807	71.8780256722379	23.9491842445387	28.7016749090855	85.7072038493801	112.655870443209	79.5782966570525	69.2380548196608	0.731799219314622	5.6978614068344	82.7772777704852	82.4454839102426	141.608917148776	167.6301572894	70.145131246306	64.836065995748	72.1970987088266	61.4981772909166	0.664444023836118	0.797952804668726	71.7391876029891	70.4438931561885	167.744802750375	180.518682040909	65.9461353469048	79.9204151150413	22.2700852832129	19.6916890394723	1.53627160236423	2.53669646577864	42.4419568816508	50.2800833805126	76.3147962617892	81.0516116072283	6.08587021250419	12.7626975025424	65.1214380446295	56.2066267443876	54.2153697285292	52.7065938002354	82.3004681582444	75.9942054399854	295.400923254359	271.530294499254	58.9974499118426	63.52775197222	48.3786768109048
AAP1	16.3442276481553	18.9829062504033	16.1790372977726	18.1305757859809	14.9506983211139	14.9044567131317	30.4129173592803	33.1872346184514	16.9428457975126	19.5718290575123	52.1949199970568	33.5630126296824	20.9215017477475	21.2245847283965	41.5733457020202	43.8868522642358	20.055834653836	19.4564627769915	22.1743912384623	23.6410053393662	44.561671604923	44.7377872472815	18.8565958186039	19.4419149215958	47.0916116949734	44.1345383706354	22.1007428173286	23.6329403129964	41.205705879453	40.178394261796	33.2536487579714	37.5808047987518	22.7181903410726	23.2482980136933	18.9911850766464	18.7459298935532	56.7653856300129	44.9862348493382	17.7061613007681	19.944818753684	18.9946007235047	18.4746703664594	20.5863936575875	25.3954140444266	12.5525835024731	11.4837529086008	20.0628136427606	24.9334754553864	21.287142494399
AAR2	3.95120715364027	5.49697063819351	3.37275670754518	2.52582612685308	2.58709247455654	7.48651464185557	9.14554663776913	4.133055319048	6.3714243049668	4.56369307744778	17.7867106980828	11.0791453230894	4.93493603733326	4.32207507228598	7.92374033677362	8.94365486050616	4.90621121161446	5.05835987102398	11.2070301700175	16.6082564084596	14.8576207730705	20.9461065524307	4.42832633192877	3.63938459671994	9.28962317265869	6.71784304864889	3.56189259834825	4.3166709478367	17.0118056911369	16.2729335466373	14.9359002376237	14.1807692788255	6.29435416341586	9.62853001510052	5.78140170997979	16.182104113171	19.4409215467436	17.3713859361479	4.93340638924451	4.20348685743367	6.00483366802289	8.74866599330159	11.8052941446796	11.4769362294224	5.35977950646726	4.22070764637833	9.55977395212572	7.48641741931451	6.58485437421475
AAT1	17.4505498525667	21.247172117307	16.9836790972078	22.7316527614825	17.7856465207502	20.6722844308052	3.04840779678611	4.64951275506548	24.5746790037722	19.1097979637313	22.4104713010988	21.6035301068451	23.9146566402118	20.9220636427974	2.97129564099972	5.21694432769216	25.7566759184984	25.9717928554257	28.3114888948464	27.4026709953517	19.8633323804181	18.6181568390116	24.6316954814054	24.3168982622642	9.28932931658212	4.4084253800051	26.0454381746043	33.9926218310382	26.0967130162442	33.0233814065424	14.5620298263979	20.3456399921721	34.0931004718185	28.3290775595859	39.0230495709405	36.9361076721908	31.6960206566247	34.1212760498302	32.0660261162883	34.6775205446591	28.0215882379701	31.4004387250767	25.5773129131989	30.6638757635171	27.8028419287378	29.3521529812053	39.432647292931	35.0912737136785	32.4527979061485
AAT2	99.0589995853411	109.633117216266	96.8564216643163	99.4761084857382	117.809229814242	127.040822302423	240.956932097342	186.512568101728	133.306665994835	127.936325195178	206.64902847688	206.350838802619	120.226586278662	148.297194254205	296.624684580668	255.205978067831	155.787177474231	153.243407739724	215.363313794914	197.590511759273	188.689044875216	169.315494813053	132.013783376771	138.989179934683	338.758754352614	312.113061852004	217.726414294787	250.581836754054	184.626735269518	217.556503773811	151.346705860897	176.046219829958	231.252652797106	224.242186670607	224.530001328332	247.650203066304	212.218873108243	214.47517205842	226.677972985572	232.802720680472	209.120444489871	206.630436497065	214.172124760478	260.72614802522	38.4795139965833	38.4084788389618	250.998409509211	269.503179459173	207.622941183501
ABD1	15.0762412512123	13.5305932002872	19.1783364400846	20.3702779040397	21.8739355629082	21.5127038325611	45.2058733331866	38.7084027218097	12.7868961994859	19.5898925822538	76.6277361908044	60.5280146728879	20.1465329074186	17.786104864182	40.1971961880875	41.10556963279	17.9968454146299	18.8282794191178	39.1298875039575	49.9042015440813	80.162610595243	83.555044146704	14.1126149487606	16.0096024439538	45.1125399952736	33.4242662444893	31.9691586239794	36.216815090264	45.2628021543877	47.0663656031505	83.9299289106586	68.3303688573893	28.3833121180414	27.1685873015046	27.0729706290657	32.94665159021	54.0948030827597	67.7888574622919	32.7279484692245	22.9646836575128	28.1193825560961	29.2630127530896	31.7358184989848	39.7482139575487	13.9437003022075	14.3742889257835	32.9529563022516	40.9000030047676	33.7721309253632
ABF1	16.9460064976798	15.9547433246183	16.0904594001783	18.2575485202355	24.310515265936	25.0897711270718	11.4585665749524	6.27376728595543	19.1456959281888	19.6278542084686	24.3765738843344	13.4540726817478	16.79303037376	14.9959132422762	14.1756875529095	18.9633088676651	23.1933053970185	18.9005270838749	41.1863238346388	37.4556351100714	11.2065420389734	12.7853604931537	20.3260239368795	19.9453226265389	19.6969769085718	17.845364933621	50.9782590085805	40.2510626894361	29.5121065284606	34.4576506216716	9.06882208442752	6.15020219074483	44.5876622938705	47.540943104482	37.6109087113158	37.5320493564673	26.3943629950863	14.350494384905	48.1415350631976	34.9418577010339	40.2220154400058	34.6908689863933	26.7376562981135	31.4208693398024	26.925862130696	23.4639831646907	38.3511696261021	47.485250206199	40.7979524212339
ABF2	131.915660685272	115.503950080522	137.597146002905	128.582166030248	152.045239539835	163.09412543708	363.373959046869	449.026486998505	145.788385211521	180.381793584365	480.560002396452	423.69208634432	153.656164264023	138.552010072964	405.832992722367	434.318297413815	154.729546494196	137.207700845338	350.073155184743	466.042786065124	380.184424123634	340.986638305625	126.462234936823	148.709448373762	356.282861478987	350.325921412807	302.945701664219	340.342485870594	382.123863698193	356.560176739755	246.647880059046	222.006093860919	317.820325533532	286.922396185864	279.95665714603	337.200259477286	342.137034422228	357.428615615378	316.483380741551	351.425782212931	250.184213037237	350.709012989127	355.046821206386	313.503906275276	145.298387630696	126.726732361165	300.699760328706	332.309290107171	270.975150650215
ABM1	5.81828169969765	0	2.47458393349374	0.0581129294707297	2.21449076910062	3.16215690968686	11.9329552394234	0	0	1.35253181685818	6.31074063924948	11.3801844981101	0	0	0.00303486766631584	13.5853650397505	0	0	0.104284498560401	0	12.1473657921571	6.60725449178083	0.164523771451408	0	0	0	0	6.27340047384309	22.8223598463472	13.9025583383543	7.670874026926	0	7.18373195952666	0	0	3.61343318712789	23.5475626397382	0	4.22287953566502	0	4.89304447609588	4.26343470923661	0	8.7848629923789	0	5.91189571693573	0.00284914475176886	0.144483511559423	0
ABP1	23.600404835832	21.8028941709754	19.5580353265876	22.6299938122523	34.7684397679732	39.3863702265911	81.3816917106678	66.3134632154464	37.1965420911769	35.464343919222	162.740818210302	172.595793678551	31.0264300832945	34.7001525605556	89.1023576542945	82.3104314659038	41.4451550888286	36.4977893321032	98.3595287148771	92.9247207041464	159.101661876856	147.238553238354	33.1975942455661	31.9413594953221	83.2298360877501	92.5850633757582	96.2263357195573	91.7544761236934	122.15941334927	139.670944774667	135.592704501238	145.427425151387	85.1656978854143	84.5053797104329	86.6826200269897	89.1506038522893	172.015896126467	160.175568390909	73.066489237732	81.4705121678735	60.3877570365246	70.6137079711236	82.7444665912439	94.4331688761329	27.6853711936652	14.5227046151811	82.1542157176563	84.1846637943973	60.3723894709336
ABP140	38.5145375586652	42.3015849278843	38.8088021889527	39.3065286245483	36.0570407051033	31.9485050435926	117.298173308273	104.42867885514	47.3967013738573	48.5821320350791	47.4504473288088	42.6293938376081	38.1713876140725	46.5644805457125	105.69281702532	131.022664461394	42.2859880074284	41.1221076882268	74.1387597040808	60.4956908978564	48.717136234957	48.9539037592267	42.5975191582987	45.1503276996635	123.912250848637	127.518452009213	74.0076430708427	76.4028359734169	45.621315618423	50.0909991600069	50.5728415045806	51.5588590866551	78.2178011771211	88.5346674628032	76.6220412434457	90.9597452572569	50.3024226327835	41.589570748282	79.3039933774084	88.7763920068658	61.6132332953048	83.6753183367977	85.4638097790316	71.7601434071105	53.3904490904821	49.9998202411994	84.1929883538504	78.7351060244889	69.0123094485802
ABZ1	11.5892416316318	10.8239144481081	8.47937911717202	10.2708348214616	12.2445579392906	13.3384943401474	21.9474832738647	7.85216466612746	11.8316919664673	13.2336204682626	36.1395082750251	34.1208481991548	12.2983716233791	14.143824652878	24.561500863846	19.873103681014	13.9324741071465	12.7615514938071	34.2080792364623	35.2065727860293	31.2630842655306	36.3036375538618	12.1030832736418	12.5713840658629	15.6878494798869	20.8235673910376	20.6572462848506	24.1713682111916	39.2785035425474	46.7090266106578	30.1680543682279	33.7844514491901	24.0563176331304	24.8839396068616	25.0505757203971	30.1102330316249	37.8643101698451	40.3645146183313	26.6381746907509	27.1802484560061	19.7476075968225	23.7444377750191	28.8550106290638	30.6982845624391	8.21763489163896	8.74764379653781	25.4905790346501	23.5801562880246	20.6935406396146
ABZ2	11.9435994700486	12.6934778811795	9.03998747606857	12.6372572930668	19.011176584426	17.8770544813433	30.5047658021532	31.9871484682398	9.81945632609118	11.4165710005457	64.7403616732291	42.6127635725715	13.8884401857368	16.955423511581	27.87476701857	30.7635162534107	16.5690880174146	21.5361487933845	45.3733783638127	60.7629507630336	60.6000054761435	60.4043966673194	14.5397810404322	15.518737746631	43.573174938151	37.8120949473288	30.9081443345827	30.3710940571902	47.8764213538037	57.4708925740811	32.926868703721	39.330699673626	32.1479672238784	32.656061829743	46.1000762587146	29.7008857765239	45.9903828621494	45.7844660272844	30.8536126261928	34.1752582538945	19.4030771826766	29.311284149958	39.3763602335415	28.2622009242727	14.6650566932469	10.4385619757771	30.6408003651551	32.4814228914706	27.3564462948792
ACA1	6.89090843567022	6.63695018740359	6.24745153553822	6.60755408118782	5.29656805880538	4.87681867030865	11.7890177852079	4.93594546818901	10.2490518302286	7.00746218092557	22.8199153136269	10.58506956221	8.54895718439909	9.65302372497541	20.2778553625071	21.0229714202463	6.36151262483177	10.6215177720079	14.4910895980374	21.5346623715036	26.4505206771714	22.235654177332	9.82162501064922	6.77358971836198	33.1066092028086	21.203213460319	17.6229761885853	22.0938146606769	26.3850758471346	25.4767032378896	14.7795162147244	17.251130545466	21.0000765726276	17.1852584226008	21.0422147657746	23.0467024421485	20.1890977225115	37.258110293418	19.6392147295725	21.9925910865522	12.7490317613412	14.4995733032561	32.2253944899606	21.5387216149021	5.18172526513852	4.7133083731161	20.6590292826021	17.8814076368917	15.407061535614
ACB1	782.475427525971	758.909033365527	1225.08029972146	1138.56761234348	596.528137271078	627.719913511155	1633.81709540022	1648.41882714114	998.318822088198	924.307738601395	1374.46562667119	1187.54526176147	894.226750152756	901.08353942272	1493.72862434805	1709.21713748719	911.126432125879	1023.28247508502	2771.56390575116	2163.15340588586	1296.26804292888	1392.35530532921	883.093344686501	940.194040487481	1530.91179731983	1580.38406314652	1531.60633858667	2111.71823748775	1628.7757540785	1288.51182192616	1070.402347075	1045.10229961801	1412.11031706533	1236.99410924761	1849.47359243006	2016.88727467447	1085.1086222247	1206.28093730279	1578.2031182372	1580.45851636857	1455.2694657441	1417.53154416836	1978.18967621446	2118.85824231124	862.868119651788	755.607362698959	1360.29662789955	1481.2640700699	1348.31703324012
ACC1	22.0044492127514	24.5665176555221	31.9646714555779	27.9276920183035	20.7515719880529	19.4991664380918	47.5543119509548	45.6071327699666	32.0675311292321	28.3142927898675	42.6592453360541	41.38984291307	27.0006660899884	29.0962904118696	47.4049545410838	55.3564026098914	29.547857974796	27.9345259543648	127.351526979815	116.474030705864	17.0046922376699	16.7084738793182	26.7875943226326	30.0866255209644	61.2028743480387	58.6110321655777	51.9716978737456	56.3849783825549	71.3460886227605	72.2851234702051	6.1556754844155	6.72152617820482	33.4727372860295	43.916965699491	56.6217484301711	67.3474570821577	51.8049709223732	46.0798982178597	44.2723436044601	37.0700592507474	37.9651044769631	35.1428361740285	62.6055456249513	67.2324200730905	58.7870141525658	68.3053215713042	43.4241501722741	52.8753820356968	33.6420119513528
ACE2	5.3952246021855	5.54283927950692	3.75010121662971	5.69073068280461	5.47550846480117	7.80632691781833	1.66505664874536	1.26979558791897	5.965693679644	7.16630830162192	18.6524566014959	15.4306895038507	6.22014828112291	4.02384118867985	5.27455691857658	2.84951599128508	8.84302114606476	7.8102327804827	12.564396695562	14.6273166745457	7.4093657476198	9.21596537721299	6.80254805415623	5.96335642342271	6.76515459484118	6.87971937238283	17.8738866768189	21.6614049067233	13.303861250529	15.6848048220926	3.05917174523449	4.04104825516811	14.0379677717137	13.9564558370348	13.4202800664155	12.9694427775906	18.6975422262434	20.670311556693	15.156903714329	12.0533729981183	11.205841171813	9.21548188236483	9.67186400839659	9.4027975606068	7.68451016337212	8.64483973990429	11.7481739364235	15.7169385996564	13.8724215698329
ACF2	9.05595953815596	7.01197300615087	8.37978451014777	6.81064483701103	6.97585293523128	8.39582515231434	11.5080696070086	7.10453299940931	7.73100257506931	7.22953063821749	19.5677600141177	13.4432159426862	8.29104015918481	8.58165482424466	18.0272035324061	15.2732823987812	9.92185805669938	8.97052267454192	16.2226584430496	16.7934957800811	20.1182457230202	20.7090578112948	7.01508807219821	8.56431498118612	12.9418134203341	17.3214982288225	15.1267987787107	16.5863110202758	12.5102167740544	18.196668211907	21.7475879320191	22.1941731976033	11.3146957383263	14.9783164422751	10.1328152415475	13.090072564046	19.1449156029381	16.0595407224719	15.2978589694812	13.3177875372488	11.3340614307175	15.4177792219485	15.3854289894417	13.3456899639826	7.04540860385231	8.84593330748623	14.1773645978479	14.7612898641528	13.6970700440228
ACF4	9.92725276454111	14.0905034797301	10.3216350249357	14.0281021374388	7.18417239707564	11.3397544894138	30.2340230064953	36.8910308793914	13.5406055508191	14.4835034833509	43.1831022751599	35.6006280088252	12.6498627941293	9.81993687102454	33.0055083914766	30.7492029624367	9.92621178826099	12.5031147844635	24.5693459554269	40.5197260199638	50.7404915708766	40.6238725008808	7.46612497717711	12.2063712947759	28.2535271222088	28.9818122079404	27.5538925852368	28.2552840987981	23.927093741623	28.4804223052189	42.6610610180587	33.7535178300978	18.3112661923996	14.1033932996745	21.7883004657163	34.3304432063798	36.2142585807764	31.5031610821912	26.4209306398247	24.1793654981624	15.0869535497539	22.3113019771239	21.8550279069963	16.2198925332515	10.0996730327078	10.9595503620673	21.8062789708968	12.2507855662487	17.912492579798
ACH1	4.95812155482597	4.2447920527234	4.23225994305309	6.3389957696786	8.11593804021587	8.11331079480867	45.2671056284351	42.7871437969904	6.56740977727387	6.44252544463236	236.585363546716	198.805718933379	8.81246485658122	6.90265416721923	28.5861053854881	25.5630872614579	8.00343215076825	8.54458014917515	105.47236640332	112.539388697203	145.098430500201	146.995569004482	7.64064069083588	6.01994057439174	14.2474159685436	20.0207213033653	40.2263412719965	49.4275746222719	114.982985101651	163.959638612209	110.109865416186	122.241180853735	26.7666598679681	38.1054312037046	62.2696341223869	69.3050189332453	199.403941014838	186.323802702728	46.4296916010564	56.2635725823428	22.6053019667615	21.5642496416758	71.5997526085523	87.3105474992665	2.80236058963741	2.4074084757113	30.9895040993989	32.8797188595436	27.7398173005769
ACK1	10.1924718948755	10.0289336895029	8.98414875125613	8.52569793903243	8.02257328266154	11.1086116438203	7.89481004892507	7.49240977647554	11.9970849897139	9.43141785570243	18.7545926353903	17.2152110758519	9.75078022366351	9.9632847926961	10.7699587919	12.2717952908112	12.3597404106517	10.8682299513768	16.6078174064314	14.7676943487153	15.6360864283465	11.8800123667966	7.63572921818638	9.4794201940993	11.7268654717471	14.9329079671334	17.49482326943	13.9193013180911	18.7513443061879	16.243321285275	13.1512207468531	10.8576504084409	14.4894421425617	15.7284562816992	15.9067052635566	18.9494430320189	15.0318120799302	20.1372169990745	14.4797236022381	13.1535665874124	14.1716906193727	21.2802879027064	12.3111225981897	15.6310274675612	17.4313406023932	10.68480100021	20.9978112033888	15.9920039334041	16.2634142579636
ACM1	20.4824014523124	12.8658258948275	17.5924411376451	20.4941211175136	18.3673465989617	14.4958302167435	10.3063280900037	12.5756154054749	18.4631382457113	12.3430322499874	27.4204719467021	24.7209203547406	13.0904168457831	12.7522391683892	10.0456000875139	18.1417960308137	26.8704907677335	17.3642043219723	40.6801029368629	45.4803328649939	10.4828552392747	17.310060799311	20.9595775028978	13.422452443907	27.2186149965349	23.8469820666228	41.5446229472423	37.2137877227556	51.7616208621824	36.8924291786573	1.51484323801048	3.75197358475116	49.6525101588302	30.0477418653426	27.363723784501	41.3876827234486	25.7185393862716	31.8812847294738	40.0288688480442	39.7907686858516	32.4814967096715	43.0982771913991	34.5895389313487	30.5556660234587	9.06005702731562	7.78319943898398	38.7831419130697	11.3893653314728	38.1631562789028
ACO1	63.3030470801817	59.9425937322506	47.0317984896928	31.3731934455415	81.3831212545286	81.595567387341	37.8653402374051	26.3656858087455	40.1840816188865	46.2107299275973	186.154973695958	132.826240625782	43.6659972305326	49.3341856721888	56.9657974490173	57.5564455162568	66.7684718222283	67.9250849279967	156.004647624242	176.579461809815	94.1918093752197	103.062411991197	68.6053511834063	61.5085470101244	95.3185853177956	111.557612315952	151.120016304798	216.362159890173	209.840314020035	235.338467536237	55.6551971415899	60.9327435302831	154.096484252973	136.794180729474	213.479348182942	213.440206411261	250.945484635431	213.088696293646	159.521249017585	148.404650100389	140.253273110364	129.84323661775	184.353566868925	186.521200129181	7.05533285560845	4.19607392970529	175.207490174904	193.682503526594	143.259532892109
ACO2	9.10562641178149	11.1312444370183	9.60896942257621	12.0893640138117	11.1787568883288	12.215705370942	13.3751928300742	8.24250467420808	11.9804183342076	12.2868095292292	4.25662366255159	1.76760263066581	16.2010030010421	10.5001057831871	22.518218394469	19.4216845041392	16.8291864566941	15.6749656204989	14.5864064128522	8.28043407968272	1.54593844314615	1.54713564402498	10.8920355848035	11.0849814161779	31.2888155131341	29.4741230279977	23.4414071824977	29.269581503327	7.40215438499881	11.4540359739651	1.19146610009837	0.983674119252911	32.0792042043185	28.0645568955952	18.0633504151292	15.9956318407414	7.41700421156552	10.558106992653	24.5966644829725	19.0014160382266	22.6202102089303	22.4324526894817	25.636021989817	18.5968286325813	18.3493845237729	13.6207769011362	22.8779415104347	29.8601418166096	23.6378279530371
ACP1	167.711850269959	115.379564821075	217.528037250029	309.100748461435	342.26861443078	342.72095864242	282.319670785155	302.446999025092	259.652926905234	269.809506456215	843.602502735572	824.484611511849	216.58221706346	224.173476238146	402.938926803328	414.130051099011	292.087407885344	272.189202906944	1003.73036555469	881.643276709588	823.648937054751	758.21591736355	245.329115073099	215.027085749545	353.338913351863	308.288313039947	649.41852362278	679.952955775928	1074.16694248408	935.554912953513	548.339933605411	679.062789182216	690.472614123454	576.899850961705	774.426790345247	729.520085784383	1144.82280800748	1079.33510880134	705.712672532094	702.093371269087	628.926230084689	700.664572435829	787.420032635278	725.978196843166	161.760999740241	154.192590384378	715.368084568488	826.395893437199	658.043163581656
ACS1	0.391420385166976	2.26197748089316	0.644370888336746	0.750650892543622	3.84429127850472	4.39927210720634	5.43595935126291	3.22430371167848	1.82590686149194	0.339072116379822	151.286670167521	114.089266165507	1.35380283973219	2.10187990327331	2.20768016389082	3.10095947559266	1.74969363328037	0.693829030440584	39.4416429403525	54.4173622555972	32.5407423360794	35.2750042971383	0.16450713581824	1.76988024657252	0.920264177399337	1.87169804146241	11.1149019323573	16.8377271660177	99.2763876788249	138.25739086345	12.3177064155216	11.5437780370804	6.54717981109075	5.94313020299783	37.7998869665773	23.8367511954657	179.358415835405	158.934860669234	12.8289111767161	13.4292929113782	5.35374666412315	5.29290619771072	30.4064141722742	36.4533934842152	0.597328561056501	1.19733848308391	10.2988957115999	11.2634619515022	6.2902396868262
ACS2	67.7298663879687	63.4549004194014	49.5552024379589	66.3226215251266	76.3975686632873	76.6802345621039	125.890551269735	95.1607721634912	68.5085366277745	63.8277469169807	71.8436046598044	70.4407822376001	66.1951974521156	69.6175425375343	136.13400182042	146.339387197817	73.6257471178752	74.2174442693051	113.333608730698	100.548128110433	65.8354049485813	61.2923711118143	74.8732880802413	73.1606073627533	179.023488729337	180.583061898495	154.86150461561	165.478772256539	58.9243762032532	71.6005889082209	53.0669790089972	58.2240561423516	131.762661559697	151.659621729284	141.896350554091	148.999469094883	75.4745202564864	67.2890813145246	151.450610492811	148.694260361989	126.326255811365	139.936156076017	126.935854393478	140.842926304992	49.0696020312503	46.9974020048643	136.682048696304	150.932221265232	150.402255405187
ACT1	486.456417359298	506.881285871683	478.915904696011	484.560864359796	616.460937974027	701.942192080528	1365.40629892039	1199.97119943101	574.487433692311	556.173104367801	1236.05812397467	1246.25951069818	542.021526472968	585.266373011793	1231.76945013473	1301.80882803408	579.869656452348	582.136070449261	1018.13565804492	972.155448711478	1373.57052952975	1373.90581540877	546.232335348275	579.444767057976	1293.29977380369	1383.51338500489	1141.55457960531	1327.95264599237	934.900382635848	1100.03575392378	1537.64778176575	1438.40330920219	1342.56189238688	1358.09982195321	1098.30479536536	1024.3148525324	1104.13614811956	1051.16896111869	1198.61540826059	1155.56663743901	1224.04169208092	1159.29531159529	999.608885880713	1150.29208051601	562.981029532158	467.493473479275	1152.37595858095	1342.28698320901	1195.37572392725
ADA2	9.6462597116189	10.2862068113251	9.07428142639093	10.2406500887706	7.10547102949554	8.81221239571063	17.5429602323091	12.16228524126	12.142322987697	6.56555498267703	9.49113075194747	17.387977565081	13.1070504043359	12.0248247148005	13.2130020420711	24.1738972934212	16.9399548651324	10.0761078414621	20.3658863965675	14.9876892112198	21.2904885015155	20.0894171008973	12.7416011238435	11.1639517421824	17.0094182082569	15.1558476103356	18.8667913489071	24.5584260874913	15.1698434563143	17.2766298583265	31.0592681486483	30.9646524971966	19.208284324017	13.3677090493001	22.6837727422171	22.6362557763354	14.5923002160353	25.3159458076737	17.421000942846	13.1941879518204	16.7541450843653	15.6919817437249	18.5276895175216	15.7607723697036	12.9682121786986	11.1405738298101	24.3805628183612	22.030134414557	14.7635530986773
ADD37	24.1335091115861	11.1571811604892	27.5457715743391	26.8437168769332	27.4947710299496	35.1680567315263	24.5783939504833	9.08792661219758	26.0181442608913	30.9408421843243	34.4168224069299	43.8501808027276	20.8675879839191	33.6945303481065	37.0238758983175	19.6656110083618	29.1275007499391	35.0785656788013	95.9760096207954	85.8195645005667	18.4654205016324	20.4698450884323	27.5887452913733	24.0073165853919	38.5832538778942	35.0821451225744	52.8661507617558	59.3228576434517	57.8096031919083	42.0960205682196	3.28416957094892	8.13424460497365	44.5962643499304	45.6002387355053	50.8493833372989	69.6165186349784	59.4746761343561	21.826849988966	37.9671985686028	60.0778590427119	29.3414833638192	46.7183171430715	51.9159594789511	41.0084065553114	21.6063619215349	13.4991295233823	56.0545120170538	47.3264208745559	43.4370707851813
ADD66	13.9090944063371	24.3573082090035	20.1221752516119	21.2182266071773	17.3863109199901	28.9133579711362	59.9984137032789	50.5914807275884	33.4246730775994	18.0733467831678	50.2041993515295	51.0557294866353	25.1469791495681	31.686738703337	44.2171115672148	64.3982986948105	31.7940872883729	30.2586435682363	42.4713645358766	50.2264293132793	55.8165006486435	45.8050012067877	23.9144092284433	23.3464744484782	50.5388373292398	65.3011723664168	43.6001979072657	38.8524273386884	45.6562985504917	49.6259671452506	43.0180669762551	29.3005235759024	38.2718831336842	37.3313094866616	43.016161234194	28.3696215610386	45.0380072225589	48.8414973053416	37.8908546906658	42.3737234272356	36.5116446280357	34.196979139956	32.1123927667609	46.4844482527266	19.9395686489115	17.6820033140735	45.8896141302085	36.3860768114876	27.0935949105322
ADE1	50.7885747873378	51.4647164747518	41.8048585095373	42.1054306775859	57.6754778063392	71.7631642561932	156.741745939879	136.965497324242	47.7128694899396	57.7448549602504	96.0239410919805	84.1108600976721	59.4687081498214	62.5002117658206	217.229307188407	222.736828004324	64.4435199338843	67.0514466346167	121.545703152809	114.078736502627	84.0725596095911	75.7239034184117	64.0366253886959	53.8241268258409	222.646913056582	212.503278106435	109.452956304323	98.8345723821924	238.547258803893	230.703418285789	26.0979662560849	29.7193747569981	125.573989799303	118.706417235741	123.081548947613	124.632252230878	228.162420803969	216.313058537307	99.083998115644	123.258995083324	116.582453759916	118.981122944167	148.583427860228	149.540640115274	29.6028784079747	34.2160852454129	134.400565031992	119.534852634095	122.427429868815
ADE12	66.3265056694738	64.5476236621318	49.6658137544131	57.3055635854576	56.3204864760993	76.8490597675424	126.334785568597	114.63795033279	63.0259821594923	55.3613164220829	121.482102794025	113.330549545536	57.3506278901745	63.6891190567618	129.373897237785	145.439551632383	67.9448678605089	59.3971705695587	82.1502816829571	103.240446189656	127.58341696012	115.982619459942	60.6881100839495	63.2617557434293	132.386080576719	147.347448145781	106.50314213352	90.0107644261559	118.64818631188	139.343616414766	99.8961121125866	83.4449342893282	123.269066206595	132.876771482393	116.761564858023	137.849612124024	144.991612762558	146.452548333463	121.632983188581	132.853555266801	107.624381704533	106.210190337896	123.855541657376	114.013555228247	35.496415566928	34.1169615249357	97.7885399442946	128.860460258923	102.886967491356
ADE13	84.6951027537173	86.8557288747243	64.5314860414919	70.9878789147028	76.5996150171213	95.639623670972	173.471646577586	162.048578743793	78.3224835444873	82.604780885863	123.923983176433	108.405480866022	74.0237637952975	83.4349931487583	211.697940047252	242.73940190824	72.5189515501375	85.0554711297494	130.573259269504	133.116611242731	125.517771853078	118.437193018392	85.5325040179985	75.9960020450087	249.264886232604	229.011834315373	129.149723436855	136.296878933865	214.104782710947	201.273079784808	86.0272263185658	65.0344416360456	154.333708656117	159.332161005378	146.437250650633	166.001244972223	225.826618780601	215.838808590635	149.493541240933	159.462447148656	152.328480454435	151.777864292572	172.037615640562	154.309818296902	70.6685207639681	50.8570932098809	156.450995294251	178.583765307995	146.225280538441
ADE16	33.8359279372696	40.1880447283108	33.0632328434948	41.4245075270813	45.3833226600199	56.3021924833502	80.8658811994111	60.795004666204	55.2851235555854	44.3930877504749	161.416713554403	177.657042264214	48.4343762705765	43.7740587384648	132.786955629327	125.963466613248	56.3994825724292	46.1151201166234	119.473520388524	122.827383737859	164.653121744002	177.058221430801	45.1208542463956	46.6793934492591	112.682051122309	130.344337576295	95.5617995318574	93.4337373040957	159.490759502112	176.667680820141	138.089344150021	140.161724894944	100.723664991596	116.877037518067	94.4620177794478	101.238013846992	190.263266810443	195.873288881036	92.8580612302005	82.2883628691726	100.874417215659	97.5150426324266	109.724732112694	116.925251523238	46.5037272468528	41.685695508303	97.5554306711348	110.607313509625	93.302692348914
ADE17	15.6533100905484	19.2514825357615	9.7790176632938	11.7768157448773	16.7928749022091	23.146485867833	32.8870530416539	18.7038467923301	13.9798632854742	12.7253862651035	56.5885692084165	37.6793483826811	18.7407619597087	19.3976324428614	51.0706803205553	59.961178492846	23.1446443020816	21.9841077054619	46.9149123029065	53.2948954711375	34.3716297516691	36.1713873563423	21.8619153705249	21.5967811321073	77.5682090124624	62.6445277885958	28.3305024804764	36.1097917544707	155.244151815249	151.747568584493	7.37361927619899	7.10225915770943	38.7466525134896	41.0339341577469	35.4129210364762	37.4356066056758	183.143267887531	146.10928810294	41.9454527101075	34.970818727194	28.912894842099	29.1366676186775	47.4881056101224	57.4467356362027	3.67503650298901	3.57804734675975	30.5893242899607	37.472405748966	36.1203537228478
ADE2	24.3329665364838	20.5369146246701	14.3161916931508	15.3945922434773	25.130253655191	29.5554149960045	63.2890723453696	44.2802723302142	21.3235460756056	21.2959642698396	89.4361990442553	79.7650266871686	21.9076697316981	18.634366622271	62.8199414875448	72.6804893357209	21.5860380202459	26.012843329452	49.8809895679355	64.5312101025731	101.875069400726	119.241575940191	19.8208552096884	20.606249133459	70.184095568335	74.8513389679061	46.3018259745272	50.5636775912948	117.970699951394	130.722863017285	70.8347061547253	83.4943282940077	39.9616261458072	58.4022413229125	53.4058423170234	61.9102603275926	154.068995126615	128.564727044622	45.1027622940553	53.6412980957039	38.1237037953813	49.2753894543558	57.7114345157393	59.4305215450902	13.7814691663573	17.3203244122036	48.2511124191753	48.6586424113987	41.388036188656
ADE3	40.7038790208167	45.1606797758688	30.3077228195366	34.2031383256777	39.8358041428497	46.9357237528037	100.206697352468	65.3326867332161	46.8169675427921	45.9753396208085	87.6409445277858	75.497637923064	47.5077680503625	43.6379616550633	84.69228740768	97.0175881741298	52.3993806356172	48.5684999425107	61.4506068174244	52.506611358768	96.2933142297057	101.917356517583	45.216179065023	45.5249305281464	98.4040741218019	111.418610350709	77.0172868662616	88.3876757148163	67.6396223342118	88.122371682629	114.25691948904	130.891118824736	96.0026856533556	99.0008462472075	70.0806600347214	83.9015284862218	119.628906764957	101.3564836452	76.7718663436666	86.9882926950732	71.2590535035688	78.4111126326598	72.624953234351	83.4253194968428	15.3644632723664	13.0734127723922	93.6965920394687	107.916370447201	66.8763278358178
ADE4	29.6816346159766	26.6636077153066	20.6728108231414	22.1669004509251	24.106090358648	25.2191265632114	15.193690406913	10.7472821850426	26.9226840760088	25.9592607516828	24.9756348257413	15.8451282597058	23.4439075596377	23.7547820066202	28.9747579063443	33.5925432190847	30.9375572423741	26.0537768505608	44.8632058895432	38.8681623476989	13.8581230538113	11.0951052805368	28.0680099612034	26.2400000651536	30.195083196133	44.2172567331098	52.6780613793691	46.3020793147055	50.2684409236717	55.3828297768124	6.79667482819702	2.40486935551169	44.5554446553354	45.7411391896913	47.6060849785439	41.1639526435568	58.2454819720305	55.3886320153077	42.7615500373191	59.2063165513408	40.3375308761815	51.9986832713783	36.6666743061002	56.889728372273	53.7160253088082	38.4131405980932	45.5738764213222	42.584173962856	51.9797407764586
ADE6	30.0637634448649	28.3901154848758	24.6116842442981	26.4802886572421	23.7562077593697	24.7454024575907	30.5999390755373	38.2594378155866	27.0028888949484	28.4184402997057	21.5830987219367	16.0634553995635	27.7736145479973	25.9424634960888	45.9540519008484	58.5188391716119	28.0159368095386	28.9889149816696	35.3922948647427	34.0824421748784	20.0288436630147	17.9967231151835	26.1760895720032	27.8225563988163	58.4802977985988	63.8721346184793	57.4033196606537	60.1796356189457	41.7409816939059	47.4012630164044	5.99683936003712	7.15145359065289	49.2961926938378	61.6234561088624	39.7623578080515	48.6505731220343	48.2667571785907	36.5343081439296	52.2708795778489	46.4123764891482	52.8333100457121	55.0592997084736	38.914048337324	41.4405336093602	37.3607571468297	36.7172416972557	54.3758051918046	55.524357304797	50.9886453081368
ADE8	50.7542621857774	44.7411002901471	44.3729067843241	47.8422965538346	64.2107494556422	60.678037559476	109.512066745784	85.0340189248241	50.8297001824569	48.4376238371464	147.772650675384	154.133689259258	46.1173021906387	46.9638521139183	104.801424690968	130.460642581538	41.3376445747561	59.4693889960864	98.2403826963585	97.6290366155191	144.2977688978	164.171401108695	54.2316360112143	51.8630866434003	117.305386727042	156.313318767056	85.4965335763582	109.957312545766	206.063019611981	221.32575955304	117.064325468128	117.186527708195	90.4450094337567	121.906585570201	92.5146267927718	96.5026075969198	289.840652326884	235.026450908952	101.501003428687	109.819777325902	101.973314059798	93.0593828258345	97.6678781131373	122.281159052002	77.0159911728893	58.6434577379593	107.707686247285	124.688133705879	114.280544705785
ADF1	87.3551933610174	84.136157451637	65.9116842753204	49.7343947226014	45.5785731468427	46.5514509438553	18.9557361303742	25.6994228732028	36.7879044910565	68.5781716814447	26.5434775814064	34.4451069895096	35.4065082473049	43.9769095710189	73.904983341041	55.6116396167718	94.5713423402415	79.8420024519523	113.697632747076	77.4529811722057	12.050235338306	14.4714732264654	68.8385141054227	76.1183385543105	57.7632889717631	93.9863007306471	88.5916482640857	100.654560379826	52.8898204213987	59.5209109189719	13.9307888456453	0	69.5788791626339	64.47580413975	107.846377292861	91.8710345807585	42.0465683562944	36.0052440391156	102.253425775455	91.4805057977659	112.014812141976	58.2850882731143	106.030241172854	98.1255889535623	124.976963141892	116.907104784585	64.3963033526903	69.8257643171784	87.7385858936452
ADH1	2500.89494725483	2790.09004380843	1977.77920263864	2181.45769823912	2796.05492997196	3052.81145930336	7748.70221923696	6692.92709690444	2786.98595214911	2337.53017616558	1295.04505808724	1798.65415949638	2731.65376436713	2882.17943916474	7111.06186075095	6990.94161845504	2735.47323393822	2612.52935595838	3286.27470575119	2640.96745767525	2964.79117789584	2949.0681141956	2864.65603147007	2760.24912987504	7264.6119729881	8689.96391342199	4148.94408023955	4418.68606454614	2497.25783751908	3020.74943737284	4985.82791164273	5381.40197043471	5368.05698384282	5394.9809124795	4993.16019123138	4405.9128596861	1621.74348069083	1435.35843987218	5008.2850816454	5086.56494855058	5370.76456320262	5072.56301167935	4289.9258145031	5296.97356178349	639.055988976028	492.755300856334	5999.60324275295	6084.64762876621	6013.26569463953
ADH2	1.34988243071043	3.03366312589846	0.987654663729993	0.862917402936114	2.65153820418307	1.74387460234501	0	0	1.86576563878824	1.94891602075621	330.324259953394	176.004684232466	1.55627559231939	2.41623539276314	1.01514472365113	2.0369915007936	2.51422074238809	0.398797753225737	111.839793071383	194.902507304805	23.8348612369277	23.853323260034	1.89110709157862	1.69548558724927	2.11579803452752	0.860651396165677	10.9519196245862	18.8029357784068	620.552870337346	794.677567306755	3.827009791237	3.791503756375	5.73436565680543	10.6275164506951	127.396533616466	123.308073106648	949.484201831949	858.842470705684	30.3379334160581	49.5444518108143	12.9927205751568	12.1690092748858	207.034584964208	241.874279002007	1.37332909747963	1.96630301247292	43.2742027656717	42.2010045977965	5.78479104966029
ADH3	120.690256056805	124.545724001032	120.292027754749	120.451216756785	181.027521306744	222.100996168794	367.71886603023	319.798819367473	148.090155541738	137.620914639837	416.454053973403	389.520970815753	161.50576472451	174.147295881854	363.047526443119	340.087296797156	190.843305539448	165.180792024234	388.833929520777	375.040709537489	417.386439010152	388.814962426777	169.08008653566	173.555009096223	430.456053286787	416.152862616178	288.094065739434	393.541953097057	491.670944601983	605.959820758728	442.02181776205	512.520175424337	350.517221477658	360.12804686209	395.533295585826	354.595990859759	631.499999912046	549.950582989409	326.755102500354	336.712604709255	299.459235093607	307.93793191824	408.429683200517	406.459276563221	84.7812118326863	72.8326257550793	354.576807693498	364.885510168656	286.750254382306
ADH4	30.5053839066745	30.15446866807	20.7043950183217	26.172131812629	31.1433674764809	30.4901795983296	43.6658303116636	35.8981024574901	20.3883584404791	31.9888088619105	22.1162115382489	25.3234379948019	22.5594782799138	28.7386974832196	46.1835012044814	46.3360265079053	33.6422019104451	25.6138584515583	35.0531777547482	28.8505699559701	26.5773281633894	21.9876618714645	21.2557181790489	22.6868416149898	39.6353076080348	32.2451881708925	38.2644103583588	50.319416044244	22.6232404460335	36.7573149367914	27.3110558877976	24.2391847772043	51.7927123923283	58.2360851269385	34.3575571160287	50.173928820255	23.1839343612573	27.9830307768883	48.8636622203078	50.6013665632624	48.8005836577905	42.278870229558	34.7784443654419	44.5955831684516	28.1767735574063	30.5202916772249	51.7131318556386	47.0567578990273	49.0229893820957
ADH5	7.56852060317568	9.86241386955318	5.37471047982816	9.81872002093754	10.0568899345243	12.0781548176259	44.3108936090445	30.3867462243392	6.46118061252712	6.17064117301403	62.0480583908502	60.6700308607286	6.92924712252383	13.1489060588276	24.1060622063965	16.1237721428843	7.46297709269818	8.68088877446756	35.2909908128164	37.8949469797619	66.8184566457372	74.7377460315788	10.1040874995292	6.03926130586079	16.7475434680184	16.1795848911959	11.7392133813644	19.6986205798411	95.6672330675096	135.900361091342	76.4890519938911	70.6523860066679	17.7305472649739	15.7728753714229	51.7883443336297	47.8031717765744	132.860232544787	135.057114770659	23.3468502041906	26.9970997943159	20.9746778186019	21.5460953989405	41.2355595074267	54.5560405736573	6.34116648369852	3.50196253062119	28.2754080311218	27.5204657722879	20.032843832994
ADH6	82.4223248935268	86.0347357018208	71.9870885704461	88.9639472311734	134.775634566788	154.53355815891	147.826582349617	151.32859736916	108.255187753307	77.0062171862666	107.695987910659	106.722372532886	91.0442394006501	116.249352295754	170.373392052445	160.191249700634	88.733491808885	94.4684266910191	166.975660907325	112.641066994999	139.056063055984	115.906570959265	96.8486954370433	96.5865021106036	193.78192041504	197.270125894377	236.324346268076	225.939861509946	74.4865458519579	102.55735316866	144.607930653338	127.873095245883	271.536455328264	281.013328003041	217.837256783056	199.861262550613	132.102062920545	115.45903800841	247.309547964	227.934665047275	259.703453830861	278.865433776052	228.208717131049	236.197420435021	178.244118594486	168.586875803278	267.803080979128	267.669789680378	267.220346266933
ADH7	0.430062792708434	0	0.943976520395204	0.412377458030734	0.422381431313208	0.66670029242038	3.98172466385072	1.01217446689378	0	0.745092171333159	1.39389011341939	9.76767634673263	1.11558869360902	0.769794452350224	1.94049919699362	1.94690785130639	0.961212115417325	0.762325430370342	2.3112172187234	4.067316781482	3.16399825765911	2.27984749103941	1.08448484792946	1.29640420757186	1.01111468107285	0	0	1.0571422161951	6.05984450000136	1.87539231661973	0.731551948401144	4.22780249649739	2.05528765153497	5.8042790085622	2.83169174527762	0.689208359677744	2.48401152653902	0.810329253781275	3.22180528862062	1.37256282052707	0.653585775307274	2.44860333438647	1.28492793195667	0.702669201849239	0.43753038590466	0.375867824531249	1.56077060281699	3.666796617667	0.921492622780223
ADI1	41.7789249186259	40.2392621880832	32.220321305455	36.8130072283344	39.9238890344953	46.387548600325	209.086584519103	204.630863828087	46.8208435091889	36.191400790071	142.73141144421	139.627705247159	31.243413609175	51.5393612476421	180.870242437104	191.690999602715	35.3324567418819	37.0284631950499	91.0245645295983	76.8891287935174	141.224341233296	153.638374624629	28.4741306566296	28.9324438332064	161.94065547795	131.746062657377	34.3542772931604	61.063612895249	113.363176803399	86.1696887080455	161.343273033494	134.790750547719	62.9568988640654	83.818046913087	79.3047869472482	85.0498018965321	139.135451956681	121.271622694743	71.9026031332516	75.6793916184889	75.5060272710859	67.5044003858828	104.584007550246	116.229363227797	21.8266955007022	18.7506011848515	73.7628153147341	52.9510150507649	38.7112240315422
ADK1	418.519934802221	392.883330950675	385.007341248523	446.683567685324	392.618147599009	405.979734162219	504.18745792786	625.95215999222	415.243354279535	430.391701225779	360.936145505439	312.940169215211	455.704151407155	477.519491782668	739.910268299034	790.36391271763	485.944561885401	481.56240908486	847.28385983162	657.377925697551	242.485467026931	265.259025204253	453.286676321567	478.330126703077	911.090970209013	861.373230932553	741.331784439211	868.337678337962	459.822310795545	442.924403398005	223.429481625577	199.35819432134	677.104698432782	796.907270050921	748.463459818131	703.396865699823	383.257409973934	373.537663733132	739.527612406231	738.164492053838	736.476539391025	736.233246280492	711.757753250514	745.128473208753	263.939526169299	242.428649732423	731.317666416264	718.200875039747	716.709783265833
ADK2	8.80370020337496	6.16673353825173	11.4186860575276	7.6742663821228	18.078966596135	22.332881584471	37.0494637725095	24.4872258371703	6.63717717241638	13.1726842965171	50.5829832708118	38.3746189726445	9.68839745997288	7.1628499230755	39.7235017427894	23.5505184389697	6.26078445448453	9.93067688860831	24.7314803364059	19.6798653500678	30.6182889102075	39.5988870990678	6.72734442993166	6.63457607112544	22.5799009237945	24.4931217282158	21.1032440847788	43.2809465417662	31.0123692789218	36.645571807032	40.8421021494686	39.3392313653434	21.674082393722	20.2531110396667	38.6445847507051	23.0868309331364	41.6041917038368	22.6199759266931	19.4860863163943	21.7116040518419	13.3793972462516	21.6447894179725	21.5210280247717	26.1530008758657	8.14236754349871	3.49742344936171	26.1410445900073	20.4714687679388	37.7273155131175
ADO1	162.56520688915	177.986223369763	155.54016726483	173.64499384557	166.939688992456	179.139469876432	241.203061911577	203.838524518457	180.041961388552	168.507001764788	147.110598347434	143.762051890971	168.598690491429	210.984719342001	248.685258844217	267.328234500493	179.60090442739	197.033503857365	354.064247443258	234.780119468383	130.844799162949	123.580668442256	195.431721646232	183.941519352626	235.203383208505	349.92062094573	297.791806858006	371.141555013128	177.835242453994	215.095233530091	168.596489122782	169.764200507533	309.877048052588	317.230394039501	314.103209252597	301.346643807804	139.997553445055	119.555321542127	276.706347542805	320.760719644725	290.698064349887	279.52077045745	267.070357165274	301.93424426531	314.755745875691	296.30386394624	299.191217938555	310.975661834384	293.746724977898
ADP1	9.78452221617985	9.29993010198375	9.89062847959551	11.1104801993021	18.7137528508844	20.6569366848563	27.7133396969645	25.4524018563095	13.8797249250653	13.9406663406088	76.3616297211236	78.2996806924356	13.6924907771611	13.3658557435734	22.945886402074	27.3928863684309	14.8190952501971	13.236175671064	38.5727152183628	40.4240867968246	71.0381596854155	71.8893277988895	16.2326019469592	15.0385599167875	20.8854288342546	23.8863415704653	26.1131204374512	36.3936105455246	54.649129320242	52.4925137193637	42.7046483729212	43.393281719117	39.9926149191909	39.9642759534648	29.9519803606727	33.011516822218	60.4806832807581	66.7094350270132	29.4166842396532	23.6262315921578	36.783649725719	34.8182634989981	33.4651747297979	32.3940450941429	5.63211413947925	5.85104749248438	26.6323343853853	38.1448571799288	38.0684694704689
ADR1	1.10722568730137	1.26031787242705	1.32563886882083	1.640807745307	7.41444773695629	8.42631793813368	12.8140353249004	8.29156402524472	0.730403719098686	1.56951144053931	49.4258057892507	44.9608942400201	0.522210709148321	0.540515465228617	3.63342532690647	2.50622722167809	0.89989558173021	0.713693483470113	26.5063369057341	26.4645808575625	73.0172467813877	75.5934462343229	1.26912981378365	1.06199058174826	1.1832653659313	2.88792921619962	17.762186904433	25.4848579246231	31.5576226197746	41.0407351823635	91.2612119041783	86.3716537989259	12.9881963588827	17.4908196669971	17.8945915906458	29.035925530883	47.2862666372928	42.4835251803369	18.0976853154698	16.7050344470855	11.7789177512824	16.7631870029263	26.4651331219966	22.3666685075853	0.921646526034974	1.49553894692938	14.4294106655093	21.8846119442117	12.9406310027596
ADY2	0	0.563818449156599	0	1.12264238966118	0.574935576740385	0.453748869478062	5.41984315892374	1.37774668712469	0.606832373273657	1.01420199844821	315.90630289685	212.729329890612	0.506172194703459	0.523913347443693	1.32068105529255	2.65009080990917	0	0	33.032784591478	50.9342951355734	120.589529665638	122.062171550681	0	0	0	1.11969253223549	3.5620581982021	4.31687198614703	96.919966937717	137.847732449537	40.826738983059	39.4614191607577	0.932537677385473	0.98758812055072	24.4114609754659	20.6389929828701	251.334562896026	281.264477225178	5.48181542064196	9.34150372643004	3.55858802943657	7.49922384805456	19.2392058392634	25.8243375206447	1.19111527818269	1.02324876865969	8.49797988296186	7.48675862088625	3.76294624260576
ADY3	0.874329521343377	1.34737493890225	1.53530950460322	1.50908015851147	2.57614328728344	2.57530543741677	3.2379877854086	2.88089235980705	1.63143578462705	1.81775225172634	9.9183794727127	10.5909685996192	1.66322024057892	1.25200972510776	2.36705637860485	1.18743762571568	2.14959424324199	2.47972639436665	5.40359525061919	7.93824039019028	4.63140385390418	6.4889774334102	1.61684623390795	2.24028240500613	3.2890037274375	1.6723497142561	6.38424830099577	5.15808131837342	8.62390865163126	6.48163268768392	2.67708429190942	2.70136310521737	3.3427696706784	4.72012644545124	4.22173807607439	7.84661640828434	9.76346591330576	10.5434630141297	4.58502272461518	3.34855628050602	4.78352984179938	4.48028346588598	6.79199831021674	5.14276874964882	0.889514229277624	0.76415310325396	3.49040862529076	3.35461992630011	5.99497164035611
ADY4	4.15508325168864	4.00195064863011	5.53731799945897	2.27669860606192	5.24682753987315	4.37092221421761	2.06087772110776	2.09554041548851	2.4612884958255	4.88485690250176	6.73358639064923	5.24284480429003	4.36266966429369	3.98433562937534	4.01748430912454	4.70254667053141	4.64341760517782	3.94566981436846	5.98124388713514	8.42068850743075	4.36702477452002	2.09779479978363	3.74206685511263	2.46032219407015	7.67561867208684	3.97374916427325	3.61189841227959	7.29544376621119	6.27296939107637	4.52979957172254	1.00970532903514	1.25042170169603	5.67351011735029	6.50911359188405	6.51393248426018	7.13444258040039	7.4283967428261	10.0658543567875	4.4468160693974	4.26249901579464	2.70628663752289	7.60416166733369	5.32046737635924	5.3341172669647	4.22725022570514	6.74419147090288	2.69276950365262	6.32621834155523	5.08745587608199
AEP1	14.0168705346915	11.8802808634828	11.0760352987044	13.7093453030847	13.7665446323565	13.2550373517985	26.6039084048479	17.1545155381278	12.7866193447433	12.8707976392733	44.9763642069531	29.0056924524872	13.332004753616	14.5520008104117	14.5465850681275	23.4783514264361	16.6041251904581	13.6654221163488	32.0147746654125	30.224767556489	38.3618304077095	49.5374987168641	10.603869450266	12.6759747504821	15.1592513741466	13.9414093876856	29.5677470659521	30.320479706119	39.5013349654781	40.9530935119639	44.8253658520978	48.4252335796775	33.4936279936037	26.0119186359307	30.1488656559033	34.144032012323	39.400836184247	48.5957068584759	31.5022050956796	27.7359856003172	28.5448300330828	27.5332702090019	33.5034504567806	29.7723912438588	14.2603143135906	18.1308571116997	34.0827628023717	34.6581183183597	25.8291943125587
AEP2	8.62589180838255	5.69692057351188	7.57345466652569	8.03489317595377	8.47183236800418	11.6529353808062	8.5567283898699	13.3409823354967	6.8979743399729	10.0341750969234	27.1589291386995	18.0364951457906	5.75374440636048	7.94055987387049	10.0083145756735	10.5992421986653	9.36425462737642	9.39254727717398	27.4829750233593	27.5039179306724	25.7471750100742	26.1300175205575	8.70075301588638	8.72937083706944	8.69152810480909	12.7277515269458	23.4945593936521	18.7801711462077	25.1769944870501	28.4801567243995	30.1844183923841	27.689281164669	20.8080530354882	19.1259074061789	20.0139042177928	26.067516608485	23.2505573510852	23.6828735054731	18.0015118588478	18.4843478295936	19.1019588196259	19.64498939597	21.3541458551271	22.5498063735722	8.02350437514404	7.3235254530582	14.7580040574233	27.3171096355333	21.1230488481479
AEP3	4.22217796466787	4.51841439323163	3.3466142337567	4.27348681636342	4.14675963640471	4.18176848489954	37.4620660033134	20.4262610791435	4.61995814667295	3.65749684482557	23.1878364325768	18.3502737313866	3.24514915306905	3.77875134588612	12.1714660959366	10.6188604156647	4.98052082037695	3.74208402331074	11.6604436364701	14.6414283898156	37.2753418873246	47.2520248733356	2.16883502644757	3.18187417526655	8.27224445955357	4.93525258280019	6.1849942833012	10.3785436418639	14.4600841092017	18.92323093856	75.0127868177216	64.8952403501305	5.97864267734001	7.12300535060943	10.2964344900509	7.51819799726101	22.1288926943419	18.562720610967	8.78621090448539	11.2293396058412	5.34718328706771	5.34206956604299	7.00828561053602	9.19800588150516	5.96596900659174	4.30513455780457	9.36405818022106	6.9998071110905	6.53384210746289
AFB1	13.6923819393597	17.0665658860914	16.7951734259735	13.9016846407421	16.6120525638102	21.2265407656411	26.0998733349852	13.2694254745286	23.3781681770782	18.8383370559741	24.799965989597	12.1955067749225	21.5895563839341	14.4169395610487	25.4396452324529	34.6392651796541	15.3016486402198	20.7017482038103	20.5605314750618	22.8522282413105	24.8877157872966	19.9255727701696	17.6025067296651	24.8864520522368	39.7666122982498	20.0274519248402	16.3366926786476	31.6776065586751	24.116789922559	26.342164733085	31.5117559358661	31.6718848369264	20.5291006461157	20.3821590185399	28.2842161946183	27.1062154178328	23.2606840455391	15.1760654677089	28.6610671274307	26.9910798057321	22.0330223687917	21.7826777125053	21.6581140131037	35.5314749751656	19.6661707032113	19.7103101765509	23.3845407706632	20.6018646352706	17.2580278136476
AFG1	13.7302245423755	14.3262551763377	16.010588256811	14.8113656650855	19.103757203479	27.0499389068544	28.4698309946733	32.3147992470041	15.1226919775725	12.8851073377795	134.895411512136	113.332432217049	16.8188801968688	16.1283675781151	24.5229406336521	27.8413027569895	16.3029180477261	14.1972070320113	67.639015095854	76.8299705111632	131.318395137805	111.202074685652	15.1477474182927	17.0299170548666	26.9008096497223	29.5448920987232	40.6132573176163	57.6569595977949	89.1762978373642	116.005701910649	108.506491306204	102.036538293102	55.5922565826817	43.9143625857541	53.9919234153047	57.3015306228918	116.203818857903	112.645110208683	52.5013984300615	44.2770702682232	45.645427663446	48.4519423864725	51.2785214103542	54.2142662795366	14.5507252623012	9.7500446876506	43.6007691204279	48.7777786268632	49.0328400267098
AFG2	13.4762125495292	9.5639144771555	11.0924937295262	10.8817728016048	7.83683700965451	9.20870548539572	12.7232028024615	12.102551889161	13.7859819092112	14.2851716265398	7.18391052750514	7.60712251775334	14.4123004125053	10.4739797468809	28.0030127900649	24.8846072414034	12.483984654876	12.2582153753153	16.4381391066919	14.0866962463236	6.26179200227958	9.40002748007204	13.7123827393604	14.5656379074956	39.1878137794284	35.6119133143183	24.4566411252016	19.1782270006608	9.0571919739965	10.8253397792581	6.33412842062636	5.47849362003712	18.925538481351	21.8376319098737	13.6212318393445	15.9133592724601	9.5589999575238	9.68907419377304	18.2652452553577	13.0161915326119	16.1687856135493	16.405716321552	10.5957811720256	13.0372566095071	30.1264333220482	25.1057811240302	21.5579669190527	16.630392074122	17.4772549147033
AFG3	11.6591011009958	15.6159259515722	9.99666430785906	13.9746226653884	19.6811706578835	25.2760000972562	5.48162959259084	5.14507378131087	13.97457535989	15.4653407258286	46.9407313132125	42.2952196439485	15.9095420940207	17.7715168681388	8.21993025134443	14.0200186485263	15.472391922211	15.1771847655861	46.2590104773434	51.3426105302388	34.0427093096018	39.9171778970249	14.2409469760539	11.6695249439568	13.2774950118049	18.4677035569549	44.3404292539664	45.2280617062257	48.1301092009711	52.8283406654855	15.8040942898734	23.0256888359762	44.691581542545	43.0270331138541	38.7838051330182	51.3827308980982	61.3796272825066	53.2041265952277	39.5778010151247	42.4432515836723	36.5452116135478	40.1924440377406	40.2776652753838	47.9214308863303	16.1243520898671	12.8966094234421	36.0321324312853	36.8896334644411	33.5694388349097
AFI1	4.74484034800459	3.83288257082969	2.85568211978323	3.66916121077292	3.60782124446383	2.37279627332198	2.47992642884726	2.88186944144276	3.49063996601498	4.77320174019281	7.19329495856151	8.1114274605231	4.23508113695837	3.28765091893103	4.48906636400821	4.50389220482333	3.420966787453	5.69756604136776	8.02002385557469	4.0531742546067	4.50428104921725	5.40932985318351	3.98835344329471	4.03716105363146	4.67813486541261	4.97690439975373	3.72541978305781	7.90098298270767	6.20053994017352	5.33962188525515	2.08288505635684	1.71963481039123	7.80243884880714	5.93903168349714	6.718668340603	8.58517609325627	8.84060425820906	6.63310426828769	6.87987232474271	5.37345808016877	5.582667879564	4.13944018197638	7.77421235032715	7.00224990615465	7.31873059864616	7.89255449397578	4.72158298623136	5.87259085193235	6.23123633592307
AFR1	1.60038170182865	1.76160560616496	1.50548887137602	2.63071554914726	6.96082361395644	6.55687560751724	12.7003907708983	15.6044042607711	3.55500869367623	2.17854575660792	58.9101874640686	61.1575172713105	2.76761380201719	3.06923380263059	5.67377139150487	14.4900050664899	2.04397034617955	1.82367315626364	23.9590668766533	34.5957018975117	55.8430244963215	46.0557139468258	2.49827337470099	2.41214129574005	4.30016248692184	5.24759243733233	23.1861697303409	20.7935698241612	46.3088410949778	52.8398934311291	36.9457128992403	45.2720500425642	14.5681963700919	13.1139331526491	23.5839892426994	27.8457523567709	49.739991352656	55.5704726110074	17.9838855666834	18.2417585599045	14.2456223737758	16.271343443965	19.8093963998383	20.918592002605	1.86077441900262	0.99908122789978	14.935049750242	18.5184309713226	8.81778442300109
AFT1	21.1053603105699	19.1548253493634	17.3721735823687	15.9565178901038	15.9449336648574	17.9322194927259	23.9557270808516	17.6719582665511	17.2502376182536	23.5565861669921	57.2237537816979	58.8946088677098	20.3548813746161	19.7969752378995	15.1086448107176	15.6179024045417	24.4929683112136	26.2597601764263	41.7157752124073	40.6885119943056	64.1994585393522	58.0934496674663	18.2521414077455	19.8815951483601	16.2221288031076	12.0329855638274	37.8687335462774	48.8862494072514	46.4668185963093	50.8846874387614	56.9583139276053	64.4097821021185	31.3581809339523	34.5787659441558	40.0862640525001	41.6283315126307	49.2301256115028	46.6496027217865	33.8265622105336	38.5369298023414	28.0654691017122	31.485700703241	47.8998346609888	42.1097254228789	23.9494473807948	20.5741832147393	32.7738835722751	30.7123496089486	25.654998729739
AFT2	25.7218616546087	26.1695989161226	13.9159253208975	15.2848571115872	16.0114286097673	17.4102802984165	34.3801328322056	28.9898889699278	15.0219445367298	17.8881956545665	44.0324575626869	40.226728451983	21.3011952415682	23.668980420425	34.3277555293177	39.3612999463579	23.4817475172807	22.154975917862	36.9919648761889	36.3183787550231	41.5789443705904	37.770137055949	18.8802025742418	23.2065889778421	34.9218071638068	32.5681604564502	21.3096028703965	26.7156854151603	45.3046215397304	38.7052838518306	43.1376694769685	40.7023063227626	30.5872016237349	37.8934712830404	34.98565848386	41.8018551700079	30.6900801332126	46.417448640243	29.1756446943051	32.3744681553576	19.8206486071967	27.8461423171827	47.6260159987278	47.9455170455757	15.848574349103	25.3302816295664	34.8415681595109	29.3442450401449	26.3926913912008
AGA1	11.5765780599768	2.32445773576034	4.3297667059515	13.8169856750974	19.986331224638	17.6362975760233	3.99184692562936	0.0138265262222836	17.5841798088127	14.3640866502546	8.34372336299302	0.0212480189693649	15.1240838715096	9.10984386441424	9.53616800266186	4.65801531980156	11.3327040204338	11.069447445856	14.9631832442779	7.62864537920342	6.23038380969121	9.49159482113157	12.5807371916889	12.8869278898552	8.58294828451573	5.00909432854686	19.8385953944567	28.8097950618197	9.47544741709278	8.47289127628412	8.8245127084933	8.34953261526881	35.8377149843984	28.3155081369147	6.58628189997746	11.1092398528879	11.0863319993294	10.4401490739057	10.1964244419633	21.5227608063563	17.358538348642	24.0669641625735	0.000852164896969894	9.9113358784687	14.7103487503686	14.0950740893898	13.2650911906216	18.8209630315951	20.2955444421683
AGA2	120.380702083015	152.835927593938	162.143085368347	173.146289566328	779.248090843119	670.134712551599	303.96616454135	180.296194098408	158.82326020398	123.241219975235	79.8075156727144	69.0432124173559	170.328746639743	146.915794471096	123.448733176705	371.569530434059	67.2645602824801	150.340051563933	183.790816334927	165.600054344144	72.4620389675223	38.6764744310954	137.983335107266	107.215154285418	231.566424500798	198.856211476729	488.337943205561	430.413561789849	125.290632128097	178.959643291498	37.2313577001073	15.3691191813075	889.105308620696	636.959777266452	408.325756678695	254.302859441357	136.955547729511	144.341262806	389.427036755762	462.78689355282	765.055358341002	669.823347349691	196.183710793276	250.329351454373	384.114113506037	267.810701423922	327.662021683083	454.877424713998	715.197005700088
AGC1	1.21127680013388	2.62493265874924	4.32043804070837	2.75849590166781	5.0559943666077	6.80692803444031	3.50456068946694	6.05794719524447	3.4530154064917	3.80364204968799	13.4953260744676	9.93448104283542	3.53483876600155	4.06524577705508	4.78228800584155	6.16892831688423	4.39931246551246	3.75743409372655	13.2225736712274	18.3290845696475	11.1393359260924	8.2941091616845	2.67265970010179	3.19492340292541	7.11954502318704	6.95053721572772	11.977089558521	10.7932738502914	17.0676675210424	18.8173969820321	4.37842235812434	4.46538266971257	9.16551744633079	8.94025566597742	10.9663302120047	12.132302598776	17.7822089689973	13.4085103902623	8.79072764185251	9.18140457057891	7.13326570891191	9.05172641537974	12.2141966803227	11.1323143105634	4.92926445260756	5.02854143269307	11.2646188880954	10.0048830872258	12.3281319930011
AGE1	15.8422268817294	20.2467412232699	17.3866996468187	16.9436040776273	14.3624376174415	10.862787086536	11.9878611210603	6.45325471920412	15.7908532134333	21.113071081831	22.2173834182676	26.1402664088252	13.961782831602	17.1777825518616	13.7466082499845	15.8608279793256	19.0659974938316	18.0911836568652	22.921897791831	27.0843254884332	26.0001717110026	20.4573558224674	16.1333690748258	19.7451407246515	22.9209209006563	15.7336080595529	27.1893592295404	23.2154310455731	30.5864151271836	32.5491204583122	6.73707374938964	13.2635874727407	22.8103017985095	17.9891220987232	28.0838292102585	23.435466285586	25.8087469144987	37.3125885804932	35.9469500757477	29.16993603416	24.0762016461505	24.2845002619392	36.4100502781145	27.875339238461	18.5969844783008	17.0411341113843	25.4301946645776	30.5215610634196	35.2506825269127
AGE2	30.6527552961101	28.4688339452157	25.8315182803757	32.5417161241316	27.4174026978217	29.2753910274642	60.8139207425621	47.6659833594957	32.3430015981479	44.5717472998722	79.8351547504832	85.6433547097226	36.4438223480701	42.1302476655832	46.92647990196	59.4712235325795	38.5373362812157	42.2065536153172	63.2455805034473	60.0505864463521	81.3466005323835	92.8552193271062	35.8878137806782	37.1256151561726	56.6245966750465	72.2410283784995	61.0630764306953	78.0389330460131	51.0973762805606	60.8671400924726	94.9723924284064	99.1647010109264	67.1419861384471	66.4879556729955	56.464341855929	59.6501162172137	82.201443539414	59.819040086524	62.5347796695041	61.1435597244445	57.3990764130649	66.2262577470629	83.4069310967141	59.0263368087868	32.8558557246718	23.9198296010139	57.6089294586733	64.1714856042284	42.2226772861418
AGP1	14.966095331671	18.5022694973667	8.82545038658435	9.21015441945065	23.6935812310662	26.3176776770219	70.8327433497471	48.3667725830902	6.71511178246645	9.86852693019149	232.400292957123	257.613473888596	9.27100861382451	9.59593776018288	13.606616859375	13.6515264756517	14.2287647911082	9.89880721860215	126.647427895504	136.471995070007	249.136831906177	260.908185372815	9.575787320505	6.22850323024976	9.45310510325826	11.5358462544511	62.0710987668606	84.5584871921806	95.6050275016832	128.57829790069	343.872202417203	348.837923573809	62.2719401144474	92.3269057089172	135.312045414106	147.843866279826	141.921625391286	145.205123190447	103.333036170524	153.632278024674	52.618125040823	81.7135058053742	148.161217148741	122.628806572146	13.1807481314862	11.9088317346571	85.9303725705129	92.846065692913	61.2639733252961
AGP2	4.06298230462259	2.30191700740533	4.7213929573011	3.89592527701768	10.0934307886847	12.0414939754158	43.1490500581744	34.3123564381251	4.21179119961501	6.62513639006687	74.7514927487798	88.0575671472976	6.40632789573998	6.84479132689777	11.3231865573265	18.3933295987708	5.0746739675495	4.44830421535555	23.1195364888811	23.0554615904815	149.106684684264	152.882835861801	5.62503568932257	4.50282724237164	4.49526822896184	5.02855460368089	17.451500210891	18.7995654302631	51.3566687876193	78.1657467636038	184.165832228201	198.031541205755	15.2291655347973	18.1442012149656	18.3594125831152	28.7261360235907	107.674743700129	83.760198442557	19.2474703862187	14.492769993724	13.4390770961915	16.3292166512975	31.4193665654384	22.6487020077154	2.91780596720873	3.5510091437979	11.7095002011739	20.3775246018542	11.7783554550715
AGP3	1.54498536430227	2.48008312264119	1.1304032319468	0.246909851508921	2.52898781161049	3.39306809119058	4.76808402231879	0.606032831855838	1.60157146353966	2.23059975454685	15.4398316108885	14.2960033826188	0.890603900211716	3.45683714523147	1.16186480614095	0	1.43880462083759	2.05397099366781	6.57320800758465	12.6635081932301	12.5032428719576	6.82526019372271	1.73154760431058	1.16432296252908	1.81620196925979	0.985041084641436	5.74513970375773	6.32957294290584	13.6061433466439	14.036012700099	4.38013882915968	5.78598377240075	5.74275399718687	5.64737217416406	3.95607847676964	7.01521759652136	14.3771745818808	17.4664374481224	6.75164104924671	4.10907608151712	3.91331511865081	6.59738822916966	4.61607033983617	9.25584825900345	4.4534826585949	1.57534826325815	3.73802188274626	5.48868790349371	5.51741641013333
AGX1	2.78319632239481	1.14884546810861	0.436361643411942	2.66877455993157	5.46698749308708	5.23919922277135	6.44204382832201	0.935773251597397	0.412161960994074	2.06655190321007	79.253448578838	62.2094913573794	3.09414633199714	3.202597435097	0	1.79995139110958	2.66597938539287	1.4095662661432	86.0048649353304	84.2309181265139	41.5375201795782	39.3448356443658	2.00525394087566	2.09746085814672	0	4.56299556535538	25.0001291616693	31.2751160356117	92.4405503015231	87.5586763934684	17.5847203067704	15.6347491620286	13.3010761122183	13.4154512629433	50.6137535462196	36.3196436546237	62.0059500098791	59.9329675524667	33.5095092802265	25.3791871868123	13.2935576506194	11.8848376602779	46.3297054544238	44.1748466133563	1.2135182638434	2.08498649284229	19.479987116778	16.1026101095752	19.5945404060552
AHA1	57.187998404974	51.6377961663965	65.2149218260897	92.1081060929175	86.4439511418943	108.394758875003	241.985782427763	205.046739331017	75.955652349752	68.8908964535334	97.7452771446498	85.6891663832196	76.4911211080836	83.1708554689218	164.298903841381	171.920641328588	106.348926644941	91.8673938068464	211.894308612521	226.48317036821	73.6287173024488	77.3703843721021	78.4895578616862	85.5219382359782	201.680771753296	180.313837039498	124.150210429875	161.440858664649	166.041436711319	194.829425154297	83.599145425422	74.0391183679275	192.878399853416	163.561943900891	141.205049345364	140.336112684329	111.82535596641	75.764451820413	120.493884057456	123.341973304344	102.527919420983	110.018908488632	128.148311652823	149.646832787809	10.4544397160207	10.9334690465061	123.229989999407	150.468755796957	151.255642882474
AHC1	20.2695152106888	17.3262611143857	12.7912214591921	21.1367328765257	20.156358589669	21.2103242793554	57.4724660787719	38.760664273165	22.325178848963	20.1924804779303	98.5442393229426	101.024780975635	20.1554724072731	19.274598377613	28.0092953305215	36.1309002757465	22.9349247565865	21.7823054463954	50.7212384241611	65.657066163626	111.097825480269	104.318757953608	20.0194793885568	21.7674335317495	33.9545309117572	27.6235923033478	41.1127812638528	35.5001726428528	74.9724883414336	79.5514146887842	73.2682917654752	90.0243154985108	38.7476142340429	47.0191572637249	38.9265272044605	47.9132350045201	101.953161333705	108.370143267296	36.5386977530044	49.7312883934387	28.8792809753222	34.6220297769462	51.4766719046571	51.7467401182172	23.9725870902466	23.9156830889445	46.4358473011825	40.5051759193405	35.8309659081117
AHC2	101.530000604186	95.7927971508722	113.702214204788	133.118456877976	107.856943955791	99.5773340372719	235.003638354172	204.81971153919	85.9174396990287	122.054954436346	352.578216942012	318.967855844509	123.623042693975	133.519295303881	191.661643812737	225.125546109893	113.462687078843	141.406018199636	342.415478919155	411.523499018888	368.909006638709	366.143853298005	121.91806650536	115.552598319354	194.862331256569	178.345861847373	222.745158252536	234.292412015004	354.006332047958	352.389893923244	313.691837498692	261.894496751017	267.364190994592	230.712308941836	272.862347928038	305.496308461873	331.114260755194	437.265839994814	279.40867846026	287.665967990431	277.110467407184	215.302497882293	247.631587574096	287.764344916113	67.4570632760467	88.7360943538185	206.794596834305	229.666189951148	208.668818297891
AHP1	487.320403729524	468.80123068228	662.075362301739	738.852094439068	164.838720567983	201.224007556643	2067.4996752093	2061.69562135077	872.82887289675	747.031177817139	2805.99630739615	3362.66469268412	734.386832165842	770.338265220476	1487.97873406058	1526.47744985518	923.713751266595	858.788196686242	1474.45892173376	1309.80750756902	3494.43964763516	3601.18091610184	684.751707524276	715.927314102068	1330.648881136	1632.5463795772	697.506584407942	815.369996457525	1421.4464508691	1985.67475187247	6214.27570547633	5874.94287375794	609.08968374763	496.865180630946	721.918397064716	671.513955051846	1937.63638696004	1729.74943013973	600.962923128856	618.892790310004	569.171370121368	503.757674273169	698.143371591429	869.723920615841	577.842090197588	575.11140980528	553.567844900675	645.19511207399	485.659395753554
AHT1	0	0	0	0	0	0	0	2.5881907237519	0	0	0	0	0	0.984206343701519	0	2.48918639798343	0	0	0	0	0	0	0	0	0	0	0	0	0	0	0	0	0	0	0	0	0	0	0	0	0	0	0	0	0	0	0	0	0
AIF1	13.8227204546394	10.9639172482446	16.0626733044184	16.3730217727123	13.1765588239812	17.01682779991	13.1741791187492	14.3525902592572	14.3290048014037	13.0306033847216	36.236437877991	37.9607450182435	15.4674658365095	17.8288905646087	28.4334123369989	26.6868307423389	22.2622880389282	19.0971834145734	25.6721351589911	24.6077502701707	41.2761149861458	36.6384982690397	12.9858280622048	17.7701794911523	28.6751126400642	37.3256856142168	29.6859639938765	32.9784426843388	38.667780383404	34.5708544459377	29.0454923196911	27.9767143575567	27.2009301266963	30.1783960207768	24.9842695423704	22.803549439678	37.5714355065614	26.0449203715947	34.2638044205367	35.0331879782878	33.364177161099	27.7768833564585	19.4349420184797	23.9131067170704	17.3716938239814	9.59365493658089	26.5580274706229	19.9314035468095	29.6179231096902
AIM1	22.2390091696052	21.4194696704034	35.254580731321	30.8020559030686	50.9642977532454	74.6977691136784	28.5971442963327	23.2625073768147	28.1766145763241	36.3889705919321	104.115120416477	118.479656135165	40.5955696334436	33.1722973536587	27.8737654541494	22.3726246754525	33.136932111526	19.7103383225544	142.754891896529	144.890958127536	87.2609857745173	87.3284099973884	29.078558661721	31.6570325737033	46.4763260466444	42.5370399953472	125.298725545273	127.554077591108	147.97657085731	199.344963036019	29.4229157759172	20.8213691180503	94.4719471060425	91.7115739298267	189.816966286835	166.318852511245	199.813006172381	190.890977472446	64.7903942449169	78.8629351308402	108.903771417697	126.620071498591	132.890379797313	109.007668240241	32.6809154705012	32.3943188480288	98.6446964280967	94.806837391822	116.481359642794
AIM10	3.97426324706286	4.54551170938708	3.54389329254114	4.28719108881427	7.31865215004794	8.27892166100126	14.9482070875002	13.4458338690093	3.86231745799442	4.08825546139766	28.5799633975648	46.3858883086454	3.86598773120049	4.44608742523749	11.7681543140149	12.3692357716732	4.16376670286278	3.96265722562862	17.3535876610378	19.2631075755248	34.7212004620917	39.0641981284514	3.75820077870856	5.42853495275766	7.59186969026381	9.50207679877718	8.5648244410206	12.8220460460937	23.1874018153107	25.4544608442655	30.8441838189135	25.8138556678011	15.8276228635392	11.7333413203009	13.6291953581706	23.0878692654755	25.3461834961233	34.1654766822537	9.30409340114061	10.305786582471	9.43729234295976	14.1424174353396	11.8741904532485	21.5095334613337	1.76893458310839	3.47345219319681	10.3667481133069	13.2364600400651	6.91892189845078
AIM11	9.03413771097654	8.7012156584374	11.8978462844085	15.5928120516338	21.2946924520007	30.8113239428087	33.4569844051212	80.7968510415678	9.36502695153994	15.6518183945281	67.3461482144992	59.2759126049259	10.9361911161362	21.0219640811843	20.3816538570078	65.4367629875103	12.1150725437777	11.2096739938831	80.1086338279412	82.0229584840658	50.513276791817	54.2772988066448	10.6312786363423	9.53156085806381	12.7440482808011	24.1917069404256	21.9887759484042	71.0623123884191	66.8309499784682	51.2142068404227	46.1023102080408	22.8372931171177	17.2698296910304	33.5303203475597	71.3808033210694	34.7469977094817	76.5318271050559	68.0884544540987	47.3754523400024	37.4827267564626	35.6969888916614	23.1465545496762	21.5935752488374	38.3777352266892	11.0292614918446	3.15829274034296	49.1797621529142	38.5134117443322	34.8433382687612
AIM14	11.3109392791197	9.19946314394745	9.10333355529095	10.604835450586	11.3557892239714	15.1967588784312	14.5447481406023	13.01464527994	8.59849922562302	12.8465247779018	46.8437374333216	41.2303806358701	14.7790413183015	10.7979368424449	18.7133662118422	19.9130908120919	11.5167158176603	13.8119933601478	27.6916901090656	25.6735853239185	40.6830689560126	36.4210490195418	11.1978143658852	7.95581037158525	20.0925071876378	20.6731526328588	33.6483411419985	24.714230777997	38.9590995184129	39.4592677980859	19.6679056204512	17.6498748741517	32.4332776546865	34.3478642171506	30.893539384422	24.9745191256391	53.7168508614658	51.6227784373524	20.7132067440145	28.4783966248586	19.8637324894392	28.264476933739	27.0356181112406	31.6224574410734	6.90441840479647	4.61327683638701	24.6296216733688	27.3244454693257	30.1602614057683
AIM17	2.85905432570061	3.05965030992091	2.09185545189746	5.48299612195202	18.0959562636631	19.6988029674731	393.381477974787	328.970249511058	6.25686181246692	6.32931794816593	1127.43654834338	1187.28168774957	5.7683299061231	5.97051862517347	174.872692583806	198.460285396959	8.52019343163228	9.5727717229703	139.138600681193	228.333715388102	1751.45189228741	1707.06007642512	5.87454378107045	6.70328137968277	77.6749767202836	77.16755066243	32.8612076431434	35.1393680047256	642.897602299551	707.188605878378	1789.71880952451	1743.04457503329	33.3998068107387	31.084002674234	87.85060278814	102.328262803058	1069.11244236701	1051.07491721992	45.8120002250203	46.1309555813868	29.9325154676617	32.5566960868038	119.591036814163	139.621413943259	2.26233192398818	0.555284212152404	31.1280360862172	40.6281222190227	25.8656819043437
AIM18	8.46257369908506	5.75346162146752	6.0096149940539	8.1146202416485	19.067425452919	17.3634841522778	21.8921156102124	17.5739627260285	5.16032323333623	10.7805938083547	140.369234448855	155.773496147583	8.17823086690308	10.2469594534267	15.7229680058019	22.5355759880805	11.6823945547737	11.9123271219456	68.2185796482457	84.7430070081422	161.87584613166	170.650980678607	4.18431063970291	7.50296842382016	15.2147901726187	15.2344203001624	21.2034587060107	25.6965394396175	100.830295031103	146.526913627285	132.943934474979	99.9714697540256	22.9970358726058	19.3157131673799	34.9621068005235	32.7082627008249	143.763084830131	148.19706265571	33.5633245534909	20.6537130850289	19.6697378161862	26.9255752975565	37.1828077630287	40.6671068653138	3.03866917609589	3.48056750976572	25.2924094809227	24.4048973538389	26.6657954872891
AIM19	6.45943364237959	2.28658456883209	1.85435651925052	7.30856673605864	14.4498951982861	14.645948546931	58.4879247307447	68.7122396849616	7.62621305498423	5.2217416389324	282.367246178316	224.212998566252	2.90976568793903	8.13123965647135	47.0325546792348	71.3998001188444	2.84268757579561	17.5041969641645	101.773451315845	134.38728184913	341.164072733131	262.069934419749	11.946655510332	3.3248532128046	48.2741864991248	13.4605601331834	32.8772334354513	21.4744392781166	271.808759620289	288.345743278788	311.109624512579	302.864578450664	34.9228515936255	17.5304756124362	64.6739390615632	52.0887968886932	283.655373951257	203.848211497023	37.2254621614597	54.0491929978572	35.5127924027269	9.40468477052511	65.0911124494753	79.9992709834825	7.1681705853969	3.6731963041881	29.7777092805496	6.13309825195271	64.2206744612681
AIM2	24.7248213833684	21.7723907675937	23.2585835618901	30.4817847844658	18.7327028646657	21.9024786636421	76.8493012290343	53.2033266798485	28.55950468538	29.9851688284645	141.955588958933	133.703565551108	28.7085257092526	30.3470600134478	50.9996602980022	78.3507546062215	33.1567756499361	26.2961032955251	102.503295519735	117.585097196328	136.166262029251	152.291759710195	27.90825507126	29.2803294929911	61.4516724928696	51.3448873298192	65.9103444107505	60.7762463693069	120.69111563709	130.922048631829	117.761923317477	101.192848778829	50.6402505959742	70.3145328662774	63.5680830430273	82.6427032209827	133.287952139483	114.469561844887	71.4437687153471	73.2735655502111	51.5318861381475	53.2926715209094	75.9826177767428	69.2524538718769	24.4354572301888	12.3480675871281	62.8114803537022	55.7134967093959	45.4093608188197
AIM20	38.7680558450142	54.231216210734	44.5736951981286	43.369605644553	19.9444320907187	30.050017827718	34.1846143268645	21.724548039129	47.8429912189752	49.5753436532925	22.4384960404178	20.9647396622889	44.6955619196593	28.914156260087	52.0617738404149	58.5018233711532	44.3559356185923	40.0867819864669	83.0902779094601	78.5677450553172	13.5818793441954	8.15542884703458	41.8977663345799	46.6068352437421	73.7857915468528	58.2627956631793	69.2725556369426	93.0275216593997	48.7739676021091	52.3275216353161	1.57014563279641	1.29631821170078	80.8737527717785	57.6179840779151	68.8810491136947	71.0048300507419	28.4349585505265	43.4816668173901	77.7941912892017	69.2304110553935	54.7094982582746	63.0665800085681	74.4621881295215	61.8343914284038	38.5022992684724	27.4290546616503	68.6733517558834	74.7657944066279	83.0685762122833
AIM21	6.81727211160214	11.5403028977522	7.48187826938899	10.6968282186953	12.7823462614296	14.0912288839156	31.5587832524159	33.5482211236106	11.3499647142928	12.8847686466906	71.6437034229186	80.2852715820866	11.9680252758142	11.4630861610482	30.7604562169999	31.7972761777484	12.9283614463755	16.2954008475913	35.804336522755	44.545878496641	69.9129055415013	78.485144101544	11.8079988281679	12.1433750233193	24.7705489986261	23.708272737096	35.6163084374056	30.9761602423683	57.1263274025238	62.159257174022	78.0123574841487	78.9131590923156	36.5291386332912	32.4121445340531	29.4715712036928	37.0795196917338	76.7636751096571	71.6211463373093	27.4703009273996	26.043229891501	27.6280669022317	23.5241732923522	35.1818705278398	34.0907548340927	6.72550338652969	7.7637181929298	24.7410553739708	39.6309606256245	23.9029409649741
AIM22	9.24238311152576	6.0532225276527	4.86885250146569	4.96291519673158	9.07731798075506	9.74300975049794	15.4026929471053	15.6617564895562	5.36530648477875	8.32655107518015	33.5505622881164	37.3183147420944	9.27028902560093	12.2421772238946	10.0087243065729	20.0834990490386	13.6337844282427	8.51914288962895	18.8745853768391	27.9711451148488	28.830680500153	31.3572699512655	6.83655868196566	6.40798635723006	19.9912737692587	19.0923832660192	15.7469435217178	19.0837981237206	31.9065896850939	37.8854358623659	24.5258189077954	19.2101765997509	14.7232470948494	19.9582391772115	14.6053194423562	21.3288121262768	31.3182683043003	31.3462421196664	16.6174072666385	20.0582765565433	15.7316178203923	21.0490049490152	27.6141704460178	21.7452930594652	3.76116483072972	3.87730774741824	22.1379129185477	15.7604986669813	17.4271975573784
AIM23	5.6875482192201	5.89931784557799	5.76187229852569	5.87320193477452	10.7422531226072	11.5300375811696	27.341697530931	22.6531450777044	6.34938666745353	8.33781255388623	56.720401181681	56.3080064752083	6.43104298357305	6.65647094405145	14.8055805221689	17.8253521887539	8.31168819221901	7.36739055854386	25.2754807003553	52.1349001513093	45.7062158198758	70.351664212022	4.41301098710776	7.25359880819272	7.20025749221882	7.53141911258558	18.6352186500584	18.2823648124821	48.5470096713464	41.0185591839442	52.8387834427825	45.4672810933834	22.9993333161498	19.1903760102168	24.0057733461941	22.4362851834973	53.909191433099	52.7582241666148	15.5683674720417	24.4354590665665	11.9681305355378	16.8140818452767	13.0716318504694	17.155871189447	6.67654036893695	4.58847137069334	12.7022149777194	17.7186544871736	17.8113224389394
AIM24	12.759646939389	13.0342379854584	12.7305407128963	8.52741412784763	16.7090243584705	15.8843958129669	21.4790977755946	20.9303613062388	14.4294477020295	13.3977727493518	84.5916472037144	79.0364328114148	16.3822008510343	15.226156130517	20.9357466098884	22.7552799998854	14.259270529261	17.1345672685517	68.0527331802575	87.0316930567194	60.8756309142517	71.0577405353846	12.0253446957917	14.5694626811198	25.4537643766561	27.3639268777498	53.3294564173765	56.0762071894542	97.3868166297609	89.363962013289	42.751638644122	52.6724693739756	40.0366403489635	39.7908642702665	56.8583948406749	64.4431804512931	111.664794560925	93.9814267549609	45.6219667626229	40.7229991702435	38.1952914865503	46.2308285036102	72.7804115716346	52.4350940732046	9.83427524913764	11.8276435190484	43.5005374672775	41.2088472941172	29.8255405224507
AIM25	8.26726340876436	7.4941992665597	9.60694821177353	7.4610046837624	17.194484504623	13.5701873879542	29.2661740803154	27.4693364647438	13.611258881138	14.3231897012693	60.6835878260233	61.3622264205532	11.7739578672078	12.6218679453675	25.2344155775366	25.3177594560211	9.2389145459564	8.62027792499713	53.5767912921122	47.8324908206802	60.1073049117011	73.9030673656073	8.17548950005943	10.2616988935797	27.4405742863723	24.1845373653762	35.5098437571736	25.1034764241444	64.2411043913384	60.4390902068167	45.4977921291212	49.1734779111715	28.6638139460831	27.0742105821913	39.4919370411083	31.9533340119187	66.4771521032122	75.1370446671674	30.9670818820011	33.36971870042	34.7362042532742	23.5352967011958	58.1193359939074	33.3719075641986	8.90559820087645	9.77565982729867	32.6507143933904	35.2441888847448	26.0503312324682
AIM26	0	0	0	0	0	1.91532629940158	0	0	2.56150437556235	0	4.00442671945027	24.9431383490596	0	0	0	5.59314365724514	0	0	0	4.67389869452898	29.0869540400719	30.5649434990859	0	0	0	0	0	0	0	10.7754105852123	12.6098067488539	45.1129913689093	0	0	5.42333705286469	0	19.0297910765154	0	0	0	0	0	7.38279887762848	0	0	0	0	0	0
AIM29	51.7411814738236	71.9829859256427	66.2497373348452	77.1767586391923	69.1678116813363	79.0973597590082	126.41467385727	175.898095122211	80.4545419174733	68.4771288399214	305.121920413024	181.352098888191	79.5363631173472	70.7471771029348	139.429604020816	143.143419499898	78.7024350564873	71.3345548540688	181.514468785141	195.736885578842	222.054066785288	236.19427749414	64.029495831624	89.9001791022103	152.060234663343	134.704609749182	151.590106212495	180.179994343984	255.679657067196	225.630160683344	100.237905033035	90.8305853122697	178.586163853198	118.811649493191	176.650615161141	168.142041941977	221.373538140501	219.355378662627	172.274973041787	160.547129776374	152.898556632964	165.70940918007	180.356403257253	157.336012836582	67.2621226165513	62.8071447094889	182.561901042305	143.98820061112	172.457647662708
AIM3	2.48633060558531	2.39442381344253	2.57686608455232	3.84085580650615	4.51925156247045	3.56727948671684	18.8626870542612	10.4025119507282	5.01112621253346	3.58947638447052	43.1073197805334	33.363763227829	4.65750710067182	4.24689078498614	7.48414460743213	9.0666190420562	4.32195228293469	3.79497598022922	12.8041855418769	19.8555531240176	43.2889597064354	37.5867550616326	5.43692100569341	3.85151891618287	10.3916324358165	6.34600059846884	11.07964518928	14.4790156256153	24.5718143981289	34.6330003576755	34.4658376177122	36.1087137804995	9.84636216913746	9.78787380703962	14.5106608781547	13.0596555343474	35.9960016661	32.7916968438141	10.7627241599076	9.17034080777619	8.95680626123681	8.65228060629371	10.7292751305946	15.345256459962	1.0231017466664	1.44861220737872	10.0248722937002	9.71560102132236	7.39853772269999
AIM32	6.73664984059767	4.99107837913123	5.68724297658067	5.46585947187075	5.59843524385437	8.83676878922896	13.1938972108089	20.7335491481889	9.13213674204042	5.83570391034459	21.8344214988574	20.923697423293	6.27306569202641	8.34807424854619	15.1983758776741	14.0755702323768	6.94929600287094	4.5928287830991	18.7981283589255	20.5838778522926	19.062299815113	20.1454333135914	3.04907390772863	5.07682451934875	4.87337284268707	4.95588340079942	15.7661210531795	11.4642096465599	22.818171748846	19.2079335769488	18.5112143227569	21.8326988906303	19.8121379736412	10.4908252868071	18.1976006580332	24.9138683013605	30.9288569287559	34.1741421557835	14.5579402737176	9.09631121843446	13.3881640427471	22.8660032898334	23.2241801040351	22.8603754466015	8.4352595551484	7.24645921394462	22.5678581683574	19.8823842543368	18.8759961915219
AIM33	4.12871932473433	3.47948209840011	2.26559962093995	3.46407664735558	4.05496315585297	2.40019055194031	3.58365009525292	1.21463974012172	2.67495391199686	1.34119977750858	17.5634769374061	14.3263143939873	1.33874130468319	1.38566684388511	0	0	3.4604761609441	2.28703476756975	33.9758343089078	27.3330983903747	9.11258009688073	6.38374609344847	0.867611643533809	3.50037094948339	1.2133709209761	0	13.6081946996165	7.61160607366228	21.8160462423492	19.1295208400232	1.75577471905007	2.17435901104711	12.3320357969437	8.70669543983659	15.8579075311758	11.578993618776	15.898110816663	14.5862758739727	9.66570780132585	10.7062514086244	7.0589120231267	8.08063183577061	27.7552017785157	16.0212707077497	1.05010482555183	4.05948438715664	5.61894700173043	5.50033993716849	5.52912661521036
AIM34	11.5840823987353	10.2274202688277	10.594520694405	11.1077797257252	18.9620111003947	14.9651527046581	4.46879848028603	9.08792661219758	12.0083806632131	9.19859595633779	17.2084112034649	14.6167478528149	16.6940593165472	8.63960398406933	21.7787451724626	13.1104240210652	11.8667617586583	13.68925127328	33.7212569869276	40.170753777285	2.84083392332806	10.2349534582408	8.92573015015371	16.7323721655762	15.887230827841	12.9249879997328	17.6220680603545	45.0853836348063	27.2045263949768	18.9432158952193	6.56832913332037	10.8456761042762	26.1426100867249	39.0859189161474	38.1370092635457	34.0347628032248	14.8686523778416	21.826849988966	32.5433130588024	32.3497373914457	24.9402702354993	35.7257657601241	34.6106789097899	33.1222064699521	9.82105979144198	7.59326955774291	28.0271493223607	39.0957859603568	47.5739394559977
AIM36	10.7615180036309	7.77370026131767	13.2869955946489	12.2538405212927	19.1568956559169	22.4177864733811	34.2496794128413	23.7448490632829	10.4584370720789	15.7313543519059	40.3295281878464	40.7364931421422	13.9577974199021	13.2431094100024	18.2090785260597	18.2692143483662	11.274654266279	15.4990684326483	38.8572287259005	67.4275010094963	53.4420289235322	42.7867413225855	10.7418395824898	17.740706235578	6.32535000023838	14.1513755141317	36.8342152334964	34.7196118385398	53.3097387855616	61.5933044478965	45.764470675691	49.1182464332116	28.92924881879	35.1758205416891	36.9052053940734	38.8039453935046	62.1579170496766	50.6923484074161	25.1937000478785	35.4192265254925	28.6209183256612	40.209706309012	46.2199424465842	54.9468770689996	6.15850455405443	9.40544254554611	28.0711573659206	31.5407301581947	34.5880256430475
AIM39	4.62573365553778	7.05415802720479	4.65362686764209	4.80515201608651	12.1149659829764	9.26253842826196	28.5514740550048	37.1968820636784	7.99191048452288	7.0124014259721	83.7084822536144	96.3055510482721	7.33285308654357	6.20988260758731	18.2629353764958	14.8331236780923	6.03095481558582	7.51621314600382	47.1291356467554	48.1226128970589	101.528219084937	87.1886786058999	5.50832219947966	6.39102798594064	12.6880686982142	15.4835020673541	25.0196806282849	35.0591891962528	43.4529281371844	58.8337869439987	89.8324874709702	105.023129323524	19.0361897738985	26.6631401533516	32.1496291623708	37.0654716659694	74.2166782085348	76.989709473004	23.8243574753568	29.5264169797594	22.8473030550485	26.3370840070391	21.8826453161577	22.0437597273564	1.96085999162382	1.68451194076981	16.7876016833237	32.0448554804345	18.1711222593103
AIM4	20.2928428426849	2.17166823187378	17.3220431122407	12.9722926830945	28.7883381775879	20.9725790072027	20.8756872160072	37.1468784740863	21.0360877963339	15.6256545079102	95.0038662915375	96.7316623675114	17.5466606556127	14.1257551035385	25.4345008333833	30.6221850166597	12.5987810054393	13.9886799801911	48.4696780360166	63.9735200449634	63.035871561964	95.6232610956649	11.3716171238367	20.3906275203976	21.2045565334119	21.5636431175633	54.8803257583172	27.7122441452483	115.169601799131	78.6590631356253	46.0252942044433	34.8320034918684	21.55119587858	49.4506870356088	34.6411374566349	28.9074777126977	69.4577980451246	110.459261304334	8.44574805489743	46.775094359857	30.8399961081058	38.5131765847262	101.050863521072	36.8400178679654	11.4695995295854	25.6183292727352	32.7316891935407	24.0306560965732	33.8188712288895
AIM41	19.2911123597206	23.7413362568442	19.995571937598	21.5808724466732	32.6300940749385	33.2287387198253	101.706565338647	90.8053691915441	26.663548036908	22.2814706657803	494.990814838005	524.692392590278	15.7537789200851	26.8568747668078	60.4471443237836	65.4988206127126	16.7676122531799	18.0475017421962	207.346403302638	283.804464808868	439.970660641415	458.302888789642	19.8188483714015	23.4224074542518	42.8353513058914	38.9484482063457	67.3873882684596	86.9360608564052	417.173928506272	369.208463263323	329.972790461912	307.043610604157	56.3402614574595	79.5544789243934	117.611006866133	161.447852273359	439.50653405577	440.220161900568	88.3170877113474	73.5398551353158	60.2639904977648	77.8003745244553	169.710451440013	189.115504916874	8.72273373548223	9.36677448033025	66.1214186602391	70.8175235523574	73.4843010698413
AIM44	8.78229802671823	7.0488596692973	7.228849330223	10.0001565120042	11.1411966541167	13.0474084113193	13.9752785591504	14.2103386681761	9.86261798046704	11.5701109608492	15.4183631179239	9.696260340651	12.6563390881416	13.2636822249351	15.685636968306	15.737463426	15.7440410778784	15.0809325145216	20.4030072666587	21.4567706330706	5.11511475062546	4.84964998502744	11.6883014866616	13.0990340859826	24.0892436850939	22.747403362621	24.4931265123558	24.2863148215684	22.5582017554268	18.3507714823595	4.97967764079014	7.70855809191726	26.231836382502	18.828875513176	16.0627563452325	21.1114952755382	21.8403485253971	18.6161241106276	25.0148482645729	27.1531856244445	19.1861106897296	20.0532499818755	16.39967686875	20.0290652249544	15.0775207483767	15.1913235524891	25.5644058616646	27.2998220892321	23.5222336539935
AIM45	39.7120226677978	29.0160786262321	30.0576257465899	30.6382608234995	50.2104792739993	57.6713272540419	50.7133627186425	26.8575519884693	37.3809273497679	36.7733849778391	130.191626137441	108.279969431784	37.4952514486057	34.7243220214556	37.0729525549279	27.8965540620083	44.3793332235832	35.1966881254296	141.052121662023	147.640585792789	110.149396987542	90.3388177193255	28.7762126303406	34.7432874083661	41.8539209861536	47.1463451628072	104.620111537345	131.277425356247	192.954274433272	182.130678275044	70.6575543335849	64.1044373459177	106.163263298819	98.5693939916616	132.242419540387	120.699415800565	150.279479465202	153.95187751851	111.135975383051	109.260623431314	96.4249163847166	109.80378595911	132.288567597677	126.040023706661	30.1851686895844	32.3140875198208	112.646722311785	125.512704170908	112.476268472887
AIM46	10.0901018526662	8.75475430357879	0.188090323519953	12.0246283621792	18.577417303459	9.08294084264796	36.572396772349	28.7851534187816	13.6215855630381	15.0122849459036	74.9333964466534	121.260989517887	11.0706157315956	12.6339814489853	26.9719932703469	34.4208623761196	19.6995394790999	32.8880375348915	39.6298218027664	55.0565798210762	149.334826870585	146.453955292341	16.8753183141032	8.93616172279275	12.4351565683112	10.0313572643273	35.7932866037922	37.1809120461252	78.3365160695913	69.1758360271673	156.699793518349	156.66181710461	16.2231571555378	40.7725150760811	27.0265450086757	34.4257254680864	134.207349399108	86.3531230801674	21.7675895084236	35.9505040765486	20.4335273803808	17.2642126210746	27.3649071347596	53.0351716613022	3.50037473547486	14.2035703992785	41.2575141658823	12.1223231744901	19.031947978449
AIM6	23.8781394258723	20.3590411806329	21.9099473121342	24.7730593571724	34.2164062630607	37.6236960833592	66.1414998547991	73.7027457201194	28.4047428842504	34.5874162415326	145.903477695114	140.274089133487	22.3391182246765	23.1221175943934	59.1696944309375	83.2883395275594	33.6836660205557	29.836443536228	77.8364773441331	66.6374914472249	138.810609267449	150.792429513913	24.3485728483521	25.3698640656596	72.705380705323	66.6365666851379	62.7238827068681	65.4308745425911	111.003676578834	127.17071955791	138.499695826109	123.691069516348	91.6658602472333	88.4920207058365	58.4217296002803	78.4154690333456	107.772679495176	110.634586001333	68.1807013784129	64.96435428058	60.0844352540338	74.6627337280091	79.5293055246954	69.7134131264018	19.5139397700235	17.4480320768283	68.9000598590709	75.9287230969611	64.5835400434832
AIM7	49.3590476244875	74.2814640464633	60.9426152558143	66.5570832029689	62.1118720671727	92.0615718040797	264.197497370868	235.968909870184	71.9534401903071	86.8516848981552	459.941893150195	548.851461009651	61.3518151779982	99.394606098089	191.395773984717	167.588118252972	72.3978171141715	72.4555485678635	172.006736252105	230.489295301382	485.698021346852	577.838147964156	66.1240012647325	65.0959596828927	206.709628743698	171.118735107121	162.687433192622	174.411968704961	304.281296775065	228.694963339133	498.523740557226	409.415928343212	140.059104199375	96.2825308810723	152.343244718983	150.787843853069	276.186270561646	374.917422076566	112.665607049943	147.686047859526	138.305825375485	131.733691432064	138.25663672029	156.252728925691	51.7856064404282	36.3987699418611	162.339538237983	157.817100313576	132.202184312725
AIM9	21.8994872114315	21.3098945828213	22.795481965892	27.4935972003391	27.2733825930837	25.5496822613384	75.2496883275184	60.0433086683121	26.6802146924143	29.1404168042211	147.081030961914	140.157363499645	24.4019285734582	27.6819165785321	65.7058127885967	72.5663833797037	29.5193662077057	26.2127451036099	67.0355015950165	82.8456283480536	125.570943202735	119.285473855216	26.3783841524753	31.4761995266204	62.634443201072	55.2744972735503	59.5304764929856	56.0512547874074	96.6292636993995	87.1297633701495	101.002560351404	113.826238601966	57.1844383875659	56.7517564429038	53.5155242571663	64.4022579414576	106.929898673853	108.475606782349	57.0827471744036	46.835673884615	51.8098920377101	47.8824448412446	56.6616785389378	59.3889936843222	14.7000953780185	14.404246862096	59.4028573434249	51.0109997808032	57.5664635076272
AIP1	18.4569705472551	23.5542537621583	24.0544075515598	26.7682550452056	30.136795020317	38.2697493137765	54.4690358502906	44.5253638161462	34.4393457093347	32.1770646588268	110.295989528676	99.560062538073	29.9235227483026	28.9075384315072	63.5014605501217	63.7111606351109	39.7054394974741	31.6942406299817	81.8323593923374	76.3684126623791	113.044762457844	112.520866977887	32.3861450277216	30.2531156669568	60.7518052705006	61.7802769731196	65.5134389545921	66.3526943243683	94.6817983613485	95.073949630228	89.4786842575628	87.8060756519933	76.0785072352566	61.1083719013429	60.7639077968422	58.4181043576728	103.496816008019	91.2890842815043	59.629195570529	62.2195648911404	60.6577931210913	68.6345806995191	68.9316400091876	69.7365500774011	24.4107985026111	23.3902046925435	62.3783345189064	59.5049854414538	58.8274465350203
AIR1	22.8711015980622	23.6907495539655	22.2590837144121	25.2408469996706	16.9529175703236	20.7382797383857	3.99531490856539	3.04688539248189	23.2614462175858	25.7933867908916	10.4898656132759	7.62299971418449	30.2238124492979	28.1933596350781	21.4183640836611	14.6516551708475	23.6301001798121	23.7127303018879	33.6270777471639	35.098300804679	4.44471677217072	2.28762545964527	20.6755306680018	26.3417784162256	16.2330504539536	23.111100785364	25.3829853399044	42.4299631999229	14.4412376704464	13.1725430610491	0.7340490884788	3.03016751899424	29.5596566414688	33.4886151423702	30.3077971592823	36.6527651003595	13.29328516037	12.1963517092861	29.9034453142057	41.3174052502328	25.5768709286124	27.6408314737631	39.9687507157663	30.3178893578042	35.5609738372804	32.8121596796443	31.3219915363795	35.8733077160971	30.5130753098058
AIR2	7.30335084349103	11.4306016587914	11.0211072293086	6.56535602679036	10.3110553607445	10.9681652893817	19.0175687422429	18.2631337100051	14.1953393316624	12.257794992613	32.5479065343603	39.1651527411949	12.2353246244052	12.2556718395638	24.7152865280668	22.7305069962764	13.2627694944174	10.1139421102584	20.2379391394951	18.9946768693427	38.9551855735966	37.9099302754869	10.7431334650695	11.3518156231332	26.8294026231153	25.3193299005728	24.9976718735154	20.1965451713963	28.1391496241015	31.8480534903208	20.1878512197868	25.0007006291475	25.4501178594396	26.1824502783987	26.0477099393578	18.2878420968869	36.9107353164377	44.7233821522664	14.5331533003614	27.6794194012817	15.9551945716594	22.7403927201563	15.0017884336072	23.1197465998554	13.4672349500382	10.7713870421813	23.1920255837448	27.2430688944667	14.670826367488
AKL1	6.92245628084588	5.61461941401554	5.46473209942434	6.28846915191321	8.94581795408769	9.31946987832922	26.4236748842181	18.5790020337506	9.56798916336126	8.41633243799733	48.809518631932	52.7147396243981	7.14077838378714	8.6953663831459	13.6995802478708	18.6930078727315	11.2647621142955	9.68738558207503	24.3120145043753	36.2952084277677	62.1869847819672	70.6045409337867	7.4521035149358	7.32191039005344	16.5608469073697	13.7053011372499	19.4601195994524	23.882346075635	42.3536757224617	48.1933578102426	73.3378513788608	64.8119191503176	22.4420696844403	19.8739979858526	21.3240442618161	22.5768265195146	55.88363035964	47.5967591308618	18.8786953048417	16.0855179642646	16.4265856880341	16.9410041376948	24.6741235278744	22.8193221899565	5.93067715213244	5.09486109023016	20.4949459589774	26.1458215066926	13.271381473197
AKR1	28.2967878911294	32.1456420302562	21.6989417887777	32.8728396131835	32.9576025889798	38.3835542978886	57.099346210289	40.1294817478626	42.1192962698632	41.3251109701455	148.152527302392	162.959653314901	46.582266888954	42.6953526799608	65.4763634849636	69.3879319469633	49.2578819503096	48.5509570048926	94.069673324499	90.9207338893987	173.217418667903	164.750729930929	44.5211792793521	43.3329977614832	73.7779553848109	83.9610888163621	66.2244499399849	82.933033324249	92.6511869699651	125.767788879469	157.052095445137	173.732684479463	63.2812124062012	64.8745790100876	82.011253770958	93.6026064521573	111.754069367294	126.114883481574	62.8481971770523	56.1545619782571	59.2682324359251	60.6745224181002	78.0406741737367	76.1662494345957	25.8354602859599	23.7798050780527	67.4752661093915	69.2087581416227	57.1332361781681
AKR2	6.85901499594647	9.10590928146662	6.30699951534019	6.75474251016272	5.82617520258083	5.31657502876307	14.1597142961208	8.72599586848295	6.72590911742898	8.18991744506447	7.510501583652	3.74256270183682	7.53372890680382	8.95915878496945	10.4556951921026	13.4274684207882	7.45800139948491	7.22923992480155	11.9550755747263	11.5712984052662	6.81922559357248	7.20667743004701	6.54456371122293	7.12490642507428	15.6903472565378	17.7289446911525	17.6722287902782	17.3159027000287	15.672661515133	13.3383982827598	3.46870772225884	3.90514489219175	12.9936995376043	11.2587992245991	13.4266621772477	15.1512844139259	11.4211791462047	11.177386066076	10.415761615084	11.8329112540347	8.73360456008713	8.97155392145048	13.8467447647364	14.2356320202409	7.54395035278529	6.96682727278656	11.1007489368032	8.29802222461696	7.14980894619267
ALA1	63.0004049973541	65.4619688553101	49.6766971971968	55.5118938928572	44.4554254334861	48.1730995724242	89.6609814656559	80.816556889683	66.3377185908204	63.301929001456	24.1444699080017	24.349406509395	57.4192655361163	63.1148066287079	117.484417051909	121.726532299033	63.7448496785208	59.1068349519796	77.3994090349948	73.8073520221295	26.7242913007566	21.8139250528437	56.8920170296923	60.951704967785	149.120694377368	157.413141334155	104.472140055036	109.868619173561	34.7389137996086	55.0695108051341	23.1711079049451	20.7243273613819	92.6756668281833	105.088255413709	94.6732487043366	98.9170356772159	40.9782687144032	36.093040736042	99.3897041203703	92.382961744027	86.9038003405059	83.2120178646803	94.1158906491409	93.1980116458617	89.7904272726557	91.2733180999933	87.2847534504963	93.759917235879	83.9134197631194
ALB1	108.902766581194	117.295804264284	109.238447885951	99.9336747095576	65.5547628468639	72.6133714657429	29.8145864018629	22.0480523790191	110.463658035259	106.51072691106	22.7722218352445	23.6409572188366	93.1529096604501	84.8894767779227	29.0603916643074	42.4092802267577	103.381281049882	102.74723133528	151.034642098	137.326709003603	15.5072386461533	8.27692096397042	111.225843358937	100.602795649315	107.371582058525	98.5509301787518	114.006952285144	143.922143786846	51.5628094102144	79.149723699453	0	1.64453097681132	108.194096533841	124.458744740362	146.495988661832	140.746559350142	27.0544635783016	50.7472969139852	162.291881817176	140.148588279516	106.777237251734	105.00865230715	150.44303933425	143.494776842606	257.329265624591	237.43762319295	125.367980770172	144.770689548968	127.963894209095
ALD2	1.72800729990588	0.832162615977937	1.5803936110568	1.93311508145021	4.24286887871358	5.35766644669055	5.99951812291707	6.77827805155311	2.38839817918614	2.99380343185919	37.3380800963143	37.0666015607293	2.73929523777218	3.09305798551779	5.84777044675996	8.47466937198135	5.47145588408637	1.78678035845284	15.0906515223814	17.9769079200078	33.4777946330664	32.5707072474401	3.63124185129574	3.25561356087331	6.7711786444109	7.71212166740157	9.93064930011308	9.91112957034699	35.5085383051205	33.9092926248309	30.8638506736333	29.9303220820335	5.96427029796035	5.83047630212744	10.1136689090508	11.0770515503754	36.0420381520711	36.3578414853026	7.55143405620628	8.73212902617825	8.31608001683173	7.78890469817461	14.6282173382559	15.5284536514643	2.93003406312253	1.51025783799727	9.40689267595272	9.82222651248983	5.5539040019184
ALD3	0	1.66432775498345	1.26431400040113	3.03775515520128	3.39430033056087	4.46471721257359	35.3305263982016	31.8578288399842	2.0898463303773	0.997936358903559	249.231848549057	215.131618741935	1.99221320875412	1.80428766130774	5.19802829171007	9.77843001242098	2.25294649941479	2.55254420459632	49.5284011744402	67.5495149668518	172.897772298451	138.934427932678	1.2104192315853	1.30225104901642	4.06270228904527	4.40693293785196	4.08908240403887	8.4952877053916	135.439993704866	137.521068041684	84.2632145402616	123.765908917378	8.25824096214495	5.83047630212744	8.21733480903246	8.30781920196802	118.107237677287	102.561589033768	4.31512012584783	5.97459461586303	4.37689581632954	4.91930132662217	9.46529285415754	12.7050930488785	2.05102384418577	1.00683937651733	2.61302159441374	6.75277717315372	3.70259596682682
ALD4	6.94568517154252	9.54784279150278	5.96501508974866	10.2983190805757	81.4798316696885	106.423876631067	90.7983505697072	43.7215294284496	8.37582495612651	12.4754322414918	1640.09001941414	1666.84205125924	10.4228756244902	12.5984465868287	24.2733689902956	13.9072139007796	13.1228873572372	14.1882016573673	564.484498278931	691.073497355118	1130.20649869046	1208.00879344324	7.79516723892653	13.5219809281413	7.77910498705295	11.7649800203149	162.727497673391	207.103163121187	1248.47802407016	1736.73921033538	944.844742769606	969.813862182228	189.798222636921	193.507167393317	274.066477157618	344.064247022535	1950.8943619358	1805.92498814621	199.362728347056	201.179883351991	144.594009407244	176.711090153294	371.690873870488	460.158953322327	29.9082010512883	16.4091467866191	204.520047770796	258.82641361027	156.222679653987
ALD5	90.4282694532853	85.4829495711694	65.2437962661279	91.2596021522221	58.1125043310616	65.1173006801833	118.865923250723	85.3940611914277	96.9229694280168	92.8408723202884	44.7777485085682	36.6253033579472	90.2573973546321	99.6656493381825	71.7821220258801	86.5493676389964	89.8278481435896	88.0620382551932	147.367459367216	134.618985121684	25.8723131632216	33.5367705182404	83.2835248483332	81.8197823544854	76.7738180854627	81.1439823207694	144.355529371644	147.502399578162	90.9433054448495	111.971529264076	33.2332312599417	39.5882469990359	135.606338037662	150.202985744579	159.879783386676	162.80989998878	59.1089825431905	78.8820070647523	158.383802351351	163.454621559971	119.189520888867	147.387790623029	143.428570721663	167.813492108349	51.9623188824123	61.7143302268022	165.103243373546	172.525162732538	160.270993040058
ALD6	339.788559682298	351.826103222779	300.34304083482	381.915106560793	314.776718575335	327.992914133668	751.111537228836	485.860001433711	394.274376072814	402.11664015371	575.885253313207	792.82435222522	388.140352506725	432.788725216909	347.566982552762	358.962323688324	430.658094497227	457.478879558185	482.864685804052	424.884643581422	834.876747633588	828.353656524887	403.791706782755	438.799966364075	330.520499245917	351.274548859817	473.492717597699	495.63748513063	249.574273165836	318.589423039159	1247.22888944771	1150.62585506975	626.438053950512	697.152628527978	538.54510356413	503.624777573629	298.049270903585	347.110656435664	560.719894831014	575.906817773553	593.348038317731	612.86834593594	584.800111135523	619.99909616322	304.50743691936	210.913685870014	653.047360579332	703.529207455104	574.131754154172
ALE1	22.674976692021	24.9277647437099	27.6506080027856	32.2845401825585	24.0696017803877	26.9851887937565	50.8934577046677	44.7417176069102	43.2120419390199	37.8958636949844	64.9556893721254	54.3322682331451	36.0441741192801	41.8171956005919	72.342087588318	67.3970832932959	38.6498817229444	41.208360464849	60.6213744774839	48.5217464333172	51.8999979563144	56.2574039145264	34.0766422267585	41.0805998235559	74.8505300642988	77.5421243792955	55.7478553152502	53.4856511741096	50.830323475191	45.9440874556025	29.9997100952572	40.5291778417141	49.2567087222335	62.9837214999031	53.788486572671	60.1970730464334	56.0037516102998	66.4601515210502	45.899085124745	51.9004367123485	55.6935360039439	56.0745731099993	54.0613434191994	48.274832981466	20.5056054365736	22.6201556907671	50.2892982814552	50.2857189731499	54.9655917791459
ALF1	11.495289285201	14.3280212956402	8.90538816327487	10.3742351975779	7.96940869227366	7.86198421539171	12.5210346360979	12.7316610902367	10.5143894155642	11.7151836439301	18.6289312469299	17.0643463318974	6.43154116003553	18.7605369628029	21.3575418079361	24.4892401130984	12.846292125578	8.39029001282421	24.5292314667799	10.2321644116843	21.8890989752175	31.0668017755075	13.0728350642483	9.17259460410321	22.2570510476673	24.5740355037731	24.6874659537427	18.2837247775226	21.437947263529	19.1665693643284	5.75117882614505	21.8415798328858	18.3121744840332	22.8154611231809	13.3569107889488	20.5893973440844	6.50941254573738	15.2890524946639	15.1971136933291	22.6600505415183	15.4146535898792	24.0623468985252	26.2640383410028	23.2011412069606	10.3190445670621	5.90983472868818	22.086223471021	33.1508035082878	26.0797826495289
ALG1	16.2180115821278	18.1705922923578	20.3418208958721	20.3117003416853	20.4793191004029	23.602574544618	40.6029225595924	21.0324211779351	21.9585401132995	26.9511740540553	56.855832662748	47.6096247924695	26.0431986055708	26.3635875791046	34.3488339078062	40.4557161946837	28.1108303872489	30.5080456647065	36.9087422803393	46.3275903900851	51.1358762000157	51.4679559011328	23.369631850853	24.1948148629816	37.3518010130064	41.1497028369826	47.6643388365428	52.0694545356654	37.3097281789757	41.8562010883082	54.6118029408057	47.4118581968026	43.2349489067545	50.8126139886093	38.5009025386952	40.8424360886699	47.1557522002198	44.2780842915742	56.4096431423757	40.1407957698161	45.2705181897862	34.3915863258092	52.4113651575751	47.0478626723176	12.458936035009	13.8850741083095	36.0355463886039	54.3234983730725	40.4237787010688
ALG11	14.9825357580302	16.9620368536594	15.2892825335477	13.106256362964	14.4567956170975	20.1704710542968	18.2520726952328	15.4658885700618	17.7111177083081	17.5327111325035	41.3190071719686	33.1664592532063	16.1369042962029	18.1140038837262	24.313477092776	27.9635662879324	17.6246457919443	19.1030602986755	33.9024906542922	34.8028791321729	35.5822671907891	31.119912069883	17.0126547079206	16.0451784633255	21.0115420671168	26.6463841013793	35.1874582352468	42.643832484765	37.9633793375062	36.1061771628458	23.6974089509713	26.2092072769735	38.9415612122888	31.041078990274	35.1911850441998	36.2266823710869	34.4128395588185	35.1639541903739	44.3058886417355	32.717173631585	33.9547873335593	37.4143202101447	28.2722774071853	33.9279062943668	17.6494969222468	16.081032550495	33.864696278647	25.212635207995	35.482323450518
ALG12	14.8896695658933	16.1021133652738	13.4743684993894	15.7803056796953	22.3204240255463	28.7520328906048	12.6972506531933	9.22200848708098	14.622636941436	21.9497509684555	31.749651402243	24.3910135498451	22.1354194044622	20.5733903961463	16.5013656632461	14.1907772107765	25.9811744575258	21.7628912620981	34.3942224382583	31.622505223528	29.5961624537685	31.850163160534	19.9812438380381	17.126886315573	16.5822004489339	28.9794223495906	38.1483836220498	47.5163507090978	33.5871253971136	38.7301156584438	30.2157452398513	27.8810197101069	52.4324702759418	45.3916573241592	41.2796622992653	38.0952530328754	32.690701894756	39.375710196942	43.0527694331728	31.6807051466694	36.1262337510872	42.3879530926986	32.7798625596057	35.4248076985072	19.1346409439767	14.3832198748562	42.6609706823204	54.0103890640762	41.4192466493978
ALG13	14.9876703056018	14.4353508886805	13.3646678383518	18.8624546014546	20.2400000298073	15.2476670621638	71.5498908197397	92.5949065234997	12.6234965303862	12.1717674560312	177.609999280653	200.933137743719	17.8192185335299	15.0903755519606	31.6999236435421	53.007721681872	15.7023400299957	19.9252685466051	47.8241940030275	67.3295201043472	176.424392978059	205.252430206331	10.2359578995915	17.6483210785535	39.6420173217832	30.45893975859	37.9995040115096	52.9594629612786	85.7944091051574	53.1028184423277	223.078180556536	172.33418553889	28.3522699157382	41.0881010776345	26.7270941092744	36.0284219726897	117.22714798166	88.2494511247202	50.8769152784601	35.8753898045792	21.3539003686123	45.3336626176833	39.182331740606	50.5064808936231	5.7179892975323	1.63737910239439	30.5960455184317	29.9502758984765	30.1069372530356
ALG14	16.1864637369521	20.1665846372123	0.000953394030069219	12.8120561715099	8.9484840249921	0.0469426736754976	19.397569162756	52.5185484578476	16.6458637150945	24.4848537689079	29.3904954223654	27.092647171826	13.629416101717	8.40852667396409	48.6651046848465	34.0001216865424	26.5998189803758	22.1234571066082	54.711731958965	45.0219794231706	13.4440666251413	17.0852540119427	13.7683893710248	8.16403554741761	30.648845954373	15.584071208523	27.5734440518524	56.6805046987398	44.4929928798684	33.3932690927513	0.0423533973467675	8.35656751896559	38.573703100657	32.5166013959221	46.2178346753973	70.3299140303201	28.9652109265671	2.50344858534875	31.5067769152098	29.3380618414562	49.7386777640717	31.8214492560246	18.8828293781874	30.7707210167216	11.7275794413072	1.90551858051495	22.275378043704	24.8993552982128	35.5001651792834
ALG2	9.85941749181597	8.9374971908357	10.5023668084675	9.73207772384035	12.2465705614439	8.99088332496545	13.4240031891072	12.9673101906135	10.5211446712844	12.308824450008	23.0269512891925	19.0267176062143	14.5429333515558	11.6787985995813	17.0097961836775	19.6914850343534	14.5828979086742	14.3926061188472	18.7009555006061	19.1976021024597	16.6407158011192	16.3974169631329	10.2374894340736	14.6418802699593	23.8621419139165	26.0688675152589	16.4689054651875	17.1074732753485	21.9625064755524	15.8067728133986	11.3452730289682	13.4391607075561	20.7876431881907	23.4824120938207	20.3665017215579	13.9416272388623	15.6326182021986	20.7627432743446	19.5516891725437	26.37660709713	17.1873748512891	22.289160097256	24.2593324188493	20.8470454310533	12.0958147520035	9.88422974391045	20.5218308728613	22.2520860369712	24.853829720585
ALG3	18.7441596167181	11.7559965251386	11.9006670950892	15.6009387104352	15.8490335261489	13.7263000264651	26.9444726412417	21.7584995732773	21.4915969043814	18.3141561473791	5.76430964406828	4.89595002677032	15.3963096317851	16.4904491209322	24.3543591313995	23.9143562899542	16.8154144486931	18.1708285936512	24.9785137396257	23.937104867191	5.33280814846732	11.3542884633332	18.6808390338992	12.7407990387443	32.2827347161262	31.4945287859605	35.8311608929465	35.4866912502778	10.7874921386773	14.3598221141434	6.50267286514632	5.44870753842734	24.8051773706222	30.8732612323402	22.8983359196644	23.2936423037381	18.5165275628809	12.6964637281206	31.8109406193717	29.9951625773276	17.2430229124663	22.5711280176591	25.6796563185773	23.56284887425	19.4931798556357	20.5342638352303	24.7097429841894	24.8199690658556	28.2630071497264
ALG5	27.9398380936019	27.3662708949428	27.0258095425733	30.4237372215985	30.6966699102425	31.9346051982049	25.2104811732301	40.123569993428	29.4540223588143	30.7666985161124	23.7904326048612	19.1210394490444	40.5377258108555	32.6345268486323	44.8719525956787	35.3729965047275	43.9247088734421	41.5516172775759	56.6256121740219	34.0379502166912	16.723193220239	14.2257685584231	33.8347654016542	33.5466394840459	62.3489130466696	47.100791536303	62.4338158660955	55.8748141056355	29.1931952216792	23.7482368700783	16.9163475036206	12.6360840415744	71.6663470524602	60.7179048408039	50.9287361312745	45.5348431642284	15.4997053374919	23.1993535173508	55.8753461611424	61.210810047363	64.7720929095591	69.4284353023658	59.4251271413564	55.7089133140925	36.6154255863692	36.4218333817741	58.4330800926136	66.6213128892921	59.866790058595
ALG6	29.6863248277007	25.7840803026633	26.1806768937613	27.7030731880777	20.3051096633649	23.0104700891118	39.877740082531	27.4481937318702	30.2239553980655	26.4048371033944	73.0218006958548	48.8290938875295	23.6062023805259	27.2802431569072	36.4770672503141	36.5975335800903	29.324544124629	30.7741135519139	56.2657792236218	55.6502578337847	60.06112003008	60.4199155077015	25.3988094165698	25.9674849444329	47.3609307891517	50.1909271552048	44.0843905121943	55.3806737646277	59.2900340689081	70.5063959323238	34.2661664972744	38.3407240768064	43.4904994293303	57.6838927023181	55.2655781177562	52.6718510362901	70.9341634997119	77.9093244545814	45.1738733665061	40.1820679438007	56.7975897871984	55.8374136384284	61.7705459193898	44.1730075223795	25.6177343545754	24.0921920110021	59.6402340632329	57.0631195263973	63.0406074432055
ALG7	19.2472218521131	15.9809575811225	16.3890211101739	21.0014315789032	13.6887319550779	18.5200671205821	29.1879482068983	21.0876386065077	17.5441466130285	22.7099148932449	23.6624572470993	19.2612984768058	18.0772462646247	18.1168524273323	21.71154930497	26.2901123592916	19.6550544123956	16.470508603249	31.6554206939812	28.2461078813742	19.0431952255268	21.6967608993611	20.9205233736042	22.0075505700067	47.5925383535032	37.4493242043541	43.0778104973367	49.7589921897421	30.9781870125519	31.1127929918326	9.03179034780497	7.92269856472997	48.634849526695	49.2664751996723	40.7869972303333	37.2269628838875	26.1954267474601	27.5119380182468	49.0993587958436	34.4210473373353	40.8504119117996	39.205398909601	27.7616792092359	41.207147031844	14.1797050850408	10.7311732357798	45.7648446588307	49.5146034210268	43.3740970213979
ALG8	15.6179360200189	15.7587040820412	14.4198065106727	15.9266107761917	13.1477286650836	18.4469481422404	25.82114171046	14.0029346167643	18.50281153033	18.6831883129983	24.9082083313705	11.2609486355836	19.2919942154435	25.0711832038092	17.8972277860028	30.8624581284309	21.332040728597	15.3801273155978	24.3139902926221	21.5698492248622	26.2633698918072	26.721835608756	17.0870925649041	18.8692113180503	25.0622991066494	32.7177948527189	30.1695155671128	33.5156288753232	13.9724786986593	18.3777279355278	21.5064312579865	18.4520534673211	41.0711310907812	46.4232103741647	25.0284924873405	23.439863928434	19.568970933193	26.1577058759094	27.8575836155492	27.6918932515005	32.0238886851133	35.2867059242602	22.9611375310631	22.2774429324495	20.6811786149633	20.3665141132247	33.738273171693	34.87569118727	37.1828161062313
ALG9	27.2034748529212	26.6999393123866	19.0506892040078	23.3522064466051	20.3562877695495	22.2909214262068	31.7827013517072	20.7318659403291	32.4969328350496	29.1759793685561	41.9858159923716	49.0359367311543	26.8824045330896	29.9114342538919	32.7322178816136	43.9825911650519	29.821580335969	30.539622952419	38.9854753448285	43.1245391398711	46.8894638312071	48.528155811532	29.6172363071498	31.0442250937753	40.8111726984378	51.0415216372536	37.3101278457325	51.5848339499408	47.9142374106526	42.9318034068478	43.6299914024992	40.023313383688	43.7482405376109	52.8870187099465	51.1766218343058	50.6541269879071	53.8716826898259	70.2951273646039	49.0077571587517	42.9971447675164	43.7048714744755	41.302948510262	44.8963678075217	41.9073067643926	26.3580025212827	24.0019501684489	56.8850638209665	43.6272271676526	43.8554216309374
ALK1	9.30424453563391	5.97425176455535	7.80864808619113	8.04700744994347	10.9298713280174	18.1005234539623	6.75633266803671	4.29374008888683	9.45591836354504	8.05988829118243	19.5129317970554	19.796918522418	10.4113345364427	7.67400524794409	12.7592478338745	15.2790877895259	15.9024635957223	11.9652483170935	26.2267928049989	23.4653175654165	9.66383097309717	15.1517054252074	8.43421320446685	11.1364189967556	17.5858658784656	13.957992078276	23.3122927158039	21.5255266605063	21.5290999738489	23.0711385710371	4.34464340917809	5.38040411175432	28.4811404698784	22.4679177466019	21.6221396686513	20.1734536247113	28.0997782887021	20.6249017884281	26.9927385740704	22.4167562281212	21.6260461100897	24.4099534248874	19.6228463950979	21.7597091597032	19.4885215333828	14.6691329230544	22.5112078141021	22.9434741551654	25.7997931538889
ALK2	9.13445887122216	9.59764735583319	8.4300926691375	8.16168924371266	6.93238552430943	7.88491896028147	11.5324516974243	10.7492117160039	9.8994396612367	11.5095699287075	6.39222449712733	1.04780083088047	11.1294559071086	6.87457155550677	13.5825337876247	18.3265175587344	13.6880431780446	12.3277731229709	14.7827877901089	16.8851911177301	3.05468167239237	1.46738364319264	8.89961484665718	10.0128917446617	16.1069861971042	19.4571049137692	23.1593532378791	20.9226482451759	12.4322442529294	9.95828479914643	1.05941793330656	2.0408654767839	16.8663344900074	16.4610389497487	14.5805817030243	16.3021841942705	7.19455004853001	11.7349320373756	19.4405884497449	15.5704021843615	14.513079988785	18.0255364999447	8.68376139490422	11.5326428883669	9.50431919521506	8.52773144340982	13.9383342424637	15.487935478093	17.7930786430468
ALO1	26.1679254748937	28.3870878517858	24.184342531732	31.9592214497934	27.3235674571666	36.0828403061065	37.6163473746749	26.5798226915966	36.2635416085172	38.1778240264976	64.7262207497195	68.1219584900462	33.1063168141512	30.322315089193	41.0148369605578	52.9967114580458	36.32315280131	40.0373693788427	67.3546213330585	74.5055430003304	51.0681754699286	53.5414213635046	31.9517701616773	29.2693613921572	38.856589005119	53.2128786522084	63.6918405622637	68.3861377044399	75.6850808133264	75.073058121778	40.7641853738992	34.4286690132529	66.2582718078168	68.3112429968172	67.7108071982676	61.8003192563927	62.5789077223994	66.9519339374218	74.2876607917467	64.6150864744549	60.699517446658	63.5167632532756	57.609032224627	70.2081879246948	37.5513939216349	30.8147185697314	56.4807232510463	70.4564185556036	65.513320274921
ALP1	1.24931935428115	0.962623325825788	0.548445556308124	2.39589801450643	1.96321097256524	3.48613913926595	0.578340413968686	0.588067666990874	0.777045437589394	0.432895192857934	2.83445170211299	3.15276564563559	1.08025137653706	1.78898321338781	2.2548401904054	1.13114535408056	1.3961498984224	1.55017291115204	5.70692065716118	6.14402514727781	1.10295927334854	1.32457939765233	0.630078567089946	1.88300917584092	2.34980542350438	1.4337589374938	7.09520586708079	7.98453213932416	4.84101574265282	5.44795230148536	1.27508776482309	1.05271097205602	5.97057491047633	2.95073465306364	7.12921315157017	7.60810536215339	1.92426515290157	4.70795176876079	3.74370327495955	4.78470862008303	1.13919129113347	6.40183660294299	3.73268422679514	6.53191722019931	1.77942340326799	0.436755305901595	4.5340020344999	3.19558018702115	4.28306027823294
ALR1	26.8178900785519	29.6733273095184	20.3223861766156	26.3275983288302	19.5974508038951	21.5295863531049	31.4061642963099	16.5307433375834	25.9799383064085	26.6883497690652	39.3212803416115	43.5069070300857	26.9155055913744	26.5730850134062	34.9333833242048	37.2167085308991	23.9045037370797	25.6078646145388	41.8215696921673	43.479550457207	43.9230589646763	40.619235397181	26.433492988064	25.503562402492	37.9058666453829	40.6087657153999	41.120046289699	51.0106921872047	45.8293655207613	58.4730617960588	42.631485671648	36.5417345548568	35.0925418423608	52.5144965185727	38.1888568542002	53.7223379716054	51.9402822147138	55.9445658054855	48.4328095412142	46.6163510572905	35.1767474974883	40.4449244309262	48.6479190234326	53.7282123320048	41.7375547070335	39.0643147420201	49.8222262458059	40.8312508880628	37.6243863285778
ALR2	3.99581353566878	3.84855057207041	1.7541444434316	3.9847632862755	4.08141476129669	3.96446756867131	2.58965968917844	2.63321858669498	3.97646466838036	4.84596387579252	15.8001680526833	18.9574980502318	3.86966870172882	3.1470364481946	3.24533732417817	5.78852508368852	3.03650563506328	3.96645819544587	7.51595836315887	7.55808680285391	19.0495634220555	14.6865730100887	3.09002925224138	3.85447186640739	4.13358037471444	4.58572360598811	9.72567941649536	8.64346476588766	12.9497822426714	16.3792322695992	13.3222172928521	10.774379101562	6.36536119760012	7.0107945329283	5.61278973052438	6.65974146630827	16.9250375818709	18.6717443593308	7.48362791353636	6.63147841520885	6.07262397675266	7.50767134250653	5.25297843682863	8.61780234106076	8.61825060538644	6.42581785780584	8.12084428542413	6.13241584880924	6.84946480224284
ALT1	19.2656371044614	29.9210886173829	22.7295149759584	22.3990654643236	47.5404876770858	57.8662146695824	55.1834126281904	53.2776341487826	27.4604744135656	31.70910647099	591.253223321897	551.819806429388	29.3605833456995	31.6827104598537	34.2283730233989	45.7885681513827	25.0285069105134	26.2528891925259	146.892072740564	221.834315346544	522.307113857538	497.462920394557	29.5541265241805	31.5785684677373	51.5232551857561	46.9834933866856	65.4530751368992	84.0588478620961	408.893813387753	475.195128762389	269.956355689706	258.049747255456	60.229886806304	68.254749890186	102.539059107886	125.428714213349	656.534920799693	656.584272840067	68.5558109085365	74.93746870113	58.557981275997	72.3273425599519	161.172020036175	156.207641534	21.3152674146675	19.5740886676178	73.414484982072	74.4314168663268	72.7565595697754
ALT2	20.1142692026217	20.4800455831297	13.2451276565934	11.5723116570887	5.36206976161365	4.90004299531066	27.2690592199009	34.4905712020164	16.3829070805455	14.9350069291185	127.126902351359	121.824535857617	16.3984192625351	18.2590206491266	23.9861476298549	31.8703440267769	11.8813630488615	10.6963091627197	49.4158411167443	64.6784895763507	117.963112301161	103.075395881557	17.8734827099294	15.1584215725678	27.6986778736281	40.6714873039271	28.5585495050175	36.0228722497105	114.381254034202	133.449050128349	105.578481968656	123.080878933287	26.0915854684812	26.6623093723717	44.7773414295976	37.7606657061903	148.266132712601	154.305213881045	17.7594257524024	33.9319639404974	19.2145676173914	23.313563089059	32.6240509079191	46.479405583919	19.0019293937072	16.0727885975048	32.3278287113684	36.1371133979776	21.5493907780553
ALY1	5.963530151195	5.02579523856316	3.92694605631015	6.57608220688541	7.46771687914435	6.35590700961959	7.24674516844372	7.01774516000224	6.6455935565923	7.23235306395836	29.2346238791345	26.3366290476911	6.57454548123761	7.2052903454893	13.1178078964567	13.8360478176847	8.49715123329939	7.79605223924142	11.417421682115	15.7920569816043	31.3700452363533	25.5545838654319	7.89506025523326	7.41544860383227	14.3713252808315	11.4065988130847	11.1886739962813	13.9261011432934	23.8960525483789	27.6307628687774	22.3172761613585	21.7752222306396	9.97501900759924	12.5760301608825	15.0520672006105	16.7248465346613	34.732096926074	26.4059145944578	17.0326716935991	13.7988442826416	10.1959718493041	13.5816297291119	18.2631748012041	16.320686583887	5.61208841718563	5.99386907092442	12.9856267782453	17.4783917137429	9.26407893409121
ALY2	7.09959817206698	5.61636030304228	4.90203589640196	5.11633742919701	3.53377243199143	4.80853567984142	10.1627600614005	8.46809558127613	6.02668477944517	5.37389861062289	21.9157960859627	23.1692852489688	4.29154113603951	6.32946389270714	6.44106078901123	7.61181814930967	4.85278174401481	5.03596338733157	15.6756644605445	18.7741273979411	20.8116372188443	19.7314326952696	4.693017739663	6.07750904210228	7.00734097794929	7.11929047879474	9.31109216949064	10.369201273325	18.5763064665061	29.7567373280145	18.7854493453132	15.2470311717612	10.8978967363162	13.2995850089508	11.1655311403691	20.0858672379887	25.5611092613082	24.545994973573	12.5925536152242	10.7102647343469	8.48733727671405	8.84457916012272	14.6686718373899	14.1312191131671	9.08826013052054	8.12370414016777	10.5497148883499	14.2811055188631	11.0681038750349
AMA1	0.240362489316235	0.926019241767758	0	0	0.23606960064623	0.745240210463318	0	0	0.498332999637351	0	2.33714756074266	0.606575424730219	0.207834791911703	0	0	0	0	0.213032370582752	3.22936002976943	2.27323094731218	1.7683616180215	3.39789028990079	0.404079529642322	0.362281995212712	0.565114620855663	0.459746805273566	1.46258859304742	1.18167362366148	2.54014272413784	0	0.408866403191903	1.01268187109199	1.14870040041233	0.405504196274625	2.11018564386844	1.54079968151778	2.7766396847603	1.35867907526513	0.450168341197539	1.15069098902742	0.730578876294064	0.6842627912825	2.15444645468319	1.17816914019442	0.733612335618815	0.420147175606791	0.872319437982244	2.56172434051451	0.515022860630176
AMD1	13.4425417664153	14.2582595831915	12.6988232510697	12.7266253018117	11.6983793351877	13.848850329967	9.45244696523664	8.81048469227659	17.4626959477471	17.8355856387566	46.6023775797827	45.0880373229035	17.9500452078713	16.4471455034863	24.1850492186591	19.6430400495181	18.0649354068758	14.0254031962716	44.3512372441402	46.9908410077705	44.8169559104297	50.2138357484983	16.5914035080419	19.6197950184542	33.2048061083964	27.339150387103	30.0266189190342	38.0624650369216	58.4424986319404	72.7180202058149	19.6823680148889	20.7901860342879	23.0405270131822	30.7161328563475	37.3463052666355	40.0858582836958	71.418512635761	63.4815797242553	31.231200853652	29.3256964595002	20.6878582412791	26.1580600873489	49.8228071846007	41.7027523873525	23.7166072190572	22.3074743309252	25.9365272093906	28.2907283204817	26.251063245677
AMD2	2.36075388947176	3.28432591547423	2.30302533745107	3.2697687401749	3.86431294823782	7.72614218473785	13.357044796867	12.3470275673394	2.4472187378051	3.40838954893608	23.3797030538322	27.1400277382509	2.94851274613197	4.22565618719537	7.69315289175346	10.0935225997385	3.81075903971409	3.48721437794953	11.6297889824593	12.8999564530145	29.7190130023376	30.1283138147089	2.64583144089808	2.37213022636449	7.4004714323899	10.5361051023274	5.8524056736051	13.5403441031193	12.9361709257926	22.8769989920612	35.6954914451304	31.6805163145118	8.3571378923745	10.6205932758628	9.78705167947	7.98697450918291	26.7661192783263	23.2292460423181	7.36900193230476	10.0459508590013	7.17550572839014	10.454272838955	17.241683976636	15.4287274601057	1.60117168958288	2.0632700559625	8.56759260641119	7.82767585797903	7.86860445268038
AME1	8.36378302898098	10.4248471765711	15.658586621637	17.4550283445593	8.21439969802863	7.24564190449064	13.6651919357763	22.0004299127408	12.750157575139	11.9332724809274	50.2298458446219	40.9718898370562	16.5909091123436	11.0079521937658	14.4294475565704	17.8179953573791	16.494304533108	22.6743930625037	28.4231508669756	31.6401910850235	50.6742128652571	43.4687047067089	8.27094634752145	13.7184224264111	16.193869643744	14.1155276388848	16.9643161247316	21.7684873714314	37.2616882370503	39.6904559013671	24.2697994962265	27.6375421920905	30.565990342643	19.9201894083334	25.9154364564461	22.8649942828041	43.5725679383035	28.7371956708378	21.1928622195382	25.1232020866709	24.6739846521071	25.2106289859872	27.9289735790172	32.1538360823577	11.5122333049867	6.44986272069388	16.0696037847582	23.0713110107091	16.8668667573622
AMF1	0.282214976502955	0.271815852764531	0.619456688805277	1.62366352380449	0.554349327286355	0.6562522419706	0	1.9926225183222	1.75530890212155	1.46682876966059	0.457348961993934	1.42438533816927	1.22011718602551	2.02061296831363	0.636694502188531	1.91639952201338	1.57691564817168	0.500251485293978	0.758331478066307	1.06762212686053	0.415255257123299	1.49607804088726	0.47444033621142	1.48876782219819	0	0.539800719551114	1.71725445861186	1.3874304213926	0.994149644343788	0	0.480059416419895	0.792673989238557	0.899144602618607	2.38055858949902	1.23880724773061	0.452271913999873	1.08670757398057	0	1.05710382326197	0.900704183817329	0	0.803409191292031	0	0.92220920407506	0.86134910152585	0.246653675639892	1.5363127992143	1.20311086209794	0
AMN1	64.7895973434669	64.17043103967	68.5150482113848	76.9652636057888	92.4859996738819	104.912847605376	21.2498691831257	17.903173551102	71.513241149527	77.938182165903	58.2366938434611	43.026888549841	79.1563651823551	98.3639512297077	36.0986124762859	39.1865376663528	89.4060989093219	85.5528134112217	116.297889824593	115.603294737463	69.0868948072873	57.012015256614	72.7600345526106	80.8500897474217	64.137517032738	52.6802816485403	185.680705802884	196.657449032107	65.1427771474759	75.4940037205151	51.7583575053757	43.8369795813545	189.707393473555	165.06178049655	149.684220135088	155.115246572244	56.0573831171113	55.849044074017	176.85560571801	174.548213134954	134.341545633999	168.388471706266	110.503201513789	113.143843172734	98.205281350979	76.1118052703706	160.880604915118	171.649412031749	180.977450086131
AMS1	0.373306293782076	0	0.54626442552985	1.19318532138747	2.3220405921434	3.27937893912341	6.04842083835314	6.73586942425534	0.38697925360454	0.862344203886262	73.8059791813875	75.6796295027096	0.322787903570306	0.779568697430881	2.2458716362753	2.53495389657013	0.695299815555938	0.772003284289645	30.5945421501974	48.9567446782527	45.4077143359847	50.3536907960856	0.418383533589812	0.56265513578138	0.877674636701498	0.714031147774904	8.58133100709771	12.2350141799305	69.0389396169606	78.138524729616	32.5970360333436	31.2810235918158	4.9556712105939	5.24821514457564	16.6596813840428	19.9417222779711	74.5084869039812	63.539080850934	11.4195238716835	8.14135663299183	5.86240838591982	5.13651211874806	31.229872274007	27.6503768841292	0.632982448169151	0.543774574212837	7.90293779094866	10.0790944290783	5.06589502639081
ANB1	7.0265049251459	12.1816312770403	15.4230600353557	10.7801390904453	12.4218255164836	11.9821010943944	58.5493417387994	29.7670794088187	23.3083730964614	18.260360712758	0	0	31.5932441917169	18.8657604372214	85.6023452607802	76.342389687376	9.42280787429688	24.9102697001562	3.77615044621279	10.6325304121583	8.27111257497564	7.44978532001736	28.3500235520455	34.9488689906642	102.42353548918	67.19891498663	8.55114909825122	6.90879979231504	12.3760128850091	0	14.3428419799022	19.7357986596489	17.9093204300458	30.8206451036151	12.337410942647	11.2605309825335	5.41129245359929	5.29576644062279	23.6875884645937	17.9403252576618	25.628487201027	28.004336079746	12.5961884356102	18.3687220259342	21.4456498038106	14.7385931341115	15.3002898402477	23.963780588513	30.1113599914338
ANP1	39.419007861667	46.6845884311659	34.6095701630819	44.7978280717974	40.1489367843673	40.7392885109971	25.6823762148176	21.3038281818708	44.7975890500562	41.2294307375299	42.5874480107803	41.2646452574172	43.678728406796	47.038950081715	39.525328564473	39.6558734801811	46.9886104383999	44.7710387127856	75.32183775731	69.5904757080709	24.4896107635239	24.2505684769871	47.6151429908665	43.5697962461548	54.2335877320055	55.2915676903346	97.1291220195675	89.0008425613224	55.0295071168203	68.121480174179	11.4238904049602	14.3524009718534	97.2160564180845	104.432492293599	82.671491608378	80.4860258742775	61.839459158299	51.7164192908454	95.1544366062435	89.9288672988158	86.9759974881157	80.2149937460682	76.771686609925	91.5991890062936	53.4714633905321	47.4667675426684	86.8948155130139	94.6043911259253	73.2013463291389
ANR2	11.2634447140822	11.66201374797	10.1982523215415	8.91027566206387	13.8278642631578	11.349716045275	18.2494405377447	17.2309578072745	11.6759888592127	10.2449256269944	14.6025603852697	17.0546191957439	14.6088033504838	11.3406275591546	23.5053056566461	12.7475370530475	11.9578643320156	11.4801568537244	23.83429285525	23.9679164725838	14.9159237762414	18.4105382493574	12.5446405082918	8.06388834980294	23.8332460663869	25.8526584935317	21.1323041881637	19.3808026627756	22.3184947631531	22.1026317179175	6.7058469876971	5.93182081854044	19.7371237704849	27.0779214039014	17.3046699300938	23.014514139636	21.1435386747866	24.4060710870408	26.3687678314507	19.3219397547172	15.8338189773984	24.0486525131093	24.3981849791959	23.0038838683126	14.6103214067756	15.7505874348052	21.4604557631405	28.2101478826234	13.2737938759596
ANS1	0	0	0	1.31821220038245	0	0	0	0	0	0	0	0	0	0	0	0	0	0	0	0	0	0	1.15555596962905	0	0	0	0	0	0	2.99743808095066	0	0	0	0	3.01726997335245	0	0	0	0	0	2.08925887241442	0	0	0	1.39861568588275	1.20150462361288	0	0	0
ANT1	17.4004386430936	20.5135261590499	16.9576921011734	22.1939809009062	13.7980147242085	16.4791354474945	33.4989603903255	37.463649982537	24.0787214178266	23.0140877153388	33.6847725076076	30.4708501800688	23.8373562591169	24.6675244336105	29.45341464809	39.4142991601396	24.1719768645146	25.7448164808772	39.6140753691632	26.4932972737885	18.4408132956281	22.107608287167	20.6132658695743	22.2512392718689	35.1469498944737	43.4461128480368	42.1857614781727	43.978490349696	24.550442782939	35.7985017835795	11.45516720954	25.8232355393969	36.9245660674505	46.4394382959715	32.6329187410537	29.3546935589899	31.5853598705205	31.9478543749627	35.2871759271691	42.4503020207525	31.2179997452345	37.7079362284877	31.8018294065965	34.7271396376047	13.2914086019608	13.0877170122532	38.4722584247458	45.4160901413353	45.4927897476947
AOS1	16.70801528067	13.0478118738119	11.3986072161471	8.66001495189326	18.6271316844412	17.151019223924	42.8536019246901	34.0092558618042	15.4475533325734	13.2999756974305	49.7622312149292	63.816288738499	14.446979029588	11.7201744147888	38.7132419219716	49.0624582061077	19.1763216439473	19.2107154591917	38.2220427407432	40.1446871591226	71.0956589356265	78.9970803500065	11.766726614452	13.6123130816764	33.9736805327471	31.9578198974847	23.8139000150404	25.5301506733622	34.2004969120298	39.3834444741494	69.1322471278342	55.1731032270447	33.8096600531973	25.1400416902563	34.6884667387356	31.8416827462779	37.3846246430839	39.1390554431	33.8292061543583	31.7064121249463	22.6469325297989	37.2802621460156	36.4279515411957	32.4635152726562	13.322928228074	12.2346150912155	40.9705283787885	26.951114082918	17.4163417449464
APA1	129.92552979477	118.425111406852	136.582320491099	144.631055259524	84.5810994423149	93.3768446738939	445.907796886083	392.484661217151	129.523999646295	157.827789489046	107.293614359886	86.6807067137027	123.534201224832	151.476629289273	396.443326279049	375.217417773572	127.949950979269	154.419076942428	155.832813919143	126.172907851409	111.335241739205	119.631710931471	126.366646060526	152.310079014202	382.710807725492	411.329250559147	159.530886301047	184.770763289281	113.982152978206	106.367773974894	206.613570196823	194.349941604439	187.148148223422	185.59868631894	150.774262073685	170.721381629073	100.634026135112	103.175561344332	158.493415855748	190.649784402108	167.193123047068	218.947513034954	135.34532604025	143.148315832771	88.1212795219371	82.2282786064496	175.240562886428	200.54463580349	187.72715198246
APA2	8.82144895195188	7.08029659288174	6.99214555523249	6.10907694458236	18.2904487499346	20.5130732850932	48.7771107278642	61.1316462381709	10.1605967399586	10.1888722517806	207.288583881064	209.012308765643	10.5939715628821	12.2811360930121	32.0639923104377	52.1374135348817	11.5012556280334	12.5963262596742	74.4039943081195	73.231791233392	199.747449060958	204.376945027801	7.00304704247686	12.5572661514561	29.9577454382883	26.2468388033894	22.8627158222603	37.3448173979589	194.218094443923	157.0777756297	180.901034258937	166.559078426106	35.9124086140369	42.1663440187086	40.8737487545658	49.4797120340004	225.510159578918	208.691472283854	38.5500229354512	35.9745840308839	36.495095541603	36.9717974262446	74.6765322006247	77.6707445047051	12.4647842547939	12.8497219408104	41.7968127360529	37.6066685674441	37.8033564585319
APC1	2.03060741768118	2.24551977202147	1.07301639292616	2.3798036967497	2.5113917436414	2.27351083603785	1.7407704279984	0.708018806621707	2.80664263887577	2.28022646634863	6.45957385918808	5.31420433022626	2.66622935660835	2.55775334096656	2.03608486324521	3.06421535589627	2.85758799993607	3.06618387511583	5.55743730819876	7.25502385221033	5.09043335204026	6.64484594577421	1.83328902430259	2.77719906416382	4.06685545492748	3.16472846298698	5.33904612667618	7.39478034308005	8.21285919982378	9.67484366964977	3.71000952066465	4.96415235252106	4.55266221273951	4.18701429066856	4.45676354338457	6.86997322579168	7.67430219828105	9.63607373939287	6.76100501695905	3.60043043348834	4.34327257329981	4.38908200715048	5.16818298012845	4.79232106517918	1.98935930336331	2.23483996689836	5.86827257215353	4.80926458708175	3.22294496170399
APC11	23.2296559417058	23.6165977735364	25.4943536651598	24.7494365228924	26.6173200469992	34.0108946029975	50.7807828928981	45.5603313806931	16.0536437351368	26.8305718021478	64.8335632145424	55.365290092644	30.1291589214266	19.6350686230368	75.7000599367261	55.502037843229	27.4020310421298	24.0197609484336	55.4843250358309	63.4675934844136	43.6750702629599	84.3773572028093	26.0347130958451	26.2592926732872	75.8540485657922	74.0529311885977	52.3520967638269	47.5842898322063	47.7342723974399	45.0215924794427	76.8338474875795	61.6217649490956	43.1727576443087	32.6580557040946	42.4869543448334	51.7047360799681	69.5710571278321	55.9277050779197	29.0041739208433	61.7818954508564	49.0321771053182	38.5760343384744	42.4141574698254	59.040159653871	13.1295065867045	11.2791262183088	49.1776817726732	46.7643481520496	58.0700525843302
APC2	2.09103956147973	3.56319615333845	2.64796384036959	4.62707218843788	3.15952926327279	5.23647716971625	5.21227214297934	5.67852751132766	4.1685188033421	4.87681298914027	12.7727248831267	11.3656879274555	5.56327493887204	4.46266076985468	6.16909052315725	6.91762353706684	3.23556298081564	4.70448958103812	11.237565079286	10.3443802785248	13.2538244822389	13.0746539359744	4.05613704701117	4.84871614533791	11.34514642828	7.38383316633101	7.83004186370454	8.69845465665435	12.7488767419528	16.4834063460059	7.66111566389709	8.35806430698619	6.6621054172084	7.59810130029785	9.88487305965918	12.8886971686315	12.3874123676794	13.6383133743365	7.23002963502108	7.95701482041121	6.84461776226656	9.38705521688622	7.68929912215933	10.249491316151	2.12735703671105	2.67101623324469	7.29690702381625	7.5428862794368	3.44650936189342
APC5	5.52361297680102	5.71412762157335	2.24523203515912	6.0811384001936	5.42495766941761	6.18435975112599	9.94392156427919	14.9260304394076	5.93798051990684	7.26593993027475	24.8649499608161	22.7158751927827	7.60640731738571	6.22516115965628	7.84621014548648	7.87210984985578	6.63002235501937	6.70871172744401	10.7194894520294	9.67398136838829	24.9845989325446	26.7512039321883	4.64295240555844	7.40029012601303	13.4674729653087	12.1303357121169	8.71386430948384	9.05174992260167	24.1420416869044	15.6119692823742	21.2277424184581	19.8241091528638	8.47329236364357	11.3893979946347	8.98013825062313	10.4913099543714	18.5121970685421	24.2844857607694	9.57873306592714	9.46732691124528	11.1926675364374	7.86230870276037	12.2246783409425	13.3701914018357	3.95448520422414	5.18515200393216	7.79571819391176	9.15745211689106	11.83539872873
APC9	2.55448678753368	7.99610514205349	6.30791017075678	7.96066800969603	8.15378579187844	10.3951731212836	44.34483458718	30.060491276483	5.29606511364723	4.97890012818766	82.7938216102431	93.4733855346833	4.96975303676663	6.28705224346108	27.3746221674364	28.9105456299307	10.7051150966885	9.62209661590644	32.6043379037803	39.862329607303	86.4498135564868	67.7091333836057	6.441607625952	9.14416191194134	13.5130696331901	24.4300099587335	12.953167148686	20.4073397526687	59.6153507012796	44.5576227879639	77.1286000939401	57.3993259430054	17.2946207097373	16.160739318225	15.4179937146092	23.5390552060055	71.3132483118329	83.0273277742584	14.3526490521654	15.2863780382936	14.5580860028794	18.1802148455622	17.1724343536642	20.8685212676219	2.59883747773044	3.90702032798702	17.3824837460876	17.6962489172963	9.57859594427161
APD1	36.0536575230143	26.8995107935687	30.651550767069	53.5607386383907	51.8676253067386	54.3174103940268	128.114031674123	107.561498166944	45.7964809614616	42.2288516923732	225.480239206922	237.071645003973	46.9813615883413	52.7181979298749	89.3586670946624	117.239866089851	45.3981656434435	50.8566837724944	135.766588740005	134.469856951583	308.584873909276	274.577130518961	42.6836019584996	45.5392734292369	91.9284657144097	108.782450273029	88.5772250510086	114.836039306153	185.140393110105	172.720485891919	285.048289650018	293.814000219484	97.8801778890479	119.935419231962	120.367175083934	110.674622458319	209.220838565985	254.506972797734	84.6425566167005	109.394039394523	84.8893123971323	109.142677697651	130.477831282725	124.451286404708	26.8640887269078	27.5161559506835	113.337515237968	117.980679474838	83.7802350272648
APE1	4.80838037420346	3.81390940346572	4.34589197015748	5.42431760731439	26.6682890495834	34.2014383168544	37.3168817376561	21.9679152633509	7.91655062357926	9.5557174853305	254.854793951877	301.932188875335	11.2502083463198	11.6445297568051	22.9723823335649	33.2919140621571	14.8561760115245	12.534282736965	79.4230951786763	93.6259928428865	265.942069755481	248.404698956563	9.74776808053822	12.5762775262349	25.93490472603	20.0172584473891	38.4378628504377	41.7160998115075	165.397824668857	202.280958994403	203.038506326126	201.392828170665	41.9038208031678	41.9915477005439	60.2166276732665	60.2867971762071	209.114241782261	197.188559979595	42.9085643304028	46.9412677384233	36.9675649270654	35.831752957596	71.8317623998014	71.1686680187434	5.46742725765876	3.46086544354216	45.6792823535336	45.8204708707709	29.6966780082126
APE2	7.60930075985032	3.6400980338243	4.02489704136299	0.886136428083045	16.9814863497209	11.9085477458843	40.4229199299703	21.3550223331199	11.9272068526743	5.51208457489605	90.991700630312	124.142732048	6.35343816130662	10.3916309408142	34.3908996134723	18.5129907131729	5.7979857512073	9.58350215314668	55.7544093019299	27.4101274038567	111.496610602701	102.348298021422	10.9313273659995	9.51091832982759	26.6957470842878	25.4347746906536	37.7785617548917	18.1265009930617	62.1772345786221	92.6100235783139	84.0660455641902	88.2481270474082	33.8845673985143	31.2465588192952	33.3162564309549	42.7407519180553	90.9590355522975	81.673767374055	40.0122891169771	47.05071221556	22.2286578863086	33.0309625610359	57.7090202006527	34.2673075678721	2.83231056368717	6.43060229480908	16.7154818349685	17.7848475920904	20.9908190217202
APE3	177.273464002621	183.695077863704	152.633399597287	182.3655044532	215.851112149308	258.970336059756	567.848726577681	400.128477593311	216.950297692652	208.792331091996	1146.95745047915	1107.88943002209	215.852942075329	227.270620013483	546.203156785457	596.719098850482	236.888015128401	233.648538489216	507.067493103513	498.644545731246	1112.24571139337	1070.96073929566	226.341256187072	225.024931509729	657.747851393718	628.757100044737	393.939082002178	431.129612948112	752.872115507138	855.741237205578	884.97343237065	966.371249734866	541.229612929396	567.279407214808	438.672976080109	418.598185458794	950.376949895643	988.885030445317	472.070110855064	458.030017888964	495.080219418376	547.166777285272	440.439968104834	463.69238101853	233.171814028417	199.8400450871	451.521460063104	491.972859593124	476.677718717865
APE4	14.3470120694171	11.5152492339325	16.7298061359484	19.7757951460658	20.5490551511182	26.1799533756384	71.9502558271341	54.1668605449781	18.5906021692177	17.8655880243821	127.39236605179	128.229384346801	16.5406209661032	22.470491664627	53.2723010197013	53.4481306349206	22.3796610877627	17.2191534661002	75.4966650809653	73.4967710397701	154.809621070783	168.485762391028	18.3406271327372	19.371690952923	48.4884565549585	45.1647136372543	51.5314693590483	55.8386863386909	128.454493431566	114.048371271726	148.971169999447	148.59662432032	57.1374209382941	55.4679229020111	70.8499020660011	65.6238253992345	152.499357486269	140.232216171735	61.5774516763252	54.3745977861725	50.4212689778375	60.4137519371916	66.0845147790114	64.9519472617732	13.0757586620151	12.8003318295924	60.2035370207999	56.0658441991419	49.9545789156054
API2	0	0	0	0	0	0	0	0	0	0	0	0	0	0	0	0	0	0	0	0	0	0	0	0	0	0	0	0	0	0	0	0	0	0	0	0	0	0	0	4.74850733738296	0	0	0	0	0	0	0	0	0
APJ1	7.13065231074537	12.1508503406253	8.42780492504216	11.3080942937591	5.11781061845988	6.16487100957194	285.659278320883	205.261450967771	9.66624491152029	12.1164196872527	65.7784340126843	67.8263790624149	10.4342229772467	9.32722514667612	113.848282948501	116.086795376414	7.96872076716139	11.6674569510267	30.9517407162685	34.2378559124797	175.138388242157	165.258338215938	8.29906848930486	9.5074310362291	69.6385027861663	69.7687443019483	14.4631707192416	18.2021268750946	42.0257723239865	49.034319474849	369.484152151561	402.877958269266	21.4077926583011	17.1192944127991	35.5141876269376	25.0524551294453	57.5551345514333	59.4268770286388	21.0595083028819	20.569541713118	14.5879962497464	16.3957996976301	30.3183800002139	34.0556341289861	1.95313578445343	1.19848184084981	22.8924508290387	18.1222959465372	9.99001113208509
APL1	11.584329251984	12.5040237405731	11.6176753716066	9.95889226622673	11.7697620767557	9.2888902184762	31.8986548157865	27.7344211757425	19.2552196643728	13.4954004557286	55.3486673243242	46.3712662265566	12.4344568270467	15.9091160399502	27.4868884338569	32.5506757662931	14.0618421306916	16.1088024677938	26.8344374994434	27.9564171674711	70.8267108298008	67.0580840241479	16.9564632358876	15.5034948988054	39.4449378464289	32.0903351043498	25.5221426364445	30.4394470827024	45.7326697402192	43.984034613281	56.0585428134518	59.1849940515717	22.5902815074856	20.5542414521703	31.1239731206644	25.2865685327282	55.3741643564257	52.6865492809067	23.5663526238004	17.8485068732255	14.8734093891287	21.8908161352724	28.0471572467931	27.4120662888362	7.92474287998927	8.37894772039653	20.2959762590035	23.8411186234739	25.6776652640298
APL2	15.9234909711804	16.9997056553541	14.1070296917353	17.6602390983307	15.6391196493519	18.7370494986869	37.7449998441791	32.5099692510444	13.3246865370427	17.9486802381934	62.4919548352017	53.2563214631366	16.2569094707204	15.1097111206807	41.118407826781	46.8995497819197	16.722979100368	17.3435913702711	36.8592278294273	43.9088793667503	71.4196332056326	64.4118435127717	14.513560113868	16.7713229852045	41.948101858695	37.0624110147845	32.6868470228337	31.5963634297359	42.9145112496056	51.8695275122737	63.9633172957479	51.9999126233895	33.3124505271486	32.6896807667284	27.3695411067639	36.5869836927582	52.0811898381999	53.8610904023735	31.2599537427452	30.308635856738	25.6575067038649	30.3117613189653	34.9653476845852	28.5247163298418	16.004881314262	13.5815935888585	30.2871357241826	33.9417087515716	31.6527848399849
APL3	3.69512159350543	4.06737275364974	2.46219013538501	5.94750281524469	3.75874176801331	4.80772485552713	7.02555158304357	4.65895514062065	4.37768256139831	4.57278128833339	14.9705457811447	7.99281915516785	4.2220731959936	4.72438150360107	5.65688137332077	9.26014874903789	5.60420027088329	3.9767500521818	13.652517168203	15.7260585228529	13.5926990955792	12.1262734872829	2.99507411435109	4.5748792278501	6.51567078583153	7.32018489803551	10.1715703778081	14.2733652599308	14.4113050912467	17.2644795358392	8.30591826711552	5.37471631727607	7.98869206262681	9.35082762622926	8.39970503803411	11.6320096464435	14.990838941186	15.9140413762267	8.65065370130856	6.73897046361567	7.82181084329235	6.57456425347645	11.0402506908957	9.7029253429287	1.47687296803422	2.88349430733689	7.90251104628383	8.15767464477626	7.63480241826695
APL4	13.8822614582104	13.8481919114276	17.7749053875791	13.6283815719202	13.6343127430879	15.1158501950701	37.4875101923646	30.3388774349595	16.4465283004016	21.1880347095086	44.9942974690403	45.4596139239662	17.5766896257122	18.9323127741997	27.9636786237278	44.8896834689162	16.4372617644845	18.1627296041175	32.4177755953864	38.1370645749386	51.795881034427	54.9023803853834	16.8088021871995	21.6709986144171	42.3522029399943	41.0937606425497	27.487065031313	38.5927922737888	32.0194219589494	42.5199539511749	46.1040617090973	39.6882823317454	33.9617721873753	37.0817982657073	30.8314126418076	37.0790310647507	42.9552393145577	49.5115600841023	40.5471369198406	36.3940850371537	30.1393087261728	31.5219567198019	39.0082066257015	34.8329170315324	8.07049266917306	11.4107105036848	32.3878930229423	32.4088606905481	25.4961319561404
APL5	14.0311880231124	13.091788244444	13.7950302615681	14.4352931719177	13.2064083629306	13.8214270933374	31.8002952464958	21.6714654107688	13.7875322957699	15.6997714078655	34.5814998888917	29.1386090613456	14.5335787046492	15.6970290205522	23.411750434629	38.0457283385411	17.4769447082861	16.8401382988618	28.080800648941	26.8164493911482	33.979398307219	35.8997149075809	14.8654961755481	12.7770500181673	25.428688658122	32.4289634007296	26.9772845779995	26.9455195069991	25.4858666777625	26.4503889169874	29.8345185241882	28.1209049368737	30.0353877418274	26.1371450222964	24.0590329082717	26.9364786195747	28.9842651016579	35.2502730546052	25.183730176373	27.2885540163837	24.6557478401459	27.2535059828038	27.9480525567748	23.4028479592624	11.449649758198	12.3908330932646	21.2173713334404	27.1043135886274	25.3670181499478
APL6	14.9295857361978	14.1181306316763	11.9749410393107	14.0008954971036	15.3084223054053	14.9370055177479	27.6183049581851	38.6099966427847	16.1557477642184	16.9800801724405	39.5016413932841	31.464022159197	18.2991838786598	17.7657334614234	32.6976183834467	40.4750341328515	17.0514044696654	15.248935380444	25.6647109849728	34.4765226078523	36.9504402100571	34.3362690241424	16.3212989180864	17.0860793558036	40.476323699184	39.1292483064004	31.8137618579007	37.694860573592	28.8195922887058	24.3231529488582	28.6872853321989	26.0767415371511	29.8865347717467	27.8912559831943	29.5253955543396	31.4018573831053	29.8744814917389	27.6017499415754	31.0318034235422	26.7022830561023	24.5940520958248	25.2360764071624	21.8903593472881	32.8391644360605	14.6878419651359	11.9178853616017	29.1734921782427	27.298627883731	25.5476468068011
APM1	17.6035988667209	16.3623384293588	13.8834971036238	13.0020231305109	15.452259444493	21.8232205869208	51.9490913919845	55.9091859491579	14.6978030040598	20.0553105869239	56.9042331873059	49.1876800551485	17.3218170122131	15.9203951217036	44.574169283166	46.7762352750661	14.1677533148026	17.8152624863623	24.4103249377459	32.6827325650943	85.2775707779916	102.117679397416	12.6992198679164	15.3552567975341	41.3942811063822	36.6571593203267	28.124784726551	33.3244059648506	40.1614530392678	38.3414381292628	107.390034489922	116.479045903795	30.0853437816787	38.0545320223379	25.7575215724917	36.0800942761537	44.4795066988313	48.9919675433791	38.805549089672	23.2395422353764	27.2907562028467	24.1486057859727	40.5534271668608	34.3282941976857	13.4078666582827	16.1888909354499	23.5495309267006	28.2862358331205	25.2186553800448
APM2	5.40502467615635	6.79022411258454	6.18985813321577	6.3094672268287	8.0781425644534	8.9255540516431	25.0211505468959	25.9950927026303	6.8210364069963	6.92143464434375	51.7935748770841	51.001885081347	8.12794272066267	8.41284264912481	19.6165952166201	20.745263547466	7.35336375589867	9.7891638584892	17.9967366715534	19.1136712893697	48.755469068431	50.661965450051	6.32106529990384	7.43820038222887	20.4427836309116	19.3281501081192	16.6829032118054	15.5967886310493	26.4904557710247	36.8919644122234	57.5633324353982	59.7358120431496	22.4615712401042	21.8052314516588	22.6942778096046	21.466604935514	35.2911304337203	38.965544449863	20.6859410733227	15.0002929952331	13.2142345507779	19.7355507340079	19.6596499787352	22.2697899409651	5.49889624983445	6.36703062160204	16.6307730190011	16.5302494128175	12.0848311227098
APM3	14.8923355809786	16.6696936485447	15.2448381069965	13.6860253256545	11.9351891625792	12.2367578451022	25.9944946790597	23.3516352856855	13.5384737693008	20.7733074711446	23.1045335377203	16.8659755100836	13.657535395377	15.7634087185241	32.9062169368687	37.7013585651403	16.7905063654052	17.4928232929421	28.5667846852801	28.7067413819965	20.0860956046227	24.7045718432263	15.0127347319653	17.3925112191031	34.298636377423	42.9607277399319	29.5733560932598	24.6568757306382	18.4743755640875	15.4524216051241	12.0561322434593	11.9436699032485	23.7182728586505	23.4341714115895	28.6579367908722	24.8402688620294	26.7439338227136	27.4612214871225	26.54640780717	24.8851142498869	22.4040406974829	25.0596234640445	17.7869069860714	30.2747003826055	13.9141807166268	16.6016529031696	31.9876065273379	25.9940436741988	24.7198911088671
APM4	17.5932557156031	18.6681333301469	17.3448539198709	22.5884519476959	26.9435216635384	24.269101088971	51.0749380367392	36.4940401475719	20.4014259843312	25.3144775911802	73.9358185699757	87.2913198412724	20.8848304248149	26.9543582591047	41.0370990060888	30.3732538652434	28.9916169376624	22.7285422632848	50.07886775447	46.2503148837599	97.8439391708798	92.2115893335682	23.5609944438149	23.8204088978471	45.5697800504197	42.2063616359268	58.667754673745	54.9739850886133	49.895145939044	57.2146734785722	102.968745394512	83.7547694095908	42.2770218067623	54.8339816289715	54.9752767931763	53.9998780980123	74.0601141824391	71.3551364522073	51.3795950981235	53.7704837966651	45.317540098262	55.177879444259	40.9826452806717	52.1311694578982	19.1123113775254	19.0249089063701	44.9108218983528	54.6623684007349	45.3642287838018
APN1	26.7700005483166	31.5461706784373	27.3776334888855	30.1448565391272	24.1836155184762	25.4298540108916	32.0074968368278	29.7587044233697	22.2052453744562	24.2076915611542	44.7549302001777	34.9816056151616	24.2347626938258	26.2621621628276	37.1835343720955	39.7487597320968	30.8851347603057	31.467644352415	57.3509060777071	46.1418580327773	44.2356570389417	26.3975474900137	25.3726148957724	24.8888706590874	31.1740157392199	32.9653158960903	43.8805958533458	41.408156423214	41.6588210752798	57.5838972127327	21.5017272265777	26.7390203433291	45.350894410742	52.7602969178169	43.3424960694902	54.6558598228386	33.12281860678	38.3314870494899	55.3404983582789	48.8197753472362	42.4778012526961	44.9007941131568	54.8322165606314	52.1540097813206	36.8736586677788	29.3175578213358	35.1692013759292	57.9923251400914	51.3831736766118
APN2	3.34920613619199	3.49459503357433	2.45046267050793	4.81721581393459	4.65995214755303	7.35545068305374	7.10613254473945	6.56878025377909	4.91846293017554	6.28610661007316	22.6150647535128	26.0603156252154	3.61994391167533	4.99577002170749	11.3340216633314	10.1079860301284	4.6785436298858	4.94731307590159	14.2492650911046	17.9491774751542	20.5336005218563	35.0163157387365	4.69204072628649	3.5756571185411	5.24949392789543	6.40608846554936	11.3220085882828	11.6630010581273	23.1045637103241	16.4306221581516	22.7884799884369	20.3820618340065	7.11374007481531	9.88795522241464	7.35077970727579	13.4183688183236	21.4941754702511	18.9317757394393	12.0225083101949	9.79837204922471	8.48321172542206	12.3153975327802	18.3454970570838	13.6804638472881	5.96288033640233	3.90287381591755	6.07743080100013	12.493209282967	8.97041915612955
APP1	15.8038412015666	16.3923119969497	14.4093228678281	17.9516883400663	13.3724627595551	16.9614021664264	32.0777800595792	24.6060356797645	14.1143039484949	16.0070488982744	44.9181935897886	44.7909517580613	16.6084006414707	17.4081405327734	27.4266124659977	24.7654465917206	16.8461275073964	20.0406133614439	38.8728554147615	43.2298532071037	44.7192690122218	46.8304812329953	14.3060107857763	16.673988121137	33.7264496203245	32.5536262158739	35.5071193724812	31.0780984914885	50.532599014592	51.4222894124167	33.5003601924974	34.1456263985589	33.3094585076495	36.9165282361118	45.3588477404682	45.9780889162828	45.4069653402261	44.895684009662	36.8843934080786	33.3671154621134	28.4519582477483	37.3767000019331	29.7838741943337	44.4924754227162	14.8415412825121	14.6623611045267	39.2661101874836	25.3945525126588	29.695119998095
APQ12	49.8799079791091	51.4732947685068	44.9670539158805	44.4124427305	36.7418549962353	66.2793856706202	37.1098648601303	29.3486996210242	60.9401585285254	63.2700355905841	54.8514210321864	26.9734113092995	56.9927711312926	76.5279942332106	52.2470632582297	48.3874313926168	65.6960322314393	39.4716096406599	98.1296188097961	87.6084863096726	36.6969488919226	78.6972143107501	38.9323987080282	71.1526012100749	50.2591842963688	51.1102910305844	75.8783872262486	100.715463162073	50.2027247467046	34.9574073285635	57.5753427283568	30.0215762583556	85.1347091120306	75.1336164035109	78.1972365630047	79.9363205182779	30.8681633850227	50.3485507831858	70.0639605318528	65.383041774879	89.3411572913085	73.5346521707584	42.5799208105275	52.3911931918213	56.1831639150198	77.8469610902089	87.278885711355	75.943508498403	95.4261093639542
APQ13	0	0	1.95509277721166	0	1.74960641722215	0	0	0	1.84666819864169	0	0	8.99113710309984	0	0	0	0	0	0	0	0	0	3.14788857243	0	0	4.18828168336832	0	0	0	3.13766721718558	0	0	2.50179635843183	0	0	0	0	0	3.35656781307194	0	0	0	0	0	0	0	0	0	0	3.81704940039726
APS1	34.1064790977745	30.11208180481	40.550597256491	23.1653185322431	44.6629607568291	38.5535378237761	23.0251439633184	36.7909415925066	30.9360257961073	29.5448704128883	122.058666811666	132.691943391147	33.177168577704	29.2525287126878	51.2973980848594	35.3835563103063	33.3504722785955	34.0069845726308	80.1906589763685	83.3281380885048	102.460572518466	102.958540868321	27.474144262885	37.4836252167272	33.411288978201	54.3634247434659	63.4135259691836	69.8643605745124	135.16345609045	114.645264163311	45.9296122038726	55.881582890125	54.3318683686811	74.3216664591845	106.046960911321	86.5419465462067	106.706711657929	107.105924570927	82.5075719782878	61.2292496520342	51.833332670051	56.6380891995282	118.886174580343	71.9790545588733	27.4699237894696	17.3883370243726	46.4168038205147	69.6705176020386	48.7197805098652
APS2	23.7157840442444	28.9330710190148	27.7629962078576	33.3528677200255	52.7957839127729	47.794907945833	87.829092210369	96.7483245522667	44.2519083523344	32.8705346633594	161.419284631405	119.697744604448	28.7090792386554	42.4502052908316	46.3706116485156	78.7326091871034	44.1717165008152	25.2230602778864	97.713505830548	104.669488447774	207.047999023232	187.186274191749	34.5535303775646	39.3195165563189	115.233211627082	66.5307301010756	92.9987411487513	97.1600415149743	133.66805892385	96.5240209041111	123.714024336243	115.460731120453	75.5591781364823	90.6886056166132	111.042515806086	83.6144601336442	167.420908518034	142.993748085003	68.1057896367142	52.9830042089421	79.2926270194285	96.7705088046411	85.0292330634432	92.9968981487138	28.9532449894484	24.8726931674625	91.8066466051318	87.6222696296365	105.019431016756
APS3	31.8640641871663	18.2221125154392	24.0421914423129	21.9606549362504	26.4053412721488	31.6450250859604	57.6197745417002	42.1840627369668	20.6445044483594	35.3658412608655	41.9559272222263	45.2317479151065	24.9690471230521	21.3883328259944	60.6551965693398	69.871380865878	27.819604248165	30.006025266536	58.8646592366035	50.8536919758659	43.9550236016216	33.4317246624266	25.9468875150266	38.2710786099344	63.2099113510256	66.6609529948296	38.3741870356677	56.2965806549246	52.6155616247402	67.304819154547	42.3454905705697	36.3589268446084	46.0012846493613	47.0369359766941	61.1931471094506	52.6606126156786	32.5913670169225	65.6672942801767	46.6230850753977	27.012990394812	34.8058229313266	34.0166434975248	56.5267124370233	48.8082286902733	29.3783168950235	26.1083046930148	46.9790399164196	55.1850323417057	40.5384180906855
APT1	155.971262911589	171.53887870462	128.382645853467	148.547499088111	136.625155911845	108.643797771533	143.918059370855	133.936954792047	157.314125001909	133.285668701856	34.1570793528284	29.2545816265819	164.935156139286	164.113804559877	199.716953293855	169.365768936187	183.723917833459	148.510907934955	247.782406582465	175.417248054398	35.6653010542658	14.8979012827028	174.509904390048	168.371034668727	240.338518146601	264.062277235348	258.643467215253	272.003060008848	107.6593575448	101.103298182486	12.548604297652	16.280263942376	198.100008168561	204.460183831926	233.613495887122	211.111898836738	56.8122882148518	59.5706970195488	244.74437163245	245.530928975425	217.817856713624	217.50986491083	261.341952979306	239.341079495159	238.020266716725	262.501203129055	242.865189628507	213.403385703643	239.358602110061
APT2	61.0139769055813	65.1763621338206	49.9172434938231	41.4855836584461	32.6860292880309	48.1531185446794	23.1094191811379	31.3308616183053	44.8490840321852	49.0100117773955	57.5286835141051	53.1910555173327	51.797897686425	44.6778239371207	27.5303654348429	35.1543935153052	49.5890024867642	49.1602817048269	107.312244367679	81.8350076911697	31.0138590207989	17.6425720486143	46.6238705002097	62.7012576674786	36.5143601707889	33.949937536205	123.754907552948	128.164287991874	68.3873209175115	91.9135378794571	20.7574393633516	20.2532881713016	58.3176657728542	99.1908181646045	97.3915760880001	112.002466284922	59.803460589157	54.3461553974042	83.1063150902472	93.8239626149499	77.552394474443	91.5844817758662	96.1197721710208	97.8770150441081	66.58818490801	49.4472791062622	104.676198834545	101.678637046583	61.8017381078033
AQR1	34.348148428189	44.5791219198324	12.2982681344159	18.920628354676	9.33090837207425	16.0499777211482	3.38311663722397	1.1466709856646	22.7274211045287	20.6804496642699	5.92167241196018	4.30330386101187	25.6978516111911	30.3050511885501	6.04548836852157	7.71966829633464	16.6063464820712	22.2383048715478	36.3294172174321	36.4015084663729	2.86754943517341	1.72186171143501	25.3909140922569	26.6196650940213	9.73652928911198	13.0465293672366	10.3762197455797	21.5570423720962	20.1661821855588	28.6819981471378	0.414381629804298	1.71056926427985	8.14940625286478	11.0962984649365	31.0103941393939	37.4779949964607	9.84934294719398	18.819057409338	15.9684292220105	19.4368618791238	7.77455452849317	13.5231268948637	41.4866482764334	36.2198289301529	63.1979896206032	72.8142240742976	19.4498482748248	18.1739311177266	6.26365299804617
AQY1	0.531270156116653	0.511692699457199	0.583063788803218	1.01885082344732	1.56534432459756	1.23539798745387	1.22968856457989	0	0.55072775967989	0.920435370484917	18.0801348609071	16.088494930694	0.45937405134743	0.475476596873258	0	0	0	0	7.85160287562865	18.0881378154758	5.47203052655887	3.75515749015631	0.446566408637173	0.400372240775563	0	0	1.07757961671227	2.61184242467362	29.00799508659	32.4342567539249	0.903714493674904	2.23832175246041	0.846319429783407	2.68884479550924	5.83014296350361	9.36545230691128	18.4115297309121	26.0265818113338	1.99000287714426	5.08671680411846	1.6147923450766	2.26863497432276	0	16.4925526019512	1.08099405914279	0.92864695453991	4.82018767534712	5.66214340917852	3.41505263503629
AQY2	1.54247239823116	4.4568777506775	5.07854756946657	4.43715570557847	9.08955054137528	11.9560388842924	7.14048912668886	0	6.39587057874094	8.01710031695079	2.49968462110057	3.8925614168951	10.669860444	11.0438323339353	17.3996323715763	10.4742761582378	15.5137967978785	15.0379523173573	29.0131930843123	11.6703269049986	4.53923193754443	16.3538900164037	10.3723700915663	8.13700902202932	7.25295568195074	11.8012668491362	12.514434374604	11.3746884695483	8.15040727532081	10.0894817239263	5.24759725096561	4.33244294701698	17.2002652376761	18.2156483792345	6.77079832554215	12.3596973810412	11.8789457093125	2.90633936511548	17.3331448928391	9.84571844592459	7.03251787111089	8.78224609547092	13.825663672029	20.1616577518351	10.9848302116609	12.1329151354289	11.1958063108926	9.86356876959849	9.91512612966118
ARA1	10.6886222393087	2.7491160759905	2.29627316070366	23.0709533854775	24.1980698048501	19.2511410719544	132.018398614746	47.2854141677722	20.0233808332713	12.2178858926371	422.316109537386	576.522966916184	17.3089751300692	14.8752098036146	86.8893555412777	95.2559523619354	19.4278310889895	15.0130121077103	194.873790951995	196.480677733025	389.856045317727	373.314052178947	8.65382996804682	11.9808783909639	28.3266972852753	46.5599031873396	96.5906553980229	58.9679658968047	337.960375548197	225.269634721018	265.205283966807	263.331912180126	93.6726504684228	76.7248389069556	89.6703515581719	125.819005016108	406.813966717299	426.733595074324	40.9692866171779	80.8858682315336	81.3788432977651	81.0015027015653	136.713830494217	149.827182354573	29.3914817187816	8.46850256686726	132.060937407097	72.2255487050542	46.4481012417038
ARA2	8.49222077424623	9.99689123930042	10.3557068641809	6.33346863217079	8.34056758288719	20.1132500241173	18.564283515878	14.4349853366886	5.86884989067237	7.35648334804197	57.3427303699538	67.8646600498576	8.56683618410812	8.02262094825975	10.6439437775237	13.8827912224741	7.90859780750103	7.9447871120133	36.7643899935814	37.480469264018	51.3707575457701	46.6863600500042	7.53483278273621	7.46652058104885	9.98297658533038	13.5360601479891	15.3109885516359	19.7151175470711	39.8869478839328	46.2905376345001	30.4963357090981	31.8036021827385	15.0313716743382	15.1227615619752	21.7451506190278	25.7067877382035	39.0588603774601	40.002848653334	19.4393215599956	21.8332512085405	13.6230391788025	20.1464347653953	26.7824683415502	30.8339026906044	6.2397973407609	6.1850993376074	23.1148914855779	17.0959616187556	22.2398908104728
ARB1	148.165763189723	151.622351330366	125.79149802665	116.931010639943	89.7012624762787	109.511090207705	127.821261876328	129.234236247071	151.213077038594	155.028507639248	77.6221002212298	53.1367090663075	142.847672381103	155.415963684306	155.679986745386	158.087796485107	145.535176249387	140.31864844961	195.626985380619	181.360190502562	50.9926226916944	59.4518737393226	153.360469422904	142.382260359342	200.853077137618	210.022702684589	204.198508814633	252.980696827608	104.203561209631	129.668507164296	58.6487626615377	63.6199769565861	203.777365168125	241.531846569678	193.263870924794	227.989074833384	80.239396488981	98.6648129138778	219.749738521703	205.425331156878	187.811972066735	207.065928447074	211.031159718543	222.384067433276	249.331382021837	267.042737945968	204.143445604089	214.347376718779	172.841621769096
ARC1	146.604416392101	154.166320034233	153.309283605259	163.180027783424	136.692069063956	148.196966142777	395.776279506906	375.808587249718	168.112013673925	182.358338330699	159.77893750429	130.570172595347	182.03423291983	174.562780423994	462.05808775668	424.328521150402	183.170964307912	201.198489630189	258.427115442972	243.770329689895	129.242239415132	149.712911772589	176.492185313692	184.321184381494	513.141276112624	537.752269537006	308.752914603516	305.662194760398	167.468469345178	193.412551482838	137.386241583066	163.856378190256	303.838511556346	319.404824790815	240.941627572772	266.01646979398	165.588110067867	194.762227391241	272.727762908323	271.589886765028	266.394816738883	297.749519044429	285.787776517162	235.23812685128	189.272696528174	156.645657110445	283.484347118897	308.385941904909	285.723475456453
ARC15	66.8740261749481	39.2058300933652	95.7307627249789	97.5804769870578	114.225455483818	136.349954170745	467.729767808148	424.271015303868	105.49217742187	117.119943028429	737.417022563438	858.485659047023	98.0497075219335	117.099599402417	314.86408319328	306.032174037954	120.22370640459	126.271141151939	308.60734712174	346.478967570471	1093.09166008652	1140.60385406235	114.867990791975	106.272460080407	270.019940920886	303.094516801795	230.000034430311	285.884755337125	412.254761632454	465.958227863918	1137.55489758015	1178.0420223136	236.221542322415	247.713410913899	312.69406177239	265.597472155963	626.973633983135	583.455737153846	299.502651527674	285.348543556313	251.870063315192	227.624821311146	251.927301856233	277.91037681102	56.2031643203446	40.6588817206866	261.164000856137	244.805872358356	202.475979372607
ARC18	50.1309577329718	41.6993382457329	53.7677611284628	75.3818270430513	66.0205411166338	87.4294483286176	184.59966958588	158.207991053854	66.1397674498407	71.061341848265	343.426468354295	333.525299544646	69.9459126851921	70.3581638751148	174.788925377718	183.103025018267	84.0341272722794	86.8419269438563	200.527538956369	249.986879193946	419.110179973466	467.082471794675	80.4456970760668	85.8622305951856	155.363666724141	163.442900268541	134.033850739219	173.638562499339	260.877209245505	327.911973751885	279.08067533618	296.012282892393	166.978196775039	121.094081771888	167.541140328167	149.722026246158	418.974661050594	358.507433482736	151.502387726044	165.449352912344	152.372548843235	157.308612057678	163.39613420254	195.461555297379	28.9780556188387	20.9111302576387	136.450539715638	162.713342867986	158.681822720163
ARC19	54.7224281575989	59.733182443526	84.0803703916982	80.4577078447369	103.907238324762	93.3166120105471	205.473602030229	191.75719746987	89.5021549065891	74.7928709202737	547.854729070916	524.768327007992	93.582448476989	102.30443655145	238.68463810432	181.669193597262	111.43598061108	94.8450150852204	245.071984342097	259.918692076261	477.74828630155	485.639542520947	99.1507501982435	93.4763424407898	197.274399885098	193.055683853446	221.987672469451	236.146694783223	398.387847626692	355.294020183301	409.574510047591	483.308860414462	228.588686864504	209.257667063682	240.209096798492	249.449571931609	533.813374846922	449.09454723411	236.861563283553	271.676661375245	194.049993145285	219.828466027802	221.631180663403	260.281799915002	59.3844946154349	53.1408644727564	198.597365253877	235.879470572459	224.084574535129
ARC35	53.3343723405195	57.5686770869377	66.1031440238818	59.0772761564517	95.2809306720021	88.0271416802901	190.494778795104	149.332148631996	91.5110129191051	76.4713675083711	406.082329348358	399.141422250124	74.3434270253893	86.0021351743578	160.780681185674	180.044685118176	86.3211691170937	99.8377351313234	214.352668170496	193.937487823903	355.852967211765	375.35685092885	79.2273349897882	81.0801386315801	137.284661373174	140.709006921489	172.526201283503	207.955210783497	255.094555210413	267.664964872693	376.191900768976	342.870229735709	194.095510642519	180.731971338861	195.76983780643	170.945539257575	297.433674477575	295.415397022043	166.19390224507	176.089004807627	181.674745707251	185.864291439917	144.240604991035	191.562089171263	49.1154257447161	42.9971219586758	165.193926614821	182.288077038474	180.285894627505
ARC40	34.6863373788202	35.647352001592	45.5243306086188	47.0412401862655	52.8823005274159	54.4668337319449	113.15229437357	82.308864345902	57.8086545346488	17.2326026034764	203.795133004941	187.62265014274	18.3124962607961	47.0470065686817	118.31343923825	122.806034698722	55.7043663836466	48.253019447679	145.985006318174	41.4753171496161	247.110137904117	194.777522088636	44.3030676444873	51.220749661227	132.778378438942	136.352148831958	96.1782583426336	94.7150608878745	163.737367188976	104.340728370881	216.717729577175	231.017256674223	90.6475050391429	102.97474860092	116.523788870381	130.399272199043	149.825110674575	140.848875450835	94.5667099268869	112.447963332862	100.873479590365	99.4899723912599	98.0906776819618	122.277599521079	34.329303306832	35.8329795967611	64.4075054001419	86.7647163460069	68.6740704779004
ARD1	41.4106198716612	52.7047845278619	65.7371049686276	38.9988765413514	39.9447993945299	49.8671432290542	65.0410733119837	102.683479681444	48.2934338852326	46.762231917364	56.3236197233865	42.9210824107781	56.9069740738654	45.6653190538947	86.7523233182746	93.7340391503209	56.1942352273818	49.8099551612828	87.4292286441524	55.9488839132517	31.5542283184808	28.7475079889947	45.9967335355561	46.811573125976	128.654598164381	127.297512043405	89.9933708979478	123.604857371422	53.4009530855506	48.3700354503434	25.1576103603086	29.0782505548444	65.9681527742422	83.5848743847368	97.3802803166157	91.2504783122078	55.5252652973555	52.9465134868019	85.8664822788659	81.4227861322539	88.7818638036556	79.9956737037748	86.1663165834991	72.4928135220889	54.1671736922119	51.0573034967853	72.4596437945295	99.3027367687286	66.5481405433158
ARE1	10.4776614530245	12.3340978333972	6.38840322514034	9.60030975613152	10.7478727818665	15.7014970140733	15.0900203444447	7.67189720972422	19.7919025829592	15.7323704251726	10.9425037194334	12.3392801228426	17.1128319862025	14.7952779436379	17.3347583125134	20.5541861176093	18.9947384588844	17.5408032273275	25.3388256689948	19.3780964868507	13.7039879669553	17.6918490039313	13.1128662069184	12.8092512372824	28.4658381375321	31.1746291754239	21.2519100180881	30.9062698650713	20.5051101348092	25.8912085017565	8.31737808831359	15.3686202519673	26.3347939106232	23.5684810033352	27.0845487947347	20.1495109025389	26.0004212562337	18.4259539124651	17.8790091283053	18.5777390038401	22.2927445751285	19.8852445332096	27.1308952285606	24.7277053687925	18.2398126829552	11.3957928744645	18.5901178044548	22.8299677656346	19.4570334485842
ARE2	14.2920625362708	12.9182796381116	10.617820146405	14.1260763283305	11.2294645114126	13.8050079009732	95.6798482550202	61.0643179237775	19.8300254810192	15.6186548920728	48.46055920587	58.8174193356532	17.1110053391734	21.2529262986186	84.330358446592	73.1614359310387	17.2004087110699	18.3184231754779	22.4514805719817	24.5380544187722	48.5297381409898	53.2298698229246	16.6339431985706	13.5876489164677	57.8984627669862	63.9257844998012	19.177157526603	24.8622895806634	24.3985010691828	24.4501669757327	50.1189525165177	60.2147842097391	25.5696383526451	27.8209165268986	20.2686238625118	27.8373846196851	27.9400163590947	21.9577053566879	25.9436436973106	28.0700136155229	17.710429121343	26.9158160803635	37.4459092217345	27.3032632936241	12.750714100033	9.8007106487361	28.7271706019205	32.8076684609787	19.3164104708781
ARF1	437.083299099638	417.770474950428	450.472360147559	432.938914321174	375.889859571357	406.721059249564	585.43800354614	553.512641243981	420.891191029167	437.247373350361	395.510060717176	335.943277325249	431.650531210382	446.778239371207	603.164856925481	685.51154936171	428.946219094089	411.963727908099	763.109293281271	709.233857573634	357.475311647826	364.613609077057	397.235154853345	439.744910435923	618.136052271809	700.218741965488	805.531108424557	880.784314903972	457.217683687823	486.175567740173	322.684043922621	310.031199493259	804.078525926312	862.771586135027	832.696027031837	915.577025278387	352.41296437329	430.588723181901	883.005630624433	870.96760957845	866.567360756332	871.634514496362	812.046046518622	850.075309921037	355.513533891494	397.518015360228	835.395355858395	803.973263481289	886.618325342674
ARF2	22.6586843776111	16.5159403481245	15.7914090458129	9.11901974574894	23.3442213907887	18.4579811445169	46.549012503322	52.1724645003255	3.52441624461572	10.916437159263	93.8957321037848	183.489558613271	13.7951428049022	12.8424718224161	49.0110996665154	42.1280190544699	16.543024862488	8.42987857538233	107.147595347113	84.1089041691584	128.999876984136	80.9094219158212	15.4463174250017	10.7795057462844	19.3525286108167	18.4817988439567	33.5650604413053	54.4505759347781	123.640644891969	143.73964292776	93.6947975149282	97.1535168405909	10.2052442222719	31.2755253827934	42.3553586082047	50.9779034425909	129.510428616238	137.582193452726	25.0813875174935	74.4645470754451	46.7102887094266	35.8237252144212	77.7079697776562	59.4773887022427	0	7.37713568306876	29.1408995544668	43.9085478635488	23.446293225361
ARF3	19.623821168232	25.2008572484274	17.9474634834693	32.4069448259961	20.3440813468793	32.1118282268985	12.6171314735128	41.0538502398633	27.1234314498891	32.109890926194	40.6356149049044	41.2686616233128	17.9108553261562	26.3443671030555	27.0555328481578	29.6125975382677	19.4934924690718	27.0550107768828	45.4069667640082	59.8019984140429	38.4997049539144	38.5295709858844	17.4114874116734	23.8263710449671	25.6318411590588	52.1315896804755	30.9579845486602	66.9966082065718	42.2449083667691	38.0330324027433	24.1084612274817	24.4971811390203	50.364984802056	45.9811241220764	35.8918617431761	54.1617357861678	25.1880205182717	26.7044367988501	51.0457421080972	41.7535561348381	34.7938213275681	35.6916609688584	58.6315829924038	58.7819750109248	18.8554960463668	25.7265311557314	37.5874567053175	34.857607503968	44.3838886111302
ARG1	5.37261284461046	3.79470916362001	3.93092184459234	5.15169596640445	28.845841667683	35.8141099619437	4.9742235140153	5.0578754034014	3.34163674353206	5.27460567305896	6.96536898235668	6.32715691139044	6.19404936978295	9.93730262222853	10.5048629000239	9.72878391225914	8.40566363606252	10.4757944368605	48.6031934236026	18.969596222553	3.16213107770603	3.79750352114327	3.31175847717598	6.20828255204562	13.473594966904	18.4973573095401	58.8456409683624	80.9995178101942	22.7110057245509	32.7999615422284	1.82780645106968	3.52109403257483	65.0454353322842	84.5962117642321	72.322870654531	73.4723963154513	22.7566811274907	18.2216099552731	95.2557877861888	103.453232642513	59.332459768539	67.8066213054067	74.9097197065502	100.07146585812	4.00833439678866	5.32166793975768	98.140604292774	116.046635232381	59.8617642195062
ARG2	4.98742303543905	4.80361743030908	3.55786407929811	6.45615089438735	5.63309416561166	7.53840739796977	10.3895873873892	2.93453742591548	4.91156924708407	6.04857125972125	14.548439214383	8.18102355080828	6.25311095705705	7.81136835072611	11.2519389064959	6.7734896978873	5.85227411823067	7.29353479117178	13.7365779772482	14.6222635712612	12.4755443084151	11.4570466813217	6.70759291626594	6.38959369583158	5.27662663896558	9.06258672551218	13.1508185871497	17.1634683576669	17.1297499075306	16.3116419510638	8.05960717568819	5.60337563388852	14.301051771957	14.7245405456241	15.8721966819772	11.9890738143517	21.6052359942943	16.9152058528833	10.7419031022884	15.5196390373843	14.4012681725191	13.1333353651514	12.666085801654	14.6678777253205	3.80552016000712	3.05126856491685	17.6477055552753	11.1624662862684	17.6327543761124
ARG3	0.933134902233413	2.69623341801861	3.0723070533933	0.894765324493627	6.41527232065463	10.8494084853503	2.15985146047898	3.29427178864228	0.967311090913749	1.6166741746693	3.02441572638703	1.17742276459014	1.21028373618555	1.25270315845025	4.21043114219156	5.28040325410871	2.08560919789704	2.89461686903403	20.6860838372896	19.4152552829545	2.74605290120605	0.824452306612087	1.17654063261054	0.703224003469508	4.38776588094924	4.4620655068031	26.4975257756094	20.6437371540507	17.2573637019785	23.3976701884802	1.58730033457237	1.31047782637558	11.8919952148958	15.7424687875597	24.5764357165355	22.4313378352933	6.28801768824014	8.79108930891359	13.9811198626377	13.4016335043714	9.21784114298463	12.6181431414005	34.8499316462988	23.6317257976095	4.74670379083854	6.11662054952526	22.8589513728501	36.7968835038576	8.99740791203669
ARG4	11.5900562473523	13.0343136762856	11.7700435705777	15.7776304441892	27.5483538275382	31.3079538353079	24.9423243568587	22.1546281742418	13.7929586487254	16.6402601132393	73.4138899386212	62.7557171191847	20.0023108215305	15.6645441141758	30.3406641477935	33.3067778643225	17.721375637388	18.0626763832358	46.8324680478813	55.5267032961595	51.228740580464	52.4280836791973	18.7857755516901	18.7339943211025	34.8191044650449	36.944722684212	57.9706327083524	46.414719897405	70.1087521698368	86.7141293878002	47.3714478735606	44.4468209138778	65.3815032367379	74.4944689029975	62.2831890480482	59.0618704079213	88.9210382934606	92.2422863697865	69.6866477152086	59.7730632243233	68.9464007168195	64.754504831673	61.8641742361629	59.6096846015464	18.6269091353818	12.3842330237576	53.2351167027315	68.0156899791195	60.4070677606467
ARG7	11.155989494951	12.698473475778	11.8725700438212	14.5872011201344	19.9213522808306	21.4871049506386	29.7343286875778	29.4387717684505	15.4194525761965	12.8853049075814	49.8544043254418	43.5093545030533	17.2463709546174	14.522738498822	31.2702069814404	40.5559592779742	20.4007864327346	14.6814505867288	46.782235128516	40.2848183404491	35.3173378497631	40.024140422368	15.0605555758806	16.5598636257929	43.7145686869949	46.5563427861246	54.8552186837016	63.1550026118275	47.039417750258	59.7048256364012	19.5518561647381	19.4654288501959	44.1598569344172	54.1809323933949	60.8418486193948	53.6351180551201	61.8328634823061	69.4305952380224	50.6515190674079	48.5520756747154	49.835253169316	51.9691432752513	52.5224825372926	46.9496196188436	10.6618869580864	9.15927712783629	44.7811448633295	52.6032169153088	36.2180560347351
ARG8	11.7201232240585	10.2620109768809	10.1342621201952	7.83268575260898	11.8596243490043	9.63511220067566	12.3307342675313	20.8969024182933	10.6767370366419	11.9986116368286	17.2665818206294	15.236523315084	13.819193657452	12.3964014029712	18.4288763907304	18.4897191037221	14.6851661745398	11.9613596325881	27.1983417710794	30.229943906195	15.1548238867955	13.1792669954429	9.25445554269994	10.1706917799933	15.8650446940599	21.7380052318595	23.7720192778092	30.5553988846309	21.8940803531433	26.3285537160911	12.6868227524513	9.47671378064269	24.3280036894336	26.3632836050171	23.3847883143349	27.3198675661979	14.3594528665866	20.0756182453779	20.6200077241952	20.4028802273692	17.8116457717909	18.7045366595904	25.4669610480211	22.0506414871408	22.7633727110934	19.2448703306468	25.7784183110735	23.4679578378521	15.9808113259974
ARG80	13.7964058983348	16.6099735858446	22.7121903119355	19.843660318479	28.2292474261637	24.0612694424132	23.9500933402631	16.2352787774071	19.068951793532	21.9106603719444	29.8106736813758	31.9150474981326	25.8469724322937	17.4922732752398	25.9380145830226	28.6260814834389	19.2723406760748	25.4743628592653	37.0719543639983	21.7465845933953	28.7586518695123	26.4107786925706	20.2943370165601	25.1264565971522	54.0607024069556	46.1802083454388	30.315243438499	28.2609013457044	34.4249912560271	32.5880280483532	13.689832343162	25.8339126272771	42.1242685255487	40.7316960372702	30.2802354771043	53.4320935436376	46.4841924627542	43.3254867712128	27.9921493397918	44.0318235260962	20.9670361724588	39.2756547796084	34.3504628520413	56.3540189683657	38.5990100891571	30.1446520335353	31.2935063300025	26.9570851104233	27.0980679073213
ARG81	8.24188689480459	7.48882521782496	5.97336646625203	8.20121206260407	9.77470462585786	10.7277848382076	14.0376653094376	11.711801342578	8.06012749310666	8.08258059413905	25.957014917308	29.8250938509124	8.6056109187712	9.4639552397679	15.7875689109319	14.7837278102901	10.0794512923411	8.54516491376242	12.1179284241586	16.1778182811221	30.6612587799888	30.5018170607188	7.45067760352143	9.02382215945799	13.5276155089804	14.5746730777614	13.8782827193119	16.0546829472829	18.6251470741302	22.3781718180372	35.7107545257654	39.9656371519611	17.8362296679961	19.9385219752892	14.6761439289366	15.2019794634237	20.9579936481158	22.2685876163475	15.144730556303	14.8892214941548	8.98062194369512	18.5933025711545	15.3324907147379	12.7039658640862	11.8656075550175	11.5524525168523	11.0051047887997	15.9106273585451	10.9957317921554
ARG82	4.82926415903805	8.03402624650567	6.74553562619809	6.3145653171327	7.33010057216686	8.50740036956213	14.2263956191516	10.33263829762	9.55716414292447	7.22586148475435	14.9407855648495	23.2661800762008	5.69415696615376	12.5733276113932	7.92374033677362	11.9248731473415	8.83117425746173	10.116719742048	20.0546698115126	17.4386291737955	25.8393592918641	19.3945934825131	8.85665266385754	6.61708335646205	16.5149074073989	18.4740439974748	16.0285166925671	19.4250310910481	22.4246137630728	22.0163179516149	17.1763203032884	13.5642422931436	10.49055465308	15.5537707343318	8.67210256496968	9.8499870390385	27.8934468892049	23.9891207444074	9.04460133118286	10.508730702117	11.3424531770955	9.99847542091611	14.4287124720752	9.32502180993987	2.23324019517959	2.68590932689064	9.55977395212572	14.9727779717004	6.58485437421475
ARH1	9.20051680055712	8.86145313972534	12.703265472614	8.82219479493041	13.4085592685647	14.2630367645102	22.6696179896241	23.0509158326785	14.1524268465549	12.3407178608799	41.8444067572755	44.9386787161599	17.9638834429402	12.4842171109081	17.4091017079167	20.1537642956386	14.2619064619752	13.4152598259151	27.1149994304875	29.19177767409	46.7271675604503	43.0048088525767	7.73361539620621	12.0779601450121	20.9334743027742	11.3535829758148	26.4872158492247	31.370431846274	27.1827852417721	31.7085571649349	28.7766619289663	25.0084839268546	33.5682681943226	27.0378777606717	35.8267416211448	28.062214110289	34.2849234183489	37.4674251424023	30.0159781732428	35.9944337229712	28.8670449652402	31.2615010523511	36.3565231460725	32.9745452621642	5.43502153763874	7.26297165549936	27.4662468035334	29.7333285657811	25.4373296388008
ARI1	27.0941188637755	28.7052416289927	39.1517416921763	32.4750876171882	10.2005702459118	10.5006092401518	102.430639538872	87.1487027506795	36.9805953919263	41.8557270094297	90.0108347541457	76.3511156758849	45.2930969099347	51.7304150814236	109.008450514129	105.279760226265	35.8294337187789	41.6232509395163	20.6277681478238	26.4783844567784	136.87541944852	141.237522770266	44.7894618713892	41.5176364567859	108.290861818068	101.05589191029	19.2343161858344	25.5301506733622	25.4514996423852	40.3680189668422	146.714235780964	149.665330967023	14.3870723325564	13.7127600829395	20.8130800432414	15.9208108339525	36.515261248819	45.0949899008483	21.1432331906628	17.2943967528559	8.92150466893147	14.1407908991407	25.6344909607377	13.2804912225768	37.212399709863	33.5465094207043	13.1105562788724	22.1384090466546	8.70817087247321
ARK1	7.08537942494556	8.10383841950579	4.61708959543984	8.49256035205643	7.39377261847211	5.14879231172864	27.1624799307352	20.8448050823389	12.6240502398715	6.52141224408977	23.6823830938628	26.8209149166999	7.27525835218678	8.71924811236859	24.4772328755474	23.0545078555988	4.70137850766813	6.67222241719842	11.6018884575198	13.4020007512848	30.9508571541698	30.5183869779395	6.70019930152476	6.84142320351969	22.3846825369251	19.4815399960804	11.6767127913637	13.0625233425971	15.5996161675388	18.3453934707668	26.3649450599786	24.8764672234384	11.2871264157987	15.3153365931091	20.410668187671	23.4194637518891	16.625700488574	20.8599443611483	11.1966063579668	19.4333366605838	7.06650678800514	12.606704919099	17.2002873057609	19.5355955879997	4.95579663587395	5.41848531624357	9.2409956875026	14.630893996821	9.96307263456883
ARL1	52.3301733250688	50.4017649574063	68.2003168149678	74.2223900699535	33.1931055188691	45.6326132477037	133.741769096402	112.898498698127	65.5481288648425	64.219781852388	97.1719269732603	82.5375742694941	67.8726683071685	86.8388588921838	127.898866000144	113.514907183554	57.2622322349446	71.5026746729086	130.361909799469	109.293077953018	96.2494169526629	82.8384570549552	79.7261399271485	73.9438422556398	169.170494481877	135.542523350191	70.7613517423442	120.594013029659	90.2504216670799	104.591038293159	66.7617155551173	78.0849363875879	95.5196882199277	117.711695475843	100.49734843015	113.564851063419	107.049153825645	98.6009974111387	114.342308092081	107.863552206813	107.695172414202	124.144588341797	107.491196228918	108.657647699482	59.8938720269996	60.981207264461	134.52378755396	106.896746416997	116.799495257118
ARL3	11.5840823987353	19.525079645994	16.9512286688264	24.0668224216435	11.3771962050568	14.2168776946185	17.8751662142232	11.3598877383219	16.0111465321432	17.5609636141696	42.2388742462685	24.3612045842134	19.1981709816763	25.918811952208	30.4902614517098	32.776035029427	21.5759089304903	20.5338622908054	47.9879449380266	32.8669859653432	35.5104240416007	30.7047985466732	16.2286146761523	18.9148554915209	27.2352178648613	36.9285789471961	35.244136120709	33.2208121061159	40.8067895924652	29.4671878396718	19.7049873999611	17.6241800131316	23.0670277573172	29.3144391871105	42.3745049407014	38.6758640455567	50.1817683982051	40.0158804507355	23.5035038758017	40.0520687308688	26.4073256511844	27.4813784573684	34.6106789097899	20.5042032776557	18.6600237305273	17.7176044324924	31.530562991312	51.4417667651198	24.8212120248984
ARN1	13.9976159812979	17.6132807313171	11.6455725229051	19.4836392383475	8.42596026567835	12.0748536043463	10.9739263497385	12.2211975163542	40.7225640932999	32.856422534655	29.635711891407	33.6149743634571	41.3857328558781	42.0281029201127	27.5048255421171	32.7059699687147	55.0018458894871	47.2229566272046	55.812305884798	64.9101928489045	18.2709122853272	22.7399855757267	35.6773598182239	38.1119005311647	33.4404297057944	39.2966847087441	25.6438852386766	36.6275836613997	50.1041196864193	48.7335491968869	13.4414194504669	13.3167234474717	13.3071135801362	17.9015023980462	48.5604082239576	41.2464695253296	25.6457870813795	28.0759998882471	21.5645566555549	23.0575324904454	15.4399694728073	15.7465494097501	44.5199113112132	48.3228866489261	17.915755482755	20.521112767365	21.30314701107	25.0242350734681	20.8013448880705
ARN2	10.7454231718198	9.68882957239351	14.8039698298278	17.0995753552447	7.40992587159882	4.78476115262615	20.6381465472602	15.6044042607711	62.5677875604413	48.126028035354	108.928176563747	92.3130323251496	86.5866671202539	77.1399995110014	108.833176740521	81.7649249217868	102.964862915486	77.6073245817037	75.5631234129027	75.2456377618655	84.4373397991018	71.5072304540225	79.1761078019386	77.7053383749778	94.0662686714712	116.758724447012	33.3880822749187	37.6532338175708	79.7315220755007	84.7435197079078	63.0019934301812	50.0880153917532	21.852267840678	14.6567488176667	58.2071099439761	82.071620434472	64.7059799186362	52.124233940455	35.9677711333669	29.5516358508538	13.5507013873986	13.9933532630535	64.2095930141963	68.359011610211	16.2817730016518	12.7882357914253	25.7214478983196	23.8790488648652	18.6153059179831
ARO1	12.8003530400891	9.28650759528478	8.48368807207004	9.00628128343227	18.1229044901577	17.0732959217976	21.3552478390512	20.736299756155	10.5981102897353	10.0084063499092	19.8009566981761	20.5563254552773	9.70256781268344	9.67069044996665	22.1276993217379	21.2600415578135	11.8896854881051	10.1662200643603	24.7915921970052	23.7402187087311	15.7770523320896	16.8908666248453	9.9909915997561	11.212520742542	27.7497598549389	28.6171393328097	35.404180366557	36.7769433001918	33.3792602637827	37.3335589196683	6.22113158104023	6.18677371138129	32.5728874216718	32.8130240495398	25.3577077443398	32.5020621139521	42.5681597436573	35.3947647876493	33.4694645477155	20.6917312111304	26.5272479262402	28.7498668168146	31.5393756909627	35.7171045127985	9.47105269825701	12.1317374278589	32.1261918572393	33.1312981517702	29.2083172239487
ARO10	4.67433906019418	7.71786566108302	4.6414773917183	7.68368018253563	10.2748020240345	15.0103561601794	26.275535213662	18.3355527018282	6.46073764493892	8.48404243152088	612.140652884086	526.331571921431	16.9369756949468	14.1440260650522	16.0695548209921	19.1456281649328	19.8998703653771	22.2925125487876	84.3338270575153	124.202197570486	477.523235472767	493.232645259314	14.2195583048384	17.2777680103786	27.7361934994038	27.6736817834547	21.2193776597032	31.1873095971294	329.714750644394	379.038273341088	301.390294935778	284.464563313525	13.8288469802937	13.8941472635445	68.8833082679716	59.2146884968892	509.976335316382	471.407805702375	25.8464787617544	31.6127497800429	11.5014275456312	11.4059539219975	68.499418722952	77.1006263018758	10.8697899055898	9.14332900449219	18.5796625601667	18.5038161706666	10.0156931698291
ARO2	141.577249983631	153.306219933917	125.740634589967	151.450129612186	127.79601776675	141.773500092971	162.901456243955	182.013066115439	172.636927587454	153.125910447325	33.155452029873	39.2390789759613	171.951141319222	170.653945586763	264.019210123919	218.581469439367	176.507385640925	173.349953308382	179.769189167144	170.272942418017	34.3183965748608	38.3217669120821	169.220565215742	176.693573334863	413.670504432865	358.45485388546	263.093295546073	281.628656049612	89.367225811683	91.0012677648438	28.5375069704268	24.1352577956411	251.608002596595	287.860070985145	257.746346661391	231.479093060253	74.0534518834563	70.1594354535165	252.894328471964	267.061336794307	236.926660197893	263.841486189858	209.055543348896	235.999273213643	158.606252262354	128.743311219091	266.556986557843	269.507728813462	261.272768289185
ARO3	43.3977885231799	40.59273835134	36.179451256854	42.0135640998306	46.7210629432312	57.5737387562156	112.039861498353	81.514882882263	48.4479188316196	45.9078836456016	90.616323388057	82.1384479086161	42.9369990071026	63.1150943603853	115.795415233499	115.233503029883	58.2911345101175	52.5171228180448	97.5512517048268	123.919963265088	81.0479753941909	83.323188961712	47.3521415522159	50.0010406018199	123.615945971426	125.310027803527	99.0271100218968	109.753909078844	108.041829390129	128.287486903455	46.8481994436614	72.667561611725	105.694157384494	130.237103382352	103.491857424162	131.740553267682	130.955481265606	162.754386443703	114.884316576137	141.169274632198	115.418860770516	130.078822022032	133.403274538881	127.495278599002	77.689675711743	84.6111735898023	125.695507300424	150.319764443966	109.976416110092
ARO4	196.124412334699	196.935169669007	175.401561900681	191.66144307534	195.490694583652	216.386711813874	464.580414462785	374.182033703215	161.781176274228	167.002931087477	27.0496583661252	14.7428240885074	157.676448316242	172.913214717564	444.353615595991	442.042970357343	187.464276737649	170.495717357922	259.015660851031	187.063418660769	9.82402512072803	8.84845945198822	182.743750635029	179.24942206253	426.768649285936	482.882585004338	473.128932112311	485.173441077961	113.186414452981	119.188688031068	8.51784989494867	5.86027435115614	462.661318039522	494.900660540547	401.145599598181	353.760438718639	71.5031238328425	102.212954866173	475.948445952862	456.803241837015	459.773470173926	450.226269213399	356.572550569651	386.577516592963	215.238539203277	194.386768326392	517.927197356282	519.448116157157	488.188397983065
ARO7	44.1563685562379	45.7510682284177	46.9927069401025	50.6805699973388	24.3122142326888	26.4478149794645	41.8112675594182	53.5366839437962	37.4512484543956	41.7281533659423	33.6107897668823	18.5720524356858	54.3787285267761	47.3030877615514	67.9224569540521	84.8052480919801	43.364647214734	42.6933701342187	44.9437342286927	45.5573618784759	18.7041351307342	27.1912959873279	53.987382667086	52.4362402203132	81.7938593935681	99.815116473173	44.7812988003561	60.8489749345145	20.032655782874	35.0099259355983	20.4850559276265	27.2478783773964	38.3682154757717	71.1082056290467	46.9886581146709	60.042300449533	21.8977775426288	30.2544596291203	63.9041222420257	60.8550341454716	49.8216576025583	53.3293997576571	57.9689418297322	44.8179945256219	55.8137893407291	66.659229886449	57.0589622718821	41.356416973893	53.0411979920242
ARO8	68.9103186229454	63.8396621245882	59.9257907443133	66.0768027154189	68.5397167417981	69.4833000324927	143.956387278138	149.126468842294	81.725582040883	78.1588958588393	70.0329236813244	61.8969678861258	72.7135596989734	83.6246083241528	208.82527118629	184.399729106164	83.535373262092	89.0242683835444	110.237009696638	97.7578291260611	70.891011066596	74.8156493737361	71.9134656647455	82.5186472409568	207.323298183606	225.075883931122	157.538346124102	171.542442469576	95.6586105138307	113.323999586833	57.6163778959656	54.9490839532961	159.080868164974	170.934294316259	128.813588136643	138.97834045501	105.689378603256	100.131897734743	172.80927002302	168.209327858572	145.551793644692	152.533416591381	140.457785450465	135.967555450829	90.3073997748501	80.132204487547	163.192494136799	187.341272315883	165.172191319507
ARO80	3.72264573072833	3.72335794379915	2.51418633856159	3.84416199378251	5.2029941976507	5.10512363080217	12.2619749254309	15.8380006686359	3.71057337355946	5.58134690257708	22.739054941922	22.0407491880145	5.57110737992104	4.74124257989564	10.013641077365	13.6116894839896	4.16015340183886	4.44146246968451	9.23357694570133	10.2912610708277	34.7613881100886	34.9148559097839	4.57334680392362	4.53185052457842	11.1086412626523	9.03742005391027	7.84109966039698	12.670143863965	21.4357300354401	17.1700655545452	33.6103044159565	30.161625724149	12.0885602102035	14.2514384702874	10.9986925970211	9.40765746257748	24.8097351820286	25.6289776421625	10.4580647162786	7.76833427731973	8.70383495701424	13.0432462473002	10.6946503191087	13.8022591303691	3.35029574463215	2.50272672860284	7.53449711595671	10.3765653327034	11.351159132519
ARO9	19.2766961300002	19.3854048394423	17.4225705857893	17.6685928997694	22.8302708790891	27.2467954671582	95.141872207022	64.7172895181206	21.1581807378333	19.3998586571208	796.14042128333	783.348238940224	23.2862070327925	22.8338392268246	42.8499761330676	48.1248375543616	36.4318480042428	30.4010337452363	122.258184369076	152.28204602916	1150.82585347043	1198.72222043369	24.0666648805777	26.4907477242191	46.6541579489832	42.8353821081162	52.8986831201408	55.049374454987	423.908142929501	445.645278892682	1469.29920625347	1508.85712133146	51.9327495906706	37.7814820069539	93.9491897585946	92.6772691028913	654.946628722194	651.646296412327	55.2160126698678	63.7842195816232	33.1730891262563	46.4032938095955	94.0146071869712	107.919045032965	44.4143178146245	29.2356090029215	51.4401219563178	51.9657955123775	36.4447716360332
ARP1	7.57824662117193	4.6098741428252	6.56609208691421	6.50173085027361	7.83464142185088	9.89315703869668	10.1551868363472	18.7745415224431	6.61541638964574	10.3653585333574	12.9274394417068	16.1047486614279	6.89758524068617	11.4229475920535	12.5978138595327	30.6957533304076	10.2518235215152	9.54458606986393	16.6121880895228	21.1241901644607	11.1507121218331	10.5720399831946	9.05210815069401	7.21397302851311	23.4435929088524	18.3095827249135	17.7979778405873	19.6086263715111	11.2402377964892	20.8716646200332	7.46314600162839	12.8833534225762	15.8845246629419	18.8408941446847	14.0064741224106	12.7839477591271	16.1263611798135	11.2729077975445	14.1930760259145	13.3661101483136	15.7601216293188	8.51596637905011	15.4919532819213	12.3818876410726	6.08673094760384	4.53172058716271	18.817679396972	17.0035528597438	14.5286453796644
ARP10	0.582692156339991	0	0.63949999241337	0.558733030668834	0	0.903316202135314	2.69742575812381	4.1142116017879	0.604033371825678	2.01905330041691	2.83288334514192	1.4704731368216	1.00767813654168	1.04299568002415	2.62919310287455	10.5514978644371	1.30235215790793	1.54931330720876	3.91434785322006	1.10216193650586	2.57214549153562	2.05931302187988	1.95916267469448	1.75650197588864	9.58974817886425	1.11452751184277	4.72751791799999	1.43232700640245	4.10525323723141	1.27048552380989	3.96473782574052	0.818323946618103	0.9282366493555	4.91516612682542	1.27889029248827	1.86762394700871	2.24372905142555	4.39165526750038	2.18261969298702	0	0	0.829407536018437	0	2.85614388238638	0.592812013828711	0	2.11469584637446	1.24203627474014	1.24853402397004
ARP2	47.2185831055659	46.9820533822579	56.9612741966936	55.0061229537871	62.0893934301355	78.9476468409779	174.327328652214	148.787774577815	73.6242585620732	62.8765894423064	264.977766877003	322.028452168412	82.6696163016491	75.0896235779794	158.472075196143	146.629156270334	82.8592120950743	76.7819293667735	187.698685997593	183.794923560701	290.544947859205	282.035448109787	70.5239942087424	67.0519376649484	178.908884859474	166.450219979729	140.890218881604	172.664117983387	222.69654155529	221.223510937574	235.651956426513	243.330333860954	152.30501257788	140.886607836315	162.733095238383	126.327787862272	267.472649722049	234.556231415084	135.940575031401	142.604852089982	148.26528124447	152.752736633675	144.576253673806	166.413409945314	25.8058394325041	23.8743406461217	135.250853776653	170.520603498589	136.29371991496
ARP3	41.7033878245433	32.1971117927861	34.8716612341983	52.3662207468643	57.5372080506106	58.7500131721525	127.937630944222	96.59314099836	54.210096589957	50.1751091232281	274.087735463442	306.539086069055	58.3826834616136	48.5800409457713	139.635379983598	115.373633151307	54.3721837602363	60.7225395066039	142.743516146017	129.591763585794	293.665982429798	286.582901138098	53.4162259283299	53.1289179729808	98.0485082691497	105.7229438591	141.650375630074	128.546260781501	199.37376564722	235.260785146565	273.060015561775	291.443586924206	131.28660988582	134.011064446909	116.955852125836	144.805217228606	287.3949223703	288.118933961493	117.158108265344	116.197168835568	100.098063472529	119.663743458577	136.467099269513	143.847763659134	39.7339697989207	29.5057456767962	120.719131077752	124.167801308982	115.597817130973
ARP4	24.2386685955049	18.715137333869	23.2459232304887	25.5177086364769	23.4878494262761	23.1989867421829	47.0772911289958	58.9783717930901	22.8693645310746	28.2270798344745	60.0780991921119	57.2713694887049	28.9307677644593	25.9688484909047	45.1711472035114	56.2172019272136	24.4127056409281	30.2168329002465	56.6674629614312	60.5139929914598	79.2877564119251	62.4110878364134	25.1338275453993	29.0792476443686	54.7875064363437	57.093715976556	46.1069523400635	37.5290630964847	53.2211728413454	63.2260953255217	67.7310462826564	76.0767457932936	52.3885517040084	56.4427059183921	46.5916117505081	56.0631666125705	58.0847873205655	56.3345121143282	52.6212572167794	51.0256944072256	43.9195407854531	53.6940586796521	55.2508941280886	54.2352081864668	23.1541654409598	24.837116584618	56.9528095365072	51.6119126155588	41.6647086304974
ARP5	17.6411699311633	18.583965130245	12.5039874141346	16.3871803304378	15.3408333634588	17.377441913688	25.9457304982282	26.8146507149686	21.7161537861278	21.3309059005116	41.9897368847992	32.4617753056749	17.7961363574349	18.0909853495357	30.6789652936858	29.9483593184954	20.5359594316951	20.0327190395158	41.4777825372259	47.6193361345728	33.5284310695426	37.6675024940592	16.3731862501093	17.0337418284908	40.1798229179228	31.9852301095782	33.1725887876854	29.3610539345271	36.5742243501646	41.2690018966313	33.1342464288074	37.1624525469963	32.7864428134209	34.7218264288894	29.4423716346641	42.4070807669635	41.7483638538245	43.6270318152084	36.481302139144	37.8283066416534	30.1613898018379	35.0500711417858	30.7462437421469	39.3320454671379	14.7693626045613	13.4908855703921	32.011504228568	41.1283237231875	36.2246901423324
ARP6	11.5869952670692	12.8011859283561	13.8386750882413	13.7248162404924	10.710652341005	13.2078647515139	37.074076753933	25.6664566314602	14.1310536604239	15.6464557856204	54.6758164729671	49.881381752184	14.733762613156	10.3701373845138	28.447661867165	37.7983486277548	13.7104930319473	9.36336752426925	25.6407021641558	27.7183667042063	48.1391760296103	51.1875038693664	12.0313123991185	14.895974605946	27.2420745066479	31.2885620143039	29.0318979904844	30.157579545837	42.6177722237128	43.0973266525342	35.3620056439781	38.767059198005	20.6298141596126	29.8967612686009	26.1790797605587	27.8536314668736	41.9926703575236	46.2331897728604	29.9984620454044	33.17366231546	21.7527192872597	25.7096083166595	32.5829486657131	36.1930137971999	10.4014006664567	11.3183095305865	22.8808753800054	31.9624553008603	18.2554558392213
ARP7	24.0531830644799	22.5727455749337	16.2450042877062	24.5426105325891	27.5609000435589	33.2249741783661	39.9710662278533	34.8371888595915	31.0077311744482	27.2474723083322	44.9767498685034	36.5757890971402	26.930893708771	22.631045940606	48.0040721672368	50.9548154030024	35.4956476323886	31.1574267388688	48.8888445061915	44.3300123892591	40.3833927562569	41.4137258310871	33.1785820933745	28.8168569244178	60.9011821094247	58.9831672514741	67.5513855430769	56.8513281336054	35.3046149106142	49.0829871600026	29.8997244063763	44.606727767411	61.896869098666	56.1862715226055	44.6699751225886	51.8903532551774	49.8721713644747	51.1316005889015	49.0913718822066	50.1936885976347	39.8353387689109	61.4515869698622	39.6181450566046	51.3922108382892	31.059363621062	26.681946421915	54.2787207805572	57.8439024563862	48.2349378129636
ARP8	10.0955326241362	10.6210630310785	9.20472726204066	7.8932823606283	8.99997578657721	9.87190185845794	35.2307814828646	22.2982345423808	13.0413810789105	12.2435135183642	35.4897971166837	37.2356027069313	10.4752118295208	12.9274389867469	28.0322857865403	37.9686067252857	14.5798769520804	13.4902851224617	30.2575804455631	22.3273217318388	41.3647132931914	42.2659018350193	11.8803242237968	10.0661573420451	27.387141456449	26.1427092610056	19.2167412336034	19.8527696607323	35.0160057210473	33.864675047173	40.1582660941345	46.8964641883788	21.0307447724935	22.0102128120921	23.5211847538019	23.8950199632017	30.800274558388	39.5074388294382	20.3621130369649	22.5542397511844	20.5355878935929	18.7915825806824	28.7710395726371	27.9143754275829	6.47856167318964	7.46592992673384	25.9287924623407	23.8366261361127	21.6317140223307
ARP9	26.2350695585226	28.6169356638679	27.7518906539967	29.3995763080524	21.4202853019583	23.275377975793	53.4078607787884	40.9156629799559	29.1619406053407	32.8572692623773	34.319828527039	21.5370090466988	27.330929408143	28.8545958028689	57.0486541419959	58.6679776579851	31.7911255662221	26.6136889428709	55.631910430629	49.6235078189529	35.81201688303	35.1881358878279	28.1630707221614	26.2025960289762	66.8826225480483	62.8766854568614	48.7247655135548	71.4815363943717	37.3007976769511	30.323951563032	26.3459287627941	30.62932208765	46.8279903227496	57.0580376974826	50.6430095941053	55.2139939942968	38.9479330993966	44.6676275551364	45.5829135090461	42.3694931649875	37.9491179657066	65.2377434894535	44.3862406954428	46.4798208625267	36.9810026153451	31.2166112780028	57.9300548189529	51.8786753777276	56.213507624908
ARR1	15.0395094878153	15.0217781879366	18.3396894347274	21.898720710478	21.8828224659229	20.2926159456416	48.992762929079	30.15241084717	14.4355108208931	16.405801206945	83.9501634917786	91.3698138968482	26.9717718551646	23.9289747641071	30.1601549238043	37.8247231184658	18.05205191552	15.3041956339409	53.1346937038002	57.9481257407689	85.2392379445176	99.4133205196687	13.109882355255	23.0877397621387	40.5976372827955	25.5701674820623	31.634540080591	35.5995683486365	68.6767923624464	51.0093112382614	94.7512028664176	80.5735959364924	32.8315368215861	38.5285202640532	51.3467361513554	41.0626847013071	79.3599730232522	95.5082966257609	52.1613211556146	51.5548025930262	26.2423973620341	38.0573791666872	43.2704149252958	48.235322188221	18.1341902892649	22.880895239656	41.4411744010057	46.305261437279	32.2251273954234
ARR2	0	3.86558100820162	4.40477361672779	1.92423380433151	7.88362394023185	7.77736890659389	0	14.1689563871343	2.08024777645035	3.47672047612263	9.75620879082754	5.06420437993856	8.67590915292124	0	0	0	4.4852024078844	0	21.5691414388624	3.79576794083417	11.8110260919981	14.1842201092725	8.43400195833139	4.5369408482988	4.71804052061109	3.83835149560262	4.07030017545404	4.93281197875734	3.53453872715816	26.2527303921545	10.2406763769821	5.63650454207762	15.9839024534481	3.38548787836956	8.8087813987213	3.21597178339101	7.72726747519426	15.1245428460238	15.0335196691783	9.60692556543255	6.09948694141529	5.71281488155618	17.9871184810579	22.9514401127142	2.0416008684112	3.50775292617382	10.9242900178987	17.1099508831968	8.59971326493577
ARR3	1.12554219835015	1.44541979046657	0	1.07926319354972	2.94783800587286	3.78055523938487	1.73680372048569	0.8830067378841	1.55569109559118	1.30001776352349	6.68807832771831	6.6276312849571	0	1.3431170834339	0.846435749563134	0.849228573010329	1.67710182336532	0.665043993632265	3.52848838309627	2.12896484854201	6.07252054564417	4.64078865158164	0.630728148956492	1.13096587432612	1.76416985330143	1.43523674786113	2.28294890128753	1.84447328125309	3.9649026992064	11.4524424890487	3.82919166112449	1.58069296773307	1.79300508508611	0.632949874403612	2.47033437080396	1.2025171132729	4.33404534417429	2.1207570915543	3.51333314458717	1.19740826980322	1.71054264006254	2.13613523680995	4.48383064739756	3.67799804463979	1.14509156066363	0.655806460369002	2.72319639825453	3.99858671271585	6.43121447326852
ART10	9.81182418547898	7.0201728457696	7.69168439292848	7.52669938208573	5.50661262535259	5.43240707366084	20.7640283246716	17.1545155381278	10.4617870144647	6.55683368713773	61.3313706766133	56.5964945068052	7.75680125611459	9.28317342686898	14.5465850681275	13.9601130216173	8.77199904888961	9.69001702271774	31.638117578729	38.7088663478182	54.8615803050856	59.9403771570885	5.89104738540344	10.3520591704503	7.90918527694884	12.332790855178	21.6072018335537	15.1602398530595	33.0823364688825	40.3418592561321	51.5016374933842	56.2991867478702	14.737192042872	16.5530340969196	19.6890378327766	26.9557793854075	48.576420835311	48.0675160184362	21.0014517030654	12.9732923346857	19.5979625999585	15.9613046569048	23.4524212083198	21.9857986988273	7.41536546842461	4.41022042285502	19.3305197979235	17.3290591591799	16.2183324813366
ART5	4.87209319767638	5.39642798932995	4.54501455088282	5.13892550257364	5.98135621198735	4.53175500855818	3.94696633154786	1.1466709856646	8.83844923105958	5.48665451897078	11.053767076684	7.99187781941106	6.31914701480587	5.0144725807373	7.69424550748505	8.27108032414025	6.26140641613619	4.74992578946892	9.49144724809293	8.29399118605555	7.8857439442604	9.03975543661902	6.7572621638665	5.69109441272132	5.72735288441431	5.59139063136684	11.8584986954427	10.1797522302966	8.58135019025892	14.3410322711713	7.87324746327954	11.6318889585592	7.37324433744357	10.2743237634529	5.88125632901816	14.4446687179749	13.6014164883242	10.5570322052384	9.58104651677372	10.8846274667526	10.7363253060256	11.7893967136435	12.3731881616355	8.75644607051051	9.16990735478973	10.4324526177576	7.07265270245152	9.34659152148999	6.26365299804617
ARV1	5.97357707841448	10.5479961525066	6.55594161068537	7.15996497511828	4.4001670620736	6.55953974454989	12.6743924434285	5.8579738907261	7.74047100726722	5.17469180183204	12.9075135949433	5.02495695445223	4.30432766524318	5.3462272047584	7.86150676572869	4.5071151976161	6.67566249336253	4.85316597735127	9.36338024627829	12.2406497208193	8.05712880617965	13.1946621797263	4.60276282828675	8.62840806272609	11.7036998177106	10.4736761495165	15.1453352784802	26.9202123314635	16.6589584766621	13.0246145446475	7.62098126826021	4.19460373820065	12.6880326884183	11.7573785833185	10.9256654350207	12.764219444684	11.5010601110084	15.9452773854622	12.1201139030553	7.14936013581264	9.07836938055651	9.21138930741294	10.4111743965013	10.5734679556568	10.1288888146634	9.57154838406853	8.12969923721922	18.0384172268188	11.7329721280992
ARX1	62.4151159448385	67.2914161499391	41.6042922068101	53.3515150313602	33.7623900708102	30.7872887934924	20.0270242280148	19.1093356711492	51.4534539176	55.8569343821802	5.76497812408874	4.24089330033684	52.8742356100845	55.6772305000683	49.6857898807698	47.4149783964024	49.8958369015826	55.7733844222525	65.4866033542756	56.5650543978969	2.36237215170668	1.69839178390888	51.2596669429294	58.11096685179	63.0154765803604	61.062344015794	63.7901320884187	91.4464144775702	23.5220184877216	35.4882369913242	2.04382157850877	1.5610551089029	56.6693836023618	61.1078180473563	60.2008135933283	69.0240584179566	13.5803636235386	26.7205586100684	63.0360273529291	71.9616419119866	57.5026840080115	50.560038237971	69.9332863414585	63.3246483748213	132.606991188481	121.633147120802	54.9561779359645	65.6864205827358	51.9299849694789
ASA1	8.07027451635294	10.0399593200056	6.27374948708075	9.67307111428217	10.5682005132695	11.7289791182816	10.1181519187082	9.4969050682871	10.4573296531084	11.3603200555301	22.8872775310727	17.8203017003151	7.26892044052522	11.4360106102066	18.2071209228739	12.1781583418164	10.8976862709307	11.3250480469513	13.1016314815754	23.5334728365454	19.2964392350583	23.7678768958583	5.37035206725586	9.37623567625369	25.2986083682261	25.0838556941891	14.32289161724	25.6236334876655	30.2056677925906	27.1274872160286	18.3038365976706	14.6394350212689	15.5344583815459	18.7206524441982	19.1886916393032	21.016579484069	31.0756273753469	21.5419641498959	19.5230464477765	20.3907317819388	11.2427367271175	16.2735996070795	16.0748042752674	17.0317028857506	12.3156673087643	12.6372193311438	18.9155106113827	17.2021890414227	17.2922035194518
ASC1	1131.44692805752	1161.75580020986	1026.99275661595	1086.36771048327	675.122339255996	690.330029579526	2141.55103920673	2198.82779730698	1097.98929798206	1054.8872655029	56.1053995628632	55.7132705440698	1062.0651680095	1106.92390410481	2528.85000562501	2286.20791709997	1072.0960310195	1017.02841782418	1174.31872533508	763.992242677719	77.5194999000599	58.5173427736812	1101.19969839791	1087.11315732512	2411.2262411092	2924.23555406872	1744.34338954294	1909.2371816367	251.867872444426	271.31271742705	100.712812033776	99.355790948222	1639.35419802282	1748.82719386588	1460.24390206532	1374.19620378887	126.549702948284	128.574803176634	1675.51126741728	1613.36778729353	1932.26289324827	1571.22347428458	1319.22298333319	1374.80356093092	1067.89252780657	966.505345801372	1719.87701678811	1720.8330669714	1752.40957350114
ASE1	5.40946803463179	4.31697587164401	2.7139974636263	4.74243541011899	4.4021012703768	4.79200065543226	5.72383425969392	7.27515280100618	5.28717807640884	5.75709935346126	11.7720617140469	12.8711975811448	3.60829211774731	5.53299383654686	6.27644001878559	5.94732253914569	7.25429414995586	6.98612404764444	11.4208942796397	12.5707652609978	8.64182817095969	10.1051145546453	5.19657571507121	5.35788913405278	3.63376057407308	10.6424294125835	10.3450762891947	15.5766256711015	16.6056834128602	14.4906206676942	5.5210315873246	8.24815017334071	11.8181030190517	10.169036120604	11.533490893217	12.3844341220612	13.3906213485086	15.7256848818262	11.8680579251044	10.8520327537896	10.5698968164055	10.9997920924776	12.0062711542058	10.3535482701326	9.11998229238389	7.69958220151214	13.1814492363162	13.1777733697265	8.61036804380414
ASF1	31.0148890118589	35.0420776863506	26.1833422266879	34.8868376639716	36.9044330455041	27.2764195126408	22.0884653231814	22.4599867123259	30.2959376311491	39.7835020304805	44.4622130835288	48.1652639118428	33.0064047569537	37.89972881304	28.2577288324909	29.701079700653	25.9949168483053	33.3032203918525	100.167075598834	69.9460416343038	21.940168201749	24.2407378171434	37.0995744252237	35.5093670666149	25.241012577218	34.2246249285731	62.9076451253317	71.8392663289292	51.4756600283882	84.5297271482968	17.2476314177305	8.37627522790339	67.4593539210314	63.3919118880127	65.4527824985197	81.2464516167437	50.5265423705647	47.2001625748916	55.8527624743067	67.5762700481241	60.7313967066416	59.4278611250641	71.2811807885884	69.1901620807249	16.9903190064958	12.5107139096635	61.6907421777096	76.2801607158491	66.455162520172
ASF2	9.66183615160783	7.97637506641703	6.6652202606763	8.47045180202522	12.2005154934678	13.908330085022	28.7530880829499	17.5420228305419	7.44024972436033	9.32619782408267	37.5784757959776	42.4952221144073	10.9799752918942	9.88246096451958	21.1749839294503	28.1182599326907	13.2653461926886	12.4778821925229	28.1874333418965	30.2849118102158	47.1177914989805	46.3412977066867	6.9611939018884	6.86521554532874	16.2256061000137	22.1765198527368	26.8761084092291	32.5712809770061	38.897571438947	47.5498554848545	44.1402286816932	41.482132881491	31.6624052023084	25.1486264270483	23.02338010889	28.7557590344418	42.5189919771643	46.2925046033011	27.4016134701214	17.6206692872734	26.4304381146725	20.4325477296599	21.4443587993387	21.6497196541834	7.30202139926084	6.51419499670655	18.5341075671968	21.1831015127227	26.0258553961055
ASG1	12.2621142167635	11.402999737121	6.80612752806298	7.29801722245927	9.96671400687526	11.034131638951	13.7017188931983	8.29295985615287	8.32803982754875	10.8663673266199	18.272772805263	14.9387474373535	9.74961781191772	10.343637297027	10.4932993835313	12.4421534812859	10.5530898986902	14.9901478123481	18.3682447343209	24.5267773711985	16.7983132084179	19.426496755968	10.5440603881633	9.87820909108781	7.9529208563453	5.66133056756283	19.439660004606	20.4409249762767	17.6256699234062	22.7409552173274	20.8583758670918	20.1897744662944	19.3092115531924	20.9246036129964	15.4671303201314	23.0391287239102	21.7089013664666	27.3534740488136	17.949954954267	19.1177482500493	12.8519361373176	20.4632420417991	21.8976611782817	20.0347604744311	21.0786043906463	19.2165808133918	18.9259125125878	24.9355795317454	12.3820089880336
ASG7	6.23378508780154	9.43493730752175	7.81886519574312	11.9549208105968	13.9941539013327	12.4249849180611	4.12252661818132	8.38372991903321	10.1547274194149	10.800153218739	20.2045515105253	29.2156103262509	7.70025822762304	6.37610519761072	18.0820619472628	10.078758890517	6.96641475690231	11.0499455468706	20.3400215322459	25.2668721327335	17.0346165786399	14.1627657761546	5.23988117284097	8.72458987003925	4.18747847675902	5.11005365067077	7.22517504269766	19.7013996388369	10.9797134960478	13.5919615700748	19.6929771070024	16.2585605160774	14.1864467393571	15.0238986253706	13.681833652822	7.13578630460394	15.4310836579691	23.4914941714692	11.6751051080672	5.68438777881717	12.1805495458107	11.4083674918409	2.66073421691708	2.91006484331786	4.53004117214219	4.66992947762014	11.3117741735584	13.2875834088968	9.54080163432343
ASH1	32.275074846145	32.0204998625364	26.8989841174822	27.6902017719637	35.2736863423084	38.7481356592044	32.0162245169198	35.4103827166405	32.9540200151301	34.4750836970459	48.3712785569843	17.1471211227776	33.1530900486841	36.7042036935191	34.4911926325008	40.6472440427879	36.0681485241299	34.6274197997232	70.0973746538292	84.4576915422049	11.426152078489	10.2915261233789	29.3729829630216	31.6381899389373	44.5019070681569	42.2385027921006	67.9247865038504	74.5633354338987	69.6696178289038	76.1918173234689	7.84302155933356	9.20160414245787	58.7595229381694	84.7451984866221	78.2938154083416	95.668887806987	57.4673920738299	58.5266753947369	78.172054927476	91.0027031002563	53.84407011225	66.3196524062214	81.2046046518622	74.5407303131053	21.4789163007686	19.0881125459615	68.2535416918633	78.1067264632086	63.4361409794982
ASI2	3.98697618936761	6.03435028139174	8.12622250439647	8.73835392369334	12.866066115418	15.0104430342131	29.0032815789202	32.1721371174206	15.3511248257157	13.3215954786056	89.5332572010713	94.8653073403868	11.8197347488158	11.2145147649582	19.2747430696	45.1229000281442	16.5491852445616	15.1441455664054	31.3746192734526	45.2481366067537	116.491626112966	106.684917401513	8.61762766158198	10.7308242525829	22.7647363959583	21.788436120302	16.1736035322611	25.2010391335692	75.2397875054798	65.8188944700459	85.2595684269577	80.7886344821174	28.1271738773497	28.8266599811294	40.0026188653984	31.034409891806	94.3068407911517	88.0009065351047	34.1352426520626	27.2669688320921	28.5647545705725	25.9430949645556	40.8416728339076	31.6404330722344	2.31783684630997	6.96910908120348	31.0058804259115	21.8530507988261	28.0694118280238
ASI3	7.88886206393044	5.19872354855333	8.20227333723568	10.7495253105505	9.78691104852804	9.33316701763838	13.9350573456048	9.77200691874443	8.6082168270893	8.63216333440191	37.6804832760219	20.4321318910984	8.61634938918467	11.7053562334036	17.3294318108219	20.206162951757	9.74403625876795	10.4877821108995	17.5720020708647	21.5973331768726	29.630414695292	29.3476728638529	7.15458973890411	9.23064116851677	17.0831271074637	16.6775533351017	19.7907316947638	15.8195272531118	34.0058735575629	31.2327027317884	21.8946139349881	16.6184881420958	20.1734777570785	17.1614980865766	18.6813420675714	19.2964903467733	33.5746557237931	35.9871070014951	19.829413438459	19.5458182490781	11.6735755495425	17.4345267017646	14.8864312810547	20.3517367031218	6.12501020437749	5.08036056577422	13.5616253895908	19.913092395793	16.903454865929
ASK1	14.0492823662374	16.2378522488085	9.2513705882563	13.4716026760368	18.213838418358	17.4238616056808	40.3232673710364	27.775228702881	20.3893828030268	16.5516359449759	17.3035410525296	22.6909611730863	17.0072462526267	14.0826816714344	19.0177052187444	25.4406735910992	21.9806578796127	17.9306073012011	30.2011806719729	21.2593914889243	16.537835422247	9.93038848723524	18.8949105864233	13.9758071926479	29.0673615262751	26.8723476469832	26.2165402171447	35.9160854295764	21.7759513677423	42.8856587394784	15.2949579542005	10.2598831659505	34.0186739867781	36.9749044462973	19.7345597914559	36.9247470948335	35.7049924465315	20.1185425677466	30.5225137443172	33.1807669866716	18.7892139029341	20.7976788718417	31.9018173826221	29.3821480036703	16.0084763238268	15.7169982334851	18.355461581885	16.7701709846765	30.1033689072825
ASK10	11.4826010282211	11.7365439825354	5.52945526732548	8.31402623913318	12.773511634315	18.5273934974219	11.3904999058752	14.0639816920709	10.9314710853348	9.23641646126549	22.2160978797667	23.0636046213401	10.3339511259374	12.3739583321355	18.5039481966215	21.2172017778351	9.68957018841554	9.96927135136807	20.3073910899883	21.2760913790472	22.2402153644092	22.1539174961161	9.65186233503835	8.38854413448808	20.1096977681172	23.307703214099	35.4106441027878	35.4259067258604	23.9393500857808	25.5472813406432	21.5254475551711	23.0370644249327	34.3440561073064	33.6040383131735	29.8308896914316	35.3013450218209	26.3937633881779	29.8041237024224	30.2831817460224	27.4854239133144	27.0663355888153	32.1883643411341	33.9573416930618	35.0335559245572	3.45693081707303	2.45770394962372	31.0416736346736	34.4657943657579	29.6249090260237
ASM4	15.3583451437534	14.5281983034403	12.3407135612722	13.4119398766375	16.4308381561606	16.7939669455266	41.2619316738399	16.7823623857035	13.3621449837204	16.392818048537	45.3340010178961	52.6002731963727	16.3627719689976	18.1635512785713	32.1745286019498	32.9015515810458	19.3087994757506	20.9041937039229	23.9507446170684	26.9753140285535	49.2324037094285	44.5858139020254	17.5202791714364	16.5346651172102	27.0816290888396	31.4745320120133	33.9327989554633	35.7300658636065	38.1613285341063	36.4767288011032	41.9868832399789	47.374737853892	36.6990960266246	25.4476521944029	34.3103407916418	32.9637535346189	40.6582118712698	47.5414747532257	38.0098872449385	29.3225508798798	23.7575965713735	22.2514874201348	28.6795311422815	29.1265143578856	24.5536874743243	21.3329703878774	27.3714028017764	32.1524477093886	27.6194484543989
ASN1	114.413765356989	107.5450595952	91.4971034821393	105.868407060971	112.370445169251	134.288433351677	227.737498341079	170.288086486934	119.383087278537	118.41402523062	226.393614311793	214.180869627579	127.505497924907	124.580623014341	166.623899066886	177.94123190265	146.326548408069	138.682477134431	182.646655322923	178.055953940238	312.018753862738	327.376429806343	145.415766325837	125.468042706606	197.774934735526	197.293049025487	197.535518566095	210.469963530064	190.055248707084	215.62041960044	502.951034799115	497.161134615701	227.329901518092	250.041813073482	214.299421185452	232.306094229168	281.981138216881	274.07347767968	241.947299394612	268.074972709909	195.567539683032	234.485655935616	229.640818177541	245.433216669825	93.2226487282135	87.5240369796667	240.323391718653	237.47515658961	230.670434077161
ASN2	121.423903911751	112.849977374385	108.532578882554	128.674284988712	89.7488335453573	96.4469730239095	398.106431556863	359.431385312032	144.816625064893	152.02968028957	56.8012615533859	77.0797095516387	139.411915378194	141.609446876822	369.396534356744	405.751270767262	154.999655554345	136.463295525745	173.228731346559	137.804288887191	56.3623107355927	62.3783189702679	138.26059566006	138.297908348789	435.575026140672	435.289287557501	231.558275635714	250.471856972521	87.75172879027	90.6148476726277	72.3980459548451	74.8907907516444	251.658225781044	242.017022661923	187.374255724952	199.004943762711	74.2306690363986	78.7785587761015	242.416048601859	226.92482552087	226.767021328718	222.012746736097	159.327129995608	191.028752787971	139.579284386538	130.192136885966	255.315465224732	261.489491877669	232.815964784193
ASP1	71.702228865017	55.5336030449465	54.8027987482956	50.0163039735701	37.4475796474019	39.340037408632	100.16190449697	98.344908788095	75.9395947746795	70.854458041459	13.1704062183719	1.01605271358987	61.3736795894071	70.3662203620815	137.575799329559	146.130192945119	71.9500047249771	69.510381724083	68.3544899306763	60.3376889854022	8.74161719229362	11.430213307912	64.3622084949771	69.2388082312267	137.546193281323	171.729368301803	80.5221276439938	88.8808108642725	25.2714114498342	39.3926734076232	10.2742051114917	10.9927604737664	80.5526449648204	78.9585320348332	85.4135401119488	62.9785210694186	23.1075177919246	29.1000707716764	87.0408339943189	68.5389258802235	67.1644438462673	76.6350400413604	60.7836210205738	82.9032549614736	88.3716643430293	104.526453954686	76.5702617784414	91.3299933758332	71.6775119173988
ASP3-1	0	0	0	0	0	0	0	0	0	0	0	0	0	0	0	0	0	0	0	0	0	0	0	0	0	0	0	0	0	0	0	0	0	0	0	0	0	0	0	0	0	0	0	0	0	0	0	0	0
ASP3-2	0	0	0	0	0	0	0	0	0	0	0	0	0	0	0	0	0	0	0	0	0	0	0	0	0	0	0	0	0	0	0	0	0	0	0	0	0	0	0	0	0	0	0	0	0	0	0	0	0
ASP3-3	0	0	0	0	0	0	0	0	0	0	0	0	0	0	0	0	0	0	0	0	0	0	0	0	0	0	0	0	0	0	0	0	0	0	0	0	0	0	0	0	0	0	0	0	0	0	0	0	0
ASP3-4	0	0	0	0	0	0	0	0	0	0	0	0	0	0	0	0	0	0	0	0	0	0	0	0	0	0	0	0	0	0	0	0	0	0	0	0	0	0	0	0	0	0	0	0	0	0	0	0	0
ASR1	4.57715293620624	6.06164943975318	3.76753693619127	5.48617611887432	10.1146809420699	8.8696361319687	25.1616708141971	28.2780152067686	3.5586078053304	7.93000025858744	69.5399196662395	85.1877482034373	4.94716903713417	8.70497662117045	15.4895579701418	20.7209910085764	2.55755073745367	5.57798168327124	26.1357269285332	30.3019198163926	94.2882597304124	109.189571679921	6.73294245252141	9.91704741737421	17.4871302367374	16.4153029606765	27.8515983870095	32.3470641320735	75.5803783757968	92.3139009646913	115.8157554293	116.508981664207	16.4058306317424	14.4785739901839	35.1606864614618	25.6733778682333	77.1087821969659	79.7747523609658	21.4310925745726	21.9122703379697	17.3903238460962	19.5454034054741	17.0944107563533	27.109565485899	6.98497699940873	6.5006022885025	16.6113027936685	23.1715105389422	20.8408479833089
AST1	14.6692543001864	16.4834437529585	13.416130974943	14.0660854340107	14.4072642017656	20.3044018562099	28.2948156108181	20.5505310838196	10.8618144320894	12.1022793342909	16.4143983484005	11.4583153659235	14.1940991219388	16.8797213072619	33.0948752531892	32.4135984796568	14.0514168687209	13.9299696156293	27.6860022338097	15.8554056422919	7.70879463877236	10.49203448736	10.8625403431396	12.1077990039476	48.448443152532	42.7553950123272	24.7947853428977	22.3220522718161	19.6855979972979	22.0845058269939	5.34708251097324	5.39557156369632	22.2555493260225	25.3370475532828	17.6311177231039	25.7475880912933	8.74186898728404	15.1361639849436	25.5112487176527	28.4249760054435	18.5779669242783	25.3546036740382	29.2189833498025	17.1198012760942	21.3200523217643	23.5047122181541	20.2808801664854	20.1010375948909	17.9609919270054
AST2	3.48304996760235	6.03846281633898	3.05809194445139	3.00585423369506	6.15752599527856	9.71926418129389	13.7053207929188	4.09877945948274	3.97170276680714	4.82756165996203	31.6093991517977	22.853498480425	5.42107323530396	4.98762721523759	9.42963796883221	12.6143633912223	7.39559791376846	5.55663777583592	21.0582504961395	31.623367948479	25.1125811346272	28.3120530375549	6.44102669907948	6.56221472895679	9.00786417123888	8.66074911441126	12.7164661962986	15.4111238385682	32.5144797194571	39.4906727299791	20.1444139935863	12.7180082392348	12.2068518382577	9.40178219299463	16.8181045777095	15.0710885103229	40.9064491313687	38.7205600935583	6.52332548355474	14.4512266490824	8.99871811186226	6.44512345339563	20.8131626185267	19.3490168421206	6.37838242778401	5.17504334728944	12.6406570598187	11.8788758530566	9.70208081068472
ATE1	5.50969045357796	7.54100142807586	6.68332231346951	8.61983594316074	7.6897064888613	10.5642879068344	18.7936506429516	19.7922254160391	9.31873683857237	10.2992290982488	30.5459374269503	31.4672854564872	10.7818394421776	9.86208956176096	15.7013433194476	23.6297920505185	8.74972689831592	9.76641651604444	13.2465226196733	18.1005857040545	32.4280932673865	39.45631161731	8.04372472306484	8.74140762465132	11.5901734201283	14.9757303269522	18.8215986145989	17.1074732753485	15.8334105515756	20.2326771685748	37.9820510529113	37.8739756790518	18.0159645536212	18.1010006040124	16.54779676848	14.8710568391119	18.4241880989794	28.9586018782358	14.1206429815515	20.8236286186609	11.0175191315865	14.0339117302049	15.5952977447747	17.0566789277268	9.73564033882671	8.11013596753809	9.997827350567	17.9253089057883	16.7763513953719
ATF1	8.83369287308422	8.24227694254577	12.4215619933793	15.6173939326046	5.96468019985978	7.06115041497971	24.2803598377124	22.7396455401598	13.735843515321	17.9349914733502	52.3414071092313	41.1019196829272	18.3795286714699	17.2942851080335	41.7271768918964	42.4898550465769	21.2862821213678	22.5091093519121	27.0747651970984	26.1076592206923	37.3692573293359	33.6584481193242	16.4748484528006	18.7233355769587	38.2924343141134	39.0728671583931	12.8781664406851	15.607077062225	35.0078142950523	42.1328035117055	28.1745959515258	28.3008687498829	11.4336285134159	13.9714652800711	21.2057775354211	17.6958705068482	38.2671127663448	47.3327644721621	19.6464304929273	15.8586023585461	8.81016166531238	13.3597387102461	25.5683033959245	28.4152607539604	5.89779040970587	6.27293669387184	12.5230355615767	26.4788911076355	13.6044438296152
ATF2	10.5359928756772	11.1885171629707	10.3771850053478	14.5065402458196	4.24524743216751	4.60684313166316	11.8807738716776	12.0805880792827	15.402647493319	18.7218555456482	0.875605983714812	0	16.3515906750619	12.8144467570391	15.8466156860931	22.625409405208	22.9447280569055	17.478818181077	11.9777073310077	11.7529020074513	0.795016783535703	0	20.2102610546461	21.5806945842175	18.4194865916877	29.4535409826179	18.0824890733597	22.5783169885719	4.75828849907059	4.123241813876	0.919082664373265	1.13819752520544	11.1892980639617	13.6728825959058	14.8232713512188	16.4518262078481	3.64091308260231	1.01805207390776	16.19085099626	15.5197475056471	9.85355109206876	11.9206739255617	15.3360238587671	16.3317211297482	5.77176253919052	6.3750046832741	11.7652437230164	20.1546062416534	11.5771208579539
ATG1	1.52321784483756	3.22758302531259	1.67171680156548	4.23570542435803	1.64561658297525	2.12522554796084	5.28851235373	4.3019508589348	3.31591693794182	2.90289309874566	11.1081453552709	16.1447240532328	3.95125893569509	3.68077870973765	3.43648589385362	3.10305141811964	3.74491995630277	2.9700485769688	8.39063383277553	12.6771269228138	9.63755443402225	8.34406622554413	2.944823939878	3.78812891802969	5.01372340245914	4.95295704363641	7.10599656723476	5.99076426108524	13.4144147066264	16.2737966843003	4.40479495974608	7.05930134151844	4.61037078882862	6.16738568216412	7.68925749681028	8.2996957783738	14.3701125449591	15.7853355833339	5.13503464695632	6.07677171939403	4.62981555116096	5.63720718276556	7.73676102361791	9.45725838372827	0.774835955859906	0.931893011029794	6.357215271875	5.84427112147827	4.24293397894754
ATG10	6.32359029965527	2.43621776522233	5.55204396387848	0	4.96851064781309	4.90154881189433	2.92733778797564	26.7891973278199	5.24415484940429	1.09557253255759	8.1982646816192	15.9580885505204	7.65495184600744	3.39569416378786	0	5.72541648257553	2.82671204651443	4.48365323465597	8.49594933356653	19.1377043415761	7.4436798162941	8.93934668450512	2.12615010420072	5.71865528148357	38.6549547605778	14.5142925749646	5.13045975592765	9.32646286077594	11.1378757663867	13.7877610291719	0	5.32841567450575	8.05884423409704	12.8018364312112	8.32735562231683	8.10723782540104	0	11.9149589293134	11.8432709517482	4.0363969220469	5.76616114952825	9.00098897975828	7.5573950784035	10.3319537825332	3.8600529107283	4.42138410919589	9.17975782810043	10.783220739284	5.41981461502781
ATG11	2.27588821112324	2.41121960800927	2.12309981712963	2.83701153996357	4.47047814768983	3.70459837594315	3.95086377175825	4.01731630445178	3.06702452431835	2.66153900636636	13.462030627295	14.6456782384069	3.54222838352834	4.17559087533096	4.87784635669985	6.18184030664407	3.56073045574721	2.72309956794215	12.5367356601069	13.3449992813081	11.5532687004608	9.65197678109676	2.96520919195011	5.23119350775284	4.81573297326746	7.18269488399333	5.53942194983231	9.23073314771004	19.4416413178538	13.3981539671231	7.16203794857714	7.35132468433595	5.61954690852704	5.95127185660056	8.74145860127009	9.11820705345723	15.3362791434439	16.7241623899464	6.81994293138375	4.53974931885242	6.05284008305697	6.1550753209081	9.17981481660027	8.552603599655	3.35735917891776	2.8841813034194	6.40116997235182	8.97468180829786	3.90123220513554
ATG12	19.1289297753668	5.11778482394748	10.4969028759679	11.2092367703889	13.5686019366793	16.4747338297884	44.2762599578858	20.0093181761075	15.4229963169022	10.1264966429073	48.2218989831829	29.500521281972	9.18903090927631	11.4133373540289	9.59025248137537	57.7316081680375	14.2514219655615	10.360712766086	29.9838439648261	34.1722888162038	48.4747119768094	50.7031429309056	8.93283330145863	11.2123238791937	37.4782081019451	26.4249076367587	23.7106939125777	28.7351152424236	46.7949067637918	50.9766447974761	50.6163788165558	49.2513108882423	23.7009618886913	17.9286412433887	23.3244688951421	30.6556629015223	45.0134899623023	34.0405326453118	29.8550831750796	25.4378685169718	17.7657021324028	31.7661994941741	34.9268364146672	27.7816049241561	9.73057694507358	9.28803982215914	19.2840046294578	29.4480840518099	11.385435355105
ATG13	5.84096751324729	6.35162099894738	5.37646515733818	5.60078219843107	8.69748129072718	12.5600450824119	4.79726864569518	5.32144112194132	8.00807880149241	6.20233701408404	21.6794498325772	21.397063797523	6.02804590189635	5.73342772301095	5.52608616511881	12.3681847957625	7.58026128986814	6.01178929233678	15.9482633662303	17.4632784581098	14.4165458795164	21.3086044056597	6.33511316791208	8.37768852699601	12.8466530275375	11.8929106009579	16.0511130597212	25.4733869151514	19.5800948940695	24.238432667472	12.8202871329545	9.52600799945419	18.6095064217574	23.8403679253474	16.5415840942186	20.8349324030976	21.0403396635431	23.7862546199105	22.2316567318144	18.0403329959374	19.7580152375819	20.3828072033216	13.5108016532958	17.5475382420046	4.02549930161176	3.45816653036085	17.4370003770188	14.4584166023085	17.3601026055422
ATG14	1.82583771087276	0.439637554942911	0.500960429109831	0.437691243055051	0.448307663961065	1.76905938470691	11.6218526956153	17.1888365569284	4.25860733659357	2.37247462926333	21.4520380717727	25.3421391985034	3.1574977721426	2.45113149059599	8.23841366747042	8.26562525869908	1.53031887357382	0.809115368820674	12.2653940742145	22.4482264714002	34.2537253751611	33.8769484456607	1.15105114579032	3.43993390155474	8.58539708515383	9.60386525543061	7.40669385023819	6.73218172379878	20.0993573945473	22.8907427994647	30.2818018511239	24.3596762128619	5.09002891477988	4.62042718932696	10.0183325985662	9.50965834530185	25.4860251517721	23.2217225304162	3.41956677848887	9.46927933997518	3.46851974373005	6.49727754957736	12.2742012430848	10.441172056353	1.39316241081063	0	10.7677280689916	2.91889983250051	3.91221868938377
ATG15	4.46559995314769	4.30103033737004	5.81986550078714	7.22583633993729	8.77168693089985	9.73513317144489	12.2742121488403	5.25501599225323	4.91846293017554	6.04430939685254	45.2300652301005	44.3729359263304	6.75723786061732	4.49618151026965	9.44502564038538	14.5301923834556	8.73325972315771	5.44202391673119	31.4984353369181	27.9796491179372	57.0833389678085	67.5669288701439	5.86503770497465	8.20301449038137	7.87426537984953	6.93990478470211	17.549097286046	13.7211603245865	41.7848335383301	47.4661975267459	73.5880658154997	65.065874184478	16.0059685972541	15.5382628227076	17.1518381432625	21.4694145406669	57.4969060583237	46.8034988447079	21.9542078767141	14.6975580738371	15.6939721648529	13.5072288152429	30.8538279778352	20.9766716821648	7.09867550613522	4.63467185724249	16.7129213669796	16.6576313329323	22.1269602061462
ATG16	1.52387941154391	5.8708833248078	3.34488176735441	4.38365099545728	4.48997705842206	7.08715470905926	49.3806598220563	32.2787539664935	3.15938326645938	3.96023022979164	17.2868933289432	34.6107820827043	5.2706239436348	1.36383951883893	10.3139283009293	34.4933296674849	1.70297838979648	2.7012147532636	8.18958241057191	11.5297027379859	40.3606403647756	70.0128465016869	3.84275204442734	6.89049842391778	0	2.9147590341225	9.27268368725943	11.2375685161204	24.156453669482	39.8714492297831	54.4356519774119	70.6234481049364	7.28268231867583	17.9960452735555	10.0338078053629	7.32641190639003	26.4054890343876	37.3269638621628	11.4161087775766	7.29530418337205	9.26364413857867	6.50729911131852	22.765048037444	22.4084929959302	6.20139149914342	3.99554468033398	11.0608483106422	9.74466002184853	6.53042453688247
ATG17	4.33494052864473	1.04379416896853	3.96461609500621	5.54225511221832	2.83834613314187	5.3201658221549	9.19758947091025	8.50208816927474	1.87237693004222	2.81638292736215	28.6856346623366	27.3489415205407	2.81120977777827	4.84960232959759	6.51995674996285	7.35913351249805	2.82590645808943	3.84202029127502	9.22154259910725	18.4489417146255	23.919317124872	35.1088723285853	3.0364783569017	3.26686289506199	8.49317525312297	4.83671725985964	9.52530359333923	11.5437380369698	31.8134661053617	27.5676210289669	20.2782286743008	29.4248567674796	6.33015153956594	8.53212066326654	7.13570822011621	10.4205811985661	22.9517532417069	21.1004280451547	12.1781705028718	5.18817259370203	6.58798971939882	9.25551566041982	10.7931661517888	13.5752797085143	2.20511051118409	4.42013279490274	8.52161086877646	7.70012333707843	8.51442477559794
ATG18	7.29982084203553	7.03079479186033	5.76824688644183	8.39958329918545	8.02976121892342	9.27950782283948	17.5721448556855	20.6165867288555	9.68598465466974	8.85293347585303	41.167892121191	46.4227259145944	9.08920188148921	8.88512542437913	13.1751246967095	13.8795382017982	13.7050138459684	11.6456159936922	21.1843417097073	20.4352426678777	31.7934993919394	33.5380689072763	9.57209051313441	10.7824305731735	8.92450699751795	11.728498101016	17.175268970811	18.6614994141983	28.2862257539961	24.8294163858252	39.7353036104401	31.9854120343064	17.2104701613248	15.7634044682524	17.9441800270234	23.8649694037403	39.3524012706421	39.6125664734243	18.0465690681931	17.7062507466003	14.6439255985117	17.0405376592811	21.8102158635596	19.08317920769	9.20897143759511	7.14554439653801	12.1864407071972	16.8046892103504	15.6412656371546
ATG19	15.2594557323499	16.096840237642	16.3483747830431	15.3287713547999	29.9739555915478	41.397793686241	33.6380029551773	28.2181176392686	13.55860110909	17.9396202515652	216.67365770669	238.38637727762	16.9642923709728	14.6323930410722	22.1312503228655	19.7372275097041	17.8649303100352	17.0665006705936	86.4000225846883	117.514846736032	222.391643028462	227.914265127703	17.7128828354442	18.6186323989976	33.3137777367919	25.7124859854235	64.112250513807	48.2264889758806	139.50429597109	156.057945283233	150.797735386911	146.949658568329	71.7678619997515	66.8108525471717	66.1853132728001	73.9457537053398	158.088360102935	148.551742502513	68.045199257399	64.9350678496316	59.6329686751489	63.0922897742915	82.4995019385545	72.4216229036294	9.24076955036475	9.5261330358994	63.9498217471188	51.1127915830378	55.2726705474748
ATG2	1.40931975591697	1.67676880395575	1.18278146617619	1.7488342598031	2.11693609815435	3.02014682264219	4.22146803281146	4.68268426605929	1.80468871401686	1.93897825972259	15.7186006348029	15.6906236841584	1.72037768670753	2.44843256746215	2.80546388833824	4.12826840969763	2.4087567783218	2.93899757738481	8.13078774213714	10.506141206837	15.4917200313114	16.7000652646092	1.18462607844535	1.18703536825602	3.11853291981679	2.21993942112277	5.38076660598435	5.09451182206883	13.1414492930198	13.5566393210956	13.6787728650626	16.4159228299756	3.16951037011201	6.01391274248277	5.09463010557773	7.30705006218427	14.5246112583701	15.1516812282412	5.90001572689121	2.91041500327889	2.77175632365091	4.0120614100444	9.90758360087632	5.282563394097	0.337363798983407	0.289819111638784	4.81381317691632	3.71086848734956	3.3750117750154
ATG20	7.28130684838784	4.88783609076242	6.05390394285104	6.98191038554046	9.96841297362807	10.0905927592249	37.7926095699719	31.6773561143297	8.23415838432325	6.68976993953287	72.2292662100664	91.3183542088105	10.4932292115805	8.49133585071454	24.3917812202063	34.4610496930853	7.6439086988879	8.40897324138746	24.3085419068506	32.5533854456553	115.254464826168	111.509978371322	5.74945966310985	8.14780838285045	25.9378432867958	21.9457278178139	21.929320258942	22.7795918145609	50.1331900102511	49.5521356774595	136.243762465373	142.230784868742	21.7924808796154	26.0568361942423	26.1506708955269	30.4097613722718	77.3159796953308	58.6196445060957	23.1415039004754	23.5907082361	16.4309456456495	20.1003145938222	23.7325995298333	22.7119430071136	2.46925510480039	4.04967015740642	18.8178927693044	21.1642785593486	17.0199538160086
ATG21	8.54675065686989	6.52866184388479	6.14550255109547	7.91271567515345	7.81519478701874	9.36606331838935	35.4720164077352	37.4558908048417	10.6928222971886	11.7438030409426	52.536744684439	55.0367011578079	8.91912997249235	11.0781011767115	31.9151234170091	44.6953029719115	10.5392882734676	9.14218031913474	28.1132514740852	39.0217890121874	63.312857197389	70.3052931750236	9.16591700617431	8.88404918216371	25.6373754485009	25.3668832044718	16.7376580021906	17.386620882133	45.6799489834396	44.33858500717	48.6283250316851	55.8755957380426	20.1879035653778	16.4075920400437	28.4609385379277	22.6706429002718	51.0677209169371	54.4198455095145	23.7344633853184	24.4555256951793	17.4678185766151	21.8138967137408	22.0135483024386	24.0764298609194	6.29650735079593	5.92428618199538	17.113207862584	27.0125872327591	18.3131022135704
ATG22	4.66234199231048	5.81128941348641	4.81590122065708	8.41533185537207	9.69689194857923	14.4555785811415	5.07840153670063	7.74571203245549	7.39182782987452	6.88973880327374	39.1116732890441	40.1423220124577	7.82566031381747	8.34542711711428	9.28108775499198	13.0364553355418	7.04925412545898	8.26444867364392	37.584282243628	39.9441652312263	40.3544576496991	36.8317727512491	8.99066193104142	9.30075264384768	13.5407900564134	17.8355616371249	27.2574688468488	26.9660963693505	53.1360559186007	60.3959333236654	14.9286440189612	21.1838412837037	26.2136171209092	31.9251961090518	36.1161392840139	48.3468914520309	50.6907680404906	69.2451944090119	30.8188006991681	38.5132294869257	24.5911923386792	24.2033308587268	32.7766238442456	53.7720538878728	11.9978380828804	8.62906336558081	27.8690937671267	37.4137759455561	20.5676433704388
ATG23	5.89589236106877	6.62504149724961	5.39223504382061	5.65345405221546	2.89530072628601	7.8706137027366	9.09784455557323	8.47996014399545	4.75365130188849	7.09357439027962	28.664101892447	34.7172157789384	6.23091442800652	8.20820788017095	7.38972439796089	9.6383999839403	6.95486404051436	5.51582120764454	12.7621551373543	14.2498745084839	33.7372831848251	37.6221207058501	4.12988835405444	5.18377756414757	6.9308894220278	9.39765462067704	10.6299080378133	15.2978919667206	36.9230066464766	31.423920921751	25.0728877520627	24.3802819946121	6.26149537784527	9.94666374499213	12.9402662614341	11.023424738979	29.6399019445547	41.9676943955646	11.6557161866864	9.93119143698874	5.9735169832155	12.122102069668	12.7223805631855	14.4497378052577	6.33152071859881	8.58823616981991	6.53804832359394	9.07647361053241	17.5460083934388
ATG26	3.2416768610862	3.33753656703088	5.15255498039538	4.93053475187994	5.92842686314986	5.45861407381897	13.7128478397706	10.2603014134974	6.25730478005513	6.00361001766914	32.0636441810813	27.645022993909	5.99259234364981	5.00212889177763	10.3396958219325	10.8799028132899	7.74502189311473	7.92575302469769	20.875520019497	23.2579554611229	35.3627189784243	35.3572356027488	7.42284592517427	6.06533163784304	12.3520442746541	11.5456495509472	11.7898548850573	15.1125228188135	32.4860252923167	33.8779540881426	26.2401380989831	31.3969747704777	11.2184168251584	10.9377854539772	13.4936461015574	18.0931242441172	37.87790125977	32.2249480052773	11.7237977401714	10.5243501319561	10.8723747361319	10.5013374509017	14.3611116496503	14.7937071434475	3.86661000563861	5.8617695384865	13.184489792053	12.6282682384458	8.14351785084062
ATG27	42.7685595924071	56.7141276472868	46.9378455040299	46.9534116998402	51.1360240850293	45.1620455653065	74.6031935058895	62.7286410125016	53.972832075524	53.6935450518008	91.4075723353445	95.4163025366933	57.8828464109247	71.0064233442558	86.6999688144695	81.3740619759562	69.9606159563139	64.8237859394153	100.765200586271	93.7929917441155	80.258442678928	99.6711434853799	54.7058835853271	54.1852304532974	96.1805631424069	94.8451865579911	86.7476137625263	85.3224327714341	106.98926194461	108.117287622643	89.6208060575737	87.0482019842335	92.815650597606	75.2898032277265	76.1826357365913	95.3598312401694	116.950662573874	88.7599751466331	88.2262021423747	101.878273467067	99.8509992076567	90.8740527393465	98.1519188451342	81.0184833377601	71.2576466271445	56.3395673040958	86.605162571765	93.8054107787771	88.983486235954
ATG29	0.82487987857664	1.6654429331716	4.6423880471349	3.15473361341435	6.00106422631993	7.27523699196203	27.402283331358	21.9404502375404	2.6886056193559	4.42838598743031	84.554366587189	80.7741386184451	5.84568564015829	6.90009335529053	19.0017712393254	31.054836766558	4.68956123628661	5.26694539930284	23.3641749972563	41.7051101026356	104.932422006032	104.656957383449	3.54927835073637	5.31561976083884	4.42129485928611	18.0524534755235	8.58891654879011	16.962134402763	53.7203571096851	59.0945209134373	93.8729501938151	90.7687180740853	13.1025342468844	15.0680407881011	14.9575780729797	22.9729808460716	80.5358687937154	81.4238793001714	11.1702770840463	10.125186924956	9.64281980732443	9.0315258851685	24.8543138733623	17.664587483855	1.19546979681038	0.410774586195333	14.9250745937017	20.0483219520577	12.5890233001035
ATG3	6.17382443370789	7.93542632887486	4.4620116413267	10.4285222878942	4.08834131805814	6.85276856620861	19.1612291272491	21.5687897313189	4.80381738125287	8.0239305872437	89.7550125924719	68.0736365878645	11.0692042316185	6.93378673471193	22.4725561620198	35.208043333222	9.83350988494231	4.61171667926789	36.6101587655896	53.3938623476591	64.2748876632849	66.4985401777004	6.02862143112325	7.77070257751061	14.6802659693342	15.557246267862	16.163881218261	31.5524897749521	58.6244345145654	68.513211882783	53.8551544844097	56.8495058101079	17.3775423929984	15.7633490828537	28.5190552817006	46.2287545586186	69.2399408683872	75.092037944183	28.1577814039741	17.2526907058202	10.2834991704648	26.6578264516657	27.4137822938298	32.0662122961372	6.35225531601787	4.06642795470492	18.7974623684759	23.1775953003048	20.0256066247061
ATG32	3.01027662581494	3.95365990084471	3.00340819724048	4.46095520635407	3.2252923455815	5.30305163752125	5.06741112473294	3.86447282000877	4.53897813445396	5.45244671899139	18.6265530007033	18.6464807161891	3.54942426576418	4.40859598767466	2.46960291757975	3.7166411826602	5.19903668065977	5.82109756042834	20.2221328335208	17.5995273771567	17.717497458834	16.9253048483228	3.68048860662538	4.12470899695482	0.643402777255727	5.23442383009877	11.1014402668187	8.74498911260424	17.3523349717847	21.4806414389002	10.7067257866657	7.68655530801456	7.84705199669568	4.61682713841418	10.8114087074672	16.2269356388714	21.0754499791825	20.1098099200034	8.20057734732326	10.4808543585847	7.07025728917968	7.01157780186441	19.6233763667023	11.6253686689104	7.79562633928451	5.74026937417881	10.4283060312077	12.8331597822732	7.03652653312993
ATG33	10.7004465099184	10.3061134988918	9.60843635599089	13.9915574109032	22.9294905374531	27.8985244677755	40.5286680115082	27.4735650113185	11.0923790617508	11.7973726815043	345.240363179027	299.493501708084	12.6169001181952	18.2827585125106	35.1141201764713	19.8169515395003	19.5677428433913	18.9675411055759	141.150911074362	163.759369037979	304.876481406421	259.560952177888	15.5358329749038	13.9287568524038	22.8706715115625	20.4669907707246	63.1384165345651	88.4734126412805	327.253011569065	299.060601437179	127.413194567513	120.220018096595	71.2832616987347	55.7980198780128	134.506656914396	110.684394997981	318.390602157853	318.924356488998	56.4779450245127	69.8541035663312	41.3941877008428	44.3085250611454	107.537127101297	95.3627997021824	12.8656278212603	4.250935474009	65.3116706587366	66.352332316907	54.1931203111893
ATG34	2.19888234021128	1.41189884610518	1.20662509031547	1.40564444909605	3.23940683860483	5.68133013814617	15.2687299844235	7.76279043415528	0.759805692765886	1.26986861175948	133.629156088776	110.981603053765	0.950656305116744	2.62393738139789	9.09484229841202	13.2725745901422	1.22865562563065	2.59848038674924	47.2684586543396	73.4789003086423	121.869351686464	106.853089695694	0.924151671690288	3.03802331432888	3.44651058448011	2.80389887026373	8.17667975132388	25.2238037657683	136.19877842861	119.060545285711	68.5737685052562	66.9084202378269	9.92474239423025	18.5481269273785	37.0000333948457	41.6993045819275	117.833417189094	133.962175092083	18.5320081708332	21.0534728674742	10.5821797077521	10.954616361278	37.2286797496742	42.5136135316054	0.745691061416902	1.60149582487016	15.9602504643972	15.6233925020721	12.5640951382227
ATG36	3.35690795754943	4.8497888349315	1.22805658815617	1.60943682328783	10.4403336616582	12.1427311826564	10.3599409819973	5.26708582422375	2.89988731619322	2.90794524082183	225.764343215615	214.610118732674	4.83770859773912	3.50508974752838	6.31117609391893	8.86483166720485	4.37668490828068	2.97522374356613	60.1352108240315	88.8939464866603	228.035843621755	217.501803339832	2.35141242075092	3.37308473313854	11.8385797568572	6.42081779660318	11.3480772104369	22.0044117414949	121.208468857825	158.584946779753	139.900896671287	126.50253634836	12.4777364607665	17.9336813146665	44.2062837072577	38.5545623969995	258.52384972836	221.378665970524	14.6698121467985	16.9633516148765	13.6043804354592	14.3346635202589	36.7754951421988	47.534628526034	2.84600704378938	3.911853836139	22.3351222967793	20.2736855901893	17.9821004511786
ATG38	7.9530192232509	9.95791046326675	10.4740254350145	6.86339240500786	4.68658671864706	11.096188657005	16.5673995464712	9.35892307763092	7.41987321530283	6.88937188792743	68.3083737824029	38.133197728887	6.8767448586724	5.69420989538383	7.17702853554546	19.8019876443911	11.5540335167599	5.6389726297234	41.6721282538646	36.1034986190137	50.3193250198687	46.3765396948055	8.02201918264609	5.99350463904836	5.60946762169616	6.08477444905065	20.9704971051619	29.3240983627753	42.0235550958977	46.8193754411154	28.4096473933044	35.741002856774	20.2708252486389	14.758879492792	20.9462571878638	19.1180193411921	48.998477475871	59.9404910643686	11.9159794069263	20.3059096004512	15.7125371456668	15.8484440322701	21.3856497227206	28.5873047485707	6.47291598915491	2.78032221708773	7.21571885133359	16.9522588901262	13.6326890452946
ATG4	5.03363396358369	4.56294582993029	3.57458904341257	4.54272655578457	2.90808218385714	4.59022123322033	8.22419916054496	2.78750716666643	6.13881095020991	4.36042197559008	44.1456492276888	32.130613386437	4.3524293703427	5.03498784933462	4.67607665160028	4.691531442058	2.64716356456911	3.67398818712326	12.7301234188078	25.2029688631489	37.0327939748754	32.4396936109072	6.22220210850749	4.23970531569855	6.96145045399129	6.22982421909727	11.4108983162838	13.1010753950485	33.3774125737086	34.8623293952209	23.6725376359694	22.8707213829109	4.71684928275324	7.49292442824629	14.9470165267353	19.929689838512	34.7746690165741	31.2427266568022	11.6455259865289	14.1750664520655	8.09981674285495	8.42928774032554	15.9239979109555	11.1270343396943	4.21732597394901	5.69325921367527	9.13398946279812	9.46714941017001	8.88221568012018
ATG5	24.508824790812	25.2151123542261	22.6189036595042	34.1834526304445	19.6945532883056	29.3596588401273	331.347067365392	300.212848495039	25.4064890780011	28.9513142795826	61.3827922166482	66.0673363115641	28.4168157140001	28.914156260087	130.694141246785	172.732895568131	28.0118200157491	32.5830828026307	60.6183808589282	50.5728750043159	191.787821671534	197.842338493984	22.0058796118424	30.6437487966585	79.8857539363604	77.7757452261427	21.4662816998598	36.9688166287272	37.2815817001809	27.9336577932946	430.170661185085	452.933044324566	39.9302633699862	57.3227799030679	57.4593298783267	65.1645160351104	18.2313811664173	56.6751525505282	54.2477784084122	75.5546531163014	43.1729566453967	59.4645893618118	53.2559043520154	54.6059926576097	11.3338752600328	18.4994550455435	47.505749518978	49.8671783784873	31.0315911286027
ATG7	2.69477348873344	2.81176285067763	3.20395228886001	6.02927416467519	3.74941051984788	3.82943636233173	14.5539376027097	10.0419770379218	2.79346435312663	3.11251465852033	43.6707713054662	33.4358067910818	6.40776707218715	4.62255326297569	4.55971307618636	4.06645601220782	2.50957676205571	4.57771261851819	16.5941066334461	18.2648731840089	41.3035044139345	38.4916703916443	3.39770924854219	5.07704950603253	3.16783217426303	4.29530216660693	8.65424836209855	10.4881095209937	25.3140930905448	30.8470129868256	38.5814147144361	32.1682696374888	11.0898134156163	6.81932720976756	7.88597335547016	10.796518583697	28.5356258881565	32.1576394434409	13.4586104642893	6.80871555657791	7.16692645695339	8.63045353988364	8.05138749941586	9.53972085011045	2.51311675318686	2.35520413411246	8.96483854627872	9.57343369976574	3.84939570077311
ATG8	5.03805263673427	12.1309688833344	19.352227202438	16.9081193500658	22.2663184689569	42.9560242702283	314.851751991533	308.290193529732	15.667708223912	17.4570418983907	889.933310307045	915.405094474124	19.6031607692029	2.25447552105592	153.443311291518	171.055838293511	22.5206390621387	15.6282136917467	209.832902875037	262.060714883169	893.272491530675	1019.34050090903	14.8218210370413	13.2885853670618	76.9917613422536	77.0909776499979	66.4215671853717	86.688310703381	492.487623614714	532.763091125958	968.399929834791	1075.45217138222	68.2180445797346	72.2452678634957	82.93129435022	189.7356898931	674.138047172032	522.100154109791	99.0740833263016	40.1979043101654	68.9088957050741	57.3695057999038	142.999293722118	218.135767276709	2.56278611420817	2.20159671717693	82.2779716704551	144.974273153437	86.3599982315729
ATG9	1.76725202937401	1.70212523108445	1.64114987511883	2.34634811008147	3.87191909170039	2.10743953746679	7.8663642767734	5.11916880180952	2.81843665091177	1.64866072559062	24.0131521501375	20.5837497036584	3.05617421496806	3.04164033476968	4.29373853915945	4.92333669077737	2.43071202462536	2.40970375886412	8.40159047668955	12.3425128882479	25.203467046251	20.6588534352379	1.71402473737398	1.53672092151096	5.43339885581676	3.12024295684726	4.13599524005479	8.0198912303763	20.3523677553542	15.7094374430913	17.8057597400972	17.3732684479463	3.6814929924376	7.1096020841342	11.3379046116955	7.40721859372197	19.8916260729297	19.9792232491351	6.11048467176672	6.07411424695613	5.78477301160689	5.03101812902674	6.49862958432765	7.55184148066149	1.38303562330437	1.30693153314715	4.93359507002396	6.66469030071723	4.6605359746794
ATH1	1.32596728798259	0.00599287170805882	1.57667769273495	2.0118275766983	2.14116597784441	2.48185793519548	5.11562116714583	5.98023225674041	0.00652862242783155	2.5823727867606	46.402669173672	37.2089315271557	2.95952798124682	1.32175300638831	0.000193696640612816	6.75382143441592	0.000367857738012582	1.57354595170518	15.8822241408907	17.1902260111188	60.5652586174139	39.2192628761741	2.59910379573383	2.68635787825673	0.0116131431701137	4.43746459758605	5.15516618573562	7.59475433294346	32.9353219286571	51.2244317019693	34.3374275688292	46.7972271426135	3.99698541994298	5.59292832728323	12.849617696074	15.4365204153169	59.9467000172871	54.2200693988344	3.70350431239212	4.10796428182371	5.03828263407985	0.00857593834276814	17.8262426562629	12.5218958573762	0.899385315399347	0.0058483240437287	8.82283925905872	0.00100813691062232	4.25884075966376
ATM1	10.958556266692	14.8547789927477	10.9132945124273	9.53499362887037	10.9621516963207	12.2694224817634	18.7888019317894	15.7614762917888	16.408765313507	14.5910096798208	10.5239323835491	2.56063407675752	16.6699531110572	14.7115192523521	28.8437805955204	20.2114178313104	16.3286554132162	17.6264127629037	26.9925604315577	15.7380134257453	4.47904938899025	4.30321986784305	15.352286488954	15.5994235960993	30.0585870485653	29.5001676067485	30.459635827193	32.4245821393801	14.2974873826851	16.8140544661495	1.72601421395624	3.70499938737158	29.4184974358143	33.2093065769378	30.7328005576215	28.944674441787	12.5028700090512	10.3240720331339	30.0258378804222	21.0495680100145	21.8972542262735	28.0193946568125	23.6467441299244	25.862661803582	14.6587021340867	13.6569914089145	33.1421108749346	34.6054595424552	28.2639620591533
ATO2	0.588113053680034	1.13288227264161	1.29089847523327	1.12786414651216	2.31044318370923	2.27930243828274	31.3090053602594	22.1465405657445	0	2.03783936614816	465.103330231202	357.681857735334	1.01705215697736	0	2.65365403756544	9.31845288884489	0.657235762474414	0.521244533976937	59.2614933123526	85.6562629919848	344.413089505807	290.986294811467	0.494347643902046	0.443209705366035	1.38271038270201	1.12490144798565	9.54298538418559	20.2391179900544	251.71451416828	328.270507858064	263.106985701153	232.914186025654	3.74749907974477	8.92962166943508	49.0500234346158	57.4925226949152	507.272108159265	552.956629039488	16.5219498781357	17.8314231218389	11.6191932825117	4.1856128224592	72.0431621842136	72.0680428319476	0	0.514005561822991	18.1421425925564	23.8183149850962	1.26014873810438
ATO3	73.557084175267	68.5044878079968	68.7191682913475	58.8743620671242	56.72013573226	65.968666210182	70.3543371817418	65.8146589350321	71.2098083516056	69.5123946016737	51.2283878751752	38.3528427388042	70.9619159039512	79.9778970450171	105.604497253684	107.329163252099	76.0881229140143	64.1159284065262	58.8060441852821	64.3925578783055	15.2063259033824	11.8163913040348	73.5823101348975	75.5913072475712	128.632558958639	129.06698267464	60.4183053868418	95.6356980913556	80.3049218951483	98.0849721700906	9.30672597078379	9.39114739879884	88.125125743553	89.2253233840686	90.7282005483239	83.7830364428175	106.508175148242	103.088906609034	92.2218622473918	90.2179352191025	82.2245813126233	84.7997270703736	79.9173625105664	105.284398894812	47.0037373799741	34.0036071713207	108.104558785571	125.691834996069	126.349092109847
ATP1	57.6612160826089	58.5932785851432	42.672202266071	54.5293757961507	131.187678164357	126.497859591964	67.3444420050442	56.6489763304802	55.6602617318477	53.8448270715116	714.11663723511	612.090397150653	53.7460444194257	49.0015678531355	76.3820342558577	62.8638738652117	51.1367984827497	51.339406939285	583.513135266649	639.889258476598	451.850747660817	394.945831798461	46.9116933597771	45.0490836919655	83.951742515862	73.8641811515834	354.082936532493	453.171098519188	626.600975846411	718.004384748138	219.564669437252	198.360335640945	292.841237029524	308.343252970837	428.428276222999	432.786080697144	713.458935768486	663.337968256267	325.958614423175	309.387279951791	267.715461964967	264.297441014625	435.438802731538	448.152655519143	38.2114072973552	30.0521529181395	298.536164878051	276.824796519339	231.799237536518
ATP10	7.75348774237853	4.17969794128852	4.41701193708247	2.85954913719858	6.42726963972446	7.82152987371117	13.805250421062	5.61497615115635	7.33479575289294	5.12662589146497	32.6848806616283	36.0645182697702	7.08528706116082	9.05563521639553	13.4560179910381	6.74271111764583	7.28592534252594	6.31057475820189	19.9069646719723	33.700871253694	28.8047130968319	28.1900044681751	7.52015117632158	2.44753732576472	4.84271385869805	6.70516216760917	14.351417527548	17.3387264611427	27.1622758819501	44.2154219021767	21.0255691536539	19.2516875208554	20.7042940735726	10.555460047041	22.1457551511766	21.7442061402938	40.8396928955611	40.3069463174392	18.8377141755595	26.6137187195491	13.5220100534134	13.2629860408708	14.25611838625	20.2549767875323	6.6744390605294	7.19726538732165	9.43047031868421	20.1767274768876	17.8580124840748
ATP11	19.1424820187169	20.3777872755151	21.5615438764111	17.8723398454337	38.0960621879739	29.675590742586	64.1295156134871	56.9088472024985	15.6659917245077	18.7642483802762	114.290800420139	81.3602770163382	20.4722019315303	25.2473613098701	45.4597798592721	38.7684494397882	28.7106975916631	20.537692498852	92.0459871808175	119.105341806409	79.3112507292156	72.9929584794517	22.0185807857371	23.5372350329827	41.4526115375818	39.504846248273	72.5450224262107	94.1089895111448	110.908828488366	93.3609533451463	63.4103433907759	72.8681312064843	74.6305835133653	74.7869038079118	81.8164017145766	98.4907086344517	104.746663297191	131.934857331382	70.7596482507164	87.6217473496603	71.1981078594826	76.7231878095549	91.8105141701048	87.2446961771915	18.4499688406788	19.3719400703377	76.7841675416842	71.9423514005134	78.7951052350319
ATP12	15.192484445995	8.96837904835364	10.7571504251435	16.4474993196782	18.7717529620302	16.3344901814284	13.6121793604027	6.92057069648448	12.7007390035797	13.5851818185458	53.2119737820227	42.0498447900125	13.9840347135928	13.5969618268464	9.95090672410976	12.2023808342341	12.0489372881513	13.0306893950976	57.9428043385483	38.0064849912839	49.7566361207609	39.836183152401	11.1224787128259	8.49462535588728	8.06556568569791	6.56172189400221	31.8090075395161	43.3681616911005	52.6547326543101	42.7422450970064	30.0112700022299	20.6477916005956	36.6931119876264	25.6305347807716	37.6468857431752	52.6212781435382	67.9361289574543	71.1025614097872	37.6321888531532	41.448977252975	26.8127548281519	32.7863000353866	38.0704513146249	41.6379689245544	8.47607050879861	8.13815559347496	40.018247659235	32.3834980403824	32.5528623624075
ATP14	124.083747665802	96.0357647063443	82.681070605229	89.2362660152336	213.268421305539	192.360249900953	261.563492754746	187.73843606989	107.955907776525	105.569447926479	1170.61135889521	995.324500225406	80.4687833962902	95.1876812430911	154.967510237081	195.603132314056	96.5716894808626	100.155847066798	937.75101258614	934.626913343047	909.631955622966	955.367018266012	93.1254822995207	86.8319232022493	192.751465106527	182.241330957535	548.301116090859	582.790549104362	936.655688206197	927.594127892222	667.136743832826	653.477692616895	388.274904688852	429.885956471855	593.31039196727	667.580507837804	1032.38985037384	1031.22493715738	506.285498054311	438.449327093405	424.296073126033	419.475290651841	708.365934982506	644.417478294806	74.3908746815801	116.193855637488	430.218366395117	335.336316717755	341.837974051311
ATP15	282.301375139977	271.896589646931	419.170246035321	350.309470483074	945.94286724367	965.370324388175	1268.40436875514	1485.15177012222	464.780973378142	503.475593359954	8073.31033933432	5112.59531340917	387.683690749451	356.686573866224	1048.99760106811	1202.81190189483	445.380815308638	470.969398586481	7228.63085417877	7883.95034148817	6817.12347044648	4929.75440574097	404.792485349508	325.375742073218	819.882941642333	857.588475668391	3132.41739028951	2816.52898904681	10061.473118913	6300.02852338332	3446.17841438387	2635.27991410823	2751.16192943272	1989.07243762473	4701.61068391351	4417.64601511805	6969.83070384035	7697.09006932494	3110.08213737985	3047.41584257277	2195.60433321844	2552.7856013668	5308.77855819605	4313.99129975023	320.991315282668	348.321735179827	2440.76611045775	2265.36802869044	2063.72512418194
ATP16	103.356220937594	72.04076325711	94.0296139845713	84.7620608217033	165.622074930778	157.065067500151	179.423093192695	188.84237410284	93.0442344837845	97.7798351242428	936.656207121285	809.944111855334	71.7304914796783	103.455938724332	113.521408742135	178.53978770702	68.3903108719827	98.8360333933315	873.376239163466	938.909726492646	786.410444149282	723.338714735809	78.8756101742435	79.9405810782674	108.710586247438	101.447048317746	457.893745558291	521.493968284789	859.921119430809	883.627223241792	617.659341131851	563.41595741787	413.786679521541	426.741173536053	590.994758833462	651.651268188393	921.649116681833	855.853218208957	427.898622691082	449.22564899978	382.354687303825	387.151294179289	629.800588920437	679.929731802988	69.1786171521102	45.1660667334738	409.646606396472	420.326216221449	361.331193541335
ATP17	148.174156200176	74.5728737313752	111.971968913265	105.213479123403	126.69456455193	171.43663889073	293.812963367669	328.920984890771	93.518486657908	48.5807208222087	1149.26499208821	1163.62905796735	77.5472552085426	79.6211097650638	286.706465277195	197.967828113096	84.8539319636089	72.8461713121592	1180.21016665278	1240.99286808474	1117.74214509633	1317.95761356895	74.6852790196799	30.4547599822887	107.417129750394	92.1300148369099	618.659686253199	841.321677164517	1271.94368801062	1194.15759631649	1060.23363237	964.15600346439	351.610911462423	484.735224470856	799.938290016985	715.362118948748	1041.89028872331	1322.09599864227	635.493931122172	642.408709678923	461.090364898835	425.468814199969	892.996264800383	813.863015331338	70.7513072518317	68.9982061916695	480.508624852069	664.109052533883	250.954218055862
ATP18	416.221731057421	343.613648466169	435.046745834816	475.126873490314	1167.96645629568	1075.40787123994	825.767835666502	886.303362058361	369.828102298674	412.062868464548	4432.53675101109	4401.55421173367	565.549293737124	567.634175821843	849.595230053637	717.811542350069	354.390787393091	544.559098071353	6204.57381863059	5211.06822294706	3382.97147752181	3537.36200358216	483.141036415773	463.036656873574	559.183625710184	720.29355210375	2773.88302284697	3459.11838355879	4922.26483417581	4537.58772925123	2393.74646814827	2839.16738897989	1799.69972871537	1905.93895423906	4089.09183270701	3176.32581154886	4693.66291866757	4966.90164403344	2412.83008508666	2435.38366988308	2168.75074480875	2539.07547527798	3612.29234400103	4080.32589231175	504.108950364539	173.225080783231	2841.26064408625	1901.13535086237	1741.20697817209
ATP19	144.533811342543	197.210684280196	132.186964384046	173.238660905499	532.322876784945	401.444909604471	557.569458913783	368.515370754607	324.626028469636	198.239563489445	2400.82671038342	1732.5347359396	156.21817510468	194.032144374026	217.385460186713	408.944235676864	269.201292309802	256.199400032659	3527.722016746	3850.18739827893	1772.24436308952	1404.70236678065	263.228528246156	181.537817869861	141.588183614572	322.528454721357	1832.24486035163	1687.58061871508	3797.36032225826	2547.35826632618	676.109433530697	558.197156519405	1189.59489549482	1137.90409250856	2035.50929924596	1949.53004505265	2342.13120740142	3517.61798972144	2052.75798546582	1633.72185680265	1079.97087758753	1302.95518618843	2267.13019492032	2085.99783934067	257.326733927714	157.901142451242	1092.79173475497	1360.6891213113	980.691981407818
ATP2	107.923252890606	118.481879527289	81.8799159497061	93.9287805212867	208.63546966038	211.231027495474	207.61857949199	166.207744311594	109.514599977526	104.589783951822	1398.25451662986	1297.09164156472	90.6097188194864	99.6472345108301	190.802574693777	160.494030855855	108.83292301278	105.242421829157	1139.71249483071	1225.35905950843	1216.35026785066	1214.18541557143	94.0673760060131	96.9979465085544	204.864212582826	204.793302434287	661.902615830614	759.463607511385	1217.76941503941	1395.7334382354	910.160017562722	891.397137783409	502.160784030556	542.853338698652	851.853655299833	823.250956819607	1459.98286138858	1322.04225927154	640.511916172724	603.00218981394	476.468357339733	516.788852671252	844.83951168274	908.653323810076	47.5113426037252	49.5260383000077	538.935837205541	568.737526540839	427.104852281058
ATP20	39.3074301932836	63.0981443202971	57.5194393337408	47.7423537934196	74.6371777278773	87.3419951347198	151.636745759088	166.522216804431	38.0307054307181	63.5610276844682	730.430120811192	462.91440954381	36.2539617629247	53.9416330221019	118.240598189477	59.3155790048543	26.3563654195836	27.8704649938295	630.210591117666	555.148100164779	458.845253226807	500.10483294248	39.6485231072454	63.1951034383614	55.4491723687584	60.147369676159	233.867592307278	341.398528288974	590.792126314587	599.934455918761	365.521255904074	334.896839950015	200.375545855475	212.204170272289	396.850382529251	470.350501591243	509.573932457821	696.200265198375	309.195459753202	292.720589035596	195.142326612369	234.991456224541	477.597455002321	415.312423223806	66.6502114814858	34.3542205291472	280.55261127156	189.914500836058	162.833165807555
ATP22	7.78656607769574	11.0520718317149	5.39727696527344	7.07342363030434	7.84875591487421	8.7356474140332	14.7029546590952	11.0920934732072	8.70899195340626	6.74520238108362	43.1691541824255	31.0264265437249	8.32743471741603	9.90306255262011	7.39664429759427	9.27636380594559	7.09877411981963	8.89891825083082	25.6032220598379	25.968329141106	33.1657530031579	40.9160718620201	6.20062859692341	6.94902308503436	9.63519791870739	7.05481307596971	13.2998050363053	21.6586849766424	35.730384293345	36.1891047737011	31.7189334894031	32.5181687837692	14.6891060152078	15.9018679648974	24.2856825611003	23.6436213803912	41.8185844851031	44.4006100568333	15.3507929281374	25.5051730740217	10.8993783445886	19.8334577193953	26.325632818578	24.7749878045526	7.92180611161246	9.13351477474197	17.8476887738282	11.7929499239077	18.0014499316707
ATP23	13.7034903355483	14.9982888012134	9.57056641732533	14.3345932693783	18.3528661746378	17.3812643711696	12.9757052085091	8.79599268314192	16.7881947382801	15.1082756453507	20.1886108331144	34.5819772085466	15.6191882458049	11.7068812112937	19.6738664912174	5.63968687614687	11.8335904705698	12.1453558099723	48.5385312627986	40.0584762872336	17.413987975731	18.7115790215511	12.0422443866287	14.082479004092	4.39338342961304	5.95703895888518	32.8484938479125	24.4979963365628	29.6219209085284	43.4599108662098	8.4764644271286	11.3719966652504	23.8143914850594	44.1353503263996	35.5447991673894	52.9059033612002	39.5753217946064	36.3830989895446	38.4974194697731	31.8075045458496	30.2921885302999	32.804874029399	39.0819315644436	41.7264825935056	16.4763339066158	15.2430690788471	36.1690641256105	42.486817781054	25.3584742234967
ATP25	6.26353090426217	6.70300304931696	6.36494829538619	8.23041251053341	10.4806122426747	11.1485157832876	10.7390178384796	11.4656424565397	8.65724780200889	7.03348494625642	36.8424407273026	33.9547965716575	6.2182386046834	6.64381075024665	7.85053508275735	9.45172664361403	7.7773935162225	9.25223301445877	24.9341483126296	28.9604441408008	31.7448414242878	36.893538972531	6.82486092721443	6.11887846858113	13.0898679069136	5.76833769449029	17.8801901551267	21.0987932823738	32.6877314587341	31.8658474052201	26.833546656916	28.0180755998591	19.5861870725387	19.9596791975766	22.4027339501724	24.5368315055177	38.4108851783935	43.7102606656229	21.7236890245016	15.9182056689391	14.8073068059275	23.4444730186097	19.407089066383	18.9515358890554	5.42826190697832	8.31272620515694	23.1523916729993	15.3289355456641	18.3915053033565
ATP3	65.2936716771813	49.9107837913123	48.3415875120434	55.6524699472794	129.273073323692	105.639693687109	87.5594115133467	75.6162656797995	63.3875544533658	58.8058047962447	676.868159172307	498.245878281911	56.4577849635286	56.5812834304016	70.1463852243847	58.6484595339296	63.1225918546469	64.2995444869286	635.652989652005	743.95853685132	560.43220810497	551.252086751731	40.0736559548632	51.549511452891	92.5940497278453	87.2239770531204	333.191179486871	444.557198210702	672.682366293272	671.149288686814	349.06865583732	380.61672896834	288.101557569414	314.725312458199	484.511216358133	504.921471430059	645.514812052252	638.568148803613	342.597283404737	371.293913904835	263.038118187671	288.406380304911	470.676025849169	463.134721173931	35.3227411611957	38.4968069067138	317.830891467212	284.981220091685	223.181431250862
ATP4	69.2971376635578	69.4957853422124	81.5414186680269	83.5736000671718	108.755043919275	116.841521169061	203.390041576522	153.006468228463	72.5758096517371	79.8328765657513	745.586619736488	652.634355752674	72.274057353185	82.479723979851	141.833813886861	127.748624267253	66.2643867121695	70.9155710272905	673.797677289268	662.1352375702	555.026042042121	560.505890895135	73.8619472067157	65.6828936941867	147.807157715091	118.881796568777	341.971176899279	391.607255004707	645.509004270878	705.621679043962	399.811142729941	373.226587581337	319.793989824553	316.977836621621	459.415401073341	437.348024368212	695.977063237633	778.038609395283	367.947196466922	367.088599357174	327.886158746015	319.301648367978	499.468205400247	477.404880644125	49.4232800849063	43.7066907696165	318.90255400675	312.171573343319	238.797215883836
ATP5	75.8735550604659	59.6378120011912	56.4708529381977	71.0812597767068	110.492956217648	95.3147147850337	145.339424414408	123.153339949542	63.2837339248799	70.2589262101347	638.818147854209	537.006319403405	68.6221471185005	61.6611861945755	120.019740805743	104.624151443886	54.5780234497138	51.014570211057	611.632194360732	598.803215149514	465.814409660983	406.844021611761	52.7806391182578	58.4937254475597	88.1675976944154	128.444156325112	300.713842988809	418.030193162678	589.851652066895	616.093056922649	314.501030986783	322.115767042179	232.010274877416	256.00515894699	407.703359675413	406.708669392251	587.679394582613	583.348930154525	326.670275969313	304.779548149247	237.244515172435	256.962287447014	445.568915520519	416.076535861937	49.6863233903813	40.3973324978433	221.553027636393	286.277786064282	233.58341041306
ATP7	82.7363222257917	69.4417925521075	75.2361294079812	70.2675843737317	178.76894104351	145.668352602659	207.917814238001	158.561054165917	61.2618637394603	88.053191536045	1168.41308805872	924.64901160578	60.2978951951503	68.7580880171951	149.326881522767	155.171088100599	50.1926014610884	77.5190251290261	1008.37047431609	1218.43261061613	805.218263411849	847.96551377275	70.5387814382247	76.6029036244877	144.500787093528	97.21163405048	419.536011669393	557.82868643117	1103.35428668719	1035.98429980679	424.224064883925	413.316557924875	331.383256780842	352.93902211628	640.752631781883	727.357911384118	1174.21687111957	1115.74353246934	453.795501631994	456.440415498044	317.938423193201	391.99574860631	614.46085526044	768.597647094214	51.7063643281917	53.7164690476066	360.317590297036	340.115982068488	364.68795146878
ATR1	10.6468793549644	9.74178792119266	7.01091394125736	6.89112904483012	9.14964168852461	11.1410446163917	13.553902470053	9.39673367370184	11.8645823098916	8.99238953170958	17.6853459872889	14.1058535597476	9.20605193841106	9.52875241351426	9.60805301266913	11.4472296191716	11.6007398750773	8.96447036106368	16.8077911259549	15.1039105867615	17.2325871153879	21.1654724714579	9.17312578054696	8.82600261775015	9.38688953400403	10.1822597486999	12.9570667581475	13.7399041905791	23.9096022755886	18.5713363528649	26.713393684442	16.0737071955343	15.6886008146698	22.4522990641803	18.6941627680928	19.6218548391522	23.5733457368016	24.0730885111694	16.9492222166333	16.989980573387	14.1580012900856	20.4589920601182	23.0625976504342	24.7888699751522	14.6229292572208	18.1452104227094	13.0407835261737	29.5026763032876	16.5394333407234
ATS1	12.8341472498273	9.61424887727665	10.4335790078533	11.8506371020021	15.4060214108666	18.7907086934857	27.5057225028186	26.849628595373	15.7679573262179	13.1765227955247	33.8940581755497	26.390285185828	12.3303656228584	14.0388025906337	32.1718881139318	27.9744263723428	12.7489107012612	11.7961343984553	40.2339938996862	25.1748686790306	36.3698214372275	22.6787758068888	12.7856987546212	11.1048646143563	33.5268723683194	32.7308659147137	30.8522143194282	33.8846524326081	33.4890746438505	45.6022185458395	21.8314097682931	27.3698666010747	43.9188390779799	40.0960378168722	25.0384892450157	30.4707175884149	45.7588013495075	37.6167534188118	31.1587127271259	28.065674885012	26.0062095505676	21.6511381560389	12.7818551543433	34.1723274177442	19.8273638433421	10.3860067754647	30.1890377943563	19.2509338789109	25.4626598678086
ATX1	151.856712963326	91.4128212806806	135.412239336318	136.511715498633	167.787604091858	132.420931207812	219.681711081569	178.701252016589	157.41849923988	156.212515237544	476.807515512402	407.17478159855	188.752696045784	101.931536297563	299.774149426965	322.247731410372	159.097790494347	109.35419402454	739.591425907363	718.095275284604	265.339873307035	268.341153463415	87.7561336514083	164.50941947511	133.885726087491	308.613626411235	231.00912515263	326.620438612285	568.372870852729	331.103591248934	258.314378381772	106.632675375001	302.387382099277	176.130552418353	374.955788854807	471.514655378504	328.918367010465	518.609781981028	195.53066226619	393.784265849247	375.023863945545	229.662713761547	368.642359430648	341.157902015843	154.494270195439	107.83581222646	327.224608401639	404.612746504438	305.046319001365
ATX2	19.5316214798665	13.8613621153691	9.58969018107374	14.2928242621846	10.0962014113893	10.7569455555106	10.7072472358167	1.20970506732288	21.8454449509355	16.9194544675265	15.826200207326	12.9709791713643	19.5550590641034	17.4804187301317	13.9151897522372	12.7976836179287	16.6575546580578	20.4996243242208	28.3131653212377	29.1663889112463	12.8569560014814	12.7155566254587	19.441879642669	15.4940173347514	19.3349951982479	20.6455473302877	22.9356331772612	34.1130083015768	19.9167440255618	34.7413573319877	10.4918416284803	13.7149189538832	20.4698479742494	35.5522750963677	29.330656455672	32.1247199262448	22.7606118838905	27.1170208176118	45.2440480421856	32.8084496747075	25.7774758601855	24.1433064260991	32.249419869359	29.3928859219546	15.1646111209305	7.63677113111075	27.0477703165909	36.154685278922	24.2291681802315
AUA1	0	0	14.4216500326136	0	4.30196678376127	0	10.1385165055895	10.3090323337321	0	0	7.09842221719706	44.2152308092099	3.78744190894937	0	0	0	0	0	0	0	12.890157181442	7.74006801162744	0	3.30097650098914	10.2982351794794	16.756174797548	0	0	0	0	14.9017709884662	18.45439843522	0	0	0	0	8.433271298401	0	0	0	0	0	13.0870599127301	0	0	0	0	0	0
AUR1	48.6572438386157	45.619366189003	37.7142388004257	42.4640636638227	35.4226726575547	34.1142747030688	23.0337331088058	26.2667049758172	53.1716144503556	48.8448998715544	34.1206343363287	25.7198031041267	49.294007433057	49.2165034161397	35.9265254985611	41.6091372334236	53.0947929966149	50.5564071569318	55.0321688891717	54.9838028091384	29.7225371499312	27.1788685494123	49.4025493545467	54.5792383832557	60.5892049081307	65.3050741759674	87.2326610763779	86.076326435171	52.0583598880752	29.6260715648734	13.3538443976433	21.2682601280651	89.3304821703377	68.0708703666414	73.7868026259534	66.8221830753137	50.6234788207644	54.3481706238065	76.5939509571322	67.9130640040304	65.2676278772449	74.0614400235396	69.6571122498447	68.6467403598179	65.0970154477138	74.3764040947884	71.4909334053802	69.6744982870422	65.9877594849087
AUS1	3.23920832859984	2.84456220915257	3.03221600395557	3.56280798037166	2.90065900604487	2.5846386044344	1.76413198015997	2.24225866547574	2.66653475927351	2.97105468038776	3.55105585634728	2.40425310526822	2.80085877794673	4.2632914905969	2.36432483927588	1.72518696668239	4.47166733765544	3.20866176680393	3.71200917503747	2.34267414354647	2.9438503219319	3.1986617665408	2.88292882218755	4.16427852996349	4.92781947607459	4.92013307079129	3.09182405837367	3.51280743819982	4.53070235368267	4.77770598758448	1.78266276241129	3.0773362988165	4.24951720855992	3.37528034939689	4.18201084811535	4.42771173097013	5.31937937683265	7.53943219045262	4.28234073063836	2.88859118880921	3.90928332988819	3.39023137434202	5.9776086114921	4.51417931885816	1.45388769209189	2.41471026264546	3.97619341449254	6.49841140142461	4.6951589801625
AVL9	13.9669814931422	13.8016672829447	14.3332498238811	12.6969453305369	15.4990202371203	18.9808469951854	22.6717421868952	11.9534443050898	17.4870591650984	18.0699880965361	29.6893188468934	32.9581102723706	18.9779216323196	19.480758124457	21.6890141055061	26.687581439418	17.6355745466806	18.3271654060576	32.4125068267283	37.0545912542787	35.2306561843913	24.6805825600857	15.7043545794688	18.3174595994313	25.1612796284414	29.837479042405	29.4330235719505	33.4406534113531	34.1850379050769	29.6621905563107	23.4498467873608	18.8507479030728	27.4508171837917	31.5193872930846	35.0338349488146	26.4528600630408	29.335434881041	33.493936070798	29.2158546733051	26.91938228404	27.8422674005625	31.240985708682	24.9296876126513	29.3403828408408	13.4713869329157	13.6337562199809	32.2564023230936	31.704506912628	31.8703031557504
AVO1	3.98998779900097	2.85475524055555	3.37806516229068	3.93524619134259	2.23927215953658	2.82763685982321	7.38823517797734	5.36606665715206	4.60882858601926	3.95012594563932	8.128781325647	4.60300633925796	4.33717963529676	6.32569460773344	5.65820161732977	4.12864876288435	3.05756347955516	3.94046540954176	9.64927081835164	9.48775602539421	8.05156436261084	8.46067392658281	4.31208814589065	5.06878124540385	5.89651603249427	6.32341887569427	6.24311449007109	8.12650066376592	10.6418941608419	11.1852681847398	13.380367127927	10.2463621808311	4.90328415489964	6.53902170715937	8.75721620235137	8.22121006921163	8.55992160206393	7.30318048189108	6.61872778989454	6.73094381217056	5.02426513594002	6.65295280447796	8.51511265324497	6.519162234392	4.29125152274468	4.6828106541673	6.82647437393149	6.80390054198548	4.88533673128469
AVO2	5.63499316258552	3.05286336574417	1.93260847286495	3.71476640472999	4.84255186655487	4.09480757719254	13.042894491757	8.28889552497913	3.65085580557439	2.74576865775124	21.1175409538455	28.4407654869803	4.56789069036558	2.83680127632488	10.3292704468269	8.76899267344484	3.54221969230498	4.36997499889087	13.2489175145179	14.6555401050855	28.501698230935	26.7605399676373	3.55242063700137	3.98119561604281	7.45219010186657	8.75727012817127	6.42906710015013	5.19429186579872	19.2298344456983	23.8048719798138	19.1706794919624	21.7626492112666	7.85453204544345	11.8831588236708	11.5946574952637	5.64407531137693	25.0886190174484	24.5529810917676	9.23441446492823	7.30615100964923	5.88758362505391	10.527362030083	10.5225273191541	9.78230288251097	3.58303463849468	2.46246385105258	7.02981820671987	7.50706011440453	6.03703791352981
AVT1	24.8134416996287	19.3468277478206	18.9330813886212	21.0739405563457	28.7802354130745	38.1006345282258	32.2723288226879	25.5846773617823	31.8466010446141	23.9514717523977	67.7858023817979	72.7570957564692	29.4247927564192	27.2835520711971	45.3178763911323	56.1656540611182	29.5783933301703	30.7890250488893	48.8954903393853	41.1237567320843	49.3766464521621	58.0451001328893	28.6043110876082	30.0975936217983	43.3373064606892	57.4053730144168	65.6678207538247	58.6706657131757	42.8721991469098	49.9804511439348	27.7371710733937	27.8780760269997	63.6215546242251	60.9981549580135	52.9044230252685	46.2037735041071	54.1435044883239	55.2139118862293	41.6039432994223	50.5328688553221	58.8997456955268	59.5385705244036	34.5973118482129	40.5421080044021	18.993422892202	21.8931911575941	60.0349728781946	57.928634180034	60.7628971681375
AVT2	6.73494655318208	3.24337717793206	4.36772548904794	5.57738650678845	3.60800421011413	6.1695622073903	9.21158146597836	5.04350655581745	3.80816467033619	4.77345575850949	15.8755648857595	13.1334537229859	5.29412126678181	3.56177288797258	2.76263790422561	2.77176379248323	6.50015083870869	4.8838661181829	10.6938640771922	12.7391814960749	19.3693334458096	18.3926081150513	5.14651038096665	3.92202411821038	2.15924465544869	4.68439061500099	8.07213816616884	9.03010873978381	16.7152514342515	13.3496854675839	14.0601497093876	18.4869286282008	15.1179265241339	14.9774302758966	16.1256173129869	16.1899221449008	14.7350732832365	17.8814397385669	13.1870554006315	12.701525102311	7.90919752065907	12.2010677786755	8.23193115930666	11.5042259664986	2.80306946476285	2.67557985007854	9.99910758456147	15.0084335359468	10.4952587356874
AVT3	12.7440458140753	9.74158607898666	8.21428954651314	12.607981130925	14.3045159201458	13.4845295907523	36.5209080776264	19.0436905646156	14.4689825592769	16.8223347977831	82.9384446915913	74.0209958992496	13.6431159544352	15.7506909783839	20.0804105946784	29.7621864428885	11.7551640680178	15.2392867647541	52.4534658652556	55.4806707577027	87.5082943775754	80.0697970059032	15.1331186234119	14.9397063926045	23.3041092245062	32.5011468774172	34.4651223566232	42.2656439456857	70.5460388206959	76.7442254278053	78.454236179253	88.6352962154013	27.7130997502405	35.4919050118304	41.2898849723682	43.4401603660054	98.5347357256332	83.8528988570623	37.5068769322969	32.9259750374207	25.5162534533789	28.2176746663405	38.6807430599309	43.958011854632	11.7305921605903	10.784562645621	28.6312597385014	37.0818436831857	29.4738323030128
AVT4	10.5683553365733	13.760365321542	10.3099297711664	12.1980896228693	14.4161249668303	18.6590366164482	22.1967532058042	15.6608943587011	11.3612050168436	12.8847404224332	60.2608384900111	60.7487265299961	15.2302784874284	13.8373904164665	11.9214847216808	24.8076858140357	14.6536830680773	17.8661077672253	36.2863091102294	29.9851148897438	61.913708775588	62.9415724996753	14.3121105179378	15.7814378232721	17.4850242681887	23.5833660588548	19.4510383171446	30.7890172270171	35.849868251467	42.2454097791279	57.5938585966681	61.8417927881227	34.2946343566514	34.6682133629885	40.8066518725423	33.8732715853067	44.4628509513743	53.1012828744976	34.4548293618684	33.7293994597711	27.661024431303	33.7074966819285	35.0842968669007	33.2556888795636	16.3269637908985	14.0259819119483	36.2236340996248	31.2874448581095	28.5156560807231
AVT5	7.41831040138075	8.38752764003825	6.01765541504917	8.65966161890189	6.65229125164642	11.2501873606966	8.2120081153371	7.59106217860193	9.02743027837814	8.66137544081995	32.4068829608145	31.7439126575486	8.08772880955243	6.63923581657628	8.00427522132261	9.49086298466903	10.8132771896341	7.1465542121617	19.06689543286	15.8619993258459	31.3225001574154	28.4971043892033	7.59112987783691	6.5628053190017	6.06646279677842	11.1045987538619	15.0466163978636	22.9920420054478	26.7002917737679	25.3168899798202	25.2377290229204	28.083734701029	15.927908945679	19.5888185681625	24.0685778350915	24.2938006597929	29.1861327608365	34.6402640226327	12.0813911424566	16.9848825650367	15.6855335372101	19.2821144169027	12.5276454414442	13.7015837307644	6.89087382650685	4.51027649515849	13.4611803641079	17.8750385408859	17.9684804272478
AVT6	3.65034241420288	4.7942822282816	4.00619528866129	7.000485605658	14.3405601532553	18.0056280511798	9.21726138476839	4.68613278947944	8.60007729765601	8.91147058571874	110.245853527142	87.9320557130593	7.17351964796017	4.1579816966752	11.9787559962781	13.5206549515356	11.4963687864846	10.5881861905336	45.9226474964203	41.4276824076788	91.3094276065779	92.6511867643131	7.81032414914595	8.75299443886566	14.0437247314664	18.4072742815387	26.9235981737681	35.0759818080569	78.9068364057821	99.8504206670023	36.6917452460519	43.3419418900107	31.1897195503685	35.2703080317997	50.2553951990485	32.440617270826	124.587655897851	98.7931156614901	27.9679682702287	30.7141986912416	25.7206557673912	29.7583192600871	26.7702201089158	39.0383841659927	5.40180567461823	1.74019051970023	32.5171433133007	34.6602223947188	26.3089106535896
AVT7	15.6986570323228	16.359588329302	11.757005650345	19.7847041850624	31.7029809869059	33.9793303707629	39.2765460766178	31.439325890639	18.007546081241	18.8901567925765	138.798949170038	116.270027335398	16.9927437822745	17.8598792662627	32.9928977849078	32.6390578357345	22.2730983247784	19.8962642230766	68.4089737883908	76.7535577297891	142.563517318855	132.073369298392	18.4965267807084	22.379256694936	41.5248511564057	42.1194976008048	59.881975537605	63.2176792615186	105.134797006953	127.598304677132	130.771072307207	115.927728982877	71.822359497771	70.3638258710831	87.9573478277228	84.6821100917413	163.366233357105	148.401944006609	68.3751414138514	63.9675309457074	60.9648654047566	61.3183159393777	69.0346900433718	78.280610802841	17.6167620816328	13.48016352439	64.4864531631343	78.3023486976705	62.9767792867771
AXL1	9.63979215650464	8.32409872680287	6.56664736460725	7.43725565912842	7.83529487060196	10.0485746849383	15.3879159226109	9.12725620072737	9.87801110415722	8.35056991823498	17.2380428659101	13.4217534874314	7.56882267093856	8.72658527014182	12.4988866101686	15.549789156235	5.57212481999059	8.0527054165938	9.82523571705815	11.1078918601584	11.7386264984529	10.3771579717026	6.42642430996565	8.35021202824017	16.4119108525604	15.8950454297124	13.2597405555356	11.984071065507	15.2224410337556	13.0458610101989	7.35069963380287	7.93606987104726	13.238243702737	15.5151671114672	12.645785501442	15.0934431948002	14.079702932299	11.9001806023632	13.281190817222	16.4438428703311	12.7977882766102	12.9327467235993	13.2421060498771	14.8450830397691	10.032684333354	8.81244224846362	10.8572911055214	17.2411997544579	14.482357401656
AXL2	11.0373518236566	11.7100269627222	9.91095164316089	13.4699117252924	14.1570978819021	16.8513327657623	3.09664092829977	3.54231504640651	14.3886669984402	14.9688478137515	16.2607122206211	8.86255063872263	13.4479138105532	17.9603551680044	8.30032855892697	7.57067994937718	14.2034124494978	15.008480182159	21.0823790616987	27.5198783422659	3.69102525620602	6.20574313942388	13.072967093083	17.0412226357262	13.3680516594018	13.7543663923498	33.2414462753016	30.5368915342976	17.7683731867922	25.1594005539204	2.84469293443636	3.28801919130164	35.9434508163402	31.7358888164388	28.3434060366727	31.6243658955394	19.6404574012783	15.4399257779818	32.2601356587487	34.9502639913987	29.800638470112	33.8496874270517	29.4795527219541	28.0025924689572	6.12493425347119	3.94630178256226	34.5514884735972	38.141672631926	27.9496460825365
AYR1	23.6393582784668	20.6502237930631	27.7538896536917	30.0474375857934	47.5140883475421	36.2206804395349	58.5336411502741	65.9874956445419	30.2040218565962	31.9072407579993	247.673775885998	252.497000271869	30.8980112618551	28.0449764090523	59.5334444182447	49.7750198735515	35.6330715401837	33.6198704158587	125.564336702037	183.014773712155	213.553451826675	182.632638358504	30.0365598860425	34.3869647479399	51.7005483519546	50.4733206214355	92.5505531572077	94.5944379016765	243.04207285737	245.725997334727	115.023576522901	123.529915339465	119.979447625161	103.875869037086	126.692242270646	118.057165389394	245.559015907842	224.779024653318	107.080275720349	73.6917107031963	95.2453837653244	84.5121974455488	114.9773395694	110.481907297505	12.3046037934137	6.2461929178025	83.7961158155646	103.120782356453	93.0584365691957
AYT1	3.10647533680834	1.79519719529845	3.06839789843427	4.46809758039384	5.49179240767809	3.13027413932875	2.87612616246233	3.65562367306853	3.86431081214135	4.03652039756745	11.0753641234987	10.97522185554	4.29774066535038	3.33627757240854	4.2050500097135	2.81262673682007	5.90167564370529	6.05716702430885	8.3473461084595	7.63868996256148	5.94218272911749	4.94041356144567	3.39454055651025	4.21394434040648	6.57321760082688	5.94182190163752	5.67078002744919	6.10884470394662	10.9430676429124	12.1918858854423	0.528422864448954	1.30880142379252	5.93841070086089	6.81301327432055	10.9088912145148	6.47186439130218	10.7656755492875	13.4624512836302	8.14521977349444	8.92297893452518	8.49788556126744	7.07480283798009	2.78443547795185	6.59824314639735	2.52834237820251	4.07253731272443	5.07327393312899	3.97296247467848	7.3218434182041
AZF1	5.67204583520577	4.4566759084715	1.80197828502112	3.00567756719938	4.69116085990462	5.90060019913766	25.5663303943352	11.5929504461336	4.64194041323769	4.78418097632481	32.4137605917942	39.9282622613642	4.00102122900288	3.74048303279435	10.4393059561288	14.8660042101551	4.67060621452177	5.55628691708356	15.2412305357352	23.4337048582835	37.3371072109384	35.3438807440933	5.89690946566252	4.38701534689924	10.1770685239062	8.56505723518077	11.5046492012848	11.3741563093151	31.8113720566111	33.5215446285179	34.7850111530888	37.103528991919	12.1268153166564	12.0871986323269	18.0182802873053	18.4190384418521	39.6585339089015	39.0931082811279	15.3754697371676	15.0060960472914	11.3422187707721	12.1104015028184	16.0549008972364	19.7542694377009	3.34085251528257	3.26139122386899	10.5633173745412	15.5900684818993	12.1534840846635
AZR1	0.231557233937394	0	0	0	0.227421859874435	0	0	0	0	0.200588950676148	0.375255116097416	2.92177440206329	0.200221271741492	0.207239028365846	0	0	0.517543175511824	0.410457959095882	0	0.875980103638391	0.681434124866208	0	0	0.523515889805434	0	0.885808313243703	0	0	0.815699736991827	0	0	0.650389320001074	1.10662512620608	0	0	0.371088983890934	0.445820394801765	0	0.433677843234484	0	0	0.988797589721518	0	0	0.235578951418654	0.20237825025625	0.42018133187847	0	0
BAG7	0	0.356072358631496	0	0.708987885247369	1.45237087692081	2.57903233346135	14.5469646942764	10.4411846776542	0.766472354968392	0.960756544619034	34.7488127247804	26.1228203194661	0.958995225569268	0.330868410454764	5.00436215328643	11.7153786158118	0	0.655319358545981	9.93396394300269	24.4747673812954	14.687348799865	12.4122282154397	0.310753627571782	0.278607478883868	13.0378064053476	4.94988436861525	1.49970966996323	0.908752291605742	39.0692834364956	35.4671897113874	4.40206762238672	10.3838671069895	0.588930952372369	6.86064471716644	11.3596489716106	12.4417867142038	39.8596687151921	55.0300560641273	8.30870363331924	12.3889195690028	1.68553148535484	5.26226435448121	20.9867577618268	20.537247589724	0.376116483072972	0.32310897895152	4.69591962895054	3.15209404670341	0
BAP2	96.5721999585834	102.224751347807	65.7939654043952	86.1148214172201	80.6434172683058	96.371682194726	108.524776796754	89.4879511373469	93.5805021202569	98.6099105346336	329.259191305421	270.787154026255	92.1764837939881	109.39472054549	109.463251812402	119.856796107454	94.3666873396242	94.4815838942326	196.189785669099	224.141488358357	280.420133650008	283.179267022414	86.4693806287737	94.0492147843481	163.431975066553	153.484019116617	155.18843077869	168.004759496919	295.407457246084	334.155114863754	208.714370606843	214.247243691509	154.584290289167	160.5611630016	215.027998439748	213.829886430292	346.71336759351	348.101476083456	186.547312300278	207.710215112166	132.230951098028	147.090291905373	250.900923515758	221.816915506215	97.3001997176074	90.3152039206284	175.238962593934	201.373755622808	178.435380674989
BAP3	42.8497743112083	46.9396665189979	30.2317608311282	41.7652214830417	32.6039561248953	33.5788410755288	42.5061571362661	29.9223040165756	44.9072235281373	39.9742980105635	49.9823154062787	45.1553742073724	32.7758597607057	33.0819496069609	64.802128527264	39.9690142550931	38.6771295667314	37.9775361201875	65.1620951028332	67.2450963055709	47.8070405757033	47.8440902737313	37.7990631912731	44.3575308727167	69.7457602541151	71.1519357876652	64.9455917138165	73.4990149674466	51.8355900548136	66.2212494114256	25.2309231902438	20.5000087300292	70.8857505367099	69.50922916979	89.9126458543679	92.8177493605356	67.5403883978763	77.6325666953339	73.6382420898147	83.4066706583495	52.9556701465314	67.0248345517771	68.9369397252314	72.7040123568519	18.9226872814708	19.9597142900782	67.0741261244575	68.7532540433553	65.5816716865294
BAR1	49.1134286420948	46.6010762184336	37.8912613289679	48.2597342450631	71.8770102033147	64.6418101358779	21.3851713136523	18.8837037102309	54.9448690768944	54.1290453436176	13.3966609945256	9.81719060753966	52.1377647397173	53.9652270196472	37.848709724354	36.3226783562104	45.3759527273129	46.5460916174407	30.3796003378951	23.4544718803182	6.79733878220184	6.87422800879304	39.0348530837274	38.8447946535568	40.0144309228255	48.8306588005981	86.3020967363673	69.3280613172501	8.56484415893072	10.6025174717878	4.96301335930999	5.4632762751611	103.414345384011	107.468165994044	53.8969824568185	45.198789956594	7.95791626597861	6.87178768337466	82.4205421607261	77.5981951869214	84.2475078836396	103.131839409342	44.3125746424345	42.1089541911789	63.0764681705281	50.5744433930746	84.7088159674557	87.0672484062794	79.7077976135675
BAS1	14.4440500814559	14.7300909699914	9.51130718192375	11.2430305472061	4.17237482744705	5.40037951324661	0.786645663317649	1.59975769845183	13.5638336637256	11.187474703159	6.88457288757679	1.71533339387724	10.7261543842603	15.3604692775188	6.51736178760033	8.84671484436353	10.6344780233929	10.3919684332755	15.7531991811382	22.1781319385269	1.25018826746408	1.50138907032482	9.99859646063274	12.9342032167831	7.19134385789614	11.7010391163031	17.2334960161962	11.6958176058429	12.2713720371486	11.8563245201399	0	0.477293269359702	9.74522122428358	10.6071900093876	13.0536193272769	17.1565484742397	6.87056244899671	15.6890077613046	13.0485237606519	13.5584786123394	8.78053270603354	11.3682812448763	14.7236711127774	20.8233152249001	20.5728726225839	27.326986672248	16.6510433905802	11.9530871949091	8.01038337337691
BAT1	119.575960492462	141.518130498025	123.059975999031	125.403935772908	187.937872539167	208.110512205928	209.862378305058	162.534656330633	187.639962945262	159.301095725782	112.05396342862	105.785429676296	147.083832900396	138.394333113759	328.663819883213	322.927362499281	164.616663550067	150.093280908105	293.015384236014	254.421285442078	63.772851199077	85.7375742880961	142.871042566524	136.255591726836	371.592273308262	366.518918774333	425.841626749464	417.613925602465	143.266808858551	153.129916749431	50.623885249655	55.5642638297595	532.880809948484	447.360603602443	367.031805228629	336.3463838243	115.858045540696	109.742512447254	459.623194478848	435.972454313012	416.302348685153	488.892182794086	280.74951313156	317.811531947225	100.939513977668	93.6375660468206	445.225909395296	501.748853292644	514.605715985801
BAT2	47.0559068147148	48.8687734028393	50.7452735896894	73.7633095618854	84.7954306326692	102.761846531624	174.26683520819	160.826405622153	70.4121898380915	69.4737273690238	2437.58668381589	2432.82578327259	86.3292759479722	89.3553601425641	137.548483936269	134.298206049693	112.489169007889	109.52231384338	301.264000804505	410.20352984386	2469.72263357912	2383.90409806385	91.8331840658302	89.117787909388	120.253252935187	139.312159102345	62.2463140960934	105.610746018605	1156.01345379768	1354.31610945114	2860.01106224739	2912.89417758085	93.2120931812382	93.8826815572207	200.270073125988	257.708589513639	2370.50593876915	2228.14850653221	97.3263262938755	114.268603123486	99.4965768466629	107.167223249722	278.740331893636	332.27093981149	48.289586223581	40.4110724194936	105.434737476269	119.490496429769	71.8936229982194
BBC1	6.49527673408152	7.70815200491929	6.87389361772198	8.56375694981674	13.8976787277233	16.0029209529085	46.9817022517979	21.8385135273948	12.0234969321607	10.6503388604134	100.185229219307	101.27517628694	10.229638509988	12.1452979681202	31.9242740737611	34.9176236565696	15.683858883775	13.2610281660229	45.3473338823778	53.3115953612603	120.14808380918	117.439906582679	12.0892994633029	14.6847683565537	34.6323099523706	26.178362045775	40.4641640298454	38.7747910735521	75.1788137330361	73.5924450536647	114.433070452433	130.800812614161	32.7040554193561	37.9611522402005	30.5480582166292	41.6366992497165	110.985906294578	87.8544667498718	30.4120189253116	25.3571681294696	26.6168849043117	31.368222814558	44.0109030280768	43.0183550164828	3.77605120836391	3.44661027482996	34.3063770067392	38.0737166522219	27.3376999150778
BBP1	11.5304165024819	9.57370382414648	13.5272309357672	10.2938014659004	8.59099528225116	7.70471325643176	8.28266076370083	10.2935139783414	9.06757421605934	9.29946945231661	8.37644031784024	10.0338233430351	9.28243899599143	12.4545519749701	12.5582065392627	16.1995925478694	12.4412470042405	18.3243585360387	17.0941008046261	17.2973887746749	8.19048997037871	11.2413904452544	10.3604610906796	10.7869303068489	8.41314844826986	16.7309593533267	22.5807687162571	23.4563222444801	13.3057705302721	16.4713888139284	10.8213740415337	11.1676851004396	24.7019526979029	16.098541515532	16.5803850689241	23.5758854648574	13.0136018490723	12.7357606429652	17.1270825210047	22.2068159055264	19.9403364759291	20.9399745547842	21.3829409789649	15.5911013957086	7.68562410999781	6.94994679761618	14.4296240378417	18.6451304882938	20.4465206483975
BCD1	23.2578218973752	20.3642890779889	15.3151362629358	18.6521457573792	16.6126798746112	14.0943563491278	14.6817588645861	18.9096497435825	22.356241951086	25.2757256857581	4.79702548216369	2.13429683693663	16.8195997850923	21.1937398925812	24.8046078641239	27.7580254276857	23.6284416154077	23.236819642539	29.5433030581631	19.9964237838735	1.24443215972791	5.23067152183601	18.8387983316912	18.8021371629504	25.8492946557221	29.1179365886398	24.8735254024371	22.8681078000209	12.6617889497958	21.2062964524677	2.87727085408674	4.75096483474813	28.9663819179307	25.6824862847128	20.4184622699263	31.1733631901282	20.3539229993458	15.1387166050532	22.967444265352	23.6180964724499	23.1355759515764	22.2707959788822	27.7956562776497	31.0912567763352	48.1840144638283	44.7195192798389	23.7873877342566	28.843759201337	28.0885100165615
BCH1	20.9752439632139	17.7928193735538	19.2186273894918	15.6842748202561	14.5527480317061	20.5839914545819	51.6674043625605	37.5908758644304	24.1372485104184	20.1703808843793	81.7049705000034	65.5590150028987	17.8039411220138	20.4946382360469	43.8484448091154	43.1221421730332	23.0103302025448	21.660235838803	40.0739550516963	40.0386952365714	80.1310787483531	72.7691409408727	20.3808423090319	20.5929186724455	42.9806631357563	50.4260111806334	34.3475998796988	42.5720499821943	43.7230604260109	54.544922291629	66.449447938192	67.2920969004386	34.6400523220399	40.5806600551298	26.1858007445324	39.7822987704382	77.433236157428	62.3645397294672	34.2383564612244	30.0938144623185	35.9713849338435	37.2517715280813	47.1457439536954	44.0177526486225	14.878934445379	10.5956141873549	32.4744688468183	40.1977533032065	30.9244904976193
BCH2	5.79613896329502	4.88473276684518	5.96363800106992	7.81567529288177	6.58208471783037	8.28343911075228	10.4811587610527	11.0837184877583	9.20040912157274	9.88500989651819	12.9154196567236	10.0561016226124	11.7463090735401	10.0506401299492	15.5283458286131	19.2695432294497	10.1208561680087	9.63203761389001	14.6012547608887	14.7320761328812	8.79503585055417	8.96191392251101	7.30803365055053	9.82812143061274	16.6082067117105	19.7476434074369	11.0215784018178	12.0213814107476	11.8040296277516	9.87323254173598	12.3243621195362	10.6837236404481	10.3874902671196	14.0564264816125	10.3360826476103	13.0623429827545	11.8568268766896	6.4844208643269	8.48083539273719	12.7177953417268	12.6624889467387	12.633201718467	10.2822735251702	9.47019134608173	6.0810852635691	5.85727952837577	12.1609960565571	10.0382639743273	10.4788242418669
BCK1	3.3151650732051	5.17783288023237	3.44169998591344	4.55350321202124	3.60795193421405	2.77801730759012	4.9773174535188	3.37402710350326	5.57286448532771	5.82122486629391	4.64646321294141	4.29612460697344	6.50781751173534	4.33024665192362	6.06429046423595	5.88151142854809	6.0077941483669	5.00292418815087	7.94506364693891	9.32125010985152	4.48248079585768	5.38315185709667	4.74477304285126	5.06425338839291	6.95165525143889	8.05479809119026	6.36074380561089	8.14908790922063	7.57503658626096	8.79118988832604	1.82894742890075	3.77494928086725	7.85031116079292	6.95330448912129	9.43931135740027	10.6256823747269	6.90027630245997	6.07765413244644	8.22261021252876	6.29110500663104	6.12756881895964	6.12170509437733	8.56646101313564	6.88051394858901	3.73736688009002	3.99375358340456	5.85306979346919	7.63938945730944	6.91143339820839
BCK2	13.8683142496625	13.0466260508516	9.91092943205317	11.9064132384964	10.1362970267556	10.9996426475827	16.7964896043355	15.1813032801991	11.0329383485084	11.3151047951613	30.8372404512482	27.2657901953578	12.1309843319856	12.9891574315453	8.36770652904145	12.7755130308605	11.3533768410461	13.4348202013593	25.3490039720843	32.9424127753448	25.3889484985446	26.5009239884955	13.5548987453732	13.2464847338607	11.753214566613	6.16890721748724	28.1292185290895	30.9187460660947	33.7996713452987	31.6444857922564	15.3613148227972	24.2322995523095	25.9457779468191	30.4700001447113	27.2527428306489	32.5623464679934	34.1522770456014	37.6769415140268	26.2756238937944	29.3360009444635	21.0763632816965	24.7900382063164	30.3538880977071	31.0904262191199	11.9763946103359	10.8523053664719	24.8727061030688	25.0924753878153	19.0041550882876
BCP1	50.3434983800473	68.7858053826087	54.6091178889621	42.0991211598829	28.7467788370192	22.6874724319143	85.3622526838396	108.841967755926	49.1533447158383	65.4159258813701	10.4353587808389	7.38641066064516	54.1603611773887	54.4868845507402	126.785763723591	115.279045319346	69.3442815767414	48.7699513428249	56.6276478346398	71.9722128049343	6.89082143415779	9.30982035609779	60.0311346026618	54.7038247593953	112.856895487869	126.52495375237	64.1170582514993	97.8488933724281	34.0251511240022	24.2509813611883	3.98309856110108	0.822110820310201	70.8729275959995	63.2052630945352	47.5380844348097	68.4841256016192	23.6682834973064	16.5449415885696	66.8780082231378	73.7980096007126	63.1650031562697	69.1592697959148	54.2195105002388	59.3003020388248	85.1647639094857	97.2087188971808	81.7925496142184	87.3453276872442	76.5133742886928
BCS1	14.6260549816751	16.2783720716629	9.27444792917918	11.8430404426877	13.7263967410901	18.6430228362411	27.0830072458764	16.0641663296073	11.1185972058778	12.1068516639911	41.611081519367	36.9100888022341	10.117382747109	12.7991106586347	13.9322163473877	22.8066276800931	11.9863560991058	17.2840038588283	36.2445181951913	40.5756182721464	29.6511267907981	29.8655446050512	16.392171996534	15.6762846719434	9.93404954858114	13.6769642453881	32.3030827163678	38.3492994026305	42.9354517371116	46.7723012408781	33.1726793662751	39.2553114503222	34.6903823643285	40.0281907035161	42.8015415778898	40.1074189493255	48.8102009066172	46.5432659419591	43.2196683871044	35.2691064498164	35.0707020767783	33.7726105987912	44.670423246856	42.4838321228832	10.2507140683636	15.9077132531061	35.3870011842384	40.875379624674	29.2499311716044
BCY1	26.8087565083524	29.3100113387191	23.0606825920895	34.3909095725181	38.7832288946098	57.5662096732972	149.259953725571	109.991065024139	43.1879555764112	38.2870519026694	383.962711133082	380.325375586278	41.9757951992163	42.1503888829999	103.800770783457	89.3829988800886	35.2225768500888	47.8419299428289	155.755578560405	161.034390657039	461.099471143681	451.32126545916	36.2376901925376	38.7685804144285	85.1751633146569	84.5385566298632	91.1167789387299	124.673316861911	270.551714473242	314.381294955885	447.39892600542	464.515190027908	114.268964695429	102.068089624888	103.366474361795	146.306523634214	363.39842916602	360.417868112105	104.489761593813	112.154556682065	90.8446394496513	97.4615243445942	117.98286742355	146.796241773663	36.8572026380811	42.7446508983515	97.9507029169275	104.249022220327	71.4156657008695
BDF1	25.3266496035427	22.6228781328488	19.0535766480116	27.6147399402361	38.7157929834983	31.5051578917464	34.0384141407733	20.67040832652	27.5246770283813	29.0167945567709	85.3970370745115	106.695387574524	28.2571224813049	27.6023875429038	17.5102597143994	18.0304426307531	36.0640021131188	32.4032676920454	51.3154717074759	47.9054527022504	138.545370790669	150.141998434948	33.8215625181878	24.9356397659768	19.6883571303257	25.7841329632979	68.3558803169322	61.7536473309989	83.1017087705719	80.1602587172415	196.299731118568	216.85215377668	61.4945493338748	55.1322320007449	58.2765789379903	49.4257798307395	92.8044923705316	77.353793709684	59.6749137658304	44.3268572008355	45.3190871799965	46.8069371314527	42.1069505964887	41.3806741643389	29.9223785537971	22.6707480451294	53.3702880753143	59.6448780858655	62.582753502211
BDF2	40.2980522800593	42.0119413622748	37.1796174375636	36.7302263560714	18.4844446151553	22.9979312702516	148.625003454329	130.27987781268	42.4625961507232	35.4841008994081	120.206205831908	109.518767287716	39.8225658224944	42.6055803966177	108.39931724377	102.241939379669	32.1672642793682	35.5197705598958	74.3710645040063	75.8051765157987	151.496304061313	134.594098869626	37.9677960419736	40.5479438497221	133.267159046307	116.465601004517	57.0363290168033	55.5156650771227	102.177261095087	98.4859992073732	185.684633858599	179.110643837451	40.5631289229678	62.0083846295356	62.2041186483572	74.8710910546059	112.117164661856	111.809462993867	65.1060150389856	81.2665918338625	42.0625270101455	51.3723094281012	84.6782740898786	75.2484837116228	39.4213052346651	42.5736379449539	51.428279791869	58.9954577609949	55.0339431907543
BDH1	22.0763081934293	19.7163755967301	21.585420817212	25.7872512327478	94.6125832893973	102.670918376379	73.39563353549	65.183250718343	24.9653210456217	27.4687787106741	663.485703378216	740.454706289261	22.9065412154419	28.7386974832196	65.2000227561833	59.0558378154995	35.4364131893735	27.7483661480077	300.378488435717	349.243384806313	666.206097632907	700.060454162605	24.6296358315847	27.8291935059876	68.8901493111629	73.7032315076178	182.366571953615	207.197769384872	705.558931677575	838.418728260702	418.542195456729	464.490243560898	169.445544283413	188.92845648626	288.074928040021	290.751378462776	803.706437789421	735.121004447893	197.709712635014	213.934666371323	171.412436868423	192.540435502456	316.603858739619	375.12769212407	14.7009308379878	12.2782638780296	211.222606162679	201.916266121868	189.211282265398
BDH2	1.44496042795502	0.769170186513032	2.69716144397323	1.2761327649178	9.85063537073338	10.0259295201608	98.3221649474204	73.9379842819938	1.8723852356845	1.87758767743286	272.021875092538	339.652140206992	1.56178874517085	1.61652835523232	20.2504944435619	25.7957032630227	3.23159427313362	1.65157401440743	48.7293445095416	71.8286307238039	261.416322319518	254.019304116331	1.21457549930052	2.20650065443754	5.63224146763049	14.3971895158247	17.414106695506	10.6587555691148	104.44499271264	150.206535879968	211.593838343684	240.206038332638	13.5930651579798	11.8665432040734	32.4692994925502	26.0165772454957	138.653767740225	111.791325956247	15.5087134894978	6.79597053570223	10.421189444835	12.23826823561	18.8780007480142	24.5997402321116	1.47184754973424	0.930602439817641	13.7657160255426	10.5262390888382	6.95500742310874
BDP1	16.3136425306493	16.6366924478638	11.3216679389991	17.4831687935145	11.074231226106	14.5046334521558	42.7575050872751	42.3474570609214	16.1650500835707	18.0804592960348	47.042995900957	41.1688800330933	15.3505881031175	15.4592187891962	33.5572338102721	41.8135270248156	21.1800747650417	19.7743992830897	32.554643835755	39.9328881836525	57.8922854084115	50.4477312591183	16.5358457744153	15.910102083055	28.766110071776	37.1688328702794	35.5220767786353	30.6652604083347	43.1005120503936	38.7082716360487	49.7870680877599	51.2121031952179	33.2491906863102	34.8071753282214	27.3803285684361	28.4507336402349	47.1132467327096	48.8195985117701	28.7561389407924	27.1813331386338	27.3448103010248	28.0016076964447	29.3882209488	30.9661985899081	22.9428700196418	15.3062972540128	35.2618583112789	26.5913738924511	33.9270775444725
BDS1	4.80388764507829	5.04749327570812	7.42903804411898	4.8157520058275	4.28918532619014	4.40063313373389	13.1408846354353	11.3062303560584	6.11162381448375	6.99874088538627	12.3853278558885	13.225139825697	5.66426637840492	6.64450130627237	6.89686365170458	13.3449918350355	4.63642794090204	6.58003428001546	12.3216741030624	7.84746940070309	15.1009106113289	12.3473705916913	5.87343473885927	7.73422661140383	13.861289083928	7.51786032439696	8.85798960163933	8.05122955522183	9.99963709110139	6.66541461470354	10.0287947920363	10.7330677521937	8.69619781632735	6.63090608353301	13.4190940104201	8.39852058570795	13.032656024163	9.46296579143635	7.77022040769687	10.1050660622119	9.29181977865238	14.60818394621	9.78610233200655	8.56251096072393	3.5544264637895	4.00771432522425	12.2832050599459	8.84343293703679	8.42179856119039
BEM1	11.7550035880908	10.8186160902006	10.8941707486789	12.0230888398597	12.0581682175325	15.5908774111959	30.2315293836119	22.1327875259142	13.8102620701397	11.0880124200506	34.2896183722684	32.3016227155868	12.8746787610588	13.5597293477932	21.8054232065755	30.1553515264282	12.8446039439521	12.9651372848648	28.7788526237689	28.1637792717646	46.5082994467439	45.698100509494	12.2961358356874	12.4022222030007	20.8813148491826	16.9879422848585	31.2604446688175	33.3898616735374	30.8265532471413	43.8561574487435	41.3245155833084	46.5906703957718	23.3032904399077	26.8824109466386	28.0930917427937	30.5599530912055	42.7494408989792	48.23525002932	27.8864466689684	28.3458484077515	26.5984605672918	20.8221293837337	35.1212771077394	31.5835399029822	15.1482563591079	17.8077726683225	23.2265385585124	32.2948424986597	17.3513073871367
BEM2	10.715899523283	9.27729854463605	7.33384123642363	7.8507814493811	10.5836480417451	9.33273264747001	16.7212653140188	16.2941089448008	11.4203965608177	9.85639049950574	12.4877852744081	12.6096945079091	10.3068281852023	11.5301564150459	16.9773819169737	19.6225710424957	10.6297688851732	8.53703668599938	12.2942525570918	12.0703847894187	13.9073374658198	14.1486071528577	7.99532295227704	11.6597942698836	19.1078444510577	21.6480197490968	21.9793207309426	25.0090475472042	13.3604005667949	17.0640324124028	13.2103213967872	15.5564671485516	19.9476337138153	23.1564690227183	13.2130026615112	17.3660472932484	12.1702214208403	13.3849994155689	22.3245252586555	12.1045700181466	18.2982732991871	18.594981576263	16.9076840944114	16.2297405688051	6.43096577191024	7.9975667523031	19.9911738821533	20.4033421874489	15.0922932334792
BEM3	5.60038433712677	5.27923335847143	4.96940218612197	7.54100936823607	8.19202561279165	7.85071954902541	13.5143739295306	10.3764017019757	7.90536569197705	8.25768388710284	12.9378523035639	15.3358656152837	7.10919953135989	7.89158794238013	9.40892379558755	12.4068707185701	9.98713441290206	9.6103720859317	12.0069250481117	11.2692830492059	14.7277219293142	15.5813485400101	8.31322198038083	7.00428543923622	15.968531009026	12.7632092212376	14.9845965816322	16.6954038680871	12.1727669768633	10.3922438580338	15.6072255711259	13.8893945441502	16.7040708611002	14.4737554605006	14.1223687368149	12.9852009977959	13.3060767744169	15.2671537010923	17.4069549912775	10.6482751221729	10.3220824512979	15.4344118663043	14.2405725525217	15.9644368640129	6.90993750398738	6.45680628824215	16.6490696965054	16.7632900863131	13.0211952033539
BEM4	6.92460390410902	6.45428299097393	5.88363359105623	8.13920212261927	7.02031358825478	5.54056524558414	11.8916257490407	12.6173671711689	3.70489785133557	9.09450489501438	26.4255294239513	22.5481919166402	5.40809297080932	6.39731102223375	11.0868628797155	16.6852435115494	5.49180291526207	5.54333438147555	13.2049113217485	15.6330074745667	22.0213472507028	23.2883385452453	6.00834180211887	7.07020653758185	12.0790030035059	14.5266320476686	6.79605774400046	20.3159264503834	14.5571494277586	11.2019333811567	14.4388242377969	19.7632896662937	12.8102246276052	10.5516384545336	7.84417900134776	13.961050161441	13.3320597404498	18.0980094025994	8.36703564395079	13.9017264298806	5.77103680105515	12.4001348218481	21.3565601702137	9.12414561485349	2.04528701906348	3.90454223497509	13.3759914603926	14.2840057322229	11.4869573046998
BER1	31.7640886214688	39.4185213179373	34.8607777914147	35.7295368483803	24.5974576815103	22.7271159492806	45.2442012404688	58.944297097391	27.2284978247168	25.9284963111072	53.4557761587133	58.5780062748435	26.4091645702031	33.3483891402163	78.5526975092755	73.2815474636883	27.9882150902076	33.5663644561236	63.1934915405774	49.6830358405718	83.5890712906126	77.7172397288503	34.9150253268744	30.842862011798	54.5739710207014	61.924156200301	58.2323873160477	42.0429053236231	47.3397289769607	50.611205589992	71.6964446745096	50.6138869163213	51.5737606796969	65.9540404299322	44.2425996122587	51.883390320668	71.74030167663	75.9632874921054	50.3377710668816	48.7386953208143	29.7066884156898	58.2551809946197	63.877477475454	52.8966465828833	32.3158447809007	28.8290545355187	52.0965619369825	62.4984605641501	54.9721253699614
BET1	30.3567782509957	38.9840559695231	37.0181426844266	29.1085813515914	36.4399616732363	33.9880177741302	15.6143276447856	35.7231309477678	33.216755165885	37.9842056206737	65.5939592378089	55.327950440958	33.5400071012107	18.1124501326683	34.2434875410191	57.2611713318265	28.2704375939532	34.3786024678402	95.1659364396116	76.5600608479223	57.0749923024553	47.6821626125329	32.6047847779251	24.1482426194405	51.5462739117543	45.1609093729424	99.2007227718988	95.3483315654135	83.1725368900773	58.8346500816617	22.9502686431676	52.1061845728516	34.925790184205	59.7492142182753	55.5223310013244	91.8930227949985	51.952207729893	73.0868876739066	60.0131182467348	45.7512081934229	53.8239111684368	62.4143914617483	80.6216358870484	60.6211846388243	34.3156321436985	36.8492430873961	76.5067835095489	75.491416415853	75.886149570404
BET2	16.1726399550285	16.9927168689713	11.8328787943225	20.6768699882624	17.809118399889	20.5130732850932	39.7022629166603	35.7563024587616	20.8292219326415	13.5851818185458	64.3309176607009	69.2584645270747	15.6790801271832	18.8602935353511	30.958310715728	46.5908631430102	18.6210579751234	16.071172866603	52.6752930002361	44.4953474637968	53.3622100718953	57.1562600957037	21.421071091582	16.9892225884391	33.4144234430178	27.1841997753215	29.8209545844165	34.9354915064852	41.433218117238	51.2906941164077	35.0131566764162	45.4251714570708	33.5702984932684	41.3395507875418	35.4956060830102	36.1280407988714	49.0649672197193	46.1706505801761	27.5357385370599	36.7566402054684	41.7087141055925	36.2742232725865	35.1419460003101	36.0328349056661	19.445077614981	12.8497219408104	38.2396292393339	36.562023088646	34.6530600008573
BET3	49.1793384594806	50.2670352849016	63.8873639175617	47.157082931292	46.329516451584	55.2350897697294	60.4006258387351	59.0543214160338	37.4551244207924	38.2548762492235	104.095837338964	88.6487260025604	43.3917234114669	44.9126129858642	113.2163868504	84.0565528717975	66.1755350476468	61.3783529912262	93.0434608835907	123.397398437626	98.9456989975035	106.412255703963	46.400213654289	45.3823452173049	82.5892298408231	86.3875266306929	105.85783689659	120.888475025377	74.2463461423311	94.0992680230574	64.8760995606066	59.1999619317776	75.1456382985695	91.43409308255	72.6933719559404	110.982457457679	79.2267270435963	62.4064564386348	105.264767627416	80.0804913804533	88.4682281429349	100.002593638439	83.9639901386472	104.950989498361	39.8225791896005	47.3681345336787	100.167641450685	77.0165874415124	92.4734288992533
BET4	12.6440455630529	21.5458481216349	19.7476293421003	15.3883332019159	17.6721032657625	19.6013592597028	51.7786938282838	53.7940915848001	23.1895747263993	21.0635092858212	76.4458324929308	56.4532232046221	20.6044124293786	25.2437646639028	55.9546726407453	67.1468509336092	22.2820723428952	21.1196794543315	39.2025126901198	45.9927298626761	70.1249726686236	62.7319754124425	15.1246687779934	19.0574689256978	52.5943605848612	58.601277641701	37.482618790273	45.4253157660081	53.9627124577317	58.3184273639675	43.0161153036493	58.0519255199835	38.7348981511717	33.6376018647602	34.1551933716766	47.5403515380337	44.942336609166	47.6480130556933	39.1642441352175	50.4425690265645	26.6064303822876	41.5328672723026	49.4014208733878	34.9610601447593	17.3164521981348	11.4757788469288	42.3577152548802	35.2441888847448	38.5545183687518
BET5	23.3705597760272	31.7777846098219	52.8066864973434	40.8644747357657	47.2566295396165	33.0332721440603	57.2762087222061	29.1197012443863	48.4531790717295	55.9715248672597	53.468631543722	52.0391115738929	45.1704901472241	40.602104727009	46.522667337828	56.0115109275512	55.3071994432301	49.9555615435128	75.7277724334685	83.2104377559043	60.6843377097863	58.3021193339592	41.6001733412475	40.4047960721712	80.8035644155204	55.2193842136469	94.8053821349257	118.274385701941	41.163270597419	53.9539385732758	53.7850944421508	63.7117799551824	70.0795081395387	74.2164342017343	54.3108595203441	72.7034196007807	52.9360960436721	41.4446759699575	90.114969512116	72.394430280446	56.4098817282806	70.4452827711806	49.2889491217925	60.6461013552851	43.3570811989714	50.4632972411534	69.848499876641	93.7701532830311	79.5323958293666
BFA1	3.24182497303538	3.84289899030242	1.36841079896058	2.63028650194345	2.44917035356355	3.09268664075942	3.46319425652301	1.1738157914432	3.10204664926092	2.5922399871507	5.25359733613385	5.03447072116749	3.44998270855901	1.56227367014522	3.37558622451433	5.64454138392479	5.29490762667977	3.31523511283371	7.03584181918899	3.77347882549302	4.03620623892432	3.52523752310831	4.61147673137457	3.94651954340622	6.44921033651349	6.2007069653253	7.08121000846525	7.96874471907179	7.90601946819284	4.89348594579865	3.39351828404885	3.1519062780024	7.54779661786493	7.57262401691517	5.4731739962128	6.39417270098757	7.68189721912143	3.75893463397407	3.73632226511571	7.56083449063734	7.20063408625954	7.09909594314321	5.21545055866542	6.51904358336123	5.07402688000949	2.8333190577389	6.78758726634946	4.25237244177301	4.80893392545595
BFR1	88.9209835171147	90.7505265422443	89.1611612830446	104.169127753207	80.829258093113	94.5128674542289	172.538385124364	174.908697331431	99.5655479464106	105.948499703478	97.3075512851025	85.7694937011322	98.2763778123622	109.57052460037	191.479085934251	186.235934161545	108.172755145376	97.1636066737421	167.946192043097	172.119790045261	114.686273310642	103.233057407351	92.2596372017947	102.133548799039	243.70953710501	202.214694047479	197.31382843917	223.60190421864	102.646574373896	107.448687909822	105.627523998237	108.130960183613	193.141270137981	203.140903635892	167.905428955314	186.267049096742	102.084408623666	97.3206569035518	179.774960357739	165.272549644026	166.49318576537	171.603766488979	179.023230243578	156.654955919987	89.1947189976002	84.7937182631563	192.561061969949	184.482003144736	182.029358207428
BFR2	34.6537527500003	38.0702153818599	27.3356544952915	31.6712550618298	17.0173998930802	22.2441542380793	13.7861326456224	29.9475521344731	29.1874112416625	40.8071958466953	10.529781583728	4.09929757580083	31.8367971289297	30.0452294838744	44.5876904028444	53.927075371361	39.3316701620486	39.831532244124	52.3783859118776	43.0155276799914	1.19507554527259	0.956801429010496	32.9974385322156	34.2767212728909	52.1942265605956	53.8547263232957	54.9129115360099	60.5598345411283	27.1803216550067	25.9730073941294	0	1.5208463933764	38.815201817371	42.9334871755207	37.4346946777186	50.328884652274	13.552315344821	20.9147585192905	43.6060146784828	40.6105175817492	35.7956739538164	38.150721356936	42.0620796673182	44.6766218224646	69.684956527423	65.3060929596379	48.635502676015	46.1663355306539	37.7063075057261
BGL2	342.832260237978	369.800151667044	274.715864745485	299.656662363629	537.623653053707	658.563091266311	428.289427650651	348.394468213547	344.731219879355	316.125795106521	621.385603013116	557.752731925836	358.656608868912	357.428921593868	546.171288826619	516.559664748445	360.148375254162	328.450573377272	886.685867262295	821.517509946077	525.623522224547	511.347645432869	343.906067955893	352.874739497433	687.598731172159	655.742990349645	1003.95712684989	1082.77460076215	762.264540050237	915.60315389665	461.64013088116	454.758626780348	1075.07534916634	1172.35934901371	1095.39048634818	1054.34708848185	749.122222223385	761.21146893618	1133.98750639656	1163.06179439654	1120.93103853994	1150.83207647043	996.658710616353	1067.37874021692	459.644758121446	463.148223257367	1106.15951138057	1069.30297904885	1070.48864840835
BIG1	5.16145457572734	7.25476394969266	8.23570105435689	8.12824879988692	8.31714797964848	12.765328423982	15.2754258236475	12.6400288965013	5.36829651599914	9.77473772282227	34.306651757405	23.6754728632521	5.94507184442318	5.90566390509164	16.9789753149156	22.2774863322996	13.6746858111447	6.96706072209947	23.3707010857078	22.2244109698268	21.4233550485084	22.4371517901024	4.89235487423859	8.51878330105746	14.3736271534313	13.4914332012532	20.9655291095464	20.9026626719725	28.150790071568	33.8075751710036	5.58848939944244	9.88004825925824	14.1487793510201	16.6739958075887	16.5564380335891	15.7982876179375	28.0278254596879	37.13659214136	15.2909736991045	17.2624528494696	16.4607152487224	13.3824052792104	22.3536723009804	16.8642862813402	8.17441882595601	6.16115261701687	22.9844143043082	17.0410281657062	15.1058629990191
BIK1	14.2365946113023	14.3649079587866	9.67233771290631	15.2763518817236	12.3177703373616	13.6625055277377	19.614514353614	19.146612567167	11.946974281298	14.6816659946177	21.9727454415514	18.8190589382669	13.4823710158748	13.6515732992134	15.2946626390201	23.0177737451967	12.1217660358384	17.1242169353571	26.8694628365456	19.875827160366	28.9281200897579	20.9641603428354	17.9501650571022	12.5170497817316	28.6898544199055	27.8790145110593	30.9387535978908	35.8283972489237	34.0308173735626	25.8675718088305	19.0276569199796	34.274799204736	25.919010058086	30.8801844071725	26.7826128256289	34.7661763185688	26.757325043669	28.1020634830501	33.0117868552343	34.0775825832685	23.6966509272873	24.1243126808096	23.2933708412731	28.2452931523885	19.6566768399242	18.9601840611674	23.3732320370454	28.1784730033806	26.873211866486
BIL1	91.5314566214389	88.1583680116943	73.0581081847881	63.8311191745776	73.5519300420834	83.8476319202661	250.380979468629	215.424331594649	51.754948732323	64.8737378965484	121.363190482694	167.990779156346	64.7549139461438	119.154579042277	150.182763845843	131.843927065886	83.6911598472218	51.6244796755786	145.335391091578	251.82818073222	183.655696531477	117.630955255113	69.9438595092291	50.1669682811029	176.071704440171	111.410806731608	135.021039545384	163.632767536392	131.904746696513	54.4288634735545	70.7721525455655	81.8014610427181	159.066442356675	112.304419004862	127.841022220443	240.032508399607	96.1236497237598	141.107496172462	140.258465790048	172.620189764185	151.750903273556	106.597935580132	223.752833652922	149.551318708043	42.3279464186482	58.1799807380053	75.4964655155794	53.2101576444983	124.806159509569
BIM1	28.2955536248862	34.5089619597542	29.8848233285148	30.2288993149308	22.4664828903877	38.3218737339805	35.0112964909216	49.0486770355743	33.4003098602481	37.2695674230846	28.5362550885351	25.3420136870692	34.9905309011336	33.3032152668674	55.0204861902391	59.7765070113972	30.8030950567297	34.2011264156041	48.3456823554377	41.4330436270172	18.4523749728211	36.1287260023038	30.8826006585689	30.9685733213564	63.9714883494748	62.0290173319756	79.0002115678226	58.8651407139625	28.6507134159374	42.8835340929233	25.3000824605308	28.1711471214316	69.5564390163906	76.1089532738785	47.4138309495809	59.7943222556043	26.5588551569715	30.6018846608747	72.0403085407859	57.933983829028	65.7481608402325	73.7356080946779	40.3858383684104	51.115279332482	22.5971414941782	20.5521257333757	65.7746886200701	64.1095006520297	63.8799225710439
BIO2	31.1987946820927	30.4446168391944	42.8005824687026	39.3630619031669	22.5780657991222	25.4557135149151	53.2097562941607	34.7817661617677	37.8737287916475	28.0931275088127	10.6441945103058	9.32361689239728	35.49590324585	36.0050157174816	50.0117535740264	37.168013313704	26.6079637162904	25.8322387866739	55.1537098025348	48.9184150411441	5.4362882507019	5.80320544144804	24.844393934049	26.9149319931386	59.8393821527445	45.5412382588952	59.1175452445193	57.517711003434	15.1839474905462	14.3210473145121	6.28468604794651	5.7651285259805	61.4715748984352	72.7182591680351	43.2473856744333	55.9195713579088	10.2747307372454	14.6963072355376	72.2705519821834	63.542877696956	58.6442428030114	64.8599673400486	74.8172691044535	57.682317257788	18.3761951936957	17.5803033582869	67.7867897147127	57.7517780320176	49.2576960675451
BIO3	1.83680293217716	1.76911413622815	2.35184535222344	1.46773010329328	3.00667453142012	4.03393783759876	2.12575347645821	3.60251230701322	3.1734751728592	2.38672223440326	6.44941810503119	3.86277755355033	2.11764297141869	3.56177288797258	3.4532985184234	0.692938445797211	1.71056632194672	3.25591074545526	4.52432757013802	6.36955993643203	4.50449744424493	5.4095895309907	2.57325254990663	5.76767425521072	2.87899124139783	4.09884117846813	4.34653141553411	3.01004610141374	2.69601385878488	5.33988082655406	3.64522399873011	4.29928909236086	8.29051202959965	4.64817527405462	7.39093617454745	6.86844626646946	4.12582185176603	5.19137771298428	5.16015211329059	4.39667968025646	5.11769949645069	7.8435248331094	5.48795606906224	4.00147634981639	4.67176556329224	3.47823663020004	10.5546224519954	6.52542319252036	2.62380965808277
BIO4	3.7191404145977	7.88057570939446	2.44904115961374	5.70594923950418	8.0359820510337	8.07181396472404	5.16503184279889	7.00255523541349	6.16857283504253	1.93304552081528	4.82170139368795	1.87711763261049	8.36117233451403	7.98852474449002	1.6781257393154	5.05099022674794	3.32500698976849	3.29625950197683	7.99487745970646	8.44170202230864	3.28343594750601	5.25757290610003	8.75330049208262	6.16615379550904	5.24640843909142	9.95917378763964	16.5958297402659	7.31365547197048	13.1012312390746	19.461828840288	1.26528436319558	4.17847834192547	11.8493055081139	13.8036475221373	8.16271975438874	8.34428299058266	7.16050570072793	4.204581800576	6.96547000606607	3.56094256242628	11.3042918276446	19.0578098281936	6.66716055451925	7.29193639776917	7.56746981676857	8.45125405808126	9.44818022227439	7.9275341846404	14.3441970851035
BIO5	0	0.246502064801847	0.28088388935981	0	0.502726875951022	0.793519006776711	1.18478026357745	0.602354406874347	0.530614262627893	0.886820279911115	0.829519428458505	9.68803934170838	0.221298841104346	0.229055419608281	0.577406441053338	0	0	0.453666214449191	0.343856606891889	0.484099003057413	0	0	0.430258206979485	0.57862637799575	0	0	0.519112272174373	1.25822782965679	1.80313610739989	0	0	1.79714348339089	1.63082694245035	1.72709396343248	1.68516530187212	1.64062006633002	1.47825754749839	0.96446720387093	0.479331592405166	0.408412295766648	1.16686530167509	0.728593773036971	0.764672473660779	0.836329588006828	1.04151477804965	1.34209837189962	0.92883110022149	0	0.548389406341068
BIR1	7.98185168269157	7.13857852986413	3.91070973656556	5.46689423277404	5.87947048271893	6.62883626540998	8.90759036520818	8.38648052699928	5.31912711370823	8.64294500073205	20.3266776681082	14.028099226237	7.02492467979025	8.67436197069704	6.75286600341262	6.77514123146123	6.37137515959379	7.07427730917525	16.0858500750522	19.1417098502772	13.2127094269805	17.3786899340687	6.2300182155196	5.90781283586613	5.36174694914594	4.63464254322979	17.3460504975052	11.2116109225219	12.0502651249537	16.7818527917982	11.1529081700802	10.4088634669334	14.0775586011573	8.41614363847667	12.5132296242456	15.0757304666624	18.1117928996761	18.2621831801725	13.0803612508739	12.5097532137305	10.6141058490003	11.9700471695325	14.0532570332416	14.6714965817588	8.700505436906	6.97602811317739	12.1560351498285	12.760256379779	10.994575849165
BIT2	2.64500787380845	3.05705159151867	3.77373383524563	3.04350943534639	2.59777505473919	3.69037999243195	2.44888082394861	6.22515952727144	3.83864637749964	5.26992044632911	12.0019802749281	16.0198401761656	4.34542722339783	4.49773526132751	8.35427646067404	4.78963253634957	7.09409459882143	3.51639413085426	13.1485714205294	19.011561629098	11.2865463720627	11.6847593870086	3.77961585569105	3.78731334130101	8.084274522573	6.57693895124987	7.51086150023937	6.50175634281188	16.305556955165	17.8780376238408	6.74893391368632	5.20044029874513	3.79219237101275	8.47834144116961	12.7715639158076	10.5970976962149	26.4809062588728	27.4106393044251	6.43993108875193	8.01960100803052	8.03952743647426	6.40036747347308	21.3373045352547	12.1005660471271	7.26556496423832	6.70395312892699	8.63928571010153	7.32935096245876	6.2342015809855
BIT61	5.84348541638338	4.09318332574194	3.78959256615895	3.3109825098107	3.3912944663059	5.14705483105517	5.53311828731342	9.37698677173646	5.23147490219189	5.29204826413756	12.9132985181972	8.04358853031727	6.43071086593139	7.13154471657637	5.99240545422867	6.01218276677649	5.0460933487947	6.12070169671563	9.9921000153552	7.53608731660345	6.25319802832332	7.04035997734602	4.24203364621798	6.60558091225413	6.24478445924488	5.08044867070496	8.08116602916894	9.14067981046523	9.35664094533123	12.1618088576461	5.87363377143613	8.20648957343423	5.92377117688309	13.4430885768737	8.16153369839337	8.5132868483661	6.64804166297137	11.0103237973263	4.97459132252989	8.47717437453322	8.0732819470451	9.82989281424417	11.9038688630935	13.0193403038615	5.40451459027615	4.87499780825093	6.74768664018846	8.49250712050642	7.39863823948177
BLI1	18.4480838303042	23.3614439948772	74.5073829636312	13.6798419983056	49.2825820474655	32.0715765912965	83.864693607738	116.348253733782	37.9924994762353	18.9639067771855	193.822568084417	600.874695387112	52.5338150273894	21.482996547853	92.1193428431367	114.571888670871	24.7725252650235	13.2783371978061	107.745121610839	90.5010798239487	186.709957779244	229.953354194647	23.3314491118682	57.4646926026507	65.9271005390616	37.1679549631305	66.7458223830677	33.0778975190373	159.866456483836	126.667443905161	179.615932912359	151.258911279613	54.4371233403463	53.7457139307403	32.1856061942302	83.9632176428396	143.900994419074	156.419186377045	37.2702990421529	47.6122524119295	33.0005660722275	51.1351499565303	83.0453726910619	116.548534500556	13.3777394654516	27.7269165345694	69.6292598050879	60.9579354677625	99.0854228045478
BLM10	5.72437872391657	6.56918166673922	5.6809350219877	5.95615947353317	5.98099028068675	5.38115139379358	15.3640879706137	14.3325970341904	9.09044241780049	7.70197648298228	21.4154645014228	21.5152955685755	8.7936448568875	7.52130604675762	13.7389144142079	20.4007936811213	6.53326289235415	7.1244793489923	16.8545514477956	24.3046256963164	9.76702048772315	10.4381822563926	6.5521157605657	8.21491066128589	21.1900106576215	16.8896166841813	15.0693196036331	13.6220602633769	23.0610814039147	23.1036058262078	4.76510875279482	5.81562017520848	11.1562255627126	13.5613364030085	13.2320925151509	15.8101368222779	20.8699846785531	20.3096532048969	14.2566959241954	11.7586104940361	10.5505817353566	10.9219282305725	13.8280779871156	18.2083651578543	8.98352383073709	10.9108717825063	14.5865593883305	12.2018231407046	10.0473559560889
BLS1	6.88520612562673	6.63147521756585	10.0752694180863	8.80281195654688	9.01633814330426	14.2317041963654	15.9366514915692	32.4094694256572	9.51652186670653	3.9762616079998	63.2285041192771	34.7509155990314	5.95345781487494	12.3242670714516	20.7113506540139	20.7797956131028	12.8240495922258	2.03411238828415	33.9186561944932	17.3644964512205	54.032045423278	32.4443925426564	5.78745756172613	8.64798190421438	0	8.77965676046831	32.5857776926787	22.5661955610373	32.3390107520913	25.020568180583	39.0401078196826	29.0084503401508	18.2804377057748	7.74382028416708	30.2232483104698	22.0682269084691	39.7685950880972	30.2707829629788	8.59678334588112	21.9744768866693	13.9517237254861	6.53363850395758	27.4286214987524	22.4992017089506	0	6.01759497134557	16.6584580791315	24.4602857423173	24.5882141247392
BMH1	376.177197063711	378.146326885128	367.749310548736	381.322011896714	674.340814549704	703.230823580016	1334.60082066978	1226.10608049371	430.589412663461	470.453212191736	1359.6112292936	1354.56960287418	435.699598791544	470.775061264841	1141.08689697862	1129.1134673199	505.879913682145	467.887689211574	1111.90177844787	1213.80470748613	1523.7919577423	1545.08295278719	496.357122765631	489.323538538959	1116.31025888436	1176.63456536576	1109.24124038186	1216.8553279692	1198.19621818829	1356.44075600628	1607.80290551056	1629.2886854683	1321.38801153871	1445.25428528146	1154.49561011722	1083.11500211249	1325.57764170968	1225.80176371961	1128.43522436477	1136.02065648754	1172.21445397528	1219.39320069646	1125.82456774958	1160.04519524496	194.250012587498	169.08421189587	1197.71757921844	1250.60612088358	1316.74973792304
BMH2	4.67698038995459	3.39175642961753	0.614139349616695	0.567427546063527	3.12110647670928	3.46578165737516	16.8292761274324	17.5991287362256	3.69246707339153	3.58992797258906	22.6560091547656	21.0283112037307	3.93063996544242	1.05716358781842	8.16347843854581	8.80302427436223	0	2.48442790164829	6.21409352563785	7.81536370788379	29.6148342532994	33.2145845531754	1.98868432212534	2.21312369994112	5.28470768107131	10.9141904477886	4.75707482094648	2.72921332055737	19.2149297457676	14.5758057155143	40.306893469498	32.8090944820382	6.61305766899083	2.89651788631731	8.91078221432272	9.03727820937951	23.4042565886183	26.0783059556592	7.56779345862136	0.898198566947302	2.55129717648512	5.93024604310255	8.31337012917913	8.79121082252487	1.74075932856911	1.53820631076845	7.25172543242807	2.32334954911409	2.42909860010244
BMS1	20.2779329064673	24.11328098195	14.9194453788731	16.1853514781551	13.2401001805363	17.9131072053177	14.421590877082	16.5305380683322	17.6150491126158	17.2715520787005	5.50756832236637	4.86001610314787	16.554237789411	17.7428012467361	29.6470352608582	33.0784158128724	18.9898220001141	16.1649983446303	24.3523086101356	24.6419511521567	1.6668847154717	1.60145158536246	19.9016040449688	16.6476928024709	41.0166760479872	34.6690898090152	32.8579490653742	35.3651813303578	15.762951970085	14.8201400693554	1.73431632896392	1.27275876825666	26.5282065996729	23.3162558978466	20.6368095307873	31.226195982677	9.81489886145294	11.5264232789523	34.5833360481794	21.3316397273524	22.209155280201	25.316196432182	28.0929114619709	26.6534115981202	44.1416540610186	47.6235498629281	27.5457279973568	31.6327977156348	22.8170581714366
BMT2	14.5171680137018	13.0801066267718	10.7929325196832	9.42982658779726	4.59931210345279	7.62270416864413	24.9303180244571	17.6345171551323	17.4760957172903	9.73598581740008	3.03561919442214	1.18178428692993	7.69353284537955	12.9925526653384	16.904131137302	21.1999357450168	11.5133394544085	12.4514508331783	19.504322976225	13.2867037239049	0.689057412555473	0.827506612249049	12.2026066092115	12.3519939258483	26.4241261175097	24.1844398201374	11.3981845210529	10.3600954204454	12.372317504861	8.16846926205545	0	2.63066481771141	8.20604090766939	10.2705021709455	17.4728074871511	21.0134644870517	6.31130908548399	8.82366880241724	8.77056757018948	14.9458419273216	10.6753796619393	15.9977705491043	19.5882804693458	16.8330217347334	25.727103659643	19.2363810219129	11.0469257659524	14.9729485724863	12.041005805855
BMT5	18.7479364714222	15.3696784602527	15.2260919320794	16.3467237029263	14.7724636397693	11.2824176271894	4.35170903244874	14.9261125471081	18.4869477535774	12.0170138526591	1.52324742506976	0	19.4697601831387	20.5804973685776	21.4649823548754	18.8408951973064	13.0763290850273	18.3116691444949	23.9633178150025	26.6003984141339	2.33250345517235	0	18.5444004361575	16.2636967799405	28.6105622552439	17.0188153529283	12.8629419379926	23.0564925225829	12.5705130601376	8.64246462946624	0.799415107906346	1.32008720546779	19.4597208197816	14.2394752241772	22.6414700783824	21.0124261547125	5.44569656554644	4.42806369116838	19.3661724475134	23.4028954391107	13.5317613564672	11.3690682785209	20.1317957925005	22.990772929413	34.8353895124571	30.1421984760978	17.012176063187	12.9582670252431	20.1070252179455
BMT6	11.8800841291746	15.9374605857296	9.31305083439956	15.4600093230217	5.41724697415486	8.55075051236512	5.89238469533287	3.99434256985755	20.2321293092135	14.7017616658927	3.43794775134795	1.07073176991582	15.4085703080562	13.2905275904349	14.3583820083618	8.64347612182599	18.0178736419003	17.6741295532249	15.391270697749	12.0381558501779	1.24861167511959	2.24923642381552	11.7691823507767	10.5517348522992	18.9532761547808	17.0424700733293	19.7935094987639	15.6442100207212	7.47310568384241	10.176193861458	1.44346706781487	0.595861332410904	12.1661390015019	11.4527588906994	10.2435138011149	23.1185306086657	4.90133344026026	7.19502999830163	18.2767023452645	16.9266893420596	10.3169723934476	7.85113282500714	11.4091109275415	15.2511661925648	27.6261294867536	30.4074280350974	15.3981743977416	16.2790681890913	14.54593426613
BNA1	26.4431668471227	13.2879788686756	26.4974072898732	35.2775230001395	86.9457997827239	96.2451356856751	85.1558361229338	94.7058955028335	33.3706864027868	29.8781988928854	137.87464698791	142.166801561801	37.7764443852059	31.8976460228578	95.9708132969778	91.0830775318	47.5383060695803	30.5691535640761	129.751810337809	152.225968907346	142.101668502644	203.159550736469	30.924585827992	28.592151473999	89.200501803566	54.9764965691169	88.6140843733167	84.7825857792836	190.349647325549	135.365879692314	148.632379652238	129.169313671715	53.1132081409093	50.4297347276865	83.2707322803222	86.5969170818066	154.947086132548	186.2996199859	73.2102536831979	99.0716571678479	68.1428558401748	60.5501711022544	123.66180759311	154.034547905526	36.259722175212	34.1640698277367	93.8806256761738	66.1675147988834	78.8307886925627
BNA2	0	1.89287368483681	0.718964672509414	1.25632592694464	4.50380403399491	6.09337367985878	2.27446113889331	2.31271528325739	1.01863996019717	0	5.30816844549592	4.95959687507259	0.566446011369589	2.05205053138435	0.738972439796089	2.22424538019435	1.09813845389111	1.45152897292563	11.4419693542721	14.2498745084839	5.30157307190109	9.83962491081701	0.825980311387581	0.740538044973341	2.31029647400927	1.87953580139735	5.97932994868347	6.44120833405372	15.576889579628	26.4246275775063	6.68608004720263	8.74009450277531	5.73970854876813	9.39408362258116	16.5348066313879	14.697899651972	15.135277583133	16.6636384236644	4.29421093676782	8.88582855452585	6.47130225160601	4.66235058233528	12.7223805631855	13.9145623309889	1.33295359569218	1.14509733812351	5.34929771664511	9.07647361053241	8.42210011153572
BNA3	14.085545108462	13.8894686425545	11.7780839915729	12.5416302427606	23.0566255264633	24.4355517374891	45.022776764061	29.9938198236934	17.382657241653	16.5594822885355	52.7185841053875	45.7021020149148	15.6592084216242	20.7102931282445	26.4816364351422	35.678480169433	18.7392603061601	23.1844832119785	36.4971197289248	38.0611447792507	53.7880136592105	49.7801738104892	18.3234897899979	16.6807939683211	27.5969546951214	33.3564235309269	47.6163148789268	43.6919516285612	30.1255396330459	36.5615154776942	35.3696121628519	49.4537265215603	66.2470517346951	59.4074863085554	36.8033740150428	54.8205881945198	42.6156619354047	48.0249275671346	54.6451962145564	54.587737922519	50.9679045240264	52.5103600781834	54.1085108919889	36.1648935029084	5.45912329190363	3.22419529311567	56.5959443105486	46.4657399098521	35.2112296900652
BNA4	5.46915715015195	4.95774918486554	2.82463099118825	5.24426921014243	3.15968609097305	5.23673779181727	7.44646589012548	13.6290982564801	6.66995677394366	6.96721438986072	13.0340105834292	7.30689916705516	3.61631829408727	5.47064238205825	16.6936660320052	18.2052049107583	8.62862207957148	6.55810560799287	14.6960327243635	12.7789900902423	4.26038530488138	9.664342390963	5.40842918317294	6.78855133283292	8.32019197604757	11.6916747733815	18.2710058102081	18.1886454825195	15.8660530762171	17.5364342948972	2.18900099893539	3.61448362647298	7.17496961670783	8.68398742638681	12.7097760463348	9.28030905510423	22.2984482034541	20.0038761854564	7.23036012799916	11.2944205635043	7.82279534985066	7.78481212322273	11.5345375405772	15.7692559184033	3.27302835595942	2.8117522878628	10.5080539404465	8.91474406552959	7.58273472530644
BNA5	11.4642351465226	6.30958735954796	10.7844700876412	10.9928455512479	22.5189678940745	22.0885049277479	33.3587633704352	23.898062032378	14.6004885620257	14.7546257000192	29.7257638633932	34.7172157789384	21.2417461837122	14.6575120165076	34.7317957217272	34.1051191846669	20.1325432575406	22.9341747303979	64.2508376144654	50.8039620447619	31.8094507968367	36.4645141382216	18.4468839388748	19.0071281552035	36.9646946081355	53.2533599262968	31.2254550222786	39.452526695023	36.9230066464766	37.8515079126885	25.0728877520627	22.0802177363022	17.7409124753815	21.5511232426158	34.5073955234432	35.6948729783437	34.0543412505544	27.7727083147028	31.8998432304758	30.3162828692634	24.889638469643	23.7779654082788	44.0389915231088	42.8140379415042	6.99801523832304	5.15293679477707	24.3690940554941	40.4949398721884	23.1607250483323
BNA6	17.7464281563816	20.8314024032235	20.0851493350398	15.9531612266858	31.5908491812206	28.3710033789135	68.0324972080634	67.8714568320492	22.4206106787473	24.5007440258291	166.264479241196	156.74620976293	25.8944099021099	31.7652894512622	51.2973980848594	75.3174379420993	24.1704071517747	30.9656239542445	126.66598833055	123.779462344497	127.297775523588	129.356026530285	27.0371288201475	30.0914064879946	61.2812359684579	70.0091933155091	55.1175074844738	64.0709095021244	173.868867761695	212.815886147655	72.6382518140184	66.200938433427	25.6199683949338	37.4239138732178	86.4194285537325	98.6513447551494	221.020436294413	205.852018283031	56.0868616671151	71.6828784766632	44.6692190889785	43.4161338459956	96.1026953082132	113.263680713807	13.5409832800525	6.78568112717193	52.328977750062	81.5653730620381	49.9080899040335
BNA7	7.82147112705285	17.5775546608552	15.0219718521166	14.9997173875546	14.08325817303	14.6512768209963	30.1729292458514	24.544331742854	24.3238209214761	16.3739360203305	39.081977349674	57.5696474121724	15.2167723700011	16.3334627177528	38.2325365257291	48.6861587836108	29.8642291349399	19.0633840214293	45.5365904474718	53.0129692817933	31.6487002048489	51.8289698811778	20.2712319704939	16.7007052898351	33.7131281448533	47.3743083858058	39.6608444807593	40.0542816609721	55.1047081028342	54.0034030008877	22.1744037180377	22.8840427962942	31.1492738582108	24.1912344258459	25.7497839690934	33.4253838769128	42.6665618996332	52.8085376524586	25.6350734201076	24.9625605895059	22.7827944348465	27.8327627452246	37.000615302591	51.1172370744897	15.9146263206125	7.97519030847261	23.6546168004134	40.2903326630042	23.7419633389582
BNI1	6.56920928204796	6.00430102297354	3.97265651600147	3.98514185733768	4.74016951623563	5.24779975210501	6.36137051022304	4.41743533965953	6.53186162832031	7.31654602380861	14.8824863938349	13.702208787237	6.78148244845804	6.71919644972066	6.80535708418424	6.37266750414114	7.26637797633095	7.24812782097033	11.4377184159229	11.157745037684	16.9648755525775	14.8063957696926	6.14163811359557	7.0723439110777	7.87999557334268	8.3339725645416	10.4691693409654	11.2046337105752	13.3415541280396	14.1771689056062	12.542799322722	13.0854198053562	9.71733132823829	10.9695212874083	12.9468178088371	12.5687686514397	17.422977807845	13.5145112990226	8.91361594753618	8.77144877143302	7.94609307596359	10.7818362418349	8.0111685432171	11.499954529391	5.86492898424807	8.26058810960892	9.36603187429587	11.4307075885815	7.46879895316215
BNI4	8.88822275570788	9.15104624478329	7.73650640831094	7.93497565360953	6.77286561519574	7.72092974271745	11.3505557615389	11.1807697897253	10.0080497767701	9.69074233277388	18.3774799161591	16.6292609451101	8.74546012237757	8.09190673617327	10.7176953394058	13.87493392638	6.85022639692813	9.64326509396558	18.9419417943433	21.4498688334626	12.8527517552295	11.1025864745058	9.91856058105947	10.8558324787546	16.5734827186623	14.3626585013012	15.8522329771805	16.57454436623	18.8940475695739	17.7089290370926	11.4697296897524	7.9629621624839	18.3091290356145	20.9411084617965	17.8260827371992	17.9279072454529	16.8175746992785	21.6558916158386	17.7945130902422	14.9172063059499	10.0144475924564	17.8865988272191	25.6402617626521	21.2826133649943	7.01578775039652	7.63424396695007	17.5188286664987	26.4585896141172	16.417908551555
BNI5	25.8842910922111	22.3733507056818	24.0373049986141	19.4104235949222	26.0737552379006	26.2367689936608	26.883655949807	14.8394478692517	20.9841775320909	28.4593654729484	24.7380673107799	22.6111359009107	22.6682744840255	23.462820673581	47.9152971390455	38.3084723162121	28.1846068860242	25.8822069206561	53.502130445332	52.7261132355864	14.1603341667482	14.0735479009696	25.9414215212716	26.7591849612964	49.1528161680751	45.0661441734802	45.7701436050596	57.1004973805848	42.0836050233044	43.4131686419968	14.1121943122085	13.9812474356805	53.9209999767496	51.505817638213	53.1687440756642	59.56314061422	24.9175978025601	33.1393905724221	50.3423428864117	50.837285034791	52.4498213006156	51.9589643067812	41.6425188138538	58.0153707011474	25.3210194806421	17.111870172309	40.345294101739	50.221971146164	52.6180223407429
BNR1	2.60968317392866	3.81681088517697	1.80332649925983	1.57557490367953	1.8985770496984	2.02282712447008	4.25068036310877	2.95727715356334	2.30448904379014	2.51185447962488	2.8194558955003	2.1952577405462	3.67728955780087	2.68163621466325	3.27090908486283	2.18781154862396	2.9164018784058	2.48428755814734	5.06453202575875	4.93622870284328	2.41773836521631	1.19557517272273	2.84355782369077	3.20499155702428	3.63591551863461	3.14286369771734	4.90115737765581	6.89011505523732	3.57507088841596	3.7933904361905	0.657658620972945	1.49315082570204	2.46357008375654	2.44593551407493	2.12137975331041	4.02733688884645	1.67482201668676	3.82448323141915	3.80147895574467	2.6220738203527	2.35026562540343	2.75158505310016	2.31026988351654	3.15844891112283	3.83501442861909	3.21006280227536	4.5601241422954	3.70845164288309	3.7278508082483
BNS1	13.9482453315707	15.5450036464391	4.49006427037925	14.1501786859559	27.3531033407154	25.05354465503	16.6925886508594	8.45906373422336	11.1818862000428	10.4430599140037	102.128320663377	81.8685983250036	13.9107197441977	7.44140295994872	13.544656442263	4.07582471175449	11.9036648166567	12.6271725916527	51.196146071844	133.625002731712	30.9149974067264	62.8172981205195	11.8478451304695	6.54902488462057	14.8035385934562	27.4567411724367	29.847664238263	45.8899507785293	74.539512967414	77.5947480019099	45.1129623255706	24.3403676473963	17.1492940483519	54.581258054895	54.5524760702571	78.9254734469675	117.027279012176	140.646009326338	58.1854920779388	45.0653091337856	37.9223487635733	59.0002395115016	44.9811632642219	63.0090366329845	27.132195426136	20.2698930213339	29.3193855105292	40.1089271606979	47.2350973846272
BOI1	17.5861710273672	18.0050564531624	11.0940707181745	18.5892020087744	15.9120782616531	16.5294644710026	34.2950725849599	23.4651902354489	14.2110093100952	17.0335086917152	46.6765531512831	44.3802155895163	17.1220205742882	18.5896818927736	18.1195750873806	17.2391078164799	18.8793201466694	17.672930785821	22.3253893584139	32.7404118903896	69.2760858886268	68.7583553807565	15.131507871629	15.3402951830632	12.3714387757078	11.6539247659786	27.2441140199256	34.0383876110956	31.7067312087506	32.3059148229535	91.6290271260375	96.0683455256616	30.0003383705521	36.6772079285105	22.1862504915898	32.6215314113227	37.3247305752285	40.4415634411121	31.639965585377	35.1346600381108	27.9892401653397	34.4931661348714	24.4099621259598	26.471163614864	9.15712228556308	9.68195846875847	27.13749338237	29.8115205926372	33.5279254040358
BOI2	10.1348810319687	9.63624967773061	8.27090566009584	11.0886745061206	7.52921947559601	10.9779530971756	11.7292170142072	10.7032724575855	10.3713939409964	10.9180177176778	13.0552219686936	11.1486159019403	10.2239094806694	11.1637013507326	16.4159140079049	18.8229785603528	10.4547903405065	12.4373287683958	16.4097596027835	20.6447615845488	17.9716070484762	15.3833751260515	10.0480808678648	12.8275876520099	20.1622000537981	20.87638813783	21.6108343464768	22.3575296206979	13.9602839441706	20.6813095677336	13.924483441842	9.48883776360949	20.6987374659314	19.7285559289767	18.5366432361369	20.6148059472062	17.7616890881303	15.1790883073123	23.1183143098466	20.3199020063488	15.4024644610619	18.8647767096296	19.7989736249523	20.5927762721223	15.8629543873619	15.7850108456541	19.0979972986779	22.4338896077778	16.704632671574
BOP2	1.00541600196648	1.93672895014538	0.551717252475536	1.4461136956429	2.71552390588884	3.11727199228897	35.4891485205084	28.987179415812	1.82392181298729	2.17738009477694	163.749323164237	140.183093343664	1.73871058052682	1.34974066664723	2.26828846903501	10.8099378455215	1.68537095161024	2.00496772125466	31.0687313294269	47.5436628317281	189.730832365598	187.435441230553	1.26767485602566	1.51539218388923	2.36382235835686	1.92307999598296	9.68662990257184	10.5035421677572	96.0694136069617	141.943652636618	190.693426451236	169.085656604865	2.00205641891061	5.93665011135485	24.2734831280051	44.712483951653	175.668834658734	161.498900395078	10.8273355371227	16.8463685934771	5.72992193192928	8.22890897441203	29.2885862871773	35.3186150259719	1.02287895734126	0	10.0343140194094	14.4658661699581	5.38573942600539
BOP3	13.066386786144	12.9549896893278	13.0749017270141	15.4771207350321	6.7939589408806	8.93650017988594	45.3655575541289	47.032932988797	19.1222740169624	12.9834124263342	23.0433419050787	29.0948055707964	13.6242129253311	19.2609311229374	32.9467347702483	23.4868593266654	10.3073261946204	11.2400817524211	17.0388386060871	18.8997771247329	39.5830402896103	35.9919005291338	13.5673886731324	12.1639331815491	31.6237624644134	32.3430260453758	9.35388103495267	11.3359590303524	14.8915197414929	20.9482182912231	37.2619839471519	37.240085952331	9.79528412197406	18.1536167327375	16.8693873797948	18.4763910339947	24.4169926569929	23.8956814135547	11.5160829034466	19.011178181876	8.76070193107317	11.4874381386678	20.6678915131938	16.3256106016638	17.9850733432353	18.4733001232591	10.4603652241525	9.82996041478251	4.9406963488484
BOR1	7.45173433124605	7.17710516093431	5.72473532641495	7.85986715487337	2.43954636035764	4.23574621782191	5.17435983951096	2.9230053993831	8.75461761499152	7.31581219311599	12.4785936741269	8.77569672622968	5.3694289420268	9.11450511758783	3.92270899954054	2.24895332338981	8.32750378850405	8.58577681434825	8.34303529773924	9.86649227888251	8.40620489939611	10.5341393889546	6.05486876345443	6.73885739905445	5.25590978556725	1.42530664255464	14.1067570983145	11.6008565686694	10.0624585536192	16.2475041831805	9.29551636402236	7.32553003744775	8.30947929606723	10.0571576153149	10.3581658806669	11.1458257982483	12.9122016585541	16.8487033816078	10.6997101654199	11.8912671794059	8.68231645652533	9.19255296885234	14.8427380665606	10.9576599932762	10.1082048511819	8.46653972091722	12.1696376360198	14.2953791179474	11.7089988756454
BOS1	32.8625855778984	33.0276924704745	31.3620841030872	21.9209302127925	28.7674278175534	36.5476163862588	69.4501679954923	57.1670759205073	32.5849726432057	29.7051841949699	75.2534955333708	50.4801340492181	36.4457597009798	32.6083432659906	70.9166793151529	54.980553605642	28.7412329470374	27.859646848965	71.0271925772427	87.8340272611479	92.504546430856	82.055713950422	26.4221385082829	26.3808698525313	40.311078632125	39.6272655229257	72.4515386377481	87.8040733257117	60.398463344332	77.8835671429992	58.3309903270063	65.2145551278568	60.316975945296	57.8511566062653	58.0150818304407	68.6936244206279	79.7763667096768	84.803413976808	66.8994902667132	69.5417149695485	56.4572318056091	62.0297943540903	76.8411717758321	68.8674312770421	29.7993380855961	32.4676802154117	55.7429884117327	77.6620270813795	61.2303002034008
BPH1	1.56524214188533	2.43528929107473	1.58569762358075	2.02041861600267	2.01029848956808	2.51983636691634	3.90163319109122	3.68388103818863	3.24515286572585	2.60751213283456	4.78048702934996	6.22888773395351	2.34246170599517	2.64008200581578	3.531297623962	3.95176451246902	2.62380446196609	2.72117861627297	5.82358795951555	5.46583090097689	5.40347658179117	6.1700559893499	2.47956488882911	1.6332767691859	4.10464534637465	5.87261355473229	3.17478958515154	4.73543966114527	5.72588067808334	6.69436292401732	3.68659945797272	4.65003641851961	3.93198913921675	3.85940965760643	4.36029765576152	7.04288609944001	7.64985156101419	7.25965159160166	3.94625140479369	3.65059158160714	3.38517891950536	4.88439376103897	6.11551900009753	4.91810302289392	1.71492336194377	2.05200577376669	3.93268679591379	6.03119271586092	4.12780708293919
BPL1	6.49394372653888	10.1637895133864	8.01792114314529	11.2863138386484	10.5635218202118	8.80882430839737	15.5007754471867	7.64192789904912	10.5184314948066	10.1961258859347	23.6787835860603	21.5093337754492	13.3359624888457	8.8995695545837	16.9400053538224	13.3211697143933	9.525046522941	12.2305852485668	18.2677190232191	19.1926722455969	17.9162099213912	22.2333047114574	11.2583363836951	9.4820075409627	20.9933229903693	15.9145544774658	16.4646319205721	13.4686798583782	17.5144389809482	18.5839514417861	17.2601421395624	16.8150164091995	16.8105546979168	17.4605792393298	21.3793370627429	14.3097465922634	16.8007857058418	14.5301854057757	18.6236098079251	12.6297733464875	16.6542411093285	18.1981592126589	12.1265747083991	12.5997309335585	8.05196064803661	7.62663793889365	13.9933309611428	17.3027297712276	13.4797527618208
BPT1	4.99934604734816	5.95770070366338	5.20774958308389	4.95630282217887	4.5771732597662	5.97687560070284	8.82580877027213	9.57252626042893	6.8514073722627	6.97322615668878	20.4605022260491	24.8049502599632	6.00798046104643	7.20442715045715	12.999395666546	15.7275542245564	7.29140452850484	6.00801756074889	17.3043725719814	16.5084268069869	20.0734828658667	16.919740323883	6.12537216116497	7.08817734894826	12.1523690706234	13.7763140710724	13.4057355234603	15.8298748132023	24.4763504109696	25.6807357023879	12.2516998471363	11.3050403477959	12.8234749996727	14.5811477484985	14.6920709665887	20.2333715085153	23.1660793999834	27.7805005234583	15.8697770680529	12.7104737339897	12.4912316868564	13.2672884914612	17.2154798250863	16.4751109004286	6.29308956001257	6.29487149736357	14.4533617098225	16.0748590484073	13.6171089441192
BRE1	21.770555759669	20.3911593216626	17.3169345574647	20.1093162518448	12.7505886521271	15.94596054483	18.9542584279248	17.8628586701665	22.7749847493124	24.5685669163822	29.4545152397089	24.6977634951236	23.314630767624	25.383084342091	23.8820304557659	32.0986059852832	22.320397027526	22.6585459421887	27.6394814014535	38.5345342845057	22.0414410747013	22.2349740687893	21.3214949444785	22.4273757219281	36.1578637738942	34.3825018975176	28.763038614866	36.821881275442	32.0128934540211	29.1775055609194	17.3271996085817	12.0613673346011	34.0444801549579	38.4128755516552	33.7541934875293	34.8890660048211	26.5334717978471	31.6119161337014	32.9180370137849	31.2349005866775	22.7654483669143	26.7238323399923	42.965857909981	34.5914028584087	27.6349904258216	29.1516973385571	35.8803713598574	28.5241670624777	26.9615158592772
BRE2	8.65976007409539	11.1208495634093	10.1376159974612	10.2412305643992	5.10306881463552	5.36988672742727	11.3583136993984	13.5874696523368	10.7723349792717	9.00192933071373	9.82363528519834	10.1983688333216	11.7309763090838	11.3671276466414	16.9320838897684	20.2549582618959	13.8711368414044	9.46596447110561	12.7981983047654	18.017948978391	11.8926379310073	10.7116477185845	8.73492207829741	10.0067046108579	28.5038435234354	16.011611990039	8.19681883032411	17.7389109565287	13.7274134051709	13.8464543902576	4.41918729414155	8.51313154591953	13.795133332009	14.1225012622115	15.2051249028695	17.5787832660203	14.4497270178035	10.8778562484826	11.8936711309058	13.8190193795172	11.8445984031014	13.1480791287601	13.7991650918102	15.0922331368541	9.39750690399283	10.3436583740925	13.0949267555232	13.5363762216209	9.89612845790532
BRE4	8.36464701535121	11.9695203488104	7.08181179710513	9.9686089234893	7.39374648052207	8.89184692657785	9.40391367541294	6.46848569764311	11.891686389195	10.7654373821262	15.2983580988674	15.3793553272472	9.09252305790575	13.5820860991257	9.70520476146933	10.8191964428299	10.1489925284409	10.590788392947	14.1280834119682	15.8217593692029	13.7144985825853	17.9482499245079	9.8434361741357	9.81580340967614	13.2043738247512	12.7993985048202	18.905092992523	22.3236487525158	17.6794992942302	19.0197031712044	15.4482393180855	17.956417060769	16.5610950721784	20.3610571816512	17.0473522579565	20.4905725367502	18.86536553762	17.3368583904553	21.0371449446983	17.3525357417016	15.4362189716328	18.0295241370773	15.7090649825141	18.5478257568751	16.2904567219385	13.994600912322	18.6477816772891	15.5372959721374	14.8504498565236
BRE5	56.4429953005909	56.8092457868641	46.7690410853447	40.0502945713744	39.0817242841032	44.8440866020621	42.4593786181011	53.1368194424599	59.0954753783884	56.2283656096792	53.509833052675	42.7316229007953	54.4171988202677	54.5565156166666	68.7633158108186	61.963537835059	61.4998642882473	57.5288477132341	74.3165806462918	66.7262288707562	38.6187222191361	42.8875828710447	57.1700697554946	55.5098395540138	102.181104226008	76.1116234527766	102.463039892705	108.219513739708	50.7014778873604	56.6106763000688	30.7237806320029	32.8960578660346	114.640829976033	102.363847653722	83.000198555665	102.666026205133	53.2485578659651	62.7466938295544	105.182144382896	102.229710638448	78.4881445174902	107.657282865755	97.8103815889807	88.9930191155244	65.4625924766896	63.6364471233822	101.908759683165	102.866018516224	105.822560103155
BRF1	8.84297455523293	8.97748717789937	8.39357760804297	10.541916940052	8.68503962650661	11.8562206196018	18.2553513475425	18.5624162782537	8.67133970840871	9.73067965700724	27.4993397337307	32.5693386048172	11.9860426578739	10.69495767511	26.959928971644	22.7211483060241	14.1556991056491	11.2266614051433	28.5782801805342	23.9595973391278	18.9900238758693	23.2279943690981	10.245596004522	11.8874807938624	34.2764012676291	20.5712666309666	22.7838689241056	22.324476557323	34.9393881726432	29.1819540396442	10.5702588329229	15.7753973430303	22.4630138209341	20.1602297261172	27.8013784467908	21.0658697309903	30.3698234211097	26.5691479330431	23.276014542555	23.646081284245	15.6183995661859	19.3909349354952	19.9941209468303	25.3821844544962	12.6438005409357	12.5329431400478	16.9137580748621	24.4530636423822	20.9962469279362
BRL1	12.5181750915734	8.13837866700747	7.55621884693363	9.90283851095354	6.45466221136974	6.79218840672707	3.62185332139103	4.41932381677057	14.9231627645598	8.94629931936112	9.12893027932642	7.89768148801516	10.0123228664658	9.80307579472997	2.82418859043829	6.3754200600977	12.2407384146343	12.7590370060818	17.2391116874662	17.1666243213879	8.28873331294353	4.97710232591881	8.94397653510426	10.1414153877673	6.6220466855506	7.18313383756778	15.8691668977192	14.6162538368728	13.780380520627	12.9647924650793	2.12939491583928	3.07655297975239	15.9532876825019	14.7831936828029	13.0505129901461	13.5414417396946	14.4608530571047	11.7934407772554	14.0669929547761	14.9821245612188	11.8903076361661	9.80014294247854	9.35034790174174	12.7832247526377	17.193057292371	11.4877767427984	9.08614071725479	14.008656063832	14.752445994291
BRN1	2.94446554972862	3.19046928968441	2.62561946600152	2.99987281091264	3.2533645039279	3.9940626561427	7.66724387171173	3.89811234489531	3.43385705830178	3.98543449165764	3.57879777719613	6.9661983788151	3.5007690312619	4.44697939343738	3.32146987784198	6.66488885378327	4.52447484360343	3.58829093685898	6.18128346626692	4.52520188690332	8.39433408644933	8.78020128552656	3.40314883653034	3.18980495586957	6.490056331157	7.39192942114868	6.3455727222261	3.61892610159658	2.59309136269326	7.22253677858418	10.6434215341961	11.3716973076463	7.32905862091205	5.89887726947008	2.82734852118031	6.19334701092904	3.89746489183176	6.93499861819309	10.3399134766141	6.16707154815153	6.15293158315245	4.45312031136557	6.04821260634176	6.91569397921105	3.55728728126002	2.41259529613429	7.01269507704383	9.41443376733681	5.12615483706615
BRO1	9.11189648429684	10.9701238960791	9.64306347292907	10.6095044936862	11.665863725334	11.7293555724275	27.4931158537968	19.5305892284604	11.9757118035829	13.6722818769091	61.9664266960447	58.7185163254734	13.6472120720156	12.8149359008906	21.6583298137107	28.7276257749998	11.8193149698032	12.690590311142	30.1681909954887	33.5469980963623	72.7829218799902	71.8806718719831	9.02683783173934	13.1206046842894	21.0403399626209	22.0968741652835	23.4321656422668	24.7978390635283	42.9884804422369	42.572804534234	60.0614733708009	63.068660035668	24.6243204776849	24.7053770815882	22.8556943826881	30.5088915714704	57.0155549568168	48.4402657286461	25.5981683708884	23.109054915262	17.0624362809123	19.2232443002871	27.7104486208128	21.7998725336174	8.44244957427784	9.9545977712195	21.8489534373792	16.9946247519501	20.9185977140134
BRP1	0	2.09780912264337	0	0	0	1.68827522079408	0	0	0	0	0	0	3.76665687987587	1.94933319987586	0	0	0	0	0	8.23963951414265	0	3.84880843647831	0	0	0	0	4.417803455858	0	3.83630962901928	0	0	6.11772189069798	0	0	4.78042692874838	0	4.19347749793631	4.10394811146709	0	3.47571362495336	0	3.10027768589184	0	7.11740073151278	0	0	0	0	0
BRR1	13.3822848884233	17.7780848925158	17.7255967284369	17.6993328700183	16.3158050380205	19.6727407573711	44.8602294946229	39.0983732452382	12.9157167112312	19.5873806233445	38.1390991362085	45.4166262577396	21.1475354793631	14.4548338229599	34.3557082817841	32.3801173899307	20.1120185230358	15.5415515799134	31.619317654199	38.4053104114883	33.2707973323068	47.2947480554234	20.9457936925588	16.3447763561054	33.6328074839236	31.7750688926546	32.7592301847576	37.4323873207819	27.6344838752087	36.2213728432573	41.6028040797382	36.9396307036642	30.8745957824085	34.2541521226212	36.4609991843806	39.9342617621856	50.6417335199773	29.5624308825746	41.4841395948674	34.6099448169523	33.6623888857394	34.1556861080697	38.6045449203684	36.9443121240084	17.8399564782707	13.3091751065668	36.0063677221466	30.4922177282503	39.5505894177715
BRR2	4.82531450705988	4.87986332362544	4.50139193531733	3.23882686535954	3.49511440387752	3.17918422028684	8.79542351365557	8.51748336311468	5.25215595146627	4.65022865066295	7.1355742798723	5.47970370741297	5.37186447139892	4.96636384427908	10.8862768416585	10.3760849802967	3.97691165237154	4.27667580899209	7.3744200778434	8.44256474725964	7.27755026218984	8.20693161212748	4.56299574328597	4.36372922512868	14.3227410761716	11.3061272171546	6.60636578238292	9.0441814215069	6.69294934490843	5.5235233236435	7.48986890346142	7.70835852018118	5.95727110948921	6.91946401054125	7.67818764085354	7.73294955633819	8.82574733147743	6.47798557468226	7.11683579002784	6.16007534520275	6.96660281296839	8.7571659566632	7.56893668223213	7.48978699157101	6.87277219383942	7.01121212683191	7.22366697071592	7.07123197344055	6.59123718985759
BRR6	14.5915202121909	7.4953598592442	14.9464540858627	15.857079891105	15.2863357376187	16.5883071498106	13.5095713965699	13.7367825056592	16.1343468926131	19.3814282170329	28.3758841605512	22.0937777689802	13.4580157221535	19.1533770219321	4.38926957462447	22.0188461653274	18.480642727956	15.5188919521568	31.3668358652077	29.4398727207128	12.8821196518426	25.784213240648	12.2651090595414	18.3273027668464	13.7223931117349	5.58192874320644	25.6499216204459	19.1293865170336	10.2801780340117	14.8469637321141	6.61887244952142	10.9290970899572	30.9926736947841	16.4111367055578	25.6203344290278	17.1483028938997	20.6017605215058	27.4934651095591	14.5749606620888	23.2847735009522	16.2619855677366	22.1542625305727	31.9705370339896	27.0195093535478	13.8552934472779	14.4531953329752	33.5383432962232	8.29404153961338	8.33741472288855
BRX1	112.896111584376	125.589752811565	107.794947995115	126.115901750511	74.2895429923027	88.3833252183508	92.7655419555206	122.225112395619	105.328002559491	111.978047813706	15.5512877989142	7.12258562587611	119.094065120623	122.763309739998	164.282514605407	219.766569894843	110.394046758444	116.068753397856	141.062299965112	139.870515144833	4.9835094775081	5.9848438847733	115.299196965988	120.38840585371	244.194399631353	206.221364729836	152.277078509426	176.219539630485	67.6082116029529	56.6157223356373	2.88061371896024	2.37824149662536	161.860774853166	154.273812545942	151.14815210651	144.739863369615	32.6040253849898	57.43428833627	162.809103327875	175.65242004997	129.53809125471	154.268563433162	143.356141269065	145.721856690079	226.84231866732	210.166577630279	155.693523514189	152.808829909779	165.70291992729
BSC1	18.3669431674776	28.9787378181222	0	6.58973600319464	0	0.000442472619907263	23.2175685291561	0	21.1110600606378	8.43185577957213	1.21411398176477	6.95709879983282	3.05894186198184	7.86111715774541	11.4257103334736	6.23128622091816	6.20294202088026	2.0204727542861	0.626743980830117	3.97745165319335	0.18525392837874	0.58238807411444	5.8624235340483	6.82080879861894	72.5589424271646	50.6445125154716	0.0099900515702676	1.26417619848596	1.24691364647413	3.09844510608612	0.108613082656213	3.04875263691659	0.00252529117170964	0	0	1.65015440033797	0	0.170087795321629	1.79199902575875	10.1779567347945	2.93891147287359	0.691388069211553	0.102933440431283	0.0965783795123772	22.112017738691	16.0304156605582	0	10.8623226369981	0
BSC2	18.3091054513222	22.5660847821357	13.4292577396066	10.7878871781846	11.1593886673468	11.5167458540176	33.3814830455953	31.9084071834797	11.7782866866142	16.5441282925052	24.7268188488973	22.5667676089075	12.8646045259286	11.7331798866064	15.7744119964974	17.4008079673094	10.7439136568634	15.6428912828872	39.9866012622397	38.0229383885636	12.2177250897271	13.1275169181526	17.9155735024202	11.0503334668767	14.0890275432713	4.17929161414126	24.3390652289695	30.0791154758935	39.754776453969	46.3728012933069	17.4453008226752	14.7650155361966	18.240740018492	27.5228876967199	24.3332942374856	27.6092568969453	31.6917567852758	30.8138864783954	25.147651359599	25.8116501504833	30.6752553440142	27.1573829403441	39.4317128233319	21.4710905273656	19.1846166403201	23.051810050756	24.1668170843677	29.7876364826157	21.0160487339463
BSC3	0	0	0	0	3.45321526995826	0	0	0	0	0	0	0	0	0	0	0	0	0	0	0	0	0	0	0	0	0	0	0	0	0	0	0	5.6010605023361	0	0	0	0	0	0	0	0	5.0047049708425	0	0	0	0	0	0	0
BSC4	0	0	0	0	0	1.53131700835535	0	0	0	0	6.40313229130724	0	0	0	0	0	0	1.75094890836793	2.65426794350008	7.47360138086685	0	3.49098478377881	0	0	0	0	0	0	0	0	0	0	0	3.33291051942351	4.33599480362792	6.33205599575961	3.80361308606114	3.72240529672193	0	6.30515164665999	0	0	0	3.22785383156924	0	0	0	0	0
BSC5	2.39683396029238	0.577127419614699	5.26101181940061	4.59655936082631	5.29656805880538	3.94790358625093	8.32163516580473	6.34622733162879	3.41635983856762	5.96931754491753	8.25399277563206	12.8533122017658	4.14496655018965	5.36280054937559	6.08336571388322	5.4252877903673	2.00889763247029	3.18646995071707	6.8429929118281	15.8676686612382	11.4618881716309	13.2355305203343	2.01469400255413	4.06415945568428	9.15714305813747	7.44977374773755	6.07687360453074	5.15522539178844	14.7756695738498	13.7182452496959	15.2891529792705	8.83593882902722	6.2045401495229	5.55991862968306	3.28784888109512	9.60280286395734	19.0354540306508	10.1613089140425	4.48897044875181	5.73721182278702	2.27661515858845	8.10266877781923	6.26603093574035	9.79031182708766	1.21923230369381	0.785550577666871	6.52391240657166	7.66344416811682	5.13570393133497
BSC6	10.8790942059561	11.8941575151453	7.09929193888213	8.45818609961064	8.95214333799814	12.3070968543664	10.2085226591316	7.61216385762522	10.9727501274608	8.91471637532075	15.7243855580568	11.8721265646074	9.15260867457495	10.7891610262848	14.5937496472076	16.6385501532318	12.1577213427486	15.1146441929777	22.1222424032212	18.9093287224047	12.1139173035935	11.9501253747382	11.3689501413765	12.6303305770115	14.5170778948112	17.9967063715681	23.2589268274187	18.7917012845943	20.1974081478103	23.0793715764383	7.50232958240604	6.19395829388014	23.888069965225	28.2744675565091	20.6507033295902	24.5027497734457	15.2847129493171	18.2824026184088	24.229927441627	24.3986340913555	16.5334749715084	20.0890862471593	22.8408928626036	28.8244881590714	19.1447424145142	18.2454627796078	26.1436050579962	20.6823882062002	27.0907301822516
BSD2	26.3834283609528	25.8905520663281	24.5848088039548	30.5491704335336	22.9787082973845	22.7654563561417	86.4160392430946	71.4673635745589	34.0581167287346	33.2041453859306	96.8061912697619	130.648617241746	28.8388818836017	29.8498596749322	71.8763601327294	60.8460001166982	27.2589206278052	32.2073715553103	64.874707721482	70.6189670960826	134.041881128982	114.353450360065	34.7299209006756	24.3846473774155	72.5628605081856	63.7940984274656	52.5038075976748	56.2877113177041	78.0341107941381	82.4894025033138	98.2261809624586	130.032461430257	49.9590852996498	65.5054187008024	68.8319125081725	71.0011653483685	81.4659257317135	112.555096762714	60.6002941044613	55.6062549099459	49.1742273373038	41.8055481956994	56.5178206912166	52.0538683113543	23.8029127655793	26.9744104684715	46.9716252278683	66.8482119344965	37.3321337855611
BSP1	15.8970283029266	13.8757686028223	12.5399027753207	14.5288254623465	10.4900480426403	16.7503851386339	25.2969729447237	16.3688269522373	12.359460162341	14.201289133521	35.02051128694	30.7149699196624	10.3092913910446	12.4490562999321	21.8550916967071	19.6783228122339	13.8791927256544	18.0521213824356	22.3593968652071	25.3708921125396	26.6804558508646	26.7743276226382	10.8569951320837	9.35953041498351	20.4396001900821	17.1036797106557	30.7326084895038	26.2545981375273	22.7498688057752	24.9128751583193	26.6189627560544	38.0231056588367	33.2379706131886	33.9429415675618	27.2583342374842	29.0588299207163	30.6067347729378	28.5492422217177	21.8646442796538	30.9173055132817	18.4970967427023	27.2241233934056	23.7483809064969	22.7270710135362	14.6568793123356	13.2425364865628	21.1841919357504	30.179108419254	14.9023667743114
BST1	5.51966332482284	5.44282646643411	4.32696810637856	3.90650002868786	7.74438708035169	6.82508470747804	5.47539553538227	2.78374252859944	7.62909234430757	5.91989687019484	10.4358087193142	5.30641007016006	6.24995583946133	4.7047294300359	4.74390987826958	6.24690072016261	8.6650808792473	6.5227273504631	12.7128801759268	8.94892267028492	7.73494752354575	6.50239412011508	5.52337348663135	5.74433188676922	6.48858705077414	7.5411248638429	10.929002741586	14.5370802199517	10.1848988158597	14.0407267596433	3.80037196231243	5.53691824577423	11.5145198977312	13.967920614557	11.5376138497723	10.9517798075804	11.3861354535552	10.6477845675548	10.8298693166213	11.5344065948868	9.98627195238271	8.97905697552894	8.24571042102044	12.2392691020922	6.01662826109178	5.6281172637082	9.77741373118568	13.4461852728254	16.614016792802
BTN2	15.4819445653454	13.1362187600397	23.4640363083161	24.7422436727111	10.4989872215551	11.4289451639851	2970.87921421235	2497.70803782324	19.8701694187004	25.2261638897483	89.0081147234645	120.93089444584	14.0242763011732	18.80458868261	1417.92385540371	1763.03210876141	16.4776300373993	23.8493897859327	35.1628639386306	40.4399239619965	975.218197153966	1002.4614434416	18.2809500994692	21.1124410486139	871.851388784096	804.475093159725	24.6730961599733	38.0563156297821	61.6795900520107	41.7935904101364	1929.38350376761	2083.66363558603	31.1222922537992	38.5563791195781	29.1254122896169	31.899890435641	36.9046060013735	56.2586724273887	26.9246019384224	35.2937829795969	24.0888595876146	33.5802071071429	37.4457914502669	33.1251727457213	3.00016206660336	4.18817347475636	28.0933480884915	37.714886332613	22.9052113890551
BTS1	16.5126803050244	13.1777225636484	7.24899480492661	9.04782314798863	8.34056758288719	6.94821417120438	13.1042191434086	9.99345138693825	15.1611747867979	15.1216539433624	19.878796054404	9.52481172148138	9.7906620171321	10.5560695944379	8.5151641271501	8.54328308500744	14.7627040604466	15.8895449857972	19.6499325827763	15.1706485240423	13.1897715540468	5.00211177187329	11.103968270206	15.2885763691308	23.2936773337879	11.7312781403209	17.22484208835	13.9165813880101	6.64780411743243	13.3727909988711	8.02537784075599	8.61346623623322	21.7955263280342	21.4902546894907	19.6741838934061	18.1459570366661	15.4418765823212	11.5563829781329	14.1376633699227	15.0574015355824	10.0380288685913	17.460236467488	22.5536482530317	20.8128739341928	11.5196258598663	16.9059185610007	11.1293941724295	14.0790573214669	11.1199705344318
BTT1	7.7123619911558	8.91378073163074	10.1570951389331	13.3114418786646	6.05969164826684	9.56483110743393	21.421421201865	21.7817360525131	6.39587057874094	6.68090752270652	22.4971165960576	35.0330653031993	12.0035895399413	9.66335329219342	20.8795224253672	20.9485022700036	8.61878916203097	12.3037685366635	18.6513213049519	14.5879394428537	54.4707708851031	57.2386768854622	7.779270967233	10.4618526721317	7.25295568195074	14.7516201408848	9.38582578095303	30.3325420047387	16.3008145506416	16.8157807414756	55.0997210922516	60.6543409584529	17.2002652376761	7.80668271164392	10.1561974883132	24.7193336837095	20.7881716470444	17.4380227558502	20.2219840142579	19.6914911259806	18.7533497354526	28.5422473413708	27.651327344058	12.6010360948969	3.13851930090758	12.1329151354289	5.59792982698787	23.0150127513727	13.2202184312725
BUB1	3.1805313113991	3.57389379025643	3.34517051175479	3.30391584998338	2.21264542982756	2.67074814661141	0.613477407524213	0.311898416427314	3.57178609107954	3.55876839240982	1.71809649564713	2.67545193679878	3.43766667934768	3.43954447142083	1.49489863369396	0.299967042103868	2.96195908852874	2.70144281145264	3.20487821722057	4.51198987051089	1.94995414253197	1.40505478666184	3.11902278433358	3.49547748911132	1.55785839954149	2.02782895063297	4.56953031549819	7.81814337306881	4.20148093628805	4.04526728530236	1.57798234895194	2.04723181516482	5.27775142388929	4.47144600547677	6.39888505270974	5.94657206094623	1.78602911130756	3.24609310169852	6.45315080787523	6.13279557711565	3.82661290774844	3.96128724618619	4.35541852765723	4.9800803888144	2.42683399193668	2.77975789887709	4.3285244783874	5.64955875787432	5.39513774510155
BUB2	6.87760304556875	4.58595584141425	3.48374561283068	6.08752363210901	6.23518184485693	6.5612193092009	11.0208895807097	8.71597872902442	4.93582172253837	5.95780204789477	16.2897653907409	14.6860301645145	6.86177188832784	8.0492649015853	20.2906480716977	15.5676057002447	11.2332790078329	6.09558605769243	14.9266610978979	21.0145624724732	10.1198062099855	7.47890633125237	4.44696880338332	3.58828449616789	8.7068575968036	16.1907050484153	12.8768309579928	20.8072877323955	13.0455541781765	18.4562734628631	8.99931251392924	5.20088933515131	16.0128074989663	12.4954444058351	22.0618275697903	19.5003088771034	15.2787168802326	13.9557115326968	8.91752678111015	12.6635612103409	10.4522248420543	12.801784325139	20.5487656736768	12.1015745808886	6.45881443755245	5.5485729315827	10.5600101033888	5.63844696002146	9.06867431031662
BUB3	12.4593746477484	11.1113125191758	14.6869172921343	11.0620988175557	14.0497231831246	11.4459724745851	21.3620360346783	22.8073843930556	17.2209463864835	18.7879003079847	14.2086713886022	11.6452646472215	12.3693064163423	14.4548338229599	22.9037751707524	33.4246373057349	11.8609271660213	19.2224399891665	35.959166474458	24.4397653975692	9.50592443004459	14.677669770985	12.4123212101916	12.5194121419112	28.2081263583785	27.3618784277357	24.3354327160463	21.552016414338	17.0683450074029	23.1414510929713	14.1292589367872	9.07288037268695	30.1394672772608	25.6906279383156	25.3201493044865	28.841390913232	24.8766246638159	25.2149829649191	31.1131046961505	25.7733608537249	26.6494205020008	29.5578355563543	23.4384652894045	30.1586003490012	19.717842636462	14.9224136573331	30.9821960970138	24.5905110088632	25.7078705569538
BUD13	7.34941365968648	6.11291736007709	11.1576389084741	11.585814024973	11.8358126765149	9.84016387815595	26.4069121970573	31.4126819418333	7.90400910373817	8.79625916697629	29.8260358664613	24.2529509721829	7.33232723361095	10.7885567897623	22.9573588672556	25.8280833303661	11.3613438736317	13.0364785645116	15.3405587994147	18.0280551849598	33.6341554973499	30.3035345065135	7.6042535440025	8.13937138220894	35.8229657986277	20.6848580615109	18.0431724628978	26.5578112126365	11.1627579927173	18.0065787404268	27.0122998504508	31.2211021780581	16.2104410726665	13.9321970324226	18.6131720872664	18.2958433637353	23.2006567317041	20.3776335088674	26.1504221372642	14.1954584854666	16.3241501247045	18.9932206004273	22.7814182714458	16.6263316391395	7.75268876025799	9.98232297026386	20.7171732431842	18.9615949460789	24.5067452731089
BUD14	12.0127183796666	14.7944534034295	13.8322116558943	14.3512503961141	18.1808000495034	24.7284330630131	20.0559779603834	9.2697130610597	18.9852586048353	20.3004947110335	30.9564098702791	22.3636273525927	16.5171236429562	19.2110384500794	21.3258104260646	21.396218007955	19.8067242037358	20.9445716986738	32.5436273194698	27.9369442328628	26.6584453851924	27.4910383704857	15.8910961632175	21.0740808190305	37.9659602130419	26.7437342496689	38.3456611253597	45.0190409923974	37.4606844580257	43.3673559506516	12.0594851169103	13.828225807042	37.6454290510578	33.2230975412037	31.9843155481596	30.928377836471	45.4981722133006	38.218835893602	30.9812930800586	32.6825180216294	31.7240829974737	32.5159802129235	37.6564257201395	33.1411906348746	28.2494332577636	26.8497697506437	37.8787632821426	37.3591268271497	40.5082630561524
BUD16	19.0952836775777	20.3798561581266	12.4608312318313	15.3409108668604	14.1923841144604	18.8014810736612	16.7237127587007	20.6488961089943	13.3747695599843	16.9885474496631	16.727169865663	9.11677404877245	21.8661273500213	23.5563046955623	22.1222817687354	22.1953600718504	13.2651092549165	16.0092462968112	32.589070449146	17.5713039466169	12.1500861867907	19.1512382803454	22.5578921695723	17.11299338785	33.9743661969258	31.5882697604157	23.0292772236468	32.9837051577563	17.2710366085264	19.1295208400232	13.1683354143192	7.97264139168373	30.4190608136688	40.0507325607699	40.7775087823704	33.9099796874129	14.904495546369	22.365587180511	29.9636501183797	37.8837339239298	23.5297536250204	32.3224748741728	29.2971836043149	30.3560949897108	18.3768281179148	20.297471006932	20.6027523299285	34.1021303572161	30.9629884250399
BUD17	21.7478946314442	19.9721853625589	21.0927340257285	20.8536626742996	17.3856313332889	16.8572691580633	19.9011424506033	19.0455379878764	20.9715806413013	24.0968266780527	20.4907123808196	30.6321951287822	20.1167807020205	18.5586356447841	26.2439469878667	33.1994782284888	20.3474458167995	13.895994793109	33.2962230243833	34.4396103045917	19.3489304860573	28.5990588425505	15.3046240796403	15.2460538858976	40.4293557029452	30.956420476302	27.6978576194692	34.8103747227622	24.9428921546677	35.2881882391168	17.2065462072344	19.1777461926381	22.5593461630215	36.6898357994045	32.1914799953501	32.4211332698744	33.1076951880891	32.400877270197	24.6280613158903	34.7046918444835	26.9022511624293	33.1156998501038	28.7111527813426	46.2760377171866	30.3583367559414	24.3117854016632	33.0392120676291	32.3419283155592	23.8414246945266
BUD19	24.6121328753661	13.5457818262887	204.516104013406	43.8286861526211	86.3305124387068	21.8027472729851	65.1061845761621	74.4762002586385	105.698987914614	54.8242088035947	0	79.8566500341626	121.608195667942	3.14677748968495	253.836031505536	310.384715702345	129.665380448988	34.2786077234172	0	59.8549327521078	0	12.4260776984899	20.6880734072949	127.186659737281	157.063134366982	100.877384123346	64.1838323861155	25.9282656567301	161.014487916514	15.3324454699636	41.8662298386316	24.6891691491283	11.2021210046722	5.93172081087428	7.71693213670214	191.579645970614	33.8471437521894	0	92.191016236104	0	5.34347966715786	130.122371217033	189.091513012048	201.066036735598	25.0395960558433	49.1673282026372	146.743087600348	29.9782544273588	180.810089644472
BUD2	3.77937260726485	4.22720655052568	2.80981618233786	3.97466805795075	4.66978001676928	3.40195820063649	5.07937127893307	7.46026461173772	4.04418333842741	2.53464274505669	11.064051384691	14.1524810575672	3.4787385610322	3.05513495043888	3.85068286000127	6.0710374177748	4.35980309202136	5.2945755260513	8.02607096505729	8.53228814216347	12.1983731915378	14.2185346766513	4.61147673137457	4.96135010390201	4.87276554012882	5.13019674247617	10.8803911715854	13.7853151971477	10.3071543090928	10.3669472849867	11.4060250941841	16.2654457409721	9.12801034475264	9.04980798452297	9.90040474531277	7.0336021867609	11.2668136787734	12.1747887867817	10.5032320899498	5.83646028322319	10.1903929788069	6.24721072623518	10.199126869017	8.76451434060258	2.72871352749817	2.45070149669694	8.6278169472344	7.79605784566484	9.14295621204986
BUD20	122.639656161282	120.581038469685	77.1120795661588	121.271706438879	70.2622076496454	62.3836644205957	118.27668939901	156.346198945476	100.645835152149	108.451144607911	86.9512531220673	77.3727787505853	151.332447831252	120.050000022289	236.333693255191	150.365125400456	104.217671385256	99.6371608778901	204.247409373734	161.897731840146	46.9931479630392	40.6335795046258	115.972279965105	126.118816689421	240.280726451542	210.140732423497	202.10981388384	169.572267028344	101.254031954752	139.270581689433	32.5960852184844	30.4996004591987	120.069208210135	122.846475785427	151.407390059783	186.303085336746	93.4640599698282	154.052638838625	150.732889908742	146.77871084144	89.3078715933845	116.377090958755	206.111256657918	208.727333792141	272.934645171731	256.799135644179	127.497436647641	171.552169583804	112.228997189715
BUD21	61.9374549087281	70.4257733063556	56.6463206891994	69.2891043683551	43.9337119506237	60.678037559476	15.9290782665158	30.3693393918375	60.6389405685451	54.3991514870191	27.8815946069654	23.8798054781922	65.4567892288387	70.0606493207021	32.9929888362188	40.8906200358192	56.7193485647109	68.6186157284977	91.3053659501269	104.137680138694	18.9865615554265	19.7613574711459	59.2930934168904	61.5875735827998	56.6299840364503	59.2343462412993	71.5380684761992	103.613962565711	51.515693313326	52.5180094780254	5.8532162734064	4.83243001741556	82.2228329923599	78.3686775391253	79.2980094844175	88.2307635565833	34.7809315776179	43.7635969910701	85.3894707471669	102.955905657705	58.8308302364446	67.3459442787713	131.080821197037	70.2764122673851	103.271459970671	94.7318526639698	82.7319213076611	75.1797856470008	62.670203102357
BUD22	35.2444725739859	38.5256218591465	23.0240342643486	31.3812696282013	17.0327428697556	21.898337668037	18.7757335007522	20.408197385038	27.5464101256777	29.3193585961925	11.7858169760063	4.94123455224352	38.2145629074875	32.5444668336119	38.4947643013098	38.6219133699557	28.445890014164	32.7243034504561	35.3261957670319	33.8614613410012	2.05789816505174	3.45995328581947	26.09837739992	30.9874159561225	51.9537543379341	50.8269221119661	41.4167371246255	37.8167252670008	21.1849984923912	20.7361520069381	0.475810775285767	0.785659042715382	32.973924892392	45.3022099053265	39.9049104429231	42.1372975939135	6.46252328549648	20.5547719096285	43.4816391543978	42.8510380175628	32.307614098967	39.0187145291034	37.607962761206	42.0461877959038	52.9309461073857	64.7844666484138	40.6057683765307	40.5437316969467	40.7557856312784
BUD23	35.8667896137969	39.8146366472115	22.0167827402757	28.5626818799304	29.2556847243605	28.7434902772936	39.3983179940917	35.7687417753843	43.4822521678258	34.2295326575899	3.94064472672944	3.06822741910433	41.5257757947755	48.4220762548888	72.6889930830966	46.7845930358797	40.7612934442189	40.9478478412206	48.1882778917768	44.8446278225296	4.47244006657353	8.5937278887436	36.7911550674487	38.4828473260362	61.4580393745287	68.6030786986819	56.7195525221843	58.2781679767141	29.9804343725637	31.8112705468349	4.13631987352128	10.2448653928105	54.2308877105862	55.381133982314	42.6955872423038	59.4277298615255	15.215425039896	18.3268719476859	50.0957400425992	48.5043496390959	47.1175462557167	38.0732247773984	45.4074959770756	47.6760012291914	97.0996893249835	69.0698500688461	70.5990370558992	66.0856264216668	41.6821482921357
BUD25	0	0	0	0	0	0	0	0	0	0	0	29.6914241734485	0	0	0	0	0	0	0	0	0	0	0	0	0	0	0	0	2.5903752582844	3.20666265046808	0	2.0656373185247	0	0	0	0	0	0	0	0	0	0	0	2.40293254017054	0	0	0	0	6.302502734203
BUD26	0	0	4.66813072098438	0	0	0	0	0	0	0	0	0	0	0	0	0	0	3.76983110297666	0	0	0	0	0	3.2054696537273	0	0	0	0	7.4917057639212	0	0	0	0	0	0	0	0	0	0	0	0	6.05438748330977	0	0	0	0	0	0	0
BUD27	11.0993119890642	12.0265660022811	7.61336802710165	10.4766260508617	5.28020570207833	7.12462637558369	6.8240760897031	6.12252490167178	16.0002938262322	13.3706774622394	3.09154654690263	2.62594395156345	11.8466086013196	12.4170605374072	16.8242791375852	11.7766354974631	11.6285504460729	16.9077955616088	18.640424533409	19.3541866810659	0.765549963481334	1.2258276372605	11.5163207266284	15.2915011960198	19.1638240336447	21.5615946675492	12.6634208237596	12.3627326359048	8.55289576311852	14.7472381344322	0.2950058233705	0.487114693421487	12.1559340778531	15.2141474697609	12.5609542583449	14.7302711896031	7.34578423543945	11.7637497749284	17.8643572729436	14.3909725291127	11.8603973892992	11.8490538639037	17.0992982722603	14.4512209431423	15.7030524126381	17.2793009318477	16.9937193564334	12.9383636002251	13.0060171693056
BUD28	8.71231513072996	2.09780912264337	71.7125592790055	16.7081328769525	21.3917687984612	3.37656202479265	0	10.2524190742513	40.6414456537096	18.8678031807088	0	5.4965661686029	45.1998272055702	5.84800247694435	58.9666500074844	39.4409739296822	19.4724938590229	5.79127456647762	0	12.3595208944248	3.20485363888431	0	5.49245233355306	57.4500684682054	35.845935548613	12.4981788075075	4.417803455858	0	42.1993936012783	0	0	0	6.93940151007245	0	0	41.8865097948318	0	0	20.3963190601964	0	3.31012670287639	18.6016451277872	39.045599066677	46.2632234058639	2.21590566666575	7.614443758429	27.6661766790032	0	88.672386796354
BUD3	3.62592862791279	3.56990740668794	3.3604073316519	3.94041999585902	4.98565714304143	5.43371018416594	0.932517984177886	2.65496891655206	5.09517931239563	4.53699292993912	6.52899293823524	4.67685099159211	3.97132437654501	4.25474585977866	3.45393132503461	5.47158077690934	3.69190512980423	4.21346275710831	8.87709684808359	10.2114590128603	3.55683560818671	4.6986658885606	4.13149910583734	4.37208185576377	3.78884311848397	6.01068884020706	9.1522765677196	11.2897202189766	7.37992051444104	8.2572396509374	2.05595697868576	3.6211193866976	9.49859333128541	8.02024880886921	8.66555101756671	9.94300940094822	5.58484534210109	5.61743687895597	7.09276488479083	7.32914628135685	6.36769465665941	8.71660748951182	6.01859308223052	6.31929457306714	3.77088654673572	5.21128239064211	8.33416327475276	10.8204117106032	8.80516956688807
BUD30	0	0.966672785083656	5.50753290400412	0.962390735234063	0	0.777959867345817	0	2.36216875125633	3.12126036839937	1.73885980741745	0	0	4.33917234114669	0	0	4.5436090849528	1.12161898710231	1.77907900883851	0	1.898426254672	0	0	1.68728097662446	4.53823452173049	0	1.91972443976938	4.07145937443098	0	5.30332627608143	0	0	0	0	0	0	4.82533804631381	0	0	0	0	0	0	0	1.63985809855847	0	0.877186040844647	1.82122887468368	0	6.45161937996926
BUD31	1.40530345356167	8.12109592811875	4.62690690505285	5.39006954522267	11.0416372024021	5.44639379308225	0	9.92234611832281	5.82710019548392	7.30415557480618	6.83218719366621	0	6.07562175406325	5.03087328634806	3.17046127860568	6.36185746620268	4.71138912853769	8.71860609034642	16.9926770079576	5.31625904375808	4.1355624702029	7.44978532001736	4.72499512341861	7.41339560034284	16.5199519367134	2.68795172220326	2.850384813394	0	7.42562004893927	30.6407894805673	0	1.97357986596489	13.4320303942241	9.48325411442056	21.590455029918	31.529511182443	10.8225715826006	5.29576644062279	13.1597897299397	6.72763553015602	14.9499196130893	8.00124637548594	20.9936473926837	18.3687220259342	11.4376748319719	12.2821650343553	12.7502237525121	8.98639639559413	6.02226194660858
[truncated: 5,973 more rows]
[truncated: 5 more columns]
