# Supplementary material for: Transition between fermentation and respiration determines history-dependent behavior in fluctuating carbon sources
Source: eLife journal article supplement (doi:10.7554/elife.39234), 2018-10-09
Supplement: supp [file elife-39234-supp-v1.zip › elife_poa_e39234_Supplementary_File_3.xlsx]

## Sheet: Sheet1
	Annotation of the sample numbers in the csv file of the expression data is detailed here.
	Mal_continuous
	Series of samples taken during continous growth on maltose media
		time(h)	0	1	3.83333	7
		sample_no	1	3	17	25
		notes	pregrown_mal	mal_washed	1st_doubling	final
	Glu_repression
	The first sample is pregrown in maltose. The cells are then washed into glucose. The rest of the samples are taken during glucose growth
			0	1.2	1.7	2.2	3	4.5	6.5	8.5	10.5	13
		time(h)	0	1.16667	1.75	2.16667	3	4.45	6.48333	8.51667	10.45	12.55
		sample_no	1	5	7	9	15	19	23	29	34	39
		notes	pregrown_mal	glu_washed	glu_1h	glu_1h30min	glu_2h	glu_4h	glu_6h	glu_8h	glu_10h	glu_12h
	Glu4hMal
	The first sample is pregrown in maltose. The cells are then washed into glucose and grown in glucose for 4h (until sample 19). Cells are washed into maltose (sample 21). The rest of the samples are taken in maltose.
		time(h)	0	1.16667	1.75	2.16667	3	4.45	5.28333	7.5	10.6667	13.5	16.5
		sample_no	1	5	7	9	15	19	21	27	35	43	49
		notes	pregrown_mal	glu_washed	glu_1h	glu_1h30min	glu_2h	glu_4h_before_wash	glu4h_afterwash	in_lag	in_lag	1st_doubling	final
	Glu8hMal
	The first sample is pregrown in maltose. The cells are then washed into glucose and grown in glucose for 8h (until sample 29). Cells are washed into maltose (sample 31). The rest of the samples are taken in maltose.
		time(h)	0	1.16667	1.75	2.16667	3	4.45	6.48333	8.51667	9.26667	11.5	14.5	17.5	19.5	21.75
		sample_no	1	5	7	9	15	19	23	29	31	37	45	51	55	57
		notes	pregrown_mal	glu_washed	glu_1h	glu_1h30min	glu_2h	glu_4h	glu_6h	glu_8h_before	glu_8h_afterwash	in_lag	in_lag	in_lag	1st_doubling	final
	Glu12hMal
	The first sample is pregrown in maltose. The cells are then washed into glucose and grown in glucose for 12h (until sample 39). Cells are washed into maltose (sample 41). The rest of the samples are taken in maltose.
		time(h)	0	1.16667	1.75	2.16667	3	4.45	6.48333	8.51667	10.45	12.55	13.1667	15.5	18.5	22.1333	24.75	27
		sample_no	1	5	7	9	15	19	23	29	34	39	41	47	53	59	61	63
		notes	pregrown_mal	glu_washed	glu_1h	glu_1h30min	glu_2h	glu_4h	glu_6h	glu_8h	glu_10h	glu12h_before_wash	glu12h_after_wash	in_lag	in_lag	in_lag	1st_doubling	2nd_doublong
