# Supplementary figures and images for: Transition between fermentation and respiration determines history-dependent behavior in fluctuating carbon sources
Source: eLife journal article supplement (doi:10.7554/elife.39234), 2018-10-09

# Figure 1-figure supplement 4

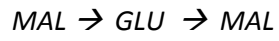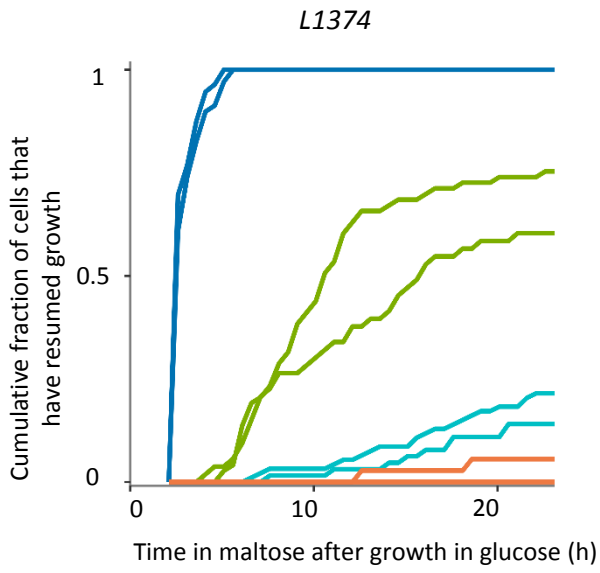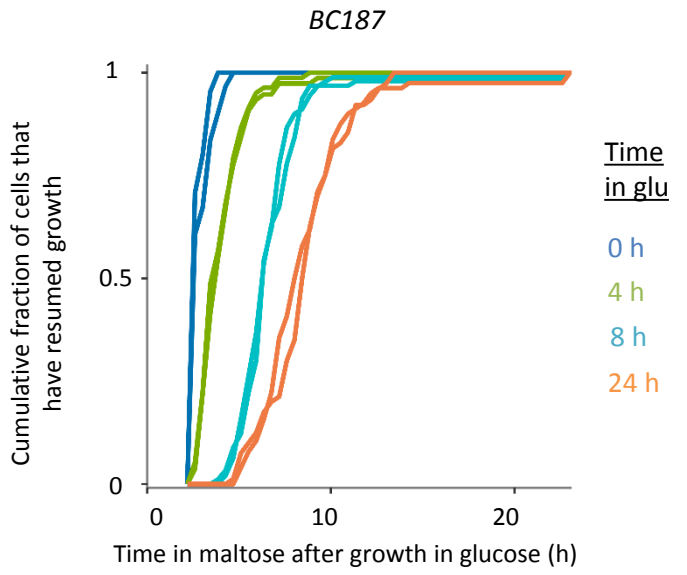

Supplement: supp [file elife-39234-supp-v1.zip]

# Figure 3-figure supplement 6

## Mating assay

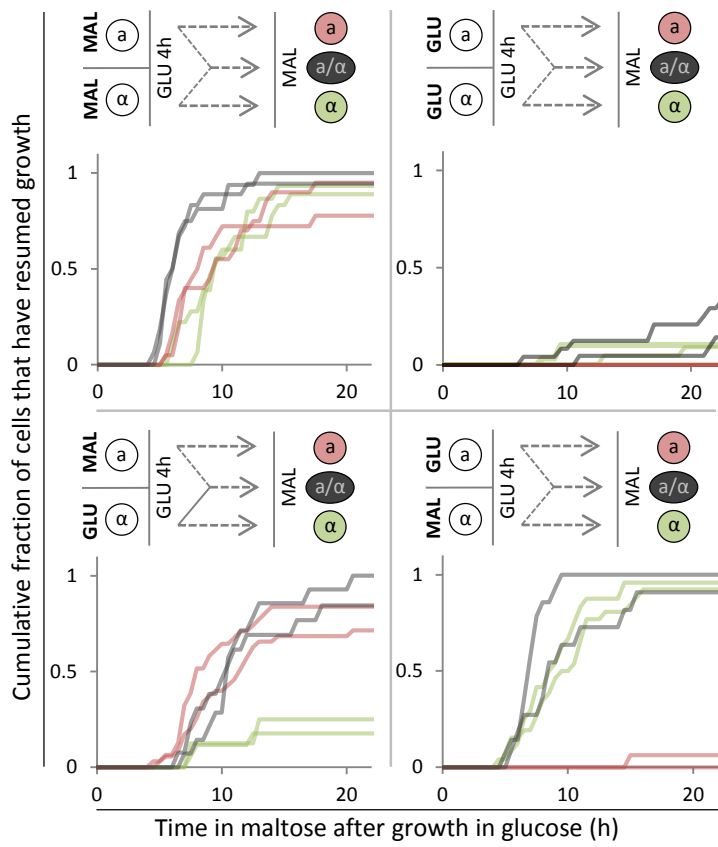

Supplement: supp [file elife-39234-supp-v1.zip]

# Figure 3-figure supplement 1

MAL → GLU 6h → MAL

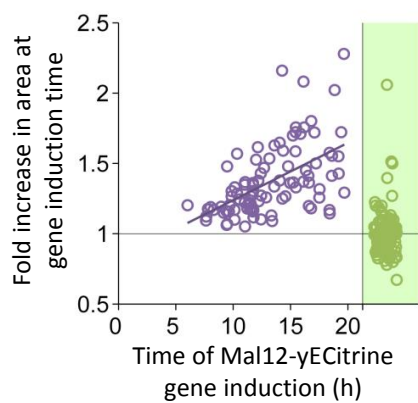

Supplement: supp [file elife-39234-supp-v1.zip]

# Figure 1-figure supplement 5

*MAL* → *GLU 6h* → *MAL*

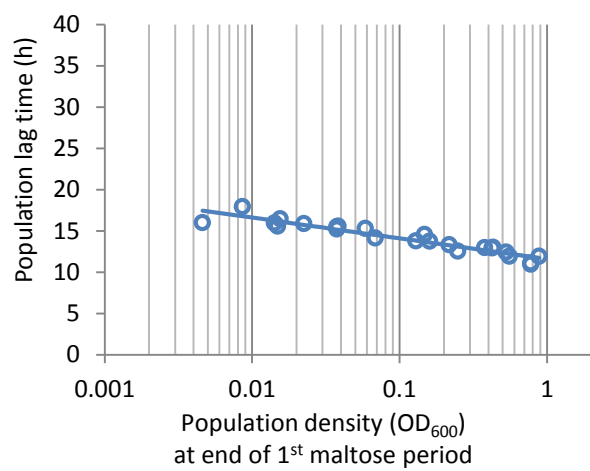

Supplement: supp [file elife-39234-supp-v1.zip]

# Figure 1-figure supplement 1

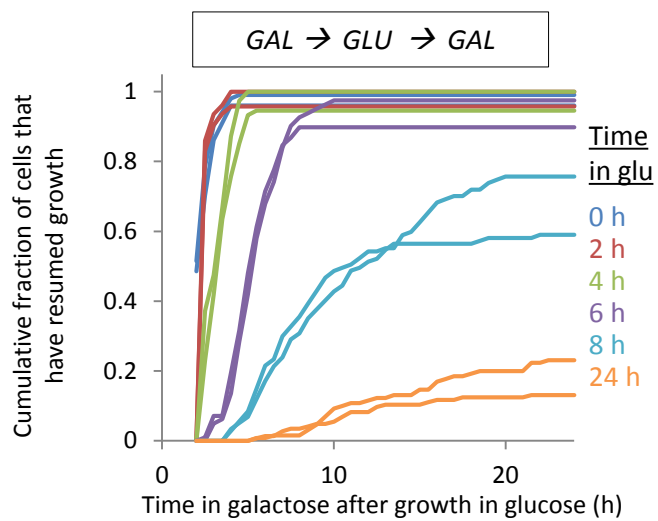

Supplement: supp [file elife-39234-supp-v1.zip]

# Figure 5-figure supplement 2

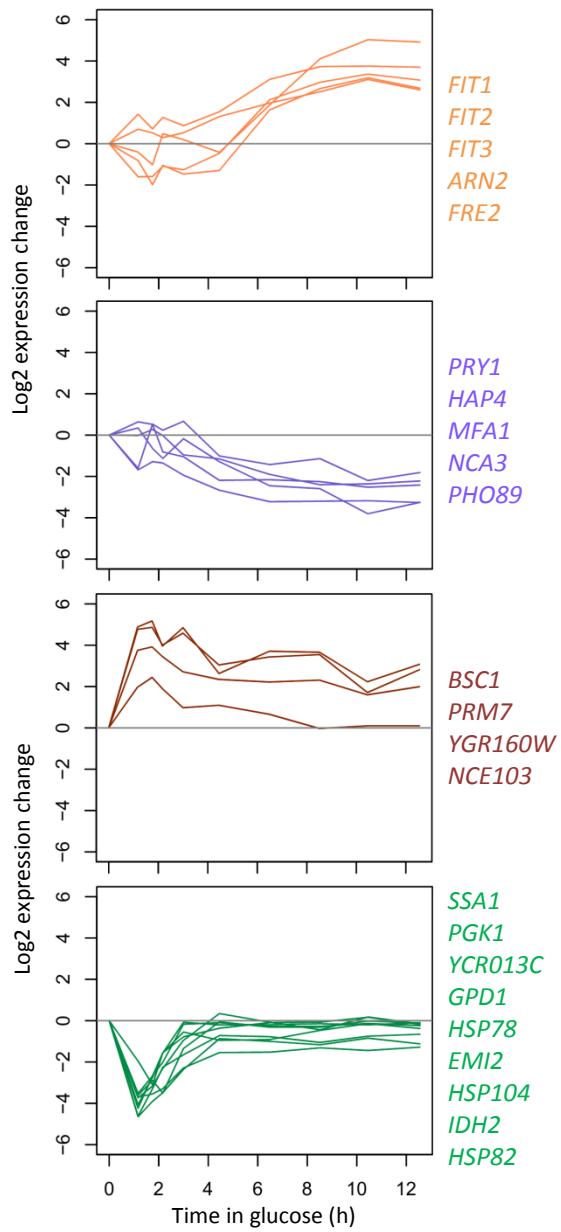

Supplement: supp [file elife-39234-supp-v1.zip]

# Figure 4-figure supplement 3

Visualization of  
HDB

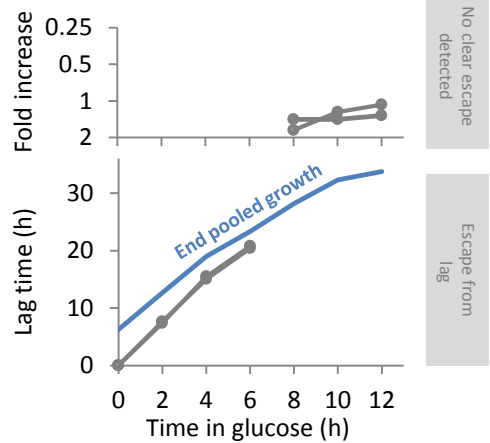

Supplement: supp [file elife-39234-supp-v1.zip]

# Figure 5-figure supplement 1

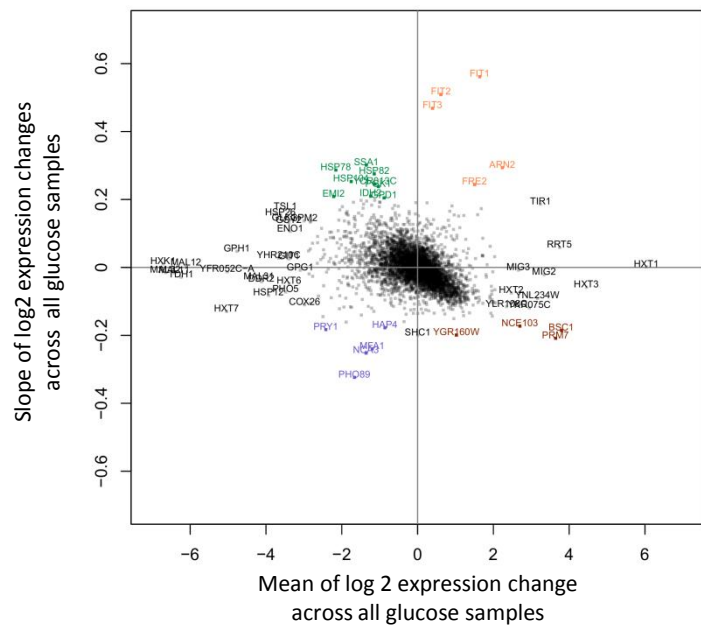

Supplement: supp [file elife-39234-supp-v1.zip]

# Figure 2-figure supplement 4

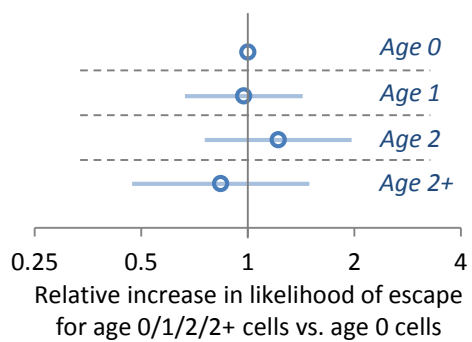

Supplement: supp [file elife-39234-supp-v1.zip]

# Figure 3-figure supplement 5

GAL → GLU → MAL

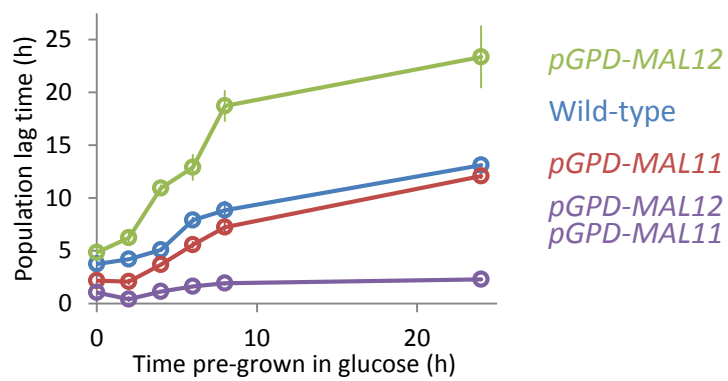

Supplement: supp [file elife-39234-supp-v1.zip]

# Figure 4-figure supplement 2

Example of data  
for 1 mutant

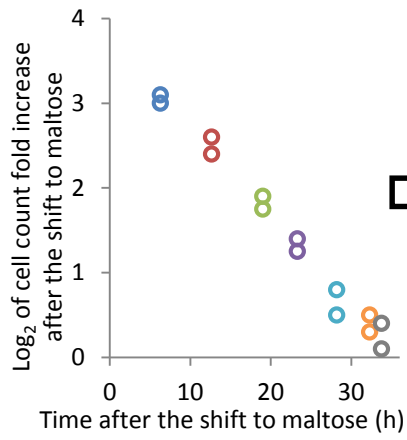

Growth rate and  
lag estimation

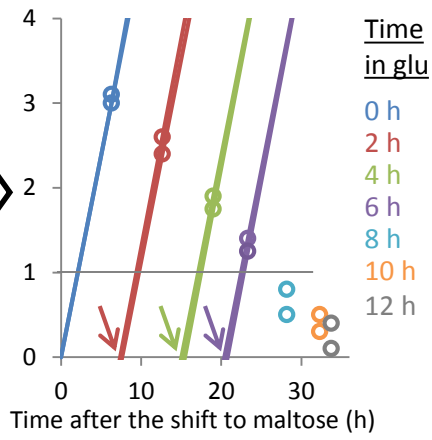

Supplement: supp [file elife-39234-supp-v1.zip]

# Figure 3-figure supplement 3

GAL → GLU 8h → GAL

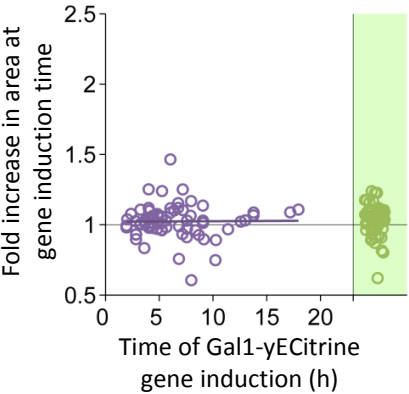

Supplement: supp [file elife-39234-supp-v1.zip]

# Figure 3-figure supplement 4

MAL → GLU → MAL

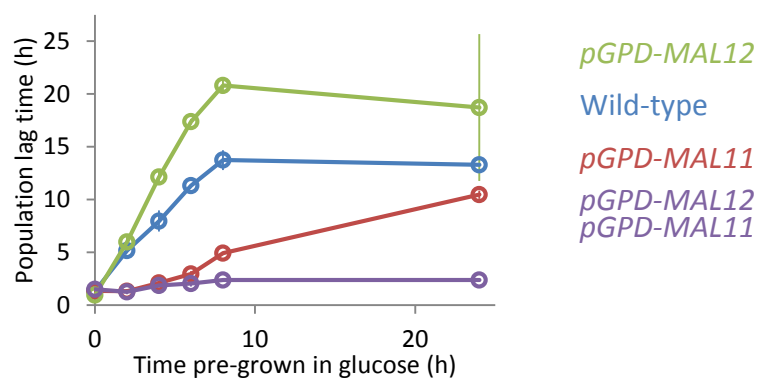

Supplement: supp [file elife-39234-supp-v1.zip]

# Figure 5-figure supplement 3

### Correlation Bar-seq and RNA-seq data

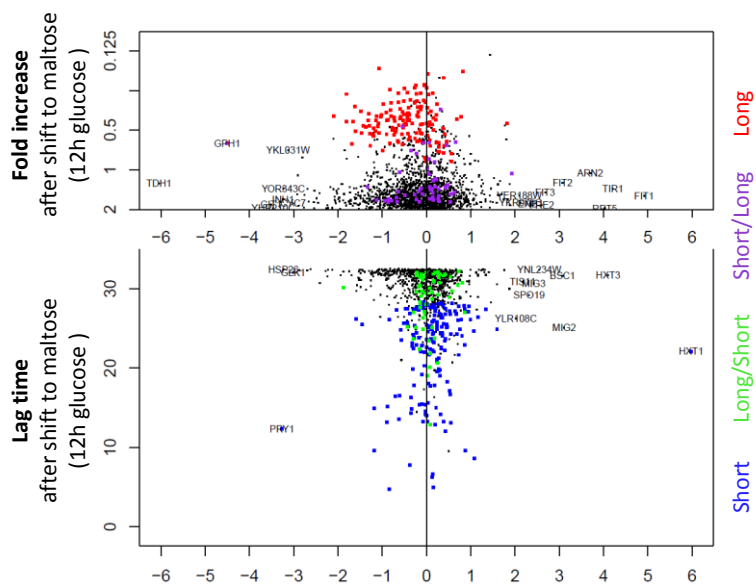

Supplement: supp [file elife-39234-supp-v1.zip]

# Figure 4-figure supplement 1

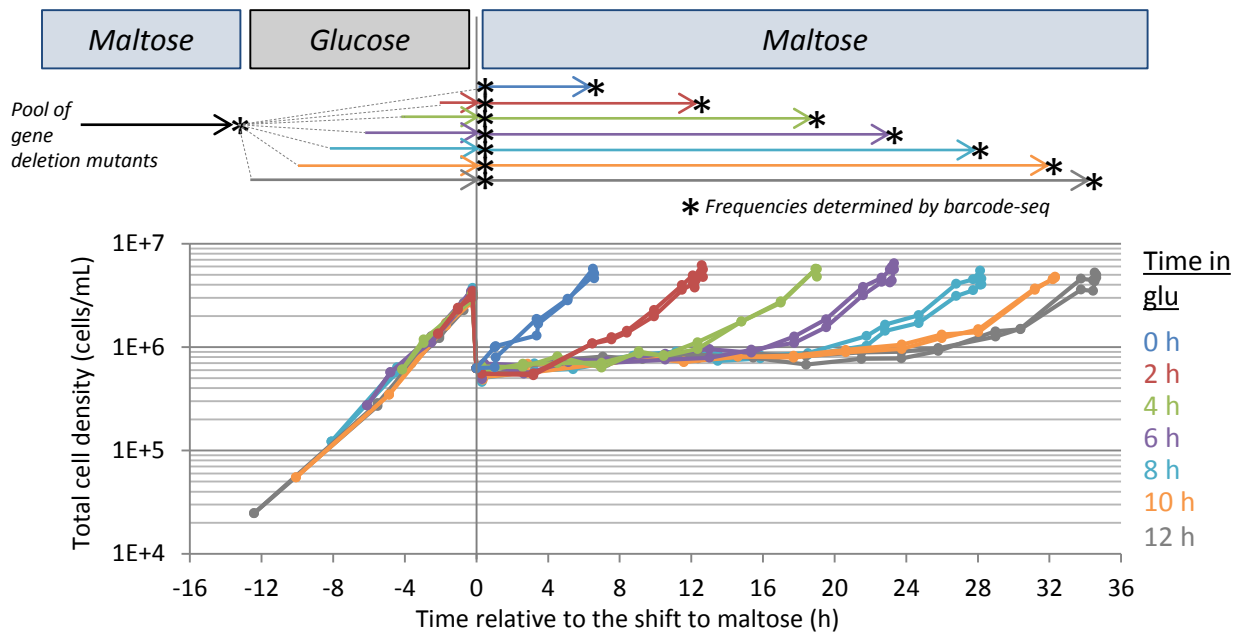

Supplement: supp [file elife-39234-supp-v1.zip]

# Figure 1-figure supplement 2

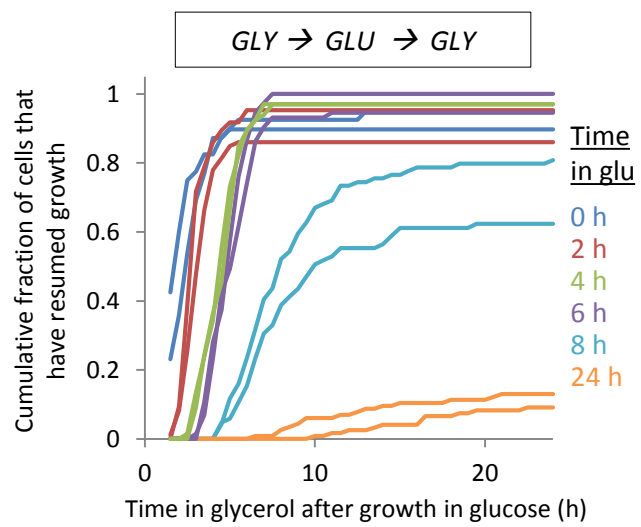

Supplement: supp [file elife-39234-supp-v1.zip]

# Figure 3-figure supplement 2

MAL → GLU 6h → MAL

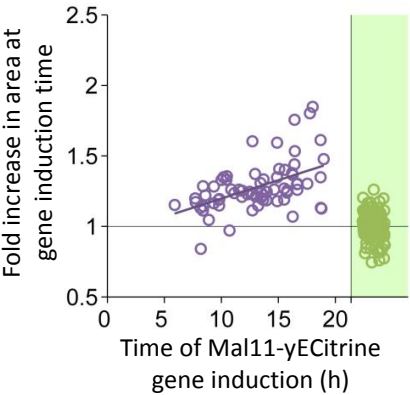

Supplement: supp [file elife-39234-supp-v1.zip]

# Figure 4-figure supplement 4

## Network of 'long $\rightarrow$ short' mutants

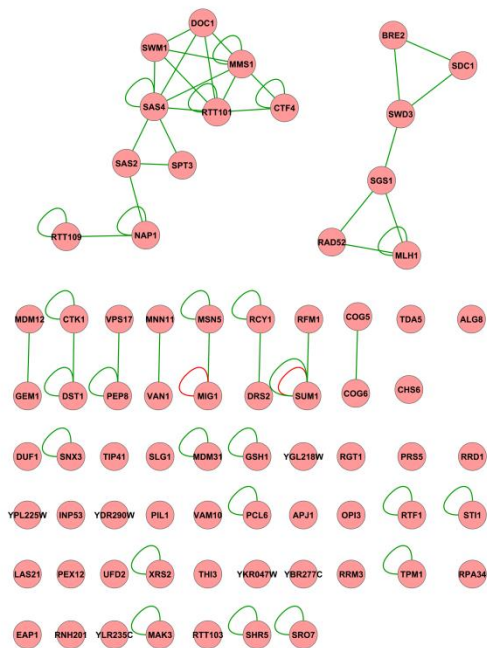

Supplement: supp [file elife-39234-supp-v1.zip › elife_poa_e39234_Figure_4_figure_supplement_4.pdf]

# Figure 1-figure supplement 3

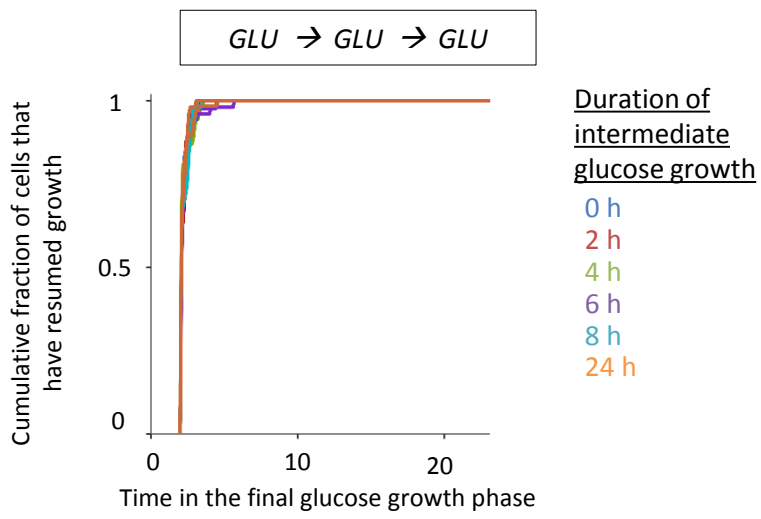

Supplement: supp [file elife-39234-supp-v1.zip › elife_poa_e39234_Figure_1_figure_supplement_3.pdf]

# Figure 2-figure supplement 2

MAL / GAL → GLU → GAL

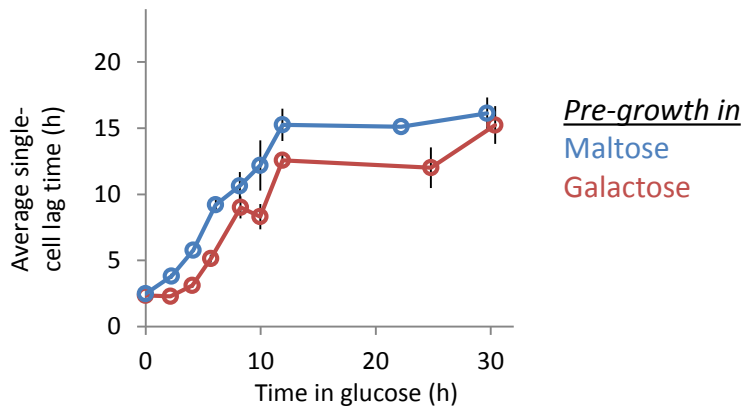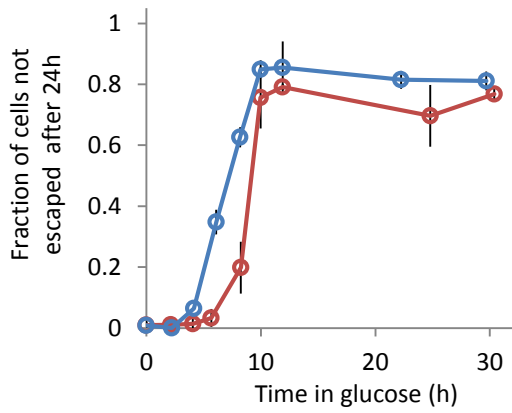

Supplement: supp [file elife-39234-supp-v1.zip › elife_poa_e39234_Figure_2_figure_supplement_2.pdf]

# Figure 4-figure supplement 6

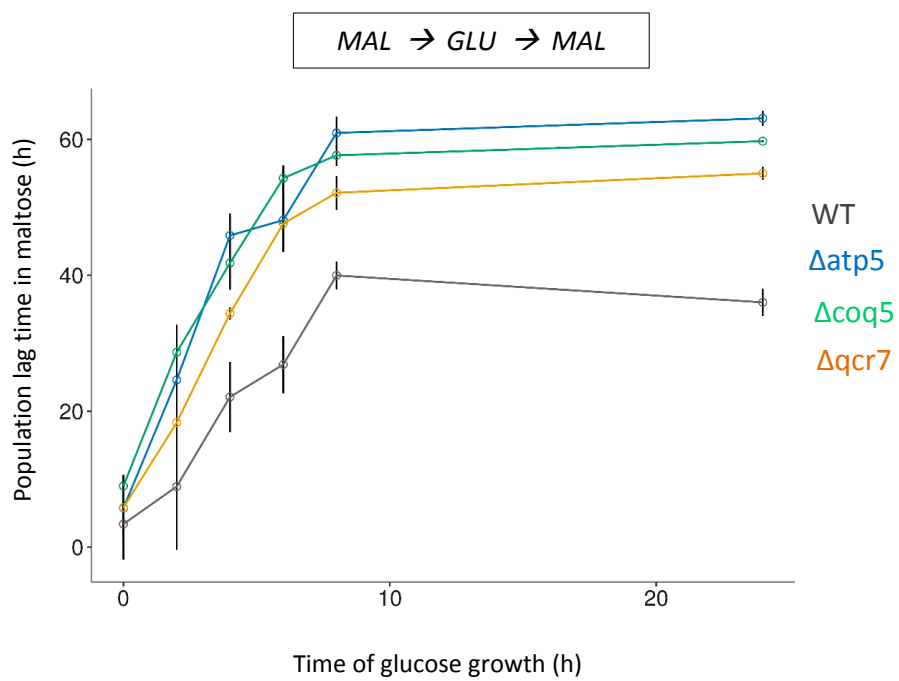

Supplement: supp [file elife-39234-supp-v1.zip › elife_poa_e39234_Figure_4_figure_supplement_6.pdf]

# Figure 2-figure supplement 1

MAL / GAL → GLU → MAL

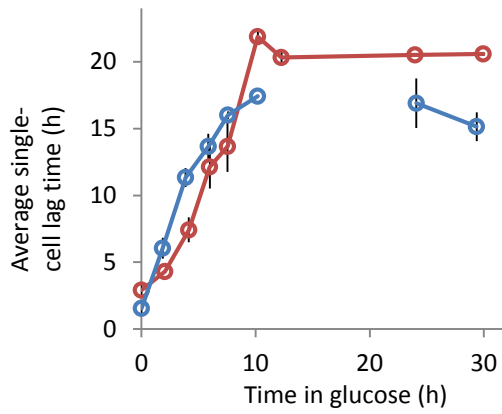

Pre-growth in

Maltose

Galactose

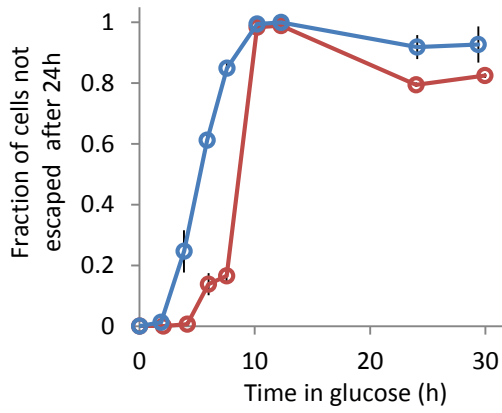

Supplement: supp [file elife-39234-supp-v1.zip › elife_poa_e39234_Figure_2_figure_supplement_1.pdf]

# Figure 3-figure supplement 7

Heterokaryon assay

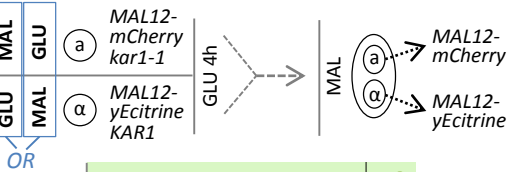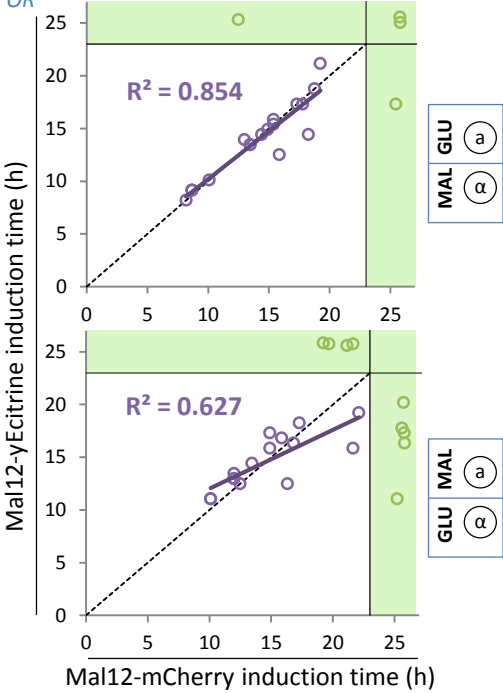

Supplement: supp [file elife-39234-supp-v1.zip › elife_poa_e39234_Figure_3_figure_supplement_7.pdf]

# Figure 1-figure supplement 6

*MAL* → *GLU* 24h → *MAL*

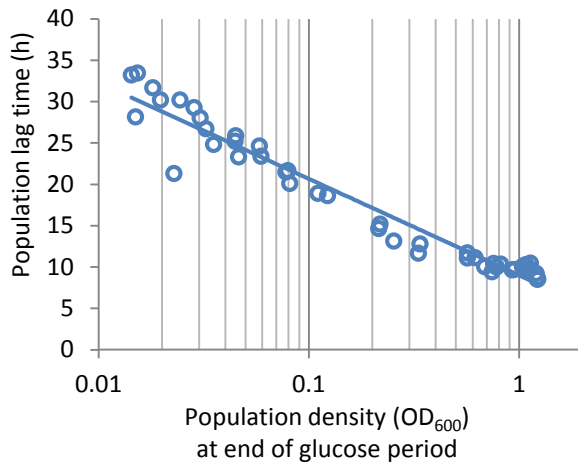

Supplement: supp [file elife-39234-supp-v1.zip › elife_poa_e39234_Figure_1_figure_supplement_6.pdf]

# Figure 4-figure supplement 5

Network of 'short → long' mutants

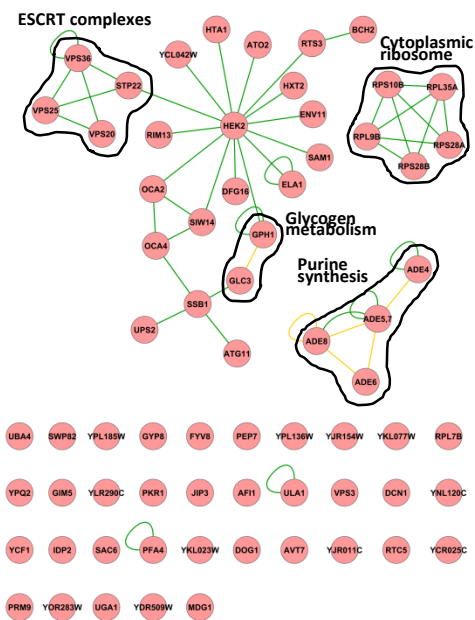

Supplement: supp [file elife-39234-supp-v1.zip › elife_poa_e39234_Figure_4_figure_supplement_5.pdf]

# Figure 6-figure supplement 2

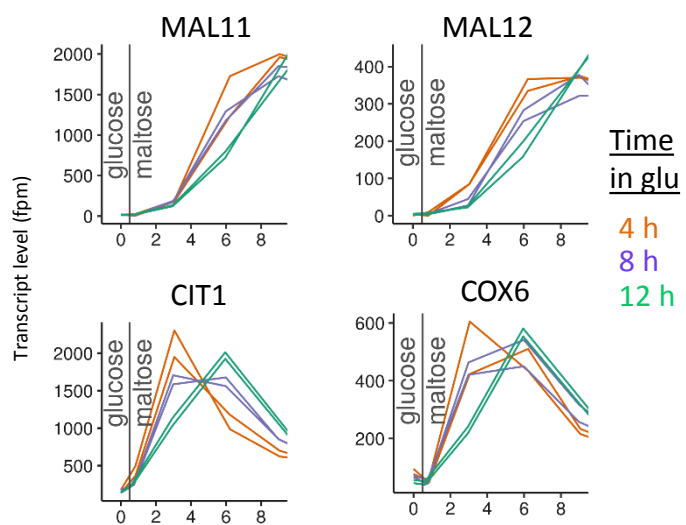

Time in maltose after growth in glucose (h)

Supplement: supp [file elife-39234-supp-v1.zip › elife_poa_e39234_Figure_6_figure_supplement_2.pdf]
